# Supplementary material for: Genome-wide profiling of sRNAs in the Verticillium dahliae-infected Arabidopsis roots
Source: Mycology. 2018 Jan 23;9(3):155–65. doi: 10.1080/21501203.2018.1426062 (PMC6115885; doi:10.1080/21501203.2018.1426062)
Supplement: Supplemental Material [file TMYC_A_1426062_SM1816.xlsx]

## Sheet: Table S1
Table S1. Summary of sRNAs datasets from Col-0 and V592-infected roots.
	Col-0	V592-infected
unique raw reads	1651400	1383365
matched genome unique reads	1046973	935039
total raw reads	12592432	10777567
matched genome total reads	11025817	9694779
matched ratio	0.875591	0.899533

## Sheet: Table S2
Table S2. The list of siRNA duplexes in the Col-0 and V592-infected roots.
Col-0						V592-infected
sequence1	clone1	sequence2	clone2			sequence1	clone1	sequence2	clone2
AAAATACCCATGCTTTCATTTTAA	1	AAAATGAAAGCATGGGTATTTTAG	1			AAAAATCTATCTAGCTAGTTTTCA	1	AAAACTAGCTAGATAGATTTTTTG	4
AAAAACGTTGACCGGTCATTTTAT	1	AAAATGACCGGTCAACGTTTTTGT	2			AAAAAGTAACCGTCAATATTTTAA	2	AAAATATTGACGGTTACTTTTTTA	2
AAAAGAAGAACTCCGTCATTTTGT	1	AAAATGACGGAGTTCTTCTTTTTG	2			AAAAAGTAACCGTCAATATTTTAA	2	AAAATATTGACGGTTACTTTTTTT	1
AAAAGCGTTGACCGACCATTTTAT	2	AAAATGGTCGGTCAACGCTTTTAC	1			AAAATATTACAAAGTGGATTTTTT	1	AAAATCCACTTTGTAATATTTTAA	1
AAAAGACGTCTGTAATAATTTTCT	1	AAAATTATTACAGACGTCTTTTAT	1			AAAAGCGTTGACCGACCATTTTAT	2	AAAATGGTCGGTCAACGCTTTTAC	2
AAAATGTAGTTTGAGATGGTTTAA	1	AAACCATCTCAAACTACATTTTAA	1			AAAAATACACAGCGTACATTTTAT	3	AAAATGTACGCTGTGTATTTTTAT	1
AAAAGGGTTAGCATGGTTTAC	1	AAACCATGCTAACCCTTTTTA	1			AAAATGAGTATAAGTGTTGTTTAA	1	AAACAACACTTATACTCATTTTCT	1
AAAACGACGTCGTTTTGGGTTTCT	2	AAACCCAAAACGACGTCGTTTTAA	1			AAACAAGTGTCTTCGTAGGTTTCT	1	AAACCTACGAAGACACTTGTTTAT	1
AAAACAGATGCTGCAAGGGTTTGG	3	AAACCCTTGCAGCATCTGTTTTGA	13			AAAAGACAAAGCGACGTCGTTTTA	1	AAACGACGTCGCTTTGTCTTTTGA	1
AAAAAGGGATTGTGACACGTTTAG	11	AAACGTGTCACAATCCCTTTTTCA	1			AAACCAGTTCTCACAGTCGTTTTA	1	AAACGACTGTGAGAACTGGTTTGA	1
AAAATCTATCTAGCTAGTTTTC	1	AAACTAGCTAGATAGATTTTTT	1			AAAATTTGAACCGTACCCGTTTTT	1	AAACGGGTACGGTTCAAATTTTGA	1
AAAAAATCTATCTAGCTAGTTTTC	5	AAACTAGCTAGATAGATTTTTTGA	10			AAAAAATCTATCTAGCTAGTTTTC	3	AAACTAGCTAGATAGATTTTTTGA	8
AAAACGACAATTTCAAGAGTTTAC	1	AAACTCTTGAAATTGTCGTTTTAT	1			AAACGACGTCGTTTTGCAGTTTAA	1	AAACTGCAAAACGACGTCGTTTTA	1
AAACATATACAACTCGCAGTTTAC	1	AAACTGCGAGTTGTATATGTTTTG	2			AAAACGATAAGCCGGACAGTTTGG	2	AAACTGTCCGGCTTATCGTTTTTG	1
AAACATATACAACTCACAGTTTAC	2	AAACTGTGAGTTGTATATGTTTTG	9			AAAATCTGTAAACCGTTCTTTGA	1	AAAGAACGGTTTACAGATTTTCT	1
AAACATATACAACTCACAGTTTAC	2	AAACTGTGAGTTGTATATGTTTTA	1			AAAACACTAACCAACCTTCTTTTT	1	AAAGAAGGTTGGTTAGTGTTTTGG	2
AAAATAGACGACTTCGAAGTTTGA	4	AAACTTCGAAGTCGTCTATTTTTA	2			AAACTTCATGGTCAGATTCTTTAT	1	AAAGAATCTGACCATGAAGTTTTG	5
AAAAGGTATCACATGCCAAGTTTGG	2	AAACTTGGCATGTGATACCTTTTCA	1			AAACCAGATTGTTGTTGTCTTTAC	1	AAAGACAACAACAATCTGGTTTTA	1
AAAAGCAAAAATAGGTTTCTTTGA	2	AAAGAAACCTATTTTTGCTTTTGT	1			AAAAATGACTACTGTTCTCTTTTT	3	AAAGAGAACAGTAGTCATTTTTAG	1
AAACCTCTGTTGTTTCTTCTTTTT	1	AAAGAAGAAACAACAGAGGTTTGC	1			AAAAGTTCTCGGATTCTCTTTTT	1	AAAGAGAATCCGAGAACTTTTTA	1
AAAAGTCCGGACACTGTCTTTGT	1	AAAGACAGTGTCCGGACTTTTGA	2			AAACTAATAAATACATATCTTTTT	1	AAAGATATGTATTTATTAGTTTAC	2
AAAGACGATAAAATTATGCTTTAG	4	AAAGCATAATTTTATCGTCTTTAG	5			AAAGACGATAAAATTATGCTTTAG	10	AAAGCATAATTTTATCGTCTTTAG	1
AAACGTTGGATATATGCTTTAT	25	AAAGCATATATCCAACGTTTAC	1			AAAAATCAAGAGAGTCGGCTTTCT	6	AAAGCCGACTCTCTTGATTTTTAT	1
AAAATCCCTCCCAACATGCTTTGA	1	AAAGCATGTTGGGAGGGATTTTTT	13			AAAACGAGGAAAGTTAGGCTTTAA	1	AAAGCCTAACTTTCCTCGTTTTTT	2
AAAAAGTAGATATATGGGCTTTAA	3	AAAGCCCATATATCTACTTTTTCT	1			AAAATCTACCAAGTCTCGCTTTAC	1	AAAGCGAGACTTGGTAGATTTTTC	2
AAAAATCAAGAGAGTCGGCTTTCT	6	AAAGCCGACTCTCTTGATTTTTAT	1			AAACTAAGTCTGCATCGCTTTAT	1	AAAGCGATGCAGACTTAGTTTAA	1
AAAATGGTCGGTCAACGCTTTTA	2	AAAGCGTTGACCGACCATTTTAT	1			AAAATTCTTTCTAATGCCCTTTTC	1	AAAGGGCATTAGAAAGAATTTTTC	7
AAACAGTTTTACCTTCAGCTTTTT	1	AAAGCTGAAGGTAAAACTGTTTGT	2			AAACTTGGCATGTGATACCTTTTC	8	AAAGGTATCACATGCCAAGTTTGG	5
AAAACATGAATCTTTAAGCTTTAA	1	AAAGCTTAAAGATTCATGTTTTGT	1			AAACTTGGCATGTGATACCTTTTA	2	AAAGGTATCACATGCCAAGTTTGG	5
AAACGTGTCATATTGCCTTTTA	3	AAAGGCAATATGACACGTTTAG	1			AAACTTGGCATGTGATACCTTTTT	1	AAAGGTATCACATGCCAAGTTTGG	5
AAACTTGGCATGTGATACCTTTTC	6	AAAGGTATCACATGCCAAGTTTGG	20			AAACTTGACATGTGATACCTTTTC	1	AAAGGTATCACATGTCAAGTTTGG	1
AAACTTTCGATGTGGGACCTTTGG	1	AAAGGTCCCACATCGAAAGTTTAG	1			AAAGCAGATCTCACATACTTTTA	60	AAAGTATGTGAGATCTGCTTTTT	1
AAAGCGGAATCAAATGGACTTTAC	3	AAAGTCCATTTGATTCCGCTTTTC	1			AAAATCTGCCATATTCCACTTTAT	1	AAAGTGGAATATGGCAGATTTTAC	8
AAAACGAGGAAAGCTAGACTTTAA	2	AAAGTCTAGCTTTCCTCGTTTTTC	8			AAAACGTAACCTGTGACACTTTGA	2	AAAGTGTCACAGGTTACGTTTTTT	1
AAAATCTGCCATATTCCACTTTAT	1	AAAGTGGAATATGGCAGATTTTAC	10			AAACAATCACGGCGTTAACTTTCA	1	AAAGTTAACGCCGTGATTGTTTGG	41
AAAAATACACAGCGTACACTTTAC	8	AAAGTGTACGCTGTGTATTTTTAT	1			AAAAGATGACCGAGTTAACTTTTC	2	AAAGTTAACTCGGTCATCTTTTAA	3
AAAAATACACAGCGTACACTTTAT	4	AAAGTGTACGCTGTGTATTTTTAT	1			AAACCGGTGACCTTTAAACTTTGC	2	AAAGTTTAAAGGTCACCGGTTTAA	3
AAAACGTAACCTGTGACACTTTGA	2	AAAGTGTCACAGGTTACGTTTTTT	1			AAAGACACTATTTCGAAACTTTGG	2	AAAGTTTCGAAATAGTGTCTTTAC	1
AAACAATCACGGCGTTAACTTTCA	1	AAAGTTAACGCCGTGATTGTTTGG	46			AAAGAGGCCAGTTGTAGTATTTAG	1	AAATACTACAACTGGCCTCTTTAT	1
AAAAGATGACCGAGTTAACTTTTC	1	AAAGTTAACTCGGTCATCTTTTAA	2			AAAGTGTCTATTCTCCCTATTTCT	2	AAATAGGGAGAATAGACACTTTTC	10
AAAACCGATGCATTCAACTTTAC	1	AAAGTTGAATGCATCGGTTTTGA	2			AAAATGCATAAGACTACTATTTTA	1	AAATAGTAGTCTTATGCATTTTAT	1
AAAATCGCAACCTATTCTATTTTA	2	AAATAGAATAGGTTGCGATTTTAA	2			AAACAGTGAAAAGTGACTATTTTG	2	AAATAGTCACTTTTCACTGTTTGA	5
AAATACACTACTCCCTCTATTTCA	1	AAATAGAGGGAGTAGTGTATTTAA	2			AAAGAAATTACAGAACGGATTTTA	30	AAATCCGTTCTGTAATTTCTTTAC	1
AAAATCCCTTGTAAATCTATTTCC	2	AAATAGATTTACAAGGGATTTTAA	6			AAAATCCGAGATCGTTAGATTTGA	2	AAATCTAACGATCTCGGATTTTAC	7
AAAATCCCTTGTAAATCTATTTCT	1	AAATAGATTTACAAGGGATTTTAA	6			AAAAGGCTTCTCCTGTAGATTTGG	1	AAATCTACAGGAGAAGCCTTTTCA	1
AAAGCTGCTTTGAATCCTATTTAC	1	AAATAGGATTCAAAGCAGCTTTAG	1			AAAGACGGGTCATCAAAGATTTCC	5	AAATCTTTGATGACCCGTCTTTAG	1
AAAGTGTCTATTCTCCCTATTTCT	1	AAATAGGGAGAATAGACACTTTTC	8			AAAGACGGGTCATCAAAGATTTTC	1	AAATCTTTGATGACCCGTCTTTAG	1
AAACAGTGAAAAGTGACTATTTTG	1	AAATAGTCACTTTTCACTGTTTGA	2			AAAGACGGGTCATCAAAGATTTCA	1	AAATCTTTGATGACCCGTCTTTAG	1
AAAGTACCCTCTTAGCATATTTCC	1	AAATATGCTAAGAGGGTACTTTTT	3			AAAGACGCGTCATCAAAGATTTCT	26	AAATCTTTGATGACGCGTCTTTAG	1
AAAGCTCGTTTGATTCTGATTTTC	1	AAATCAGAATCAAACGAGCTTTTA	1			AAAGCATCCTGTTAATTCATTTGA	1	AAATGAATTAACAGGATGCTTTAT	2
AAAGATCGTCAATATATGATTTTA	1	AAATCATATATTGACGATCTTTGG	4			AAAATCCATCCGTCATTTCA	1	AAATGACGGATGGATTTTGT	1
AAAAGCGGAATCAAATGGATTTAA	2	AAATCCATTTGATTCCGCTTTTTC	1			AAACGGAGGGAGTATATCATTTAC	5	AAATGATATACTCCCTCCGTTTCA	2
AAAGATTTACAAGGGATTTTA	1	AAATCCCTTGTAAATCTTTTA	1			AAAGAGACGATTCTTAGCATTTAT	1	AAATGCTAAGAATCGTCTCTTTTG	1
AAAAAGTGTAAACTGCGGATTTAA	1	AAATCCGCAGTTTACACTTTTTTT	1			AAAAAACCGCAGCGTACCATTTGC	1	AAATGGTACGCTGCGGTTTTTTTC	4
AAATATATTACGACGTCGATTTGC	5	AAATCGACGTCGTAATATATTTGC	1			AAACTGGTTCTGCTTACATTTAA	1	AAATGTAAGCAGAACCAGTTTAT	1
AAAGCATCCTGTTAATTCATTTGA	2	AAATGAATTAACAGGATGCTTTAT	1			AAAGAAGCTGTACACATTTTA	1	AAATGTGTACAGCTTCTTTGC	1
AAACCAGTCGTCATCGTCATTTCT	1	AAATGACGATGACGACTGGTTTCC	5			AAAATGCAGCGTTTAATTTAA	1	AAATTAAACGCTGCATTTTAC	1
AAACGGAGGGAGTATATCATTTAC	7	AAATGATATACTCCCTCCGTTTCA	5			AAACAAACAGATCCATTAATTTCT	1	AAATTAATGGATCTGTTTGTTTAA	7
AAAATGGAAACGAACATCATTTAG	1	AAATGATGTTCGTTTCCATTTTTG	1			AAATGAACAAGCGGATGAATTTTA	1817	AAATTCATCCGCTTGTTCATTTTA	1
AAACGCATCTTAAATCACATTTTT	3	AAATGTGATTTAAGATGCGTTTTA	1			AAAAGCTGAACACAGAGAATTTAA	4	AAATTCTCTGTGTTCAGCTTTTCT	1
AAACAGCCTAAGCCCAACATTTCG	1	AAATGTTGGGCTTAGGCTGTTTCC	10			AAAGTCTCTGGTCACAGAATTTCC	1	AAATTCTGTGACCAGAGACTTTCA	6
AAACAAACAGATCCATTAATTTCT	2	AAATTAATGGATCTGTTTGTTTAA	4			AAAGAACGACAGTAAAGAATTTAT	5	AAATTCTTTACTGTCGTTCTTTAA	1
AAAATATGTTTGTATGAATTTCA	1	AAATTCATACAAACATATTTTTA	1			AAAGACTGTATCCTAAATTTCT	5	AAATTTAGGATACAGTCTTTAT	2
AAATGAACAAGCGGATGAATTTTA	877	AAATTCATCCGCTTGTTCATTTTA	4			AAAATCACGAACTTTCAAATTTAG	1	AAATTTGAAAGTTCGTGATTTTTT	5
AAAGACTGTATCCTAAATTTCT	3	AAATTTAGGATACAGTCTTTAT	1			AAAGTGGTTAGAGATCAAATTTAA	1	AAATTTGATCTCTAACCACTTTGA	1
AAAATGGTTAGAGATCAAATTTGA	2	AAATTTGATCTCTAACCATTTTGA	3			AAAACTCTGACCTCCTGTTGTTGA	1	AACAACAGGAGGTCAGAGTTTTGG	1
AAAGAATAGGGCTCCGTTTGTTTC	1	AACAAACGGAGCCCTATTCTTTTT	1			AAAAGAAAAGGTCAAAGTTGTTAC	1	AACAACTTTGACCTTTTCTTTTGA	1
AAAAAAGAAGGCCAATGTTGTTAC	4	AACAACATTGGCCTTCTTTTTTAA	1			AAAGACGATACTAGGATTGTTGT	1	AACAATCCTAGTATCGTCTTTCA	1
AAACTGGATGGAGATGGTTGTTAA	4	AACAACCATCTCCATCCAGTTTTT	1			AAATGAAGTTTAGGAGATTGTTAA	3	AACAATCTCCTAAACTTCATTTGA	1
AAAGAAAGGTATAGCGTTGTTAC	1	AACAACGCTATACCTTTCTTTTG	1			AAAAAGTCCAAAAAAAATTGTTGC	8	AACAATTTTTTTTGGACTTTTTGG	3
AAAGAAGAGAATCATGCTTGTTAA	1	AACAAGCATGATTCTCTTCTTTAA	11			AAACAAATATGGGACGTCTGTTAC	1	AACAGACGTCCCATATTTGTTTTC	1
AAAAGACTGCGCTAGGCTTGTTGT	7	AACAAGCCTAGCGCAGTCTTTTGG	2			AAACCCTTGCAGCATCTGTTTT	5	AACAGATGCTGCAAGGGTTTGG	2
AAATGGATGATTTCAGCTTGTTAG	1	AACAAGCTGAAATCATCCATTTAA	3			AAAGTATCATGTAGAATCTGTTGT	1	AACAGATTCTACATGATACTTTAA	4
AAATAGATTTATTCAGCTTGTTGG	1	AACAAGCTGAATAAATCTATTTAA	3			AAAGTGCCATGCAGAATCTGTTGT	35	AACAGATTCTGCATGGCACTTTGA	489
AAAATGAAAACTGGTGATTGTTGC	2	AACAATCACCAGTTTTCATTTTCT	1			AAACCCTGAACTAAAACCTGTTAA	4	AACAGGTTTTAGTTCAGGGTTTGT	2
AAAATTAGGTGGCGGAATTGTTGA	1	AACAATTCCGCCACCTAATTTTTC	1			AAAATAGTCACTTTTCACTGTTTG	1	AACAGTGAAAAGTGACTATTTTGC	1
AAAAAGTCCAAAAAAAATTGTTGC	4	AACAATTTTTTTTGGACTTTTTGG	1			AAAACAATCACTTTTCACTGTTTG	1	AACAGTGAAAAGTGATTGTTTTGC	1
AAAATCGCATCGCAACAGTGTTGT	1	AACACTGTTGCGATGCGATTTTGG	1			AAATATGGTGCACTCCTATGTTAT	2	AACATAGGAGTGCACCATATTTAT	7
AAAGATCTTGTTCTTGTCTGTTTT	1	AACAGACAAGAACAAGATCTTTTC	1			AAACATTGTCCCTAATCATGTTTT	2	AACATGATTAGGGACAATGTTTAC	97
AAAATGAATAACGGGTCTGTTGG	4	AACAGACCCGTTATTCATTTTTA	1			AAAATTGGGTTGGGCTTTGGTTTA	1	AACCAAAGCCCAACCCAATTTTGT	1
AAAAATGAATAACGGGTCTGTTGG	7	AACAGACCCGTTATTCATTTTTAA	2			AAACAACACATGGGCTTTGGTTAA	5	AACCAAAGCCCATGTGTTGTTTAT	1
AAACCCTTGCAGCATCTGTTTT	5	AACAGATGCTGCAAGGGTTTGG	2			AAAAGAGTACTGGCCGTTGGTTTT	1	AACCAACGGCCAGTACTCTTTTGC	1
AAAGTGCCATGCAGAATCTGTTGT	38	AACAGATTCTGCATGGCACTTTGA	736			AAATGACGATGACGACTGGTTTC	2	AACCAGTCGTCATCGTCATTTCT	1
AAACTGTCATGTAAAATCTGTTGT	2	AACAGATTTTACATGACAGTTTAA	1			AAACTTTGTAGACATCATGGTTAA	1	AACCATGATGTCTACAAAGTTTGT	1
AAACCAACGATAACGGCTGTTAG	1	AACAGCCGTTATCGTTGGTTTAA	2			AAACTCGAACGACGCGTGGGTTAT	2	AACCCACGCGTCGTTCGAGTTTAT	2
AAATGTTGGGCTTAGGCTGTTTC	1	AACAGCCTAAGCCCAACATTTCG	1			AAAGGCAACGGAGGAACTGGGTTAG	1	AACCCAGTTCCTCCGTTGCCTTTGT	1
AAACCCTGAACTAAAACCTGTTAA	5	AACAGGTTTTAGTTCAGGGTTTGT	8			AACAGATGCTGCAAGGGTTTG	1	AACCCTTGCAGCATCTGTTTT	6
AAACCCTGAACTAAAACCTGTTAC	1	AACAGGTTTTAGTTCAGGGTTTGT	8			AAAAGAAGACGATACAAGGGTTGT	2	AACCCTTGTATCGTCTTCTTTTAA	1
AAATATGGTGCACTCTTATGTTAT	1	AACATAAGAGTGCACCATATTTAT	3			AAAAAATGTAGGATTTTCGGTTTT	7	AACCGAAAATCCTACATTTTTTAT	1
AAAGTAGGATGTCGTGTATGTTCG	2	AACATACACGACATCCTACTTTGA	1			AACCAAATAGTACTTGTCGGTTAC	5	AACCGACAAGTACTATTTGGTTCT	1
AAATATGGTGCACTCCTATGTTAT	5	AACATAGGAGTGCACCATATTTAT	15			AACAGTCCTCGACAAGTCGGTTCG	3	AACCGACTTGTCGAGGACTGTTAG	3
AAAGGCGGCTTTTCTGGATGTTCG	2	AACATCCAGAAAAGCCGCCTTTGG	1			AAAGAGCGTTAGGAACGAGGTTAC	21	AACCTCGTTCCTAACGCTCTTTGT	1
AACATGATTAGGGACAATGTTTA	2	AACATTGTCCCTAATCATGTTTT	1			AAAAACGTACCGTTGAGAGGTTGA	4	AACCTCTCAACGGTACGTTTTTAT	17
AAATAAGCGTCGGGGAAATGTTTT	1	AACATTTCCCCGACGCTTATTTGG	1			AACCTCATTGACCTGGCAGGTTCT	5	AACCTGCCAGGTCAATGAGGTTCT	1
AAAGGGTTATAATGCAAATGTTGA	4	AACATTTGCATTATAACCCTTTAA	1			AACATGTAATATTAGTTTCGTTGT	3	AACGAAACTAATATTACATGTTGT	1
AAAGGGTTATAATGCAAATGTTAA	1	AACATTTGCATTATAACCCTTTAA	1			AACCGTCGCTGTGTTGTTCGTTTG	11	AACGAACAACACAGCGACGGTTAT	1
AAAACCGACACCCGACTGGTTCA	1	AACCAGTCGGGTGTCGGTTTTAA	1			AAACAAACAACTTTTGGTCGTTGT	2	AACGACCAAAAGTTGTTTGTTTGC	1
AAAAGCGTGAGAGGCTATGGTTAC	11	AACCATAGCCTCTCACGCTTTTGC	1			AAAATTGCGGTCGCTGGTCGTTGG	6	AACGACCAGCGACCGCAATTTTTG	2
AAATAGTAACAAAGATATGGTTTC	1	AACCATATCTTTGTTACTATTTAA	1			AAAAATGTTGACCGGTCGTTTC	2	AACGACCGGTCAACATTTTTAT	1
AAAGAATGTATTTAGGTGGGTTTT	1	AACCCACCTAAATACATTCTTTAT	1			AAAGCCAAAACTTACGGTCGTTAC	8	AACGACCGTAAGTTTTGGCTTTAG	2
AAAAACTGGGTTAGGGCGGGTTAA	7	AACCCGCCCTAACCCAGTTTTTTG	1			AACCCTCCAAGTCGATCTCGTTTG	1	AACGAGATCGACTTGGAGGGTTAT	2
AAAGACGACGTTACTAGGGTTTT	1	AACCCTAGTAACGTCGTCTTTCA	2			AACCTATTCCATTTGATCGTTAG	2	AACGATCAAATGGAATAGGTTAA	2
AAAATTTGATTATTGGAGGGTTTA	1	AACCCTCCAATAATCAAATTTTCT	1			AACAGAACAACTGATCGTTAT	5	AACGATCAGTTGTTCTGTTGA	1
AACAGATGCTGCAAGGGTTTG	1	AACCCTTGCAGCATCTGTTTT	1			AAAGGTGACCGACGCCGGCGTTGT	3	AACGCCGGCGTCGGTCACCTTTCT	1
AAAAGAAGACGATACAAGGGTTGT	2	AACCCTTGTATCGTCTTCTTTTAA	6			AACAGGTAATGTTAGTTCCGTTCC	1	AACGGAACTAACATTACCTGTTAT	5
AAAGTTTAGTATCCATTCGGTTAT	1	AACCGAATGGATACTAAACTTTGG	2			AACACAAACCATATATTCCGTTAC	1	AACGGAATATATGGTTTGTGTTTT	7
AAAAATCCTCTATATCTCGGTTAG	1	AACCGAGATATAGAGGATTTTTGG	4			AAATTAAGTCTAGGCCTCCGTTAT	2	AACGGAGGCCTAGACTTAATTTAT	8
AAAGCAGCGTGTTTTTGCGGTTTA	2	AACCGCAAAAACACGCTGCTTTCT	3			AAAAAAATTGTTGCCGTTGG	4	AACGGCAACAATTTTTTTTG	19
AAACCTTCTTCTTAAACCGGTTGG	1	AACCGGTTTAAGAAGAAGGTTTGT	1			AAAAAAAATTGTTGCCGTTGG	34	AACGGCAACAATTTTTTTTGG	51
AAACAAATCAGTCACGGTTAA	1	AACCGTGACTGATTTGTTTCA	1			AAAGACTCAGTTTTATGCCGTTTA	1	AACGGCATAAAACTGAGTCTTTAA	1
AACATCGTCCGTGATTAGGTTGG	1	AACCTAATCACGGACGATGTTTT	1			AAATGCCAGTGGCAGCCGTTGT	1	AACGGCTGCCACTGGCATTTAA	1
AAAAGTGGTATGATCGGAGGTTTT	10	AACCTCCGATCATACCACTTTTTA	2			AACCGCTCGAAATCGCCCGTTTT	1	AACGGGCGATTTCGAGCGGTTTA	12
AAAACGTACCGTTGAGAGGTTGA	1	AACCTCTCAACGGTACGTTTTTA	4			AAAGTAGACAATCTTAACCGTTCA	1	AACGGTTAAGATTGTCTACTTTAG	1
AAAAACGTACCGTTGAGAGGTTGA	5	AACCTCTCAACGGTACGTTTTTAT	30			AAAAGTTTCATCTCTCCACGTTCC	1	AACGTGGAGAGATGAAACTTTTTT	3
AAAGCGCTCAACTGCAGAGGTTAC	1	AACCTCTGCAGTTGAGCGCTTTGA	1			AAATACCACTACTTTTAACGTTAT	1	AACGTTAAAAGTAGTGGTATTTCA	1
AACCTCATTGACCTGGCAGGTTCT	1	AACCTGCCAGGTCAATGAGGTTCT	1			AAATGGTAGTCAACGCTTAGTTCA	2	AACTAAGCGTTGACTACCATTTAA	1
AAATCTCCAACTCCAACAGGTTAA	1	AACCTGTTGGAGTTGGAGATTTGG	1			AAAGTGGTTTTGCAGATTAGTTGT	8	AACTAATCTGCAAAACCACTTTAG	2
AAAAACAAACGAAGGCAAGGTTCA	1	AACCTTGCCTTCGTTTGTTTTTGT	1			AACGATTGTATGAGCATTAGTTAT	1	AACTAATGCTCATACAATCGTTGT	1
AAAGATCAGCTGTTTCGTTCC	1	AACGAAACAGCTGATCTTTGT	2			AAAATCTATCTAGCTAGTTTT	1	AACTAGCTAGATAGATTTTTT	4
AACATGTAATATTAGTTTCGTTGT	2	AACGAAACTAATATTACATGTTGT	1			AAATACATGCATCAGAATAGTTAG	2	AACTATTCTGATGCATGTATTTTT	3
AAATAAATACCAAACTTTCGTTGA	1	AACGAAAGTTTGGTATTTATTTGG	1			AACGATCATTTCAATAGTTCA	1	AACTATTGAAATGATCGTTTT	3
AAATGTCGCTGTGTTGTTCGTTTG	1	AACGAACAACACAGCGACATTTAT	2			AAAGCTGAGAATCGAAATAGTTTA	8	AACTATTTCGATTCTCAGCTTTCA	1
AACACACCTACAGATTCGTTGG	1	AACGAATCTGTAGGTGTGTTAT	2			AAAATAACGTTACGGCTGAGTTAT	6	AACTCAGCCGTAACGTTATTTTAT	5
AAAATGGTCAGGGCATGTCGTTAT	1	AACGACATGCCCTGACCATTTTTT	1			AACATATTGCGTTCACGGAGTTAA	3	AACTCCGTGAACGCAATATGTTAA	1
AAAATTGCGGTCGCTGGTCGTTGG	9	AACGACCAGCGACCGCAATTTTTG	4			AAAGATGGTCTCATGTCGAGTTGT	1	AACTCGACATGAGACCATCTTTAT	4
AAAGCCAAAACTTACGGTCGTTAC	5	AACGACCGTAAGTTTTGGCTTTAG	5			AACCATTCCTGAAAAACGAGTTGG	2	AACTCGTTTTTCAGGAATGGTTGA	1
AAAGCCAAAAATAACGGTCGTTAC	1	AACGACCGTTATTTTTGGCTTTAG	4			AACGACCATTTCAAGAGTTCA	1	AACTCTTGAAATGGTCGTTTT	2
AACAGCTCAAAATGACGTCGTTTA	4	AACGACGTCATTTTGAGCTGTTAA	3			AACCGAATCAGCCGAAAGAGTTTA	1	AACTCTTTCGGCTGATTCGGTTAG	5
AACCATTCTAAACGACGTCGTTTT	1	AACGACGTCGTTTAGAATGGTTAA	3			AAAGACGATAGAGAAAAGAGTTGA	10	AACTCTTTTCTCTATCGTCTTTAT	1
AAAGTTGTACAGAACTATCGTTTT	1	AACGATAGTTCTGTACAACTTTGA	2			AACAGACGTTAGATAATCAGTTAA	33	AACTGATTATCTAACGTCTGTTAA	1
AAAACAGATAAAGGATTGCGTTAG	8	AACGCAATCCTTTATCTGTTTTCA	2			AAAACATATACAACTGGCAGTTTA	1	AACTGCCAGTTGTATATGTTTTGT	1
AAAATCGGACGTCTTCGGCGTTCG	1	AACGCCGAAGACGTCCGATTTTCA	1			AAAACATATACGACTCGCAGTTTA	1	AACTGCGAGTCGTATATGTTTTGT	1
AAAGGTGACCGACGCCGGCGTTGT	3	AACGCCGGCGTCGGTCACCTTTCT	2			AAAACATATACAACTCGCAGTTTA	5	AACTGCGAGTTGTATATGTTTTGT	8
AAAGAAGATGACGTGGAGCGTTAA	1	AACGCTCCACGTCATCTTCTTTTT	2			AACCGCTCGAAATCGCCAGTTTT	1	AACTGGCGATTTCGAGCGGTTTA	1
AAAAGATCCAAACTTAAGCGTTTT	1	AACGCTTAAGTTTGGATCTTTTAT	1			AAAGATATGGGTTACTACAGTTTT	3	AACTGTAGTAACCCATATCTTTGA	1
AAAGCTCCTTCCCGCAAGCGTTTG	2	AACGCTTGCGGGAAGGAGCTTTTA	6			AAAGATATGGGTTACTACAGTTTT	3	AACTGTAGTAACCCATATCTTTGG	1
AAAGCTCCTTCCCGCAAGCGTTTG	2	AACGCTTGCGGGAAGGAGCTTTTG	4			AACGGAATCGCTAACTACAGTTAA	2	AACTGTAGTTAGCGATTCCGTTAT	1
AACAGGTAATGTTAGTTCCGTTCC	1	AACGGAACTAACATTACCTGTTAT	8			AAAAACGATAAGCCGGACAGTTTG	2	AACTGTCCGGCTTATCGTTTTTGC	1
AACCGCAGTTAGAAGTTCCGTTAC	1	AACGGAACTTCTAACTGCGGTTAA	5			AACGAACAACACAGCGACAGTTAT	1	AACTGTCGCTGTGTTGTTCGTTTG	3
AAATTAGACCGCTTTGTCCGTTAC	1	AACGGACAAAGCGGTCTAATTTGT	29			AACGAACAACACAGAGACAGTTAT	2	AACTGTCTCTGTGTTGTTCGTTTG	1
AAATTAAGTCTAGGCCTCCGTTAT	1	AACGGAGGCCTAGACTTAATTTAT	4			AACATATACAACTCACAGTTTA	1	AACTGTGAGTTGTATATGTTTT	2
AAATGATATACTCCCTCCGTTTC	1	AACGGAGGGAGTATATCATTTAC	2			AAACATATACAACTCACAGTTTA	1	AACTGTGAGTTGTATATGTTTTA	49
AAATTGCAGGCCACATCCGTTGA	1	AACGGATGTGGCCTGCAATTTAC	2			AAACATATACAACTCACAGTTTA	1	AACTGTGAGTTGTATATGTTTTG	18
AAAAAAAATTGTTGCCGTTGG	15	AACGGCAACAATTTTTTTTGG	19			AAAACATATACAACTCACAGTTTA	16	AACTGTGAGTTGTATATGTTTTGT	102
AAACCCATAAAGACTTGCCGTTAC	3	AACGGCAAGTCTTTATGGGTTTTT	13			AAAACATATACAACTCACAGTTTA	16	AACTGTGAGTTGTATATGTTTTAT	1
AAAGACTCAGTTTTATGCCGTTTA	1	AACGGCATAAAACTGAGTCTTTAA	5			AACACAAGACAAAAAAACAGTTAT	4	AACTGTTTTTTTGTCTTGTGTTAC	1
AAATCTAATGAATGTGACCGTTAA	1	AACGGTCACATTCATTAGATTTTA	1			AAACAACGATTACTCTTAAGTTCT	5	AACTTAAGAGTAATCGTTGTTTAC	6
AAATAGTATAGATTGGACCGTTGA	3	AACGGTCCAATCTATACTATTTTT	2			AACCATTGGAGCATAATAAGTTAA	1	AACTTATTATGCTCCAATGGTTAG	1
AAAGTAGACAATCTTAACCGTTCA	6	AACGGTTAAGATTGTCTACTTTGA	2			AAATAGCCGCAAACAGAAGTTTT	2	AACTTCTGTTTGCGGCTATTTTT	1
AAAGTAGACAATCTTAACCGTTCA	6	AACGGTTAAGATTGTCTACTTTAG	1			AAAAGGGCATTAGAAAGAAGTTTT	4	AACTTCTTTCTAATGCCCTTTTCA	1
AAAGTAGACAATCTTAACCGTTCA	6	AACGGTTAAGATTGTCTACTTTGG	1			AAAGAGTTTAGGATGTCAAGTTTG	1	AACTTGACATCCTAAACTCTTTAT	1
AACCCTTAACTCATATACGTTCC	1	AACGTATATGAGTTAAGGGTTTA	4			AAAAATGGATCTGGCTAAAGTTGA	2	AACTTTAGCCAGATCCATTTTTAA	2
AAATTGGTGTAAGACAAACGTTAT	1	AACGTTTGTCTTACACCAATTTAA	1			AACGGGTCAGTCAACGAAAGTTAG	2	AACTTTCGTTGACTGACCCGTTAA	1
AAATCCGCCAATTAAAAACGTTAT	2	AACGTTTTTAATTGGCGGATTTGG	1			AAAGTTGGTTAGAGACAAAGTTAG	1	AACTTTGTCTCTAACCAACTTTGT	1
AAATGGCAGTCAACGTTTAGTTCA	4	AACTAAACGTTGACTGCCATTTAA	1			AAAAGTCGCCGGAAAAGTTTT	3	AACTTTTCCGGCGACTTTTCC	2
AAAAAGCAGTTGAGTTTAGTTTT	1	AACTAAACTCAACTGCTTTTTTA	1			AAATACGTGCATTCTTTTTCTTTC	1	AAGAAAAAGAATGCACGTATTTAA	2
AACACATATACTCTTCTTAGTTTT	1	AACTAAGAAGAGTATATGTGTTGT	1			AAAGCGTAAGTAGGGTTTTCTTGT	2	AAGAAAACCCTACTTACGCTTTTA	1
AAATGGTAGTCAACGCTTAGTTCA	4	AACTAAGCGTTGACTACCATTTAA	2			AACCCTTATATGCTACTTTCTTAA	1	AAGAAAGTAGCATATAAGGGTTGT	10
AAAAGATATGTATTTATTAGTTTA	1	AACTAATAAATACATATCTTTTTT	1			AACCCTTATATGCTACTTTCTTAA	1	AAGAAAGTAGCATATAAGGGTTGG	1
AACGATACTTTTTTGATTAGTTGG	2	AACTAATCAAAAAAGTATCGTTGA	1			AAATAACTACGACGACTTTCTTAT	1	AAGAAAGTCGTCGTAGTTATTTTC	1
AAAGTGGTTTTGCAGATTAGTTGT	2	AACTAATCTGCAAAACCACTTTAG	2			AAAACCCGTTCTGAACTTTCTTTA	1	AAGAAAGTTCAGAACGGGTTTTAT	2
AAAGTATGGGGGGAATGTAGTTGA	1	AACTACATTCCCCCCATACTTTCA	3			AAACTACCGCCGGAACTTTCTTAC	1	AAGAAAGTTCCGGCGGTAGTTTTT	8
AAATAGTTGTCGAAATCTAGTTCA	1	AACTAGATTTCGACAACTATTTAA	1			AACGCATCTAAATACATTTCTTAT	1	AAGAAATGTATTTAGATGCGTTTT	1
AAATAGTTCTCGAAATCTAGTTTA	1	AACTAGATTTCGAGAACTATTTAA	1			AAAACCCGTTCTGTAATTTCTTTA	1	AAGAAATTACAGAACGGGTTTTAT	11
AAATAGTTGCCGAAATCTAGTTTA	1	AACTAGATTTCGGCAACTATTTAA	9			AAAATGTGTACAGCTTCTTTG	1	AAGAAGCTGTACACATTTTAT	2
AAAAATCTATCTAGCTAGTTTT	2	AACTAGCTAGATAGATTTTTTG	2			AAAAACACTAACCAACCTTCTTCT	1	AAGAAGGTTGGTTAGTGTTTTTGA	1
AAAACAGATACAACTCATAGTTTA	1	AACTATGAGTTGTATCTGTTTTGT	1			AAACAAAAATAACCGACTTCTTAA	1	AAGAAGTCGGTTATTTTTGTTTTG	1
AAAATAAGCGTCCGGCATAGTTGG	2	AACTATGCCGGACGCTTATTTTTC	2			AAACAGCGACCAGATATTCTTGA	1	AAGAATATCTGGTCGCTGTTTAA	1
AACGGAGGAAAGATAATAGTTTA	1	AACTATTATCTTTCCTCCGTTCA	1			AAACTTAGAACAATCGAGTCTTCC	1	AAGACTCGATTGTTCTAAGTTTTG	1
AAATACATGCATCAGAATAGTTAG	3	AACTATTCTGATGCATGTATTTTT	1			AAATCTCTGGTTTTGCAGTCTTGT	1	AAGACTGCAAAACCAGAGATTTCC	29
AAAGCTGAGAATCGAAATAGTTTA	5	AACTATTTCGATTCTCAGCTTTCA	1			AAGACCGAAATTAGTTCTCTTGA	3	AAGAGAACTAATTTCGGTCTTAG	1
AAATATAGGTTACGGCTGAGTTAT	1	AACTCAGCCGTAACCTATATTTCA	1			AACCTTTTCGGTCCCGTCTCTTGA	2	AAGAGACGGGACCGAAAAGGTTAA	3
AAAATAACGTTACGGCTGAGTTAT	1	AACTCAGCCGTAACGTTATTTTAT	10			AAAAACGACAGCGGTCTCTCTTAA	1	AAGAGAGACCGCTGTCGTTTTTGA	2
AAACACTTTTATGATGAGTTTA	1	AACTCATCATAAAAGTGTTTAT	1			AAAACAGAATCCGTGTGCTCTTGC	1	AAGAGCACACGGATTCTGTTTTTC	9
AACCTGAAGATGAAGATGAGTTGT	22	AACTCATCTTCATCTTCAGGTTCA	1			AAGACGATACAAGTTGGCTCTTTC	3	AAGAGCCAACTTGTATCGTCTTCT	3
AACCCATGAATTCTAATGAGTTGA	1	AACTCATTAGAATTCATGGGTTGA	1			AACAAAAACGCATCCCACTCTTAT	2	AAGAGTGGGATGCGTTTTTGTTAC	3
AACATATTGCGTTCACGGAGTTAA	3	AACTCCGTGAACGCAATATGTTAA	1			AAAGCATAAACCATAAACTCTTAA	37	AAGAGTTTATGGTTTATGCTTTGA	3
AAAGATGGTCTCATGTCGAGTTGT	8	AACTCGACATGAGACCATCTTTAT	6			AAGAAACCGTTTAAAAACTCTTGT	2	AAGAGTTTTTAAACGGTTTCTTAT	1
AAAAAGTCAGGGTTATCGAGTTAG	1	AACTCGATAACCCTGACTTTTTAG	1			AACGAACAAAGTAGGTTATCTTAT	4	AAGATAACCTACTTTGTTCGTTGC	12
AACCCACAATCTGCGACGAGTTTA	3	AACTCGTCGCAGATTGTGGGTTGC	1			AAGACCGGGGATGGTGTATCTTTA	1	AAGATACACCATCCCCGGTCTTAG	2
AAAAGCTAGCTCAAGAGTTGA	1	AACTCTTGAGCTAGCTTTTGG	1			AACATCTTCGTTGGAATATCTTAT	1	AAGATATTCCAACGAAGATGTTCT	1
AACCGAATCAGCCGAAAGAGTTTA	1	AACTCTTTCGGCTGATTCGGTTAG	5			AAGATAAGTTAGAGAATATCTTAA	1	AAGATATTCTCTAACTTATCTTAA	1
AAAGACGATAGAGAAAAGAGTTGA	2	AACTCTTTTCTCTATCGTCTTTAT	1			AAAACATTTCCCAGAATATCTTCA	1	AAGATATTCTGGGAAATGTTTTTT	1
AACAGTTTACCGCGTCAGTTAA	1	AACTGACGCGGTAAACTGTTAT	5			AAAAGTTAACTCGGTCATCTTTT	1	AAGATGACCGAGTTAACTTTTCA	1
AACAGACGTTAGATAATCAGTTAA	36	AACTGATTATCTAACGTCTGTTAA	2			AAATAACTGGAGTCCTCATCTTAG	3	AAGATGAGGACTCCAGTTATTTGG	3
AAAACATATACAACTCGCAGTTTA	9	AACTGCGAGTTGTATATGTTTTGT	5			AACCAATCAAGTTTTACATCTTAT	1	AAGATGTAAAACTTGATTGGTTAA	1
AAATTATCTAGTTATGCCAGTTGA	5	AACTGGCATAACTAGATAATTTAA	11			AAAAGATATTCTCCTACATCTTAG	1	AAGATGTAGGAGAATATCTTTTTT	1
AAACGCACCGCATTGTACAGTTCG	1	AACTGTACAATGCGGTGCGTTTCA	10			AAACTACAAGTGTATAATCTTAA	1	AAGATTATACACTTGTAGTTTGA	7
AACGAACAACACTTTGACAGTTAT	2	AACTGTCAAAGTGTTGTTCGTTTG	1			AAAAGTTGGGATACATAATCTTTA	1	AAGATTATGTATCCCAACTTTTAT	1
AAAAACGATAAGCCGGACAGTTTG	2	AACTGTCCGGCTTATCGTTTTTGC	2			AACGATCCCTAAGGCGAATCTTGA	1	AAGATTCGCCTTAGGGATCGTTGT	1
AACGAACAACACAGCGACAGTTAT	1	AACTGTCGCTGTGTTGTTCGTTTG	2			AAGACATAGACGTTCAAATCTTTC	3	AAGATTTGAACGTCTATGTCTTCC	2
AAACGTATACAACTCACAGTTTA	1	AACTGTGAGTTGTATACGTTTTG	1			AACAGACACGACTTATTGCTTCA	2	AAGCAATAAGTCGTGTCTGTTTC	1
AAACATATACAACTCACAGTTTA	1	AACTGTGAGTTGTATATGTTTTA	35			AAACAGACACGACTTATTGCTTCA	1	AAGCAATAAGTCGTGTCTGTTTCC	5
AAACATATACAACTCACAGTTTA	1	AACTGTGAGTTGTATATGTTTTG	8			AACTCCGCAGTTAAGCGTGCTTGG	1	AAGCACGCTTAACTGCGGAGTTCT	1
AAAACATATACAACTCACAGTTTA	12	AACTGTGAGTTGTATATGTTTTGT	72			AACTCTACAGTTAAGCGTGCTTGG	1	AAGCACGCTTAACTGTAGAGTTTT	1
AAACAACGATTACTCTTAAGTTCT	1	AACTTAAGAGTAATCGTTGTTTAC	2			AAATGACCGCTACACTGCTTAT	31	AAGCAGTGTAGCGGTCATTTAA	3
AAATGTAAAAGCGGATAAGTTGG	13	AACTTATCCGCTTTTACATTTGC	1			AACGAGTTAGCTAACTATGCTTTT	1	AAGCATAGTTAGCTAACTCGTTGG	8
AACCATTGGAGCATAATAAGTTAA	4	AACTTATTATGCTCCAATGGTTAG	1			AACAAAATAAGGAATGCTTCT	9	AAGCATTCCTTATTTTGTTCC	3
AACGCAGGCGGCGGCTGAAGTTTT	1	AACTTCAGCCGCCGCCTGCGTTTA	1			AACGTCGTGTAGATTTTGGCTTGA	5	AAGCCAAAATCTACACGACGTTAT	5
AAAAATAGACGACTTCGAAGTTTG	1	AACTTCGAAGTCGTCTATTTTTAC	1			AAAGAGAAGGCACTTTGGCTTGT	1	AAGCCAAAGTGCCTTCTCTTTTG	1
AAACGGCCGCATACGAAGTTGA	4	AACTTCGTATGCGGCCGTTTAA	2			AAAAGAGAAGGCACTTTGGCTTGT	4	AAGCCAAAGTGCCTTCTCTTTTGA	1
AAAAGGTATCACATGCCAAGTTTG	3	AACTTGGCATGTGATACCTTTTCG	2			AACGATGTGTCTTAATTGGCTTAG	1	AAGCCAATTAAGACACATCGTTAG	6
AAAAAAGAAGACGATACAAGTTGG	1	AACTTGTATCGTCTTCTTTTTTTT	1			AACGATGTGTCTTAATTGGCTTAG	1	AAGCCAATTAAGACACATCGTTAA	1
AAACATGCTTAACTGTAAAGTTTT	2	AACTTTACAGTTAAGCATGTTTGT	1			AAGAGAAATGTAATGATGGCTTGT	4	AAGCCATCATTACATTTCTCTTCT	1
AAATGGCCATTTTTTGAAAGTTGG	1	AACTTTCAAAAAATGGCCATTTTA	1			AAAATATAGGGTCTTTGGGCTTGA	3	AAGCCCAAAGACCCTATATTTTCT	1
AAAAGGTTGATGTGTCAAAGTTAG	1	AACTTTGACACATCAACCTTTTTA	1			AAAAAAGTAGATTTATGGGCTTAA	4	AAGCCCATAAATCTACTTTTTTTA	1
AAAAGGCTGATGTGTCAAAGTTAC	4	AACTTTGACACATCAGCCTTTTTG	1			AACGGCAGCCTCTAAGGGGCTTTT	1	AAGCCCCTTAGAGGCTGCCGTTGG	1
AAAATGGATCTGGCCAAAGTTGA	1	AACTTTGGCCAGATCCATTTTTA	4			AAAAATCTCTGGTCGCGGGCTTAG	4	AAGCCCGCGACCAGAGATTTTTAA	1
AAAAATGGATCTGGCCAAAGTTGA	18	AACTTTGGCCAGATCCATTTTTAA	3			AAAAATTCCTGGTCGCGGGCTTAA	14	AAGCCCGCGACCAGGAATTTTTAA	1
AAAAATGGATCCGGCCAAAGTTGA	2	AACTTTGGCCGGATCCATTTTTAA	4			AAATCATGTATTCCGCCGGCTTTA	1	AAGCCGGCGGAATACATGATTTCC	1
AACAAACTGTAAGCAAAAAGTTAC	2	AACTTTTTGCTTACAGTTTGTTTC	1			AACGATCAAAATAAACCGGCTTAA	1	AAGCCGGTTTATTTTGATCGTTTA	1
AAATGACACATGATATTTTCTTAT	1	AAGAAAATATCATGTGTCATTTAA	1			AACCGATAGCGAGGAAGGCTTTT	1	AAGCCTTCCTCGCTATCGGTTTA	3
AACTTGACGATTAGGGTTTCTTCT	1	AAGAAACCCTAATCGTCAAGTTGA	3			AAACCGATAGCGAGGAAGGCTTTT	9	AAGCCTTCCTCGCTATCGGTTTAT	1
AACGCATCTAAATACATTTCTTAT	5	AAGAAATGTATTTAGATGCGTTTT	1			AAAAGTTCAGGTCCAAAGGCTTTA	1	AAGCCTTTGGACCTGAACTTTTAA	1
AAAACACGTTCTGTAATTTCTTTA	1	AAGAAATTACAGAACGTGTTTTAT	3			AACCGGAACTCCCATCTCGCTTCT	3	AAGCGAGATGGGAGTTCCGGTTGA	13
AAACCGTAACGAAGATGTTCTTGG	1	AAGAACATCTTCGTTACGGTTTGC	2			AAAGGATCGATAGGCCACGCTTTC	3	AAGCGTGGCCTATCGATCCTTTAG	5
AAAATATACTCCTTCGGTTCTTAG	1	AAGAACCGAAGGAGTATATTTTAA	2			AACAAAAAGAACGACGGAGCTTCA	9	AAGCTCCGTCGTTCTTTTTGTTAT	1
AACTTCTTTTTGTGTCTTCTTGC	1	AAGAAGACACAAAAAGAAGTTCC	1			AACGCTTGCGGGAAGGAGCTTTT	2	AAGCTCCTTCCCGCAAGCGTTTA	2
AAAATGCGCCAAACCTCTTCTTGT	1	AAGAAGAGGTTTGGCGCATTTTCA	1			AAACGCTTGCGGGAAGGAGCTTTT	5	AAGCTCCTTCCCGCAAGCGTTTGC	1
AAAGTAGATGATGCTTCTTCG	2	AAGAAGCATCATCTACTTTGT	1			AAATTATTTCGATTCTCAGCTTTC	1	AAGCTGAGAATCGAAATAATTTAT	141
AAACCGCAGACGTTTGATTCTTGG	3	AAGAATCAAACGTCTGCGGTTTAG	1			AAACTATTTCGATTCTCAGCTTTC	2	AAGCTGAGAATCGAAATAGTTTAT	600
AAACCAGATTGTTGTTGTCTTTA	3	AAGACAACAACAATCTGGTTTTA	1			AAAAGTGTTTTACTCTCAGCTTTT	2	AAGCTGAGAGTAAAACACTTTTTG	1
AAATCAAACACATCCTTGTCTTCA	1	AAGACAAGGATGTGTTTGATTTTT	1			AAAAAGTTTTACTCTCAGCTTTA	2	AAGCTGAGAGTAAAACTTTTTGT	2
AAATAATAAATGGATGTGTCTTAA	1	AAGACACATCCATTTATTATTTTC	2			AAAAAGTTTTACTCTCAGCTTTA	2	AAGCTGAGAGTAAAACTTTTTAT	1
AAATTAGGGGTAAAAATGTCTTAA	1	AAGACATTTTTACCCCTAATTTAA	1			AACGGTCTGCTCTTTTTTCCTTCA	1	AAGGAAAAAAGAGCAGACCGTTAA	61
AAAGTCCTTTCAAACTCGTCTTAC	1	AAGACGAGTTTGAAAGGACTTTAC	1			AAGCAACCTAGTTCTTTTCCTTTG	1	AAGGAAAAGAACTAGGTTGCTTAA	7
AAAGCATAATTTTATCGTCTTTA	15	AAGACGATAAAATTATGCTTTAG	1			AAGCCTAAGTAGTGTTTCCTTGT	5	AAGGAAACACTACTTAGGCTTTT	3
AAAGTTTCACATTATCGTCTTCA	5	AAGACGATAATGTGAAACTTTTA	1			AAGCCTAAGTAGTGTTTCCTTGT	5	AAGGAAACACTACTTAGGCTTTA	1
AACCTAATTTTGCGGCCGTCTTTA	1	AAGACGGCCGCAAAATTAGGTTTG	1			AAGCCTAAGTAGTGTTTCCTTGT	5	AAGGAAACACTACTTAGGCTTAT	1
AACGTCCTGCCAAACCCGTCTTGT	1	AAGACGGGTTTGGCAGGACGTTAC	2			AAGCCTAAGTAGTGTTTCCTTTA	1	AAGGAAACACTACTTAGGCTTTT	3
AAATTTAGGATACAGTCTTTA	1	AAGACTGTATCCTAAATTTCT	2			AAGCCTAAGTAGTGTTTCCTTTA	1	AAGGAAACACTACTTAGGCTTTA	1
AACACTTTTAGGTTTCTCTCTTTG	1	AAGAGAGAAACCTAAAAGTGTTAA	1			AAGCCTAAGTAGTGTTTCCTTTA	1	AAGGAAACACTACTTAGGCTTAT	1
AACCAAAAGCCCTACATCTCTTTC	1	AAGAGATGTAGGGCTTTTGGTTTG	1			AAAGCCTAAGTAGTGTTTCCTTGT	1	AAGGAAACACTACTTAGGCTTTTA	98
AAGACGATACAAGTTGGCTCTTTC	5	AAGAGCCAACTTGTATCGTCTTCT	6			AAAGCCTAAGTAGTGTTTCCTTGT	1	AAGGAAACACTACTTAGGCTTTTT	4
AAAGACCGTTTTACCCCTCTTGT	1	AAGAGGGGTAAAACGGTCTTTGA	4			AAAGCCTAAGTAGTGTTTCCTTGT	1	AAGGAAACACTACTTAGGCTTTCA	1
AAAGCATAAACCATAAACTCTTAA	28	AAGAGTTTATGGTTTATGCTTTGA	3			AAAGCCTAAGTAGTGTTTCCTTGT	1	AAGGAAACACTACTTAGGCTTTGA	1
AACGAACAAAGTAGGTTATCTTAT	4	AAGATAACCTACTTTGTTCGTTGC	14			AACCGCCTGGTCCAATGTCCTTAG	1	AAGGACATTGGACCAGGCGGTTAT	1
AAATCCTCCCCATCTTGATCTTCA	1	AAGATCAAGATGGGGAGGATTTAA	1			AACTTGCCACGTAGGGGTCCTTAG	1	AAGGACCCCTACGTGGCAAGTTGC	2
AAATAACTGGAGTCCTCATCTTAG	4	AAGATGAGGACTCCAGTTATTTGG	12			AACAGACAGTATGGTAGTCCTTCG	42	AAGGACTACCATACTGTCTGTTCT	1
AACTTGTCATTTTTCGCATCTTAA	2	AAGATGCGAAAAATGACAAGTTGG	9			AACAGACAGTATGGTAGTCCTTAA	2	AAGGACTACCATACTGTCTGTTCT	1
AAACTCTCCAGGGATCCATCTTTA	1	AAGATGGATCCCTGGAGAGTTTGA	1			AACGACCCAGAAAGCCTCCTTGG	5	AAGGAGGCTTTCTGGGTCGTTAA	2
AAACTCCCCAGAGATCCATCTTTA	1	AAGATGGATCTCTGGGGAGTTTGA	1			AAAGTGAACTCTCTCCCTCCTTAT	1	AAGGAGGGAGAGAGTTCACTTTCT	2
AAAACAAAACAGAGTACATCTTGA	1	AAGATGTACTCTGTTTTGTTTTCT	1			AACATTTACTTATTTACTCCTTCA	2	AAGGAGTAAATAAGTAAATGTTTA	2
AAAACAAAACAGAGTACATCTTGA	1	AAGATGTACTCTGTTTTGTTTTAT	1			AAACAGTCGCAGCGACTCCTTTT	1	AAGGAGTCGCTGCGACTGTTTTA	1
AAATTTGGGACGATTTAATCTTGA	1	AAGATTAAATCGTCCCAAATTTGA	2			AAGCCTAAGTAGTGTATCCTTGT	1	AAGGATACACTACTTAGGCTTTT	1
AACTAATATATTTGCTAATCTTAT	1	AAGATTAGCAAATATATTAGTTAG	1			AAGCGTGGCCTATCGATCCTTTA	16	AAGGATCGATAGGCCACGCTTTC	3
AAACTACAAGTGTATAATCTTAA	1	AAGATTATACACTTGTAGTTTGA	9			AAATCTGTGTTGTCCGATCCTTAA	1	AAGGATCGGACAACACAGATTTTA	1
AACGTCTGTTTTCTTCAATCTTCA	1	AAGATTGAAGAAAACAGACGTTGA	2			AAAAAGTATGTAGCAATCCTTTA	2	AAGGATTGCTACATACTTTTTAT	3
AAACGGTGAGAGGGACAATCTTGG	11	AAGATTGTCCCTCTCACCGTTTGA	4			AACCTGATATAGGTCCCGCCTTTA	3	AAGGCGGGACCTATATCAGGTTAA	2
AAACACGCTCTTCTCAAATCTTCT	1	AAGATTTGAGAAGAGCGTGTTTAG	2			AAGGATACAATTCTTACGCCTTTA	5	AAGGCGTAAGAATTGTATCCTTGT	6
AAACTTGTGCTCTAAAAATCTTAC	1	AAGATTTTTAGAGCACAAGTTTGA	26			AAAGAATTGAGAGAATAGCCTTGT	2	AAGGCTATTCTCTCAATTCTTTTC	2
AAACAGACACGACTTATTGCTTCA	2	AAGCAATAAGTCGTGTCTGTTTCC	9			AACACTTTAGATCTCATCCCTTGC	1	AAGGGATGAGATCTAAAGTGTTGA	3
AACACAACACAGAGAATTGCTTAT	1	AAGCAATTCTCTGTGTTGTGTTGA	1			AAACTTTGCACCTAATCCCTTGG	1	AAGGGATTAGGTGCAAAGTTTAT	1
AACTCCGTAGTTAAGCGTGCTTGG	1	AAGCACGCTTAACTACGGAGTTCT	2			AAAACCCTTTTAAAATCCCTTGT	1	AAGGGATTTTAAAAGGGTTTTAA	2
AACTCTGCAGTTAAGCGTGCTTGG	1	AAGCACGCTTAACTGCAGAGTTCT	3			AAAACCCTTTTAAAATCCCTTGT	1	AAGGGATTTTAAAAGGGTTTTAC	1
AAGATTGACGTGACGCTGCTTAA	1	AAGCAGCGTCACGTCAATCTTCA	6			AAAACCCTTTTAAAATCCCTTGT	1	AAGGGATTTTAAAAGGGTTTTAT	1
AACCGCAAAAACACGCTGCTTTC	1	AAGCAGCGTGTTTTTGCGGTTTA	3			AACAAACAGTGTAGTGGCCCTTTT	3	AAGGGCCACTACACTGTTTGTTCT	2
AAGAGATTAGGTCATCCTGCTTAT	1	AAGCAGGATGACCTAATCTCTTAT	2			AAACCCTTAACCCTAAACCCTTAA	1	AAGGGTTTAGGGTTAAGGGTTTAG	1
AAATGACCGCTACACTGCTTAT	13	AAGCAGTGTAGCGGTCATTTAA	1			AAGATCTCTCCCAACGTACCTTGA	2	AAGGTACGTTGGGAGAGATCTTTT	2
AAAGTTGGTGAAACTCATGCTTTA	1	AAGCATGAGTTTCACCAACTTTAG	2			AAACTTGGCATGTGATACCTTTT	4	AAGGTATCACATGCCAAGTTTGG	1
AACAAAATAAGGAATGCTTCT	10	AAGCATTCCTTATTTTGTTCC	2			AAACTTGGCATGTGATACCTTTA	2	AAGGTATCACATGCCAAGTTTGG	1
AACGTCGTGTAGATTTTGGCTTGA	1	AAGCCAAAATCTACACGACGTTAT	5			AAATAACATAACTACATACCTTAT	1	AAGGTATGTAGTTATGTTATTTAT	2
AAAAGAGAAGGCACTTTGGCTTGT	6	AAGCCAAAGTGCCTTCTCTTTTGG	1			AAAAGTCGTCTGCATGACCTTCA	1	AAGGTCATGCAGACGACTTTTGT	2
AACGATGTGTCTTAATTGGCTTAG	2	AAGCCAATTAAGACACATCGTTAG	1			AACTTTAATCGTTTCAGACCTTAG	1	AAGGTCTGAAACGATTAAAGTTGA	2
AACGATGTGTCTTAATTGGCTTAG	2	AAGCCAATTAAGACACATCGTTAA	1			AAGGCACATCCCCGATTGTACTTGA	1	AAGTACAATCGGGGATGTGCCTTTA	3
AAGAGAAATGTAATGATGGCTTGT	1	AAGCCATCATTACATTTCTCTTCT	1			AAATTCAAATTTTGTCGTACTTGT	1	AAGTACGACAAAATTTGAATTTGA	1
AAAAAGTAGATGTATGGGCTTAA	1	AAGCCCATACATCTACTTTTTCT	4			AAATATGAAGATTCCAGTACTTAG	3	AAGTACTGGAATCTTCATATTTGT	9
AAAACATGTAGATGATGGGCTTAG	22	AAGCCCATCATCTACATGTTTTTA	2			AAATGCCCGAAAAAGTACTTAA	1	AAGTACTTTTTCGGGCATTTTC	23
AAAATGGGCTATACATGGGCTTGC	1	AAGCCCATGTATAGCCCATTTTAT	1			AAATGCCCGAAAAAGTACTTAA	1	AAGTACTTTTTCGGGCATTTTT	4
AACAAATCTTTGCGGGCTTGA	1	AAGCCCGCAAAGATTTGTTAT	1			AAGGCGCTACCTACTGCTACTTTC	1	AAGTAGCAGTAGGTAGCGCCTTGG	5
AAAAATCTCTGGTCGCGGGCTTAG	2	AAGCCCGCGACCAGAGATTTTTAA	1			AAGCGCCCTACTTTACCTACTTGA	4	AAGTAGGTAAAGTAGGGCGCTTAG	23
AAATAGATGACTTTGAGGGCTTTT	1	AAGCCCTCAAAGTCATCTATTTAT	1			AAACAGTGAAAAGTGACTACTTTG	1	AAGTAGTCACTTTTCACTGTTTGA	2
AACGATCAAAATAAACCGGCTTAA	1	AAGCCGGTTTATTTTGATCGTTTA	6			AACGAACAGAGGCGATACTTGA	3	AAGTATCGCCTCTGTTCGTTGT	1
AACCATTGAACCAAGGAGGCTTTC	15	AAGCCTCCTTGGTTCAATGGTTGA	2			AAAAGCAGATCTCACATACTTTT	3	AAGTATGTGAGATCTGCTTTTTT	2
AACCGATAGCGAGGAAGGCTTTT	1	AAGCCTTCCTCGCTATCGGTTTA	4			AAAAAGCAGATCTCACATACTTTT	2	AAGTATGTGAGATCTGCTTTTTTG	4
AACCGGAACTCCCATCTCGCTTCT	3	AAGCGAGATGGGAGTTCCGGTTGA	5			AAACCCTCAATTCCTAATACTTAT	1	AAGTATTAGGAATTGAGGGTTTGG	1
AAAAAAGGACAGAAATCCGCTTGA	1	AAGCGGATTTCTGTCCTTTTTTAT	1			AAAAATCCGATCGTTTGACTTGA	1	AAGTCAAACGATCGGATTTTTAC	2
AAAATATTCATTTTACCCGCTTAA	1	AAGCGGGTAAAATGAATATTTTAT	1			AAAGGAGAAGGCACTTTGACTTGT	4	AAGTCAAAGTGCCTTCTCCTTTGG	1
AAAGGATCGATAGGCCACGCTTTC	2	AAGCGTGGCCTATCGATCCTTTAG	24			AACGATATGCCTTAACTGACTTAA	2	AAGTCAGTTAAGGCATATCGTTAA	1
AAAGAAGACCCTTTTGAGCTTGA	1	AAGCTCAAAAGGGTCTTCTTTCC	1			AACAACACAGAGAATTCACTTGC	1	AAGTGAATTCTCTGTGTTGTTTT	2
AAAAAGTATGTTCGCGGAGCTTGA	1	AAGCTCCGCGAACATACTTTTTCT	3			AAACAACACAGAGAATTCACTTGC	34	AAGTGAATTCTCTGTGTTGTTTTT	3
AAACGCTTGCGGGAAGGAGCTTTT	4	AAGCTCCTTCCCGCAAGCGTTTGC	5			AAAGGATTAGATAAATTCACTTCT	4	AAGTGAATTTATCTAATCCTTTAA	1
AAATTATTTCGATTCTCAGCTTTC	1	AAGCTGAGAATCGAAATAATTTAT	91			AAGATGTGTCTATGTGTCACTTCC	3	AAGTGACACATAGACACATCTTAG	1
AAACTATTTCGATTCTCAGCTTTC	1	AAGCTGAGAATCGAAATAGTTTAT	411			AAATTCAAATTCCGTCGCACTTGT	1	AAGTGCGACGGAATTTGAATTTGT	3
AACTAGGATGGGACTCCAGCTTTT	1	AAGCTGGAGTCCCATCCTAGTTAC	2			AAGATATTTACGGATTCCACTTTT	1	AAGTGGAATCCGTAAATATCTTAA	3
AAATAGGATGAAATCCCAGCTTCT	1	AAGCTGGGATTTCATCCTATTTGC	1			AAGCTGCACAGATTTCCCACTTTG	1	AAGTGGGAAATCTGTGCAGCTTAA	12
AACAGTTTTGTCAACACAGCTTAT	1	AAGCTGTGTTGACAAAACTGTTAT	4			AAAACCTCCGATCATACCACTTTT	1	AAGTGGTATGATCGGAGGTTTTGT	5
AAAATGGTGACATAACAGCTTTT	1	AAGCTGTTATGTCACCATTTTCG	1			AAAAATACACAGCGTACACTTTA	5	AAGTGTACGCTGTGTATTTTTTA	2
AAAGATTATAGACAAAAAGCTTAC	1	AAGCTTTTTGTCTATAATCTTTGC	1			AAAAAATACACAGCGTACACTTTA	3	AAGTGTACGCTGTGTATTTTTTAT	2
AACGGTCTGCTCTTTTTTCCTTCA	2	AAGGAAAAAAGAGCAGACCGTTAA	44			AACAAGCAGCCGATTAACACTTTC	2	AAGTGTTAATCGGCTGCTTGTTGG	3
AAACATCCTAATTATTTTCCTTTG	1	AAGGAAAATAATTAGGATGTTTGA	1			AAAAAACTCTCTCAAAACACTTAA	1	AAGTGTTTTGAGAGAGTTTTTTAG	2
AAGCCTAAGTAGTGTTTCCTTGT	2	AAGGAAACACTACTTAGGCTTTT	3			AAGGACAGATTGGAGTTAACTTTT	30	AAGTTAACTCCAATCTGTCCTTGA	39
AAGCCTAAGTAGTGTTTCCTTGT	2	AAGGAAACACTACTTAGGCTTAT	1			AAAAATATGACGGAGTTAACTTTT	1	AAGTTAACTCCGTCATATTTTTGT	1
AAAGCCTAAGTAGTGTTTCCTTGT	2	AAGGAAACACTACTTAGGCTTTTA	89			AACCAGAACTGCTCTATAACTTTC	13	AAGTTATAGAGCAGTTCTGGTTAT	10
AAAGCCTAAGTAGTGTTTCCTTGT	2	AAGGAAACACTACTTAGGCTTTAA	2			AACTTTATGACTCTATAACTTCT	10	AAGTTATAGAGTCATAAAGTTTT	2
AAAGCCTAAGTAGTGTTTCCTTGT	2	AAGGAAACACTACTTAGGCTTTTC	1			AAACTTTATGACTCTATAACTTCT	10	AAGTTATAGAGTCATAAAGTTTTA	1
AAAGCCTAAGTAGTGTTTCCTTGT	2	AAGGAAACACTACTTAGGCTTTTT	1			AAAATGTATGACTCTATAACTTTT	1	AAGTTATAGAGTCATACATTTTTC	1
AAAGCCTAAGTAGTGTTTCCTTAC	1	AAGGAAACACTACTTAGGCTTTTA	89			AAAATGTATGACTCTATAACTTTT	1	AAGTTATAGAGTCATACATTTTTA	1
AAAGCCTAAGTAGTGTTTCCTTAC	1	AAGGAAACACTACTTAGGCTTTAA	2			AAACTTTATGACTCCATAACTTTT	24	AAGTTATGGAGTCATAAAGTTTTA	1
AAAGCCTAAGTAGTGTTTCCTTAC	1	AAGGAAACACTACTTAGGCTTTTC	1			AAAGACGAAATCAAATGAACTTAA	2	AAGTTCATTTGATTTCGTCTTTCT	2
AAAGCCTAAGTAGTGTTTCCTTAC	1	AAGGAAACACTACTTAGGCTTTTT	1			AAAACTGTCTACTCTCCAACTTAT	1	AAGTTGGAGAGTAGACAGTTTTTG	1
AAAAGCCTAAGTAGTGTTTCCTTGT	1	AAGGAAACACTACTTAGGCTTTTAA	7			AACTAGTCACTTTTTTAAACTTAA	1	AAGTTTAAAAAAGTGACTAGTTTA	1
AAAAGCCTAAGTAGTGTTTCCTTGT	1	AAGGAAACACTACTTAGGCTTTTAT	1			AACCAGAATTCGATTGAAACTTGT	4	AAGTTTCAATCGAATTCTGGTTAT	1
AAAAGCCTAAGTAGTGTTTCCTTGT	1	AAGGAAACACTACTTAGGCTTTTAG	1			AACGGCCCAGTCAACGAAACTTAC	1	AAGTTTCGTTGACTGGGCCGTTTA	9
AAAAGCCTAAGTAGTGTTTCCTTGT	1	AAGGAAACACTACTTAGGCTTTTGA	1			AACTTTTCCCACAAACTTGA	1	AAGTTTGTGGGAAAAGTTTG	24
AAAGAGCCGGTTCAGTTTCCTTAA	1	AAGGAAACTGAACCGGCTCTTTAC	8			AAACTTTTCCCACAAACTTGA	2	AAGTTTGTGGGAAAAGTTTGT	30
AAACATGTTACACATATTCCTTGC	1	AAGGAATATGTGTAACATGTTTGG	1			AAAGCCAGGATGCAAGTTTATTGA	1	AATAAACTTGCATCCTGGCTTTAT	3
AAACATGCTACACATATTCCTTAC	1	AAGGAATATGTGTAGCATGTTTGG	7			AAACTTGCATCCTGGCTTTATTCA	2	AATAAAGCCAGGATGCAAGTTTAT	4
AAAAACGACATAGATTCCTTAT	1	AAGGAATCTATGTCGTTTTTGA	2			AAAGAGCCCGGTATTGTTATTTA	4	AATAACAATACCGGGCTCTTTCG	1
AAACCCACCGATCAATGTCCTTCC	1	AAGGACATTGATCGGTGGGTTTAT	1			AAAAGCTGCAGTAACTGTTATTAT	2	AATAACAGTTACTGCAGCTTTTTC	3
AACCTTTTGTAAAAATGTCCTTTC	1	AAGGACATTTTTACAAAAGGTTAT	3			AACAGAACAACTGATCGTTATTCC	10	AATAACGATCAGTTGTTCTGTTGA	1
AAGCAACTTTGTTCTTCTCCTTTG	2	AAGGAGAAGAACAAAGTTGCTTGA	170			AACAGAACAACTGATCGTTATTTC	2	AATAACGATCAGTTGTTCTGTTGA	1
AACAGCATCTTGTTATCTCCTTCA	2	AAGGAGATAACAAGATGCTGTTTA	5			AACAGAGGGCATTTTAGTTATTTA	5	AATAACTAAAATGCCCTCTGTTAA	1
AACAGCATCTTGTTATCTCCTTCA	2	AAGGAGATAACAAGATGCTGTTTG	2			AAAGGAGAATGTATCAGTTATTGA	1	AATAACTGATACATTCTCCTTTCG	1
AACGACCCAGAAAGCCTCCTTGG	3	AAGGAGGCTTTCTGGGTCGTTAA	3			AACAGCTATCACCTATATTATTAC	6	AATAATATAGGTGATAGCTGTTAG	1
AACATTTACTTATTTACTCCTTCA	3	AAGGAGTAAATAAGTAAATGTTTA	6			AAATGGAGACGACCTGATTATTCT	5	AATAATCAGGTCGTCTCCATTTCT	5
AAGCCTAAGTAGTGTATCCTTGT	1	AAGGATACACTACTTAGGCTTAC	1			AAATCCTTGTAAAATCATTATTAA	1	AATAATGATTTTACAAGGATTTTT	1
AAGCCTAAGTAGTGTATCCTTGT	1	AAGGATACACTACTTAGGCTTTT	1			AACATCCTATTATCTTTGTATTTG	1	AATACAAAGATAATAGGATGTTAA	2
AAAGCCTAAGTAGTGTATCCTTGT	1	AAGGATACACTACTTAGGCTTTTA	7			AAGTGGCATGTCTTGTTGTATTTC	2	AATACAACAAGACATGCCACTTAT	2
AAAGCGTGGCCTATCGATCCTTTA	3	AAGGATCGATAGGCCACGCTTTCA	2			AAGTACTCAGGCCGTCTGTATTTC	4	AATACAGACGGCCTGAGTACTTTC	1
AAACATTAAGATTATGTGCCTTCA	1	AAGGCACATAATCTTAATGTTTAT	1			AAAGCCTAAAGATCAATGTATTGT	2	AATACATTGATCTTTAGGCTTTAA	2
AAGATTTCTAACGATGTGCCTTAA	1	AAGGCACATCGTTAGAAATCTTTC	1			AAATACGCGACGGGGTATTGT	19	AATACCCCGTCGCGTATTTAA	9
AACCTGATATAGGTCCCGCCTTTA	2	AAGGCGGGACCTATATCAGGTTAA	2			AATACCCCGTCGCGTATTTA	1	AATACGCGACGGGGTATTGT	10
AAGGATACAATTCTTACGCCTTTA	5	AAGGCGTAAGAATTGTATCCTTGT	4			AACACAATCCCTTTTCAGTATTGC	1	AATACTGAAAAGGGATTGTGTTGA	1
AACACTTTAGATCTCATCCCTTGC	1	AAGGGATGAGATCTAAAGTGTTGA	1			AACCGAACTATAGTTTTCTATTTT	3	AATAGAAAACTATAGTTCGGTTCT	1
AAAATACAATTGCAATCCCTTAA	2	AAGGGATTGCAATTGTATTTTGG	1			AAACTCACAATCTCGGTCTATTAA	3	AATAGACCGAGATTGTGAGTTTGC	1
AACTAATAACACCCCCTTAG	1	AAGGGGGTGTTATTAGTTAA	1			AAAACTTCTGTTTGCGGCTATTTT	16	AATAGCCGCAAACAGAAGTTTTAT	4
AAACCCTTAACCCTAAACCCTTAA	1	AAGGGTTTAGGGTTAAGGGTTTAG	1			AACCCACGGTGCCACTCCTATTTC	1	AATAGGAGTGGCACCGTGGGTTGT	27
AAGATCTCTCCCAACGTACCTTGA	5	AAGGTACGTTGGGAGAGATCTTTT	2			AAAAGTGTCTATTCTCCCTATTTC	1	AATAGGGAGAATAGACACTTTTCT	1
AAACTTGGCATGTGATACCTTTT	5	AAGGTATCACATGCCAAGTTTGG	4			AACTCCCGCAAACGCACCTATTAC	2	AATAGGTGCGTTTGCGGGAGTTTT	1
AAATAACATAACTACATACCTTAT	1	AAGGTATGTAGTTATGTTATTTAT	1			AAAAGTAGTCACTTTACTATTCA	1	AATAGTAAAGTGACTACTTTTCA	1
AAAAGTCGTCTGCATGACCTTCA	1	AAGGTCATGCAGACGACTTTTGT	1			AAACTGGCAAGAGAGACTATTCT	2	AATAGTCTCTCTTGCCAGTTTCT	1
AACGTTAATGGACATGGACCTTAG	1	AAGGTCCATGTCCATTAACGTTCA	2			AACTAGATTTCGACAACTATTTA	2	AATAGTTGTCGAAATCTAGTTCA	1
AAAGCCAAGTCTTCGAAACCTTAT	1	AAGGTTTCGAAGACTTGGCTTTTG	155			AACCAAGAAATCCTACTATATTAT	2	AATATAGTAGGATTTCTTGGTTGT	1
AAATAGGTACTTGTTTTACTTTT	1	AAGTAAAACAAGTACCTATTTCT	1			AACACCCCCTGCAGATGATATTAT	2	AATATCATCTGCAGGGGGTGTTGT	2
AAGCACTCTGACTCACTTACTTAA	2	AAGTAAGTGAGTCAGAGTGCTTTA	1			AACACCACCACAGCGAGATATTAT	1	AATATCTCGCTGTGGTGGTGTTTC	3
AACGGGGATATCTTCGGTACTTAC	1	AAGTACCGAAGATATCCCCGTTTT	1			AAATCCAAGCAAACATATTCT	1	AATATGTTTGCTTGGATTTCA	2
AAATATGAAGATTCCAGTACTTAG	13	AAGTACTGGAATCTTCATATTTGT	8			AAAAGATCGTTATGGGAATATTGA	1	AATATTCCCATAACGATCTTTTAT	1
AAATTTTGACCTTTAAGTACTTTT	1	AAGTACTTAAAGGTCAAAATTTGG	3			AAGAGAAACCAGGGACAATATTTC	1	AATATTGTCCCTGGTTTCTCTTCA	1
AAAATGCCCGAAAAAGTACTTAA	2	AAGTACTTTTTCGGGCATTTTCG	46			AATAAGCACAAATCTCTTGATTTA	1	AATCAAGAGATTTGTGCTTATTTT	1
AAAAATGCCCGAAAAAGTACTTAA	1	AAGTACTTTTTCGGGCATTTTTGT	7			AATAGTTCAACTGTTTGTGATTCT	1	AATCACAAACAGTTGAACTATTCT	2
AACTCAAGCTTATCGTCTACTTTT	1	AAGTAGACGATAAGCTTGAGTTCC	1			AAACCCGGACATTTGTGTGATTGC	2	AATCACACAAATGTCCGGGTTTCA	1
AAGGCGCTACCTACTGCTACTTTC	2	AAGTAGCAGTAGGTAGCGCCTTGG	1			AACCGGCAATGTGGGGGTGATTGG	1	AATCACCCCCACATTGCCGGTTAT	1
AAGGCGCTACCTACTGCTACTTTT	1	AAGTAGCAGTAGGTAGCGCCTTGG	1			AAGAGCGTCTCTCCGGGTGATTGT	2	AATCACCCGGAGAGACGCTCTTAC	1
AAATTTGCCGCATCAGCTACTTTT	2	AAGTAGCTGATGCGGCAAATTTAA	1			AACCAAAACATCGTCCGTGATTAG	23	AATCACGGACGATGTTTTGGTTAA	11
AAGCGCCCTACTTTACCTACTTGA	1	AAGTAGGTAAAGTAGGGCGCTTAG	20			AATAAGGAATGCTTCTGATTCA	1	AATCAGAAGCATTCCTTATTTT	8
AAACAGTGAAAAGTGACTACTTTT	1	AAGTAGTCACTTTTCACTGTTTGA	3			AAAATAAGGAATGCTTCTGATTCA	9	AATCAGAAGCATTCCTTATTTTGT	17
AAACAGTGAAAAGTGACTACTTTG	1	AAGTAGTCACTTTTCACTGTTTGA	3			AAGTAAATTTTTTTGTCTGATTTT	45	AATCAGACAAAAAAATTTACTTTA	2
AACGAACAGAGGCGATACTTGA	3	AAGTATCGCCTCTGTTCGTTGT	1			AAAGGCAGGCGGTCTGATTAT	5	AATCAGACCGCCTGCCTTTCT	1
AAAAGCAGATCTCACATACTTTT	1	AAGTATGTGAGATCTGCTTTTTT	7			AACAATGTCCGTGCTGATTGT	1	AATCAGCACGGACATTGTTTA	3
AAAAAGCAGATCTCACATACTTTT	2	AAGTATGTGAGATCTGCTTTTTTG	1			AAATGGAGACGACCTGATTAT	3	AATCAGGTCGTCTCCATTTCT	1
AAACATCTGATCGTTTGACTTGA	150	AAGTCAAACGATCAGATGTTTAC	1			AAGAAATGGAGACGACCTGATTAT	169	AATCAGGTCGTCTCCATTTCTTAC	3
AAAGATCCGATCGTTTGACTTGA	4	AAGTCAAACGATCGGATCTTTAC	5			AAATGCAGACGACCTGATTAC	1	AATCAGGTCGTCTGCATTTCT	8
AAAAATCCGATCGTTTGACTTGA	1	AAGTCAAACGATCGGATTTTTAC	3			AAAGCCCGAAAAAACCTGATTGT	1	AATCAGGTTTTTTCGGGCTTTAC	2
AAATTTGATGCGGATTGACTTTA	1	AAGTCAATCCGCATCAAATTTAT	1			AAAGCCCGAAAAAAACCTGATTGT	1	AATCAGGTTTTTTTCGGGCTTTAC	1
AACAATTTTTTTTGGACTTTT	11	AAGTCCAAAAAAAATTGTTGC	3			AAACTAAACCGGACTGATTGG	3	AATCAGTCCGGTTTAGTTTAG	1
AACAAAATCATGCGGACTTAA	6	AAGTCCGCATGATTTTGTTAT	1			AAATTGTGTAGACTATGATTAA	1	AATCATAGTCTACACAATTTTT	1
AAACCATCTACTTTCAGGACTTTA	1	AAGTCCTGAAAGTAGATGGTTTCA	1			AAAAATTGTGTAGACTATGATTAA	6	AATCATAGTCTACACAATTTTTGT	1
AACATCTGATCGATAGACTTGA	7	AAGTCTATCGATCAGATGTTGA	1			AAAGTTAGTAACTCATATGATTGT	1	AATCATATGAGTTACTAACTTTGA	1
AACATCTGAACGATAGACTTGA	6	AAGTCTATCGTTCAGATGTTGA	1			AAGCCGGCGGAATACATGATTTC	1	AATCATGTATTCCGCCGGCTTTA	4
AAACCCTATGAACAAAAGACTTAA	2	AAGTCTTTTGTTCATAGGGTTTAG	1			AAGTAAGTGGCATTGAATGATTTA	74	AATCATTCAATGCCACTTACTTAT	1
AAACAACACAGAGAATTCACTTGC	9	AAGTGAATTCTCTGTGTTGTTTTT	5			AAGTAAGTGTCAAAGAATGATTTA	1	AATCATTCTTTGACACTTACTTAT	2
AAGATGTGTCTATGTGTCACTTCG	1	AAGTGACACATAGACACATCTTAG	4			AACAGTGGATTAGTGTTGGATTTC	35	AATCCAACACTAATCCACTGTTAT	1
AAATGTAGAAAGTTTCTCACTTGA	1	AAGTGAGAAACTTTCTACATTTTC	1			AAAATATTACAAAGTGGATTTT	2	AATCCACTTTGTAATATTTTAA	1
AAACAGAGACGATTCTCACTTCT	1	AAGTGAGAATCGTCTCTGTTTTC	1			AAGCGTTTCTCGTTTCTGGATTGA	1	AATCCAGAAACGAGAAACGCTTGA	1
AAAACAAACAAGACAATCACTTAA	2	AAGTGATTGTCTTGTTTGTTTTAT	15			AAGCTACCGTGCGCTGGATTAT	2	AATCCAGCGCACGGTAGCTTCG	2
AACTGAAAAGATATGTGCACTTTG	2	AAGTGCACATATCTTTTCAGTTAA	1			AAATCTGCGTGATATATGGATTGG	7	AATCCATATATCACGCAGATTTCT	2
AAATTCAAATTCCGTCGCACTTGT	1	AAGTGCGACGGAATTTGAATTTGT	5			AAACTGAGAAGTCGCATGGATTAC	107	AATCCATGCGACTTCTCAGTTTAA	1
AAAGAAGTCAGTTGCAGCACTTAG	1	AAGTGCTGCAACTGACTTCTTTAT	1			AAAAATTCTGGCTTATGGGATTGG	1	AATCCCATAAGCCAGAATTTTTAA	1
AAGATATTTACGGATTCCACTTTT	1	AAGTGGAATCCGTAAATATCTTAA	7			AAGATGACAGCGACGGGATTGA	29	AATCCCGTCGCTGTCATCTTCT	1
AAGCTGCACAGATTTCCCACTTTG	1	AAGTGGGAAATCTGTGCAGCTTAA	17			AAACTACATGTACTTTCGGATTTA	2	AATCCGAAAGTACATGTAGTTTTA	2
AAGCCTCCACTTTCTTACACTTTC	1	AAGTGTAAGAAAGTGGAGGCTTGG	1			AAAGTAGACTGAATCGCGGATTGA	3	AATCCGCGATTCAGTCTACTTTAT	1
AACGAACGAGATACTTACACTTAC	3	AAGTGTAAGTATCTCGTTCGTTTT	2			AAGGATCAAAATCGTTAGGATTGG	4	AATCCTAACGATTTTGATCCTTCT	1
AACTGTTTGATTCGTACACTTAG	1	AAGTGTACGAATCAAACAGTTAA	1			AAAGTTGCTAATTCATAGGATTGT	1	AATCCTATGAATTAGCAACTTTGA	1
AAAAATACACAGCGTACACTTTA	7	AAGTGTACGCTGTGTATTTTTTA	2			AATAAGTTCTAATTGCAGGATTTA	1	AATCCTGCAATTAGAACTTATTTA	1
AAAAAATACACAGCGTACACTTTA	14	AAGTGTACGCTGTGTATTTTTTAT	2			AATAAGTTCCAACTGCAGGATTTA	1	AATCCTGCAGTTGGAACTTATTTA	1
AACAAGCCGCCGACTAACACTTCC	1	AAGTGTTAGTCGGCGGCTTGTTGG	1			AATAAGTCCCAACTACAGGATTTA	1	AATCCTGTAGTTGGGACTTATTTA	1
AAAAAACTCTCTCAAAACACTTAA	1	AAGTGTTTTGAGAGAGTTTTTTAG	2			AATACACAAGTTAATTTCGATTGC	1	AATCGAAATTAACTTGTGTATTTT	1
AAGGACAGATTGGAGTTAACTTTT	14	AAGTTAACTCCAATCTGTCCTTGA	21			AATATCTGACGGCAATTCGATTTC	1	AATCGAATTGCCGTCAGATATTGG	1
AAAAATATGACGGAGTTAACTTTT	1	AAGTTAACTCCGTCATATTTTTGT	1			AAACCAGTCCAGACCTGCGATTTC	1	AATCGCAGGTCTGGACTGGTTTGG	1
AACCAGAACTGCTCTATAACTTTC	18	AAGTTATAGAGCAGTTCTGGTTAT	18			AAACTTTATATGATCCGATTGA	1	AATCGGATCATATAAAGTTTAG	5
AACTTTATGACTCTATAACTTCT	5	AAGTTATAGAGTCATAAAGTTTT	8			AATCAACTCGCCGGTACCGATTAC	18	AATCGGTACCGGCGAGTTGATTGG	35
AAACTTTATGACTCTATAACTTCT	3	AAGTTATAGAGTCATAAAGTTTTA	6			AAAGTTACTAACTCATACGATTAT	1	AATCGTATGAGTTAGTAACTTTGA	4
AACTATGACGGAATGATAACTTAG	8	AAGTTATCATTCCGTCATAGTTGC	2			AAGTACGATTAGGGTTTAGATTTT	1	AATCTAAACCCTAATCGTACTTTC	1
AAAACGGAGAGAAGATAACTTAA	25	AAGTTATCTTCTCTCCGTTTTAC	1			AAGTACGATTAGGGTTTAGATTTA	1	AATCTAAACCCTAATCGTACTTTC	1
AACTTTATGACTCCATAACTTTT	1	AAGTTATGGAGTCATAAAGTTTT	3			AATCCCATATATCACGTAGATTTC	1	AATCTACGTGATATATGGGATTGA	1
AAACTTTATGACTCCATAACTTTT	11	AAGTTATGGAGTCATAAAGTTTTA	1			AAAGACTATGGTTGTAGAGATTTT	1	AATCTCTACAACCATAGTCTTTAC	1
AAGATATAAGGCCTTTGAACTTAA	1	AAGTTCAAAGGCCTTATATCTTCC	9			AAATCTAAATCGTTGAGAGATTAT	12	AATCTCTCAACGATTTAGATTTTC	1
AAAGACGAAATCAAATGAACTTAA	1	AAGTTCATTTGATTTCGTCTTTCT	1			AAGCATCCGAGCTTGAGAGATTAC	3	AATCTCTCAAGCTCGGATGCTTTA	1
AAGAAGCAGGACAATGGAACTTTT	1	AAGTTCCATTGTCCTGCTTCTTTC	1			AATAGGTCTAGGCATTCAGATTTT	8	AATCTGAATGCCTAGACCTATTGG	2
AACACCGGCGCCAATACAACTTAG	2	AAGTTGTATTGGCGCCGGTGTTGT	1			AACAAAACTTCATGGTCAGATTCT	3	AATCTGACCATGAAGTTTTGTTAT	3
AACGGCCCAGTCAACGAAACTTAC	2	AAGTTTCGTTGACTGGGCCGTTTA	8			AATCCCATATATCACGCAGATTTC	22	AATCTGCGTGATATATGGGATTGG	1
AACAGTATCGGCATGCAAACTTTT	39	AAGTTTGCATGCCGATACTGTTAG	1			AATAAGTCCAACTCTAAGATTTA	1	AATCTTAGAGTTGGACTTATTTA	1
AACAAATCCAAGGACAAACTTAT	1	AAGTTTGTCCTTGGATTTGTTGT	4			AAAAGTGGGATTAAATAAGATTTT	6	AATCTTATTTAATCCCACTTTTGT	1
AAAGTTACAGAGAGTTTTATTTC	1	AATAAAACTCTCTGTAACTTTGA	1			AAGATGTACGATGATGAAGATTGA	19	AATCTTCATCATCGTACATCTTCT	1
AAGAAATTTAACAGAGTTTATTCA	1	AATAAACTCTGTTAAATTTCTTAA	1			AACTGTATGAACAACAAAGATTGA	194	AATCTTTGTTGTTCATACAGTTAT	1
AAAGCCAGGATGCAAGTTTATTGA	7	AATAAACTTGCATCCTGGCTTTAT	3			AAAGTTGAGGGTTTTTTTCATTAA	2	AATGAAAAAAACCCTCAACTTTGG	1
AAACTTGCATCCTGGCTTTATTCA	3	AATAAAGCCAGGATGCAAGTTTAT	9			AAGCATCCAACACGATTTCATTAT	1	AATGAAATCGTGTTGGATGCTTTG	1
AAACAGGTGTTGTGTATTTATTGG	3	AATAAATACACAACACCTGTTTAC	2			AATCCTGCTATCAAAGTTCATTTT	1	AATGAACTTTGATAGCAGGATTTG	3
AAGCATGCAAGGATTTGTTATTGG	1	AATAACAAATCCTTGCATGCTTGA	1			AAATCTTGACAGCTTATTCATTAT	1	AATGAATAAGCTGTCAAGATTTCA	7
AAAGAGCCCGGTATTGTTATTTA	1	AATAACAATACCGGGCTCTTTCG	1			AAGGAATGCTTCTGATTCATTGT	3	AATGAATCAGAAGCATTCCTTAT	1
AAGAGATTTAGGGGGTGTTATTGG	2	AATAACACCCCCTAAATCTCTTTC	1			AACATCACCGTAGAAATTCATTAA	3	AATGAATTTCTACGGTGATGTTCT	4
AAAAGCTGCAGTAACTGTTATTAT	1	AATAACAGTTACTGCAGCTTTTTC	1			AAGGATGTCAAATTTGGTCATTCA	3	AATGACCAAATTTGACATCCTTAT	1
AACAGAACAACTGATCGTTATTCC	21	AATAACGATCAGTTGTTCTGTTGA	5			AAGCAGTGTAGCGGTCATTTA	4	AATGACCGCTACACTGCTTAT	62
AACAGAACAACTGATCGTTATTTC	5	AATAACGATCAGTTGTTCTGTTGA	5			AACAGAGGGTATTTTAGTCATTTA	3	AATGACTAAAATACCCTCTGTTAA	5
AACAGAGGGCATTTTAGTTATTTA	8	AATAACTAAAATGCCCTCTGTTAA	2			AATATGGCAAGCTCTAGTCATTAT	2	AATGACTAGAGCTTGCCATATTGT	2
AACTCTTGATTTGTTAGTTATTGC	1	AATAACTAACAAATCAAGAGTTTA	1			AACATGCCGTTATCAGTCATTAA	1	AATGACTGATAACGGCATGTTTA	6
AAGTAGCTGACTCTCCTTATTAG	1	AATAAGGAGAGTCAGCTACTTGG	1			AAAACCCTAGATCTAAGTCATTAT	1	AATGACTTAGATCTAGGGTTTTTT	3
AAATCTTAGAGTTGGACTTATTTA	2	AATAAGTCCAACTCTAAGATTTAT	1			AAACTGCGAATGGCTCATTAA	27	AATGAGCCATTCGCAGTTTCA	1
AACAGCTATCACCTATATTATTAC	10	AATAATATAGGTGATAGCTGTTAG	2			AAAATGTTACTTAGGCCTCATTAA	2	AATGAGGCCTAAGTAACATTTTCA	4
AAATGCAGGCGGCCTGATTATTGA	2	AATAATCAGGCCGCCTGCATTTCT	2			AACCACAGCTTGACACCTCATTAA	4	AATGAGGTGTCAAGCTGTGGTTAA	5
AAATGGAGACGACCTGATTATTCT	7	AATAATCAGGTCGTCTCCATTTCT	2			AAGTTCCCCTATGATACTCATTTT	1	AATGAGTATCATAGGGGAACTTTT	2
AAGGCACTTTAGATAAATTATTTT	1	AATAATTTATCTAAAGTGCCTTCT	1			AAACGGAGGGAGTATATCATTTA	9	AATGATATACTCCCTCCGTTTCA	1
AAGGCCGGCCCAATAAATTATTGG	1	AATAATTTATTGGGCCGGCCTTGC	1			AATCTGCCTGTGGAATATCATTTT	1	AATGATATTCCACAGGCAGATTCT	1
AAGTGGCATGTCTTGTTGTATTTC	7	AATACAACAAGACATGCCACTTAT	1			AACACTTCACCGGATCATTCA	13	AATGATCCGGTGAAGTGTTCG	23
AAGGTTGAGAATATATTGTATTGT	2	AATACAATATATTCTCAACCTTAA	1			AAGAAGTAGCGGTGTAATCATTAT	1	AATGATTACACCGCTACTTCTTAA	3
AAATAGATAGTTAAATTGTATTAC	2	AATACAATTTAACTATCTATTTCA	3			AAGAAGCTGAAGCAAAATCATTAT	6	AATGATTTTGCTTCAGCTTCTTCG	2
AAGATAGTGAGAATAGTGTATTGT	3	AATACACTATTCTCACTATCTTAA	1			AAGTAATCAGGTCGTCTGCATTTC	58	AATGCAGACGACCTGATTACTTGT	10
AAAGCCTAAAGATCAATGTATTGT	3	AATACATTGATCTTTAGGCTTTAA	7			AAGTACTTTTTCGGGCATTTT	38	AATGCCCGAAAAAGTACTTAA	1
AACTGCGTGGTAACTGGTATTCA	2	AATACCAGTTACCACGCAGTTGC	1			AAAGTCAATTCAATGCAGCATTAT	1	AATGCTGCATTGAATTGACTTTGT	1
AAATACGCGACGGGGTATTGT	12	AATACCCCGTCGCGTATTTAA	4			AAGTAAAGACTTCTCAAGCATTAA	1	AATGCTTGAGAAGTCTTTACTTTA	1
AACTTGAGAGTTCAGACGTATTAG	11	AATACGTCTGAACTCTCAAGTTTT	1			AAGTGACAATGAGGGGTCCATTTT	1	AATGGACCCCTCATTGTCACTTGT	4
AAAGAAAAAGAATGCACGTATTTA	1	AATACGTGCATTCTTTTTCTTTCT	1			AATAATCAGGTCGTCTCCATTTC	1	AATGGAGACGACCTGATTATTCT	7
AACGTCATATTAATTTAGTATTTA	1	AATACTAAATTAATATGACGTTGT	3			AATGACATATATAACCTCCATTCA	1	AATGGAGGTTATATATGTCATTTT	1
AAAAAGGAACAGATTGAGTATTAC	2	AATACTCAATCTGTTCCTTTTTGT	1			AATCGAAAATCAGCATCCATTCA	1	AATGGATGCTGATTTTCGATTCA	20
AAAACATAGCATCAGAGTATTGG	1	AATACTCTGATGCTATGTTTTGT	3			AATCGAAAATCAGCATCCATTCA	1	AATGGATGCTGATTTTCGATTTA	2
AAACTTATGGAACTTCAGTATTAA	3	AATACTGAAGTTCCATAAGTTTAT	1			AATAAGCCAGTGCCAGCCATTGT	1	AATGGCTGGCACTGGCTTATTAA	1
AAAACCGCACTGCAACAGTATTGT	1	AATACTGTTGCAGTGCGGTTTTGT	21			AACAACGCTCCTAACAGCCATTAC	1	AATGGCTGTTAGGAGCGTTGTTAA	4
AAAACCGCACCGCAACAGTATTAA	1	AATACTGTTGCGGTGCGGTTTTGG	11			AACCTTGTCAAGAAAACCCATTGG	2	AATGGGTTTTCTTGACAAGGTTTT	1
AAGAGAGAAACCTAAAAGTATTAA	1	AATACTTTTAGGTTTCTCTCTTTA	2			AAAAAAACCGCAGCGTACCATTTG	1	AATGGTACGCTGCGGTTTTTTTCT	2
AAGCGAGAAATGAAAAAGTATTTT	1	AATACTTTTTCATTTCTCGCTTTC	1			AACTAAGCGTTGACTACCATTTA	16	AATGGTAGTCAACGCTTAGTTCA	1
AAACTACGATTTCTCTATTAT	1	AATAGAGAAATCGTAGTTTTA	2			AACTAAACGTTGACTACCATTTA	7	AATGGTAGTCAACGTTTAGTTCA	1
AAAGCCTTATGCCACCTCTATTGC	1	AATAGAGGTGGCATAAGGCTTTAT	2			AACACTCCCCTTGATGACCATTAT	1	AATGGTCATCAAGGGGAGTGTTAT	3
AAACCCACATAACACTCTATTTA	1	AATAGAGTGTTATGTGGGTTTTA	1			AACACTCCCCCTGATGACCATTAT	13	AATGGTCATCAGGGGGAGTGTTAT	5
AACGATTGGCTAGATATCTATTTT	1	AATAGATATCTAGCCAATCGTTTA	1			AACGGACCATCTGCAGACCATTTT	4	AATGGTCTGCAGATGGTCCGTTGC	8
AAGTTAGATTGTAACCGCTATTGA	4	AATAGCGGTTACAATCTAACTTGT	1			AAACCTTTCCGCATGCACCATTAT	1	AATGGTGCATGCGGAAAGGTTTAA	4
AACCCACGGTGCCACTCCTATTTC	2	AATAGGAGTGGCACCGTGGGTTGT	14			AATCCCCAAAATTAACCATTGA	10	AATGGTTAATTTTGGGGATTTT	5
AAAGTGTCTATTCTCCCTATTTC	1	AATAGGGAGAATAGACACTTTTC	3			AAAATCCCCAAAATTAACCATTGA	2	AATGGTTAATTTTGGGGATTTTGT	20
AAAAGTGTCTATTCTCCCTATTTC	1	AATAGGGAGAATAGACACTTTTCT	2			AATAGAACACTTTAAAACCATTAG	4	AATGGTTTTAAAGTGTTCTATTGT	1
AAACAGTGAAAAGTGACTATTTT	2	AATAGTCACTTTTCACTGTTTGA	1			AACTGGGCCGAGTATTTACATTTT	2	AATGTAAATACTCGGCCCAGTTGT	1
AAGCCAGCTGTTCTCCACTATTCT	1	AATAGTGGAGAACAGCTGGCTTCT	4			AAGGTTTCATGCGGCTTACATTTT	3	AATGTAAGCCGCATGAAACCTTAA	2
AACTAGATTTCGGCAACTATTTA	41	AATAGTTGCCGAAATCTAGTTTA	1			AAGAGATCGATTGTAGTACATTAG	1	AATGTACTACAATCGATCTCTTAT	2
AACTAGATTTCGGCAACTATTTT	1	AATAGTTGCCGAAATCTAGTTTA	1			AAACGCCAATCCAAAGTACATTAT	1	AATGTACTTTGGATTGGCGTTTAT	13
AAATAGGTAAAACGGATATATTGT	2	AATATATCCGTTTTACCTATTTCA	2			AAAGGTTTAGAGCATCTACATTGC	1	AATGTAGATGCTCTAAACCTTTCA	3
AAGAACTACGACTAAATATATTCT	1	AATATATTTAGTCGTAGTTCTTGT	2			AACATAGAAGACTCACTACATTTG	3	AATGTAGTGAGTCTTCTATGTTTT	1
AACACCCCCTGCAGATGATATTAT	9	AATATCATCTGCAGGGGGTGTTGT	2			AAGTGATGATTTAAATGACATTTT	1	AATGTCATTTAAATCATCACTTTA	1
AAGCGGTAGATTAATGATATTAT	2	AATATCATTAATCTACCGCTTCA	1			AAAAATTATATGTTCGGACATTGT	15	AATGTCCGAACATATAATTTTTGC	1
AAGCGGTAGATTAATGATATTTT	1	AATATCATTAATCTACCGCTTCA	1			AAAAATTATATGTTCGGACATTAT	3	AATGTCCGAACATATAATTTTTGC	1
AACAAGATAAAAAGAGGATATTAT	22	AATATCCTCTTTTTATCTTGTTAT	1			AAGACAATCAGCACGGACATTGT	31	AATGTCCGTGCTGATTGTCTTGG	2
AAAATCCGATCTAAAAGATATTGT	2	AATATCTTTTAGATCGGATTTTTA	17			AAGACAATCAGCACGGACATTGT	31	AATGTCCGTGCTGATTGTCTTGC	2
AATAGGTCAAGAAGCTCATATTTT	5	AATATGAGCTTCTTGACCTATTGC	1			AAACGAACAACACAGCGACATTTA	2	AATGTCGCTGTGTTGTTCGTTTGA	1
AACCTTGCTCTGATACCATATTAG	2	AATATGGTATCAGAGCAAGGTTGG	8			AAAGAGTTGCATCTACCACATTCA	8	AATGTGGTAGATGCAACTCTTTTT	511
AACAGATAGATATTTGAATATTCA	13	AATATTCAAATATCTATCTGTTAC	1			AAAGTCATTCAGATGGAACATTCA	1	AATGTTCCATCTGAATGACTTTAT	2
AAGCAAAATATACCGAATATTCA	1	AATATTCGGTATATTTTGCTTCA	2			AACGATCAGAGGAAGCAACATTGG	1	AATGTTGCTTCCTCTGATCGTTAG	1
AAGCAAAATATACCGAATATTCA	1	AATATTCGGTATATTTTGCTTCT	1			AAACAGCCTAAGCCCAACATTTC	1	AATGTTGGGCTTAGGCTGTTTCC	1
AAGTACGAAGATTAAGAATATTTA	2	AATATTCTTAATCTTCGTACTTTT	2			AACGGATTTTAAAAGGTTAATTAA	5	AATTAACCTTTTAAAATCCGTTGT	1
AACGTAATTCGACAGCAATATTAA	1	AATATTGCTGTCGAATTACGTTAT	1			AAACAAACAGATCCATTAATTTC	1	AATTAATGGATCTGTTTGTTTAA	3
AAGTCCTTTTTCTTTTTTGATTCA	1	AATCAAAAAAGAAAAAGGACTTAA	9			AAACCGTTCAATAAAATTAATTAT	1	AATTAATTTTATTGAACGGTTTGG	1
AAGGTATTGAACTGACTTGATTTT	1	AATCAAGTCAGTTCAATACCTTAT	2			AATGACGTGGCGGCTTGTAATTAG	82	AATTACAAGCCGCCACGTCATTAG	1
AAGGTATTGAACTGACTTGATTCT	1	AATCAAGTCAGTTCAATACCTTAT	2			AATGACGTGGCGACTTGTAATTAG	30	AATTACAAGTCGCCACGTCATTAG	3
AACTTTAGTGTATGATTGATTGG	2	AATCAATCATACACTAAAGTTAC	1			AAGAGTTCTAGACGCGGTAATTGC	2	AATTACCGCGTCTAGAACTCTTTA	1
AACATCTCCATTACATTGATTAA	1	AATCAATGTAATGGAGATGTTGA	1			AATCTCAGTCTAATTCGTAATTCC	1	AATTACGAATTAGACTGAGATTGT	3
AACCCTACTCTATAATTGATTCA	1	AATCAATTATAGAGTAGGGTTGG	1			AACTCCTTCTAACAGCGTAATTGA	1	AATTACGCTGTTAGAAGGAGTTTT	1
AAATGTATTGTTCTTTGTGATTTA	1	AATCACAAAGAACAATACATTTAA	1			AAACAACCATTATACAGTAATTTT	2	AATTACTGTATAATGGTTGTTTGG	3
AAACCCGGACATTTGTGTGATTGC	3	AATCACACAAATGTCCGGGTTTCA	1			AATGATTGTGAAGTGTCTAATTAC	4	AATTAGACACTTCACAATCATTAG	1
AAATTTGATTGATAATGTGATTGA	2	AATCACATTATCAATCAAATTTAA	1			AAAATGATTGTCAGATCTAATTCA	26	AATTAGATCTGACAATCATTTTGA	16
AACCGGCAATGTGGGGGTGATTGG	1	AATCACCCCCACATTGCCGGTTAT	2			AATGATTGTGAAGTGCCTAATTAC	15	AATTAGGCACTTCACAATCATTAG	5
AAGAGCGTCTCTCCGGGTGATTGT	2	AATCACCCGGAGAGACGCTCTTAC	2			AACATCCATTCAAAACCTAATTGC	1	AATTAGGTTTTGAATGGATGTTGT	6
AAATAAGATTTTTCGTGATTTC	3	AATCACGAAAAATCTTATTTAA	1			AATCCAATGCATTTGACTAATTAT	1	AATTAGTCAAATGCATTGGATTGT	2
AAAACATCGTCCGTGATTAG	1	AATCACGGACGATGTTTTGG	1			AAGAGTTGTAGCAGATATAATTTA	17	AATTATATCTGCTACAACTCTTAA	4
AACCAAAACATCGTCCGTGATTAG	41	AATCACGGACGATGTTTTGGTTAA	6			AACAGATTATACATGATAATTTA	1	AATTATCATGTATAATCTGTTGT	1
AAAATAAGGAATGCTTCTGATTCA	3	AATCAGAAGCATTCCTTATTTTGT	12			AAGGCACTTTAAATGGATAATTTG	1	AATTATCCATTTAAAGTGCCTTCT	1
AAAAGCTCGTTTGATTCTGATTTT	1	AATCAGAATCAAACGAGCTTTTAC	1			AAGCCGGAAGAAACAGTGAATTCT	20	AATTCACTGTTTCTTCCGGCTTAT	4
AAGTTTTTATGTCGGTCTGATTGG	2	AATCAGACCGACATAAAAACTTTG	1			AAGCCGGAAGAAACAGTGAATTCT	20	AATTCACTGTTTCTTCCGGCTTAA	2
AAATGCAGGCGGTCTGATTAT	1	AATCAGACCGCCTGCATTTCT	1			AAATTATTCTACTATATGAATTAA	1	AATTCATATAGTAGAATAATTTAA	8
AAATGCCACAACACTGCTGATTGC	1	AATCAGCAGTGTTGTGGCATTTTC	3			AAAATGAACAAGCGGATGAATTTT	1420	AATTCATCCGCTTGTTCATTTTAT	1
AAGAAATGGAGACGACCTGATTAT	198	AATCAGGTCGTCTCCATTTCTTAC	4			AATCGCCTATCTCGTCGGAATTAA	1	AATTCCGACGAGATAGGCGATTTC	2
AAATGCAGACGACCTGATTAC	1	AATCAGGTCGTCTGCATTTCT	7			AAACAATCAAGAGAGTCGAATTTT	1	AATTCGACTCTCTTGATTGTTTTC	1
AACGAACAGAATAGCTATGATTTG	6	AATCATAGCTATTCTGTTCGTTGA	1			AACGTATTTTCCGTGCCGAATTAT	1	AATTCGGCACGGAAAATACGTTCC	1
AAAAATTGTGTAGACTATGATTAA	2	AATCATAGTCTACACAATTTTTGT	5			AACGACAATGATGGAGAATTCA	1	AATTCTCCATCATTGTCGTTGT	1
AAGTACTTGCTAAAATATGATTGC	1	AATCATATTTTAGCAAGTACTTGT	1			AAAACCGTAAAATCAGAGAATTGC	1	AATTCTCTGATTTTACGGTTTTGG	1
AAACCTAAGAATTTGATGATTTA	1	AATCATCAAATTCTTAGGTTTCT	1			AATAAATCCCAACTCCAGAATTTA	2	AATTCTGGAGTTGGGATTTATTTA	2
AATAAGTCTCAACTTCATGATTTA	1	AATCATGAAGTTGAGACTTATTTA	1			AACAAAAGCCTGATCCAGAATTCT	1	AATTCTGGATCAGGCTTTTGTTGC	1
AAAGGAGAGAAATGTCATGATTGC	22	AATCATGACATTTCTCTCCTTTCA	1			AATAAGTCTCAACTACAGAATTTA	1	AATTCTGTAGTTGAGACTTATTTA	1
AAGTAAGTGGCATTGAATGATTTA	77	AATCATTCAATGCCACTTACTTAT	4			AATGGACGATGCCTTAAGAATTTA	1	AATTCTTAAGGCATCGTCCATTAT	1
AAGTAAGTGACATTGAATGATTTA	2	AATCATTCAATGTCACTTACTTAT	1			AACGGCTAATAACAATTCAATTTA	57	AATTGAATTGTTATTAGCCGTTAG	1
AAGTAAGTGTCAAAGAATGATTTA	1	AATCATTCTTTGACACTTACTTAT	1			AAGAACAACAGAATTCTCAATTAC	1	AATTGAGAATTCTGTTGTTCTTTG	1
AAGCCTCCTTGACCCAATGATTGA	1	AATCATTGGGTCAAGGAGGCTTCC	1			AAACTGTTCTCATAGCTCAATTCT	1	AATTGAGCTATGAGAACAGTTTTT	1
AACGACGGTTTACAAAATGATTCA	6	AATCATTTTGTAAACCGTCGTTAA	1			AACAGTTGATGATACAATTAT	10	AATTGTATCATCAACTGTTCA	10
AACCTCTTCTTGTCTTTGGATTTC	2	AATCCAAAGACAAGAAGAGGTTTG	1			AAACCGGATTTAACATACAATTAG	6	AATTGTATGTTAAATCCGGTTTGA	1
AAGCATGACTCTTTGGATTAT	1	AATCCAAAGAGTCATGCTTAA	1			AATAGTACTAAGTAACACAATTTG	5	AATTGTGTTACTTAGTACTATTAA	3
AAGTGACTACATTTGGATTGA	13	AATCCAAATGTAGTCACTTTC	1			AATCTAACGGCTAATAACAATTCA	2	AATTGTTATTAGCCGTTAGATTTT	1
AACTCATTAGGGTTCATGGATTGA	1	AATCCATGAACCCTAATGAGTTGA	1			AACGACATGCAAACGAACAATTTA	2	AATTGTTCGTTTGCATGTCGTTGG	1
AAAAATTCTGGCTTATGGGATTGG	3	AATCCCATAAGCCAGAATTTTTAA	2			AAAAAGTAACCGTCAACAATTTA	1	AATTGTTGACGGTTACTTTTTTA	9
AAAGAATGATTTACAAGGGATTTT	2	AATCCCTTGTAAATCATTCTTTGA	1			AAAAAAGTAACCGTCAACAATTTA	2	AATTGTTGACGGTTACTTTTTTAC	6
AAACTACATGTACTTTCGGATTTG	4	AATCCGAAAGTACATGTAGTTTTA	1			AATAGTATCGTCAAACAATTGA	1	AATTGTTTGACGATACTATTCA	1
AAACTTTTATGTACCGCGGATTAA	15	AATCCGCGGTACATAAAAGTTTGT	1			AAAGACTGTATCCTAAATTTC	7	AATTTAGGATACAGTCTTTAT	7
AAATATAGTATGTTCGAGGATTTT	4	AATCCTCGAACATACTATATTTAC	1			AAATGACGCTTGAAAGGAAATTAA	3	AATTTCCTTTCAAGCGTCATTTAA	1
AAATATAGTATGTTCGAGGATTGT	1	AATCCTCGAACATACTATATTTAC	1			AACCATGCTCAGACACGAAATTAC	1	AATTTCGTGTCTGAGCATGGTTTA	2
AAGTTTACCGGGTCCGAGGATTTG	1	AATCCTCGGACCCGGTAAACTTTT	1			AATCAACACCGTCTGTCAAATTAA	3	AATTTGACAGACGGTGTTGATTAT	6
AACGGCACTGTGGTTCAGGATTCA	1	AATCCTGAACCACAGTGCCGTTGC	2			AAAACTGTCTACTTCTCAAATTAT	1	AATTTGAGAAGTAGACAGTTTTTT	1
AATAAGTTTCAAGTCCAGGATTTA	1	AATCCTGGACTTGAAACTTATTTA	1			AAAACTACCTACTTTGCAAATTAT	2	AATTTGCAAAGTAGGTAGTTTTTT	3
AATAAATCTCAACTCCAGGATTTA	1	AATCCTGGAGTTGAGATTTATTTA	1			AAAACTACCTACTTTGCAAATTAT	2	AATTTGCAAAGTAGGTAGTTTTTA	2
AATAAGTCTCAACTACAGGATTTA	1	AATCCTGTAGTTGAGACTTATTTA	1			AAAAATGACTACTTTGCAAATTAT	1	AATTTGCAAAGTAGTCATTTTTAA	1
AATAAGTCCCAACTACAGGATTTA	1	AATCCTGTAGTTGGGACTTATTTA	1			AATCCCATATATCACGCAAATTTC	3	AATTTGCGTGATATATGGGATTAG	6
AATCAACTCGCCGGTACCGATTAC	27	AATCGGTACCGGCGAGTTGATTGG	17			AATCCCATATATCACGCAAATTTC	3	AATTTGCGTGATATATGGGATTAT	3
AATCCCATATATCACGTAGATTTC	4	AATCTACGTGATATATGGGATTGA	1			AATCCCATATATCACGCAAATTTC	3	AATTTGCGTGATATATGGGATTGA	2
AACGAAACAAGTAAAATAGATTGA	1	AATCTATTTTACTTGTTTCGTTTT	1			AACCAAATAAAACATACAAATTAA	1	AATTTGTATGTTTTATTTGGTTAT	2
AAGTGATGTAAAGCGGGAGATTAA	6	AATCTCCCGCTTTACATCACTTAT	2			AATTATCGACGCTAAAATTAG	1	AATTTTAGCGTCGATAATTAA	1
AAGCATCCGAGCTTGAGAGATTAC	5	AATCTCTCAAGCTCGGATGCTTTA	3			AAGGTGTCCACGGTGAAAATTTC	1	AATTTTCACCGTGGACACCTTTC	3
AAATCATAAACAATCAGAGATTTT	1	AATCTCTGATTGTTTATGATTTAA	2			AACTGAACCAACACGAAAATTCC	4	AATTTTCGTGTTGGTTCAGTTGG	1
AATAGGTCTAGGCATTCAGATTTT	7	AATCTGAATGCCTAGACCTATTGG	4			AACGCCCGTGAACCAGAAAATTGG	1	AATTTTCTGGTTCACGGGCGTTAC	3
AACAAAACTTCATGGTCAGATTCT	1	AATCTGACCATGAAGTTTTGTTAT	1			AAAGTACTTAAAGGTCAAAATTTG	1	AATTTTGACCTTTAAGTACTTTTT	1
AACAATATTAACGATGCAGATTTT	1	AATCTGCATCGTTAATATTGTTTT	1			AAAAATGAATCCGGCCAAAATTGA	2	AATTTTGGCCGGATTCATTTTTAA	2
AATCCCATATATCACGCAGATTTC	40	AATCTGCGTGATATATGGGATTGG	5			AACCCAATACCAAACCAAAATTAA	1	AATTTTGGTTTGGTATTGGGTTTG	1
AATCCCATATATCACGCAGATTTC	40	AATCTGCGTGATATATGGGATTGT	1			AAAAAGTCCAAAAAAAATTGT	1	AATTTTTTTTGGACTTTTTGG	1
AATCCCATATATCACGCAGATTTT	1	AATCTGCGTGATATATGGGATTGG	5			AAATACATATCTTTTTTTTTGTCT	8	ACAAAAAAAAAGATATGTATTTAT	6
AATCCCATATATCACGCAGATTTT	1	AATCTGCGTGATATATGGGATTGT	1			AAATAGAGCCTAAATTTTTTGTTT	1	ACAAAAAATTTAGGCTCTATTTGT	1
AATCCGAATATCCGTAAGATTTA	1	AATCTTACGGATATTCGGATTTT	3			AACTGAGAGTAAAACTTTTTGTAA	1	ACAAAAAGTTTTACTCTCAGTTTT	1
AAAGTTGCTAATTCATAAGATTGT	1	AATCTTATGAATTAGCAACTTTGA	1			AATGTAGCTGCGGTTTTGTGT	3	ACAAAACCGCAGCTACATTAG	1
AAAGTTGCTAACTCATAAGATTGT	18	AATCTTATGAGTTAGCAACTTTAA	1			AATGACTTATATAACCTTTTGTTA	1	ACAAAAGGTTATATAAGTCATTTC	1
AATCGACGGTTTTAATAAGATTGA	1	AATCTTATTAAAACCGTCGATTAC	2			AATAAGTCAGTCGCTATTTTGTTA	1	ACAAAATAGCGACTGACTTATTAA	1
AAAAGTGGGATTAAATAAGATTTT	3	AATCTTATTTAATCCCACTTTTGT	1			AACAATCGCCATTTTTGTTTGTTT	1	ACAAACAAAAATGGCGATTGTTAA	1
AATAAGTCTCAACTACAAGATTTA	1	AATCTTGTAGTTGAGACTTATTTA	1			AAAGCAGTATCTAATGGTTTGTAA	1	ACAAACCATTAGATACTGCTTTAG	1
AAAGCCCGTATCCCACAAGATTCA	1	AATCTTGTGGGATACGGGCTTTGC	6			AATATTCTCCTATGTCGTTTGTGA	1	ACAAACGACATAGGAGAATATTCT	1
AAATGATTAAGGAATAAAGATTGG	6	AATCTTTATTCCTTAATCATTTTT	1			AAGTAGATTCTGTACCGTTTGTAA	2	ACAAACGGTACAGAATCTACTTAT	15
AAATGATTCAGAAATAAAGATTGG	6	AATCTTTATTTCTGAATCATTTAT	2			AAGTTTGTGGGAAAAGTTTGTAG	1	ACAAACTTTTCCCACAAACTTGA	1
AAAGACGGATCATCAAAGATTTC	1	AATCTTTGATGATCCGTCTTTAG	1			AATAAATAGGTAGAAACTTTGTAG	1	ACAAAGTTTCTACCTATTTATTCT	4
AACTGTATGAACAACAAAGATTGA	156	AATCTTTGTTGTTCATACAGTTAT	2			AAAAGGATAAGTAAGTATTTGTAT	1	ACAAATACTTACTTATCCTTTTTG	2
AAACTCTAAAGAACTTTCATTTC	1	AATGAAAGTTCTTTAGAGTTTCA	1			AAGACTGCGCTAGGCTTGTTGTTT	2	ACAACAAGCCTAGCGCAGTCTTTT	1
AAGCTGTAAGAGCATCTTCATTAG	1	AATGAAGATGCTCTTACAGCTTGA	1			AAAAAAGCTCTTTCTTGGTTGTCG	1	ACAACCAAGAAAGAGCTTTTTTAC	2
AAAATTTTTGTACCGCTTCATTGA	1	AATGAAGCGGTACAAAAATTTTGA	77			AAGTATCGCCTCTGTTCGTTGTAC	91	ACAACGAACAGAGGCGATACTTGA	22
AAATCTTGACAGCTTATTCATTAT	6	AATGAATAAGCTGTCAAGATTTCA	6			AAGAGTGACCACTAATCGTTGTTT	16	ACAACGATTAGTGGTCACTCTTGC	5
AAACATGTTGTCATCATTCATTAA	5	AATGAATGATGACAACATGTTTAT	1			AAACCGTAGAATTTGCAGTTGTAG	23	ACAACTGCAAATTCTACGGTTTCC	2
AAGGATGTCAAATTTGGTCATTCA	2	AATGACCAAATTTGACATCCTTAT	1			AAACACCAAAAGCTCTCTTGTAA	1	ACAAGAGAGCTTTTGGTGTTTTT	1
AAATAGGGGTAAAATGGTCATTAA	3	AATGACCATTTTACCCCTATTTGT	1			AAAGCCCTTTAAAATCTCTTGTAC	1	ACAAGAGATTTTAAAGGGCTTTAA	17
AAGCAGTGTAGCGGTCATTTA	3	AATGACCGCTACACTGCTTAT	13			AATTATGCGTGGAAGATCTTGTCC	1	ACAAGATCTTCCACGCATAATTAA	1
AAACCAGTCGTCATCGTCATTTC	1	AATGACGATGACGACTGGTTTCC	1			AAATGTAATGATGGCTTGTAG	5	ACAAGCCATCATTACATTTCT	1
AATCGCCTTAGAAAACGTCATTAT	16	AATGACGTTTTCTAAGGCGATTAT	1			AAGTTTGTGAACTCATCCTTGTCG	2	ACAAGGATGAGTTCACAAACTTTT	2
AACAGAGGGTATTTTAGTCATTTA	5	AATGACTAAAATACCCTCTGTTAA	5			AAATGCTTTTAAAAATCCTTGTAA	1	ACAAGGATTTTTAAAAGCATTTTT	3
AATATGGCAAGCTCTAGTCATTAT	2	AATGACTAGAGCTTGCCATATTGT	2			AAATGCTTTTAAAAATCCTTGTAA	1	ACAAGGATTTTTAAAAGCATTTGT	1
AACAAAGTTTATCTAAGTCATTGC	2	AATGACTTAGATAAACTTTGTTGG	2			AAATGCTTTTAAAAATCCTTGTAA	1	ACAAGGATTTTTAAAAGCATTTCT	1
AAACTGCGAATGGCTCATTAA	50	AATGAGCCATTCGCAGTTTCA	2			AAAACCTTTAAAAAATCCTTGTAA	1	ACAAGGATTTTTTAAAGGTTTTAA	1
AATCACAGCTTGACACCTCATTAA	3	AATGAGGTGTCAAGCTGTGATTAA	3			AAGCGCGGTGCGATCTACTTGTAA	14	ACAAGTAGATCGCACCGCGCTTAG	14
AACCACAGCTTGACACCTCATTAA	7	AATGAGGTGTCAAGCTGTGGTTAA	10			AAGAATGTAGCAATTGACTTGTTA	1	ACAAGTCAATTGCTACATTCTTAT	3
AACTCCCGCAAACGCACTCATTAC	2	AATGAGTGCGTTTGCGGGAGTTTT	1			AATGAATAGAGCGCCACTTGTCA	4	ACAAGTGGCGCTCTATTCATTCG	1
AACCATTACAACCCAACTCATTTT	3	AATGAGTTGGGTTGTAATGGTTAA	386			AAGTAGAGATACTAATTATTGTTG	2	ACAATAATTAGTATCTCTACTTCA	1
AACCATTACAACCCAACTCATTTT	3	AATGAGTTGGGTTGTAATGGTTTA	1			AAAAGCCAGGGGCAGGTATTGTAA	2	ACAATACCTGCCCCTGGCTTTTAA	1
AACACTTCACCGGATCATTCA	11	AATGATCCGGTGAAGTGTTCG	29			AACCAGCGACAACATATATTGTTC	1	ACAATATATGTTGTCGCTGGTTGT	2
AAGATCAGAACAATGCATCATTTG	1	AATGATGCATTGTTCTGATCTTCA	1			AACCAGCGACAACATATATTGTTC	1	ACAATATATGTTGTCGCTGGTTGC	1
AACAAAATCCGTAAGCATCATTAT	1	AATGATGCTTACGGATTTTGTTTA	3			AAACTACACTATGTTTGATTGTTT	3	ACAATCAAACATAGTGTAGTTTAG	1
AACAGCATCGTCCATCATTGA	27	AATGATGGACGATGCTGTTGA	4			AACAATGTTTGTGCTGATTGTCT	2	ACAATCAGCACAAACATTGTTTA	1
AAGAAGTAGCGGTGTAATCATTAT	2	AATGATTACACCGCTACTTCTTAA	1			AACAATGTCCGTGCTGATTGTCT	5	ACAATCAGCACGGACATTGTTTA	36
AACTAAGAGGGAGAAAATCATTGC	1	AATGATTTTCTCCCTCTTAGTTAA	2			AAACAATGTCCGTGCTGATTGTCT	22	ACAATCAGCACGGACATTGTTTAA	19
AAGAAGCTGAAGCAAAATCATTAT	6	AATGATTTTGCTTCAGCTTCTTCG	1			AAGCCCGAAAAAAACTGATTGTTC	1	ACAATCAGTTTTTTTCGGGCTTTA	1
AAGGTTGAGAATATATTGCATTGT	10	AATGCAATATATTCTCAACCTTAA	1			AACCATGAGGTTGATGATTGTCT	7	ACAATCATCAACCTCATGGTTGG	1
AAAGAATATATACGATTGCATTGC	6	AATGCAATCGTATATATTCTTTTT	3			AAAAACCAAATAAACCGATTGTCC	2	ACAATCGGTTTATTTGGTTTTTAT	1
AAAGAATAGATACGATTGCATTGC	11	AATGCAATCGTATCTATTCTTTTT	1			AATGCTTCTGATTCATTGTCC	16	ACAATGAATCAGAAGCATTCC	3
AAGTAATCAGGTCGTCTGCATTTC	76	AATGCAGACGACCTGATTACTTGT	14			AAAATCCAGTGGCAGCCATTGTAA	1	ACAATGGCTGCCACTGGATTTTAA	4
AAAAGGTGTGCGTTTAGGCATTAA	1	AATGCCTAAACGCACACCTTTTGG	1			AAAATCCAGTGACAGCCATTGTAA	2	ACAATGGCTGTCACTGGATTTTAA	1
AACGCTCTTGATCTGTCGCATTTG	3	AATGCGACAGATCAAGAGCGTTAG	1			AAAAGCCAGTGACAGCCATTGTAA	1	ACAATGGCTGTCACTGGCTTTTAT	1
AAATCAACCAATCATACGCATTCT	2	AATGCGTATGATTGGTTGATTTTA	1			AACCAGCGACAAATTACATTGTTC	2	ACAATGTAATTTGTCGCTGGTTAA	1
AACAGAACCTCTTCATAGCATTAC	1	AATGCTATGAAGAGGTTCTGTTTA	3			AACCAGCGACTACATACATTGTTC	1	ACAATGTATGTAGTCGCTGGTTGC	8
AAAGTCAATCTAATGCAGCATTAT	1	AATGCTGCATTAGATTGACTTTGT	11			AACTTCCGATGTGGGACATTGTCC	1	ACAATGTCCCACATCGGAAGTTGA	1
AAAGTCAATTCAATGCAGCATTAT	1	AATGCTGCATTGAATTGACTTTGT	1			ACAATCAGCACGGACATTGTTT	1	ACAATGTCCGTGCTGATTGTCT	1
AAGTAAAGACTTGTCAAGCATTAA	2	AATGCTTGACAAGTCTTTACTTTA	1			AAAGAGTGCTTGAAATTGTCG	71	ACAATTTCAAGCACTCTTTGA	10
AAACGAAGAGAATTTTTCCATTCT	1	AATGGAAAAATTCTCTTCGTTTGA	1			AAAGTCCAAAAAAAATTGTTG	1	ACAATTTTTTTTGGACTTTTT	17
AACTCCTTTGTTTTCCATTTC	1	AATGGAAAACAAAGGAGTTAG	2			AACATATGGAGTTCTTTTGTGTCA	1	ACACAAAAGAACTCCATATGTTAT	2
AATAACTTTTCTGTTGTCCATTTT	1	AATGGACAACAGAAAAGTTATTGC	5			AACTGTCAAAGCTGTGTTGTGTTA	3	ACACAACACAGCTTTGACAGTTAC	8
AAGGTTCGATGACGTGTCCATTTC	1	AATGGACACGTCATCGAACCTTAA	1			AAACCGAAATCAAGTGTTGTGTGG	1	ACACAACACTTGATTTCGGTTTAG	3
AACTATACACTTTATGTCCATTTG	1	AATGGACATAAAGTGTATAGTTAG	1			AAATCCGTGTACGTCGTTGTGTCT	1	ACACAACGACGTACACGGATTTGG	1
AAAATATCTCCACATCTCCATTGT	1	AATGGAGATGTGGAGATATTTTGG	1			AAAGGGTGTGAACGATCTGTGTCC	1	ACACAGATCGTTCACACCCTTTGC	4
AACATACTCTCTTCTATCCATTGA	2	AATGGATAGAAGAGAGTATGTTGG	1			AAAAACTCCATGACTACTGTGTAA	1	ACACAGTAGTCATGGAGTTTTTGG	1
AAGTGGCAATGAAGGATCCATTTT	5	AATGGATCCTTCATTGCCACTTGT	1			AATGATTGAGAGACTATGTGTAT	7	ACACATAGTCTCTCAATCATTAC	1
AATAGAAAATCAGCATCCATTCA	1	AATGGATGCTGATTTTCTATTCA	2			AATGATTGAGAGACTATGTGTGT	1	ACACATAGTCTCTCAATCATTAC	1
AAGTTTCCTTGACTATGCCATTTT	2	AATGGCATAGTCAAGGAAACTTTG	1			AAGCTCTTATGTGCTGATGTGTCA	4	ACACATCAGCACATAAGAGCTTGC	1
AAGTTTCTTTGACTTGGCCATTTT	1	AATGGCCAAGTCAAAGAAACTTAA	1			AAGCTCTCATGTGCTGATGTGTCA	15	ACACATCAGCACATGAGAGCTTGC	2
AACAACGCTCCTAACAGCCATTAC	3	AATGGCTGTTAGGAGCGTTGTTAA	3			AATACGGTGGTAGTAATGTGTGT	3	ACACATTACTACCACCGTATTTG	2
AAAGCTGTGTTGTGTTACCATTCA	2	AATGGTAACACAACACAGCTTTGA	1			AAACCCGTCTGACTCCTGGTGTGG	1	ACACCAGGAGTCAGACGGGTTTAT	1
AAAGCTGTATTGTGTTACCATTCA	1	AATGGTAACACAATACAGCTTTAT	1			AAGCCGCGGGCATGGGTGTAA	1	ACACCCATGCCCGCGGCTTCT	2
AACTAAGCGTTGACTACCATTTA	9	AATGGTAGTCAACGCTTAGTTCA	4			AATCTATTGAACATCGTGTTT	10	ACACGATGTTCAATAGATTTA	48
AACTAAACGTTGACTACCATTTA	5	AATGGTAGTCAACGTTTAGTTCA	1			AATTGTCCTGTACGAAGCGTGTGA	4	ACACGCTTCGTACAGGACAATTAA	2
AACACTCCCCTTGATGACCATTAT	2	AATGGTCATCAAGGGGAGTGTTAT	4			AATGGTCATCAAGGGGGAGTGTTA	10	ACACTCCCCCTTGATGACCATTAT	1
AACACTCTCCCTGATGACCATTAT	6	AATGGTCATCAGGGAGAGTGTTAT	4			AATTCGAGATAAGCAGTGTAG	8	ACACTGCTTATCTCGAATTTG	1
AACACTCCCCCTGATGACCATTAT	51	AATGGTCATCAGGGGGAGTGTTAT	7			AAATTCGAGATAAGCAGTGTAG	5	ACACTGCTTATCTCGAATTTGG	1
AACGGACCATCTGCAGACCATTTT	13	AATGGTCTGCAGATGGTCCGTTGC	7			AAAATCGCATCGCAACAGTGTTG	1	ACACTGTTGCGATGCGATTTTGG	1
AAACCTTTCCGCATGCACCATTAT	1	AATGGTGCATGCGGAAAGGTTTAA	10			AAGCGGGCCACTCATCAAGTGTGT	1	ACACTTGATGAGTGGCCCGCTTTT	3
AACCTCTCCGCATACACCATTAT	1	AATGGTGTATGCGGAGAGGTTTA	2			AATGTTCACAAACTGCAAGTGTAT	1	ACACTTGCAGTTTGTGAACATTTA	2
AATCCCCAAAATTAACCATTGA	9	AATGGTTAATTTTGGGGATTTT	3			AAGAGAGAAACCTAAAAGTGTTA	1	ACACTTTTAGGTTTCTCTCTTTA	4
AAAATCCCCAAAATTAACCATTGA	10	AATGGTTAATTTTGGGGATTTTGT	6			AAGAGAGAAACCTAAAAGTGTTA	1	ACACTTTTAGGTTTCTCTCTTTG	3
AATAGAACACTTTAAAACCATTAG	1	AATGGTTTTAAAGTGTTCTATTGT	1			AAAGAGAGAAACCTAAAAGTGTTA	1	ACACTTTTAGGTTTCTCTCTTTGC	2
AATGAAGGAAAAAAAAACCATTGG	1	AATGGTTTTTTTTTCCTTCATTTT	1			AAGACCGAGATGAGTTTTCTGTGC	1	ACAGAAAACTCATCTCGGTCTTAT	1
AAAGGCCCGAAAAAGTACATTTA	2	AATGTACTTTTTCGGGCCTTTTA	3			AAAGTAAGATGATTTCTGTAA	4	ACAGAAATCATCTTACTTTAT	2
AAAGGCCCGAAAAAGTACATTTA	2	AATGTACTTTTTCGGGCCTTTTC	1			AATATATATGGAGAGTCTTCTGTCA	3	ACAGAAGACTCTCCATATATATTGG	3
AAAGGCCCGAAAAAGTACATTAA	1	AATGTACTTTTTCGGGCCTTTTA	3			AATGACCTTTATAGCCTTCTGTTG	1	ACAGAAGGCTATAAAGGTCATTCA	1
AAAGGCCCGAAAAAGTACATTAA	1	AATGTACTTTTTCGGGCCTTTTC	1			AAGGGTTATTTGGTCATTCTGTTC	2	ACAGAATGACCAAATAACCCTTAT	3
AAAAGGCCCGAAAAAGTACATTTA	1	AATGTACTTTTTCGGGCCTTTTTG	1			AAGGGTAATTTGGTCATTCTGTTC	3	ACAGAATGACCAAATTACCCTTAT	3
AAAAGGCCCGAAAAAGTACATTTA	1	AATGTACTTTTTCGGGCCTTTTAA	1			AAGAGTAATTTGGTCATTCTGTTC	1	ACAGAATGACCAAATTACTCTTAT	26
AAAGGTTTAGAGCATCTACATTGC	1	AATGTAGATGCTCTAAACCTTTCA	1			AAAGGACCACCACATTGTCTGTTC	2	ACAGACAATGTGGTGGTCCTTTAA	1
AAAAGTTATAGAGTCATACATTTT	2	AATGTATGACTCTATAACTTTTAG	2			AAAGGACCACCACATTGTCTGTTC	2	ACAGACAATGTGGTGGTCCTTTGG	1
AAAGAATTGAGAGAATGACATTGT	83	AATGTCATTCTCTCAATTCTTTTC	1			AAGGACCACCACACTGTCTGTCC	1	ACAGACAGTGTGGTGGTCCTTCA	13
AAAAATTATATGTTCGGACATTGT	28	AATGTCCGAACATATAATTTTTGT	1			AAGGACCACCACACTGTCTGTCC	1	ACAGACAGTGTGGTGGTCCTTCG	1
AAAAATTATATGTTCGGACATTAT	2	AATGTCCGAACATATAATTTTTGT	1			AAGAAAGAGCTCTCAGTCTGTCA	1	ACAGACTGAGAGCTCTTTCTTGA	2
AAGACAATCAGCACGGACATTGT	44	AATGTCCGTGCTGATTGTCTTGC	2			AAGGTTCTGAACCGAAGTCTGTAA	36	ACAGACTTCGGTTCAGAACCTTCT	1
AAACGAACAACACAGCGACATTTA	1	AATGTCGCTGTGTTGTTCGTTTGA	1			AAAGGGTGGTCCAAGTCTCTGTAT	1	ACAGAGACTTGGACCACCCTTTAG	2
AACCGGTGTCTCCTCAGACATTTC	1	AATGTCTGAGGAGACACCGGTTCC	1			AATAACTAAAATGCCCTCTGTTA	1	ACAGAGGGCATTTTAGTTATTTA	6
AAGTGTCTAAACGTGTCACATTCC	1	AATGTGACACGTTTAGACACTTTT	1			AATGACTAAAATACCCTCTGTTA	3	ACAGAGGGTATTTTAGTCATTTA	1
AACTATATGTGTGACTCACATTGT	3	AATGTGAGTCACACATATAGTTAT	1			AAATGACTAAAATACCCTCTGTTA	5	ACAGAGGGTATTTTAGTCATTTAT	1
AAGAGTTGCATCTACCACATTCA	2	AATGTGGTAGATGCAACTCTTTT	5			AAACCCTTGCAGCATCTGTTT	17	ACAGATGCTGCAAGGGTTTGG	1
AAAGAGTTGCATCTACCACATTCA	13	AATGTGGTAGATGCAACTCTTTTT	189			AAAGTGCCATGCAGAATCTGTTG	2	ACAGATTCTGCATGGCACTTTGA	11
AACAGATACAGTGTTTAACATTAC	2	AATGTTAAACACTGTATCTGTTAC	1			ACACAACTTTGGAAAAATCTGTAT	1	ACAGATTTTTCCAAAGTTGTGTGA	2
AAGAAGAGCATGGATGAACATTAA	4	AATGTTCATCCATGCTCTTCTTTT	1			AAGATTTATTTACAATGGCTGTCA	1	ACAGCCATTGTAAATAAATCTTAA	2
AAACAGCCTAAGCCCAACATTTC	3	AATGTTGGGCTTAGGCTGTTTCC	1			AAGTACAAGTGTATGGCGCTGTTG	8	ACAGCGCCATACACTTGTACTTGA	1
AATGATGGCGGAAATTTTAATTGT	2	AATTAAAATTTCCGCCATCATTTG	1			AAATGCCAGTGACAGCCGCTGTAA	1	ACAGCGGCTGTCACTGGCATTTAA	34
AACGGATTTTAAAAGGTTAATTAA	7	AATTAACCTTTTAAAATCCGTTGT	1			ACAAATGTAAAGTGTACGCTGTAT	1	ACAGCGTACACTTTACATTTGTAT	1
AACACATACATATTTCTTAATTAA	1	AATTAAGAAATATGTATGTGTTGG	2			AACGACGTCATTTTGAGCTGTTA	2	ACAGCTCAAAATGACGTCGTTTA	14
AATGATTGTAAAGTGCTTAATTAC	2	AATTAAGCACTTTACAATCATTAG	4			AAACGACGTCATTTTGAGCTGTTA	4	ACAGCTCAAAATGACGTCGTTTAA	1
AACCCACCCATTTGAATTAATTGT	2	AATTAATTCAAATGGGTGGGTTTT	3			AAACGACGTCATTTTGAGCTGTTA	4	ACAGCTCAAAATGACGTCGTTTTA	1
AATGACGTGGCGGCTTGTAATTAG	15	AATTACAAGCCGCCACGTCATTAG	1			AACGAATTACTTGTCAGCTGTCA	2	ACAGCTGACAAGTAATTCGTTGA	1
AATGACGTGGCGACTTGTAATTAG	40	AATTACAAGTCGCCACGTCATTAG	4			AAGGTCCTGTTCTTTTGCCTGTCG	1	ACAGGCAAAAGAACAGGACCTTAA	1
AATGGAGGGTATAATTGTAATTTT	2	AATTACAATTATACCCTCCATTAA	1			AACCATTGTCTAGAAGCCTGTTT	1	ACAGGCTTCTAGACAATGGTTTA	5
AAACGAATAGAACTCTGTAATTGA	1	AATTACAGAGTTCTATTCGTTTAC	1			AACCGCACCGCAACAGTACTGTAA	1	ACAGTACTGTTGCGGTGCGGTTTT	2
AACAATGAAAACGCATGTAATTTG	1	AATTACATGCGTTTTCATTGTTTC	1			AAGCCGACTCTGATGCTACTGTGG	1	ACAGTAGCATCAGAGTCGGCTTTC	10
AAAGAGTAGAGTAAGGGTAATTAG	1	AATTACCCTTACTCTACTCTTTTG	1			AAAGTGGGTCAATGGCTACTGTGT	6	ACAGTAGCCATTGACCCACTTTTA	1
AATCCATCGGTTCACGGTAATTTC	2	AATTACCGTGAACCGATGGATTGA	1			AAAGTGGATCAATGGCTACTGTGT	23	ACAGTAGCCATTGATCCACTTTTA	2
AATCTCTACTCTATCGTAATTTA	1	AATTACGATAGAGTAGAGATTTT	1			AAGTGGGTCAACGGCTACTGTGC	3	ACAGTAGCCGTTGACCCACTTTT	2
AAACGATAATTTTGTAGTAATTAA	1	AATTACTACAAAATTATCGTTTTT	1			AAGTGGGTCAACGGCTACTGTAC	1	ACAGTAGCCGTTGACCCACTTTT	2
AAACAACCATTATACAGTAATTTT	1	AATTACTGTATAATGGTTGTTTGG	12			AAAGTGGGTCAACGGCTACTGTGC	13	ACAGTAGCCGTTGACCCACTTTTA	7
AAACAACCATTATACAGTAATTTT	1	AATTACTGTATAATGGTTGTTTCT	1			AAAGTGGGTCAACGGCTACTGTGC	13	ACAGTAGCCGTTGACCCACTTTTC	2
AAAGTGTTTATTTTCTAATTTT	1	AATTAGAAAATAAACACTTTTA	1			AAAGTGGGTCAACGGCTACTGTAC	1	ACAGTAGCCGTTGACCCACTTTTA	7
AATGATTGTGAAGTGTCTAATTAC	6	AATTAGACACTTCACAATCATTAG	3			AAAGTGGGTCAACGGCTACTGTAC	1	ACAGTAGCCGTTGACCCACTTTTC	2
AAAATGATTGTCAGATCTAATTCA	24	AATTAGATCTGACAATCATTTTGA	16			AAAGTGAGTCAACGGCTACTGTGC	5	ACAGTAGCCGTTGACTCACTTTTA	8
AACCCGCAGTACACCGCTAATTTA	2	AATTAGCGGTGTACTGCGGGTTTT	1			AAGTTTGCATGCCGATACTGTTA	3	ACAGTATCGGCATGCAAACTTTT	6
AATGATTGTGAAGTGCCTAATTAC	34	AATTAGGCACTTCACAATCATTAG	9			AATGTCACGACGGATTCACTGTTA	3	ACAGTGAATCCGTCGTGACATTAC	2
AATCCAATGCATTTGACTAATTAT	2	AATTAGTCAAATGCATTGGATTGT	6			AATGGACTAGTCAGATCACTGTGT	2	ACAGTGATCTGACTAGTCCATTGG	2
AATCCAATGCATTTGACTAATTAT	2	AATTAGTCAAATGCATTGGATTAT	1			AAAATTGCCTCCGTTCAACTGTTC	1	ACAGTTGAACGGAGGCAATTTTGA	6
AATCCAATGCATTTGACTAATTCT	1	AATTAGTCAAATGCATTGGATTGT	6			AACTTCCTTTAGACGAAACTGTGA	1	ACAGTTTCGTCTAAAGGAAGTTTT	1
AATCCAATGCATTTGACTAATTCT	1	AATTAGTCAAATGCATTGGATTAT	1			AACTTGTTTCCGATCGTTATGTGA	2	ACATAACGATCGGAAACAAGTTGA	4
AATCCAATGCATTCGACTAATTAT	1	AATTAGTCGAATGCATTGGATTGT	1			AAAATTTCTAAAATCGTTATGTTA	4	ACATAACGATTTTAGAAATTTTAC	1
AAGAGTTGTAGCAGATATAATTTA	7	AATTATATCTGCTACAACTCTTAA	3			AACCGCATCATATCACTTATGTAA	2	ACATAAGTGATATGATGCGGTTGG	5
AAGGATTTTACTGTGCATAATTTT	1	AATTATGCACAGTAAAATCCTTGG	1			AAACGTTGTTTATGAATTATGTGC	1	ACATAATTCATAAACAACGTTTGT	1
AACCAAATTTGACAGCATAATTAA	8	AATTATGCTGTCAAATTTGGTTAT	2			AAAATACTGACCAACCGTATGTTG	1	ACATACGGTTGGTCAGTATTTTCG	2
AATGACTTAGCATGACATAATTAT	17	AATTATGTCATGCTAAGTCATTTT	1			ACACTATGCGTTCACACTATGTGT	1	ACATAGTGTGAACGCATAGTGTGA	1
AAGTAAGTAGCATAGAATAATTTA	9	AATTATTCTATGCTACTTACTTAC	1			AACCGCATCACATCATATATGTAA	1	ACATATATGATGTGATGCGGTTAG	1
AACGATACAATACTTTTGAATTAC	1	AATTCAAAAGTATTGTATCGTTAG	3			AAGCTCTCATGTGCTGATATGTCA	10	ACATATCAGCACATGAGAGCTTGC	2
AAGCCGGAAGAAACAGTGAATTCT	22	AATTCACTGTTTCTTCCGGCTTAA	5			AAATGCAACAGTAACGATATGTAG	3	ACATATCGTTACTGTTGCATTTGT	1
AAGCCGGAAGAAACAGTGAATTCT	22	AATTCACTGTTTCTTCCGGCTTAT	3			AAAGACGACACTTAAGATATGTAT	43	ACATATCTTAAGTGTCGTCTTTCC	192
AAAATGAACAAGCGGATGAATTTT	670	AATTCATCCGCTTGTTCATTTTAT	2			AACCGCATCACATCACATATGTAA	1	ACATATGTGATGTGATGCGGTTGA	2
AAATTTCGGACCTAAGGGAATTAC	1	AATTCCCTTAGGTCCGAAATTTGT	2			AATTTTTAGGCAAGGAATATGTGT	1	ACATATTCCTTGCCTAAAAATTAG	1
AAAAATGCTTAATTGTAGAATTTT	1	AATTCTACAATTAAGCATTTTTAA	1			AAGTCTATCGATCAGATGTTG	1	ACATCTGATCGATAGACTTGA	3
AAAGATAGAACGATAGAGAATTAA	1	AATTCTCTATCGTTCTATCTTTCT	1			AAGGCAGCGTCTGCGTCATGTAG	1	ACATGACGCAGACGCTGCCTTTG	2
AATCTAGACGCAACAGAGAATTTC	1	AATTCTCTGTTGCGTCTAGATTTT	1			AAAGGCAGCGTCTGCGTCATGTAG	21	ACATGACGCAGACGCTGCCTTTGA	7
AACACCATAACTACACAGAATTCG	2	AATTCTGTGTAGTTATGGTGTTAT	2			AAAGGCAGCGTCTGCGTCATGTAA	2	ACATGACGCAGACGCTGCCTTTGA	7
AACGACGACATAATCAAGAATTTG	2	AATTCTTGATTATGTCGTCGTTGT	1			AAGATGGTTCTGATGCTCATGTAA	1	ACATGAGCATCAGAACCATCTTTG	2
AAGAGTTTTGTGGTATTCAATTAA	5	AATTGAATACCACAAAACTCTTAC	1			ACAAGAGACTTTTTTTGCATGTAT	72	ACATGCAAAAAAAGTCTCTTGTGA	4
AAATGAGTTATTGGGTCAATTGG	1	AATTGACCCAATAACTCATTTGA	1			AACTTATTGGCCTTTTGCATGTAA	1	ACATGCAAAAGGCCAATAAGTTCT	10
AAAGATGATCTTTGAGTCAATTAA	2	AATTGACTCAAAGATCATCTTTAT	1			AAATAGAAATGGCGATGCATGTGA	12	ACATGCATCGCCATTTCTATTTTA	9
AACTAAACGTTGACTGCCAATTAA	1	AATTGGCAGTCAACGTTTAGTTCA	2			AAGACAAGTAAGAGCATGTCC	2	ACATGCTCTTACTTGTCTTGT	1
AAAACTGATCATATGCCCAATTGG	1	AATTGGGCATATGATCAGTTTTGT	1			AAATCAAGCAAAGCATCCATGTCT	1	ACATGGATGCTTTGCTTGATTTCT	1
AAAGGCTGGAGAGTATACAATTTT	1	AATTGTATACTCTCCAGCCTTTCT	1			AATGTGTTTCTGACTACCATGTAA	1	ACATGGTAGTCAGAAACACATTAT	2
AAATCTCCAACGATATACAATTAT	1	AATTGTATATCGTTGGAGATTTCC	1			AACGATCAGATGTTTACATGTAT	1	ACATGTAAACATCTGATCGTTTG	398
AACAGTTGATGATACAATTAT	14	AATTGTATCATCAACTGTTCA	5			AACGATCAGATGTTTACATGTAT	1	ACATGTAAACATCTGATCGTTTA	29
AACGAACAACACAGCGACAATTAT	21	AATTGTCGCTGTGTTGTTCGTTTG	2			AACGATCAGATGTTTACATGTAT	1	ACATGTAAACATCTGATCGTTTT	2
AATCATAGTCTACACAATTTT	1	AATTGTGTAGACTATGATTAA	3			AAACGATCAGATGTTTACATGTAT	19	ACATGTAAACATCTGATCGTTTGA	1607
AACGACGACGAATGACACAATTCA	2	AATTGTGTCATTCGTCGTCGTTGT	1			AAACGATCAGATGTTTACATGTAT	19	ACATGTAAACATCTGATCGTTTAA	10
AACACTTTTTGCCTCTTAAATTTT	1	AATTTAAGAGGCAAAAAGTGTTGG	2			AAACGATCGGATCTTTACATGTGT	1	ACATGTAAAGATCCGATCGTTTGA	40
AAATGATGTACACCAGTAAATTAA	1	AATTTACTGGTGTACATCATTTCG	1			AACGATCAGATGTGTACATGTCA	2	ACATGTACACATCTGATCGTTTG	6
AAAGACTGTATCCTAAATTTC	5	AATTTAGGATACAGTCTTTAT	3			AAACGATCAGATGTGTACATGTCA	5	ACATGTACACATCTGATCGTTTGA	16
AATAAAGACTGTATCCTAAATTTC	18	AATTTAGGATACAGTCTTTATTAG	3			AAACGATCAGATGTGTACATGTGT	1	ACATGTACACATCTGATCGTTTGA	16
AAACAGAAACAATTACTAAATTAT	1	AATTTAGTAATTGTTTCTGTTTAT	1			ACAGGCTCGACTCTACACATGTGC	1	ACATGTGTAGAGTCGAGCCTGTAT	2
AAAAGCATATTCCCGATAAATTAA	1	AATTTATCGGGAATATGCTTTTAG	1			AAAATGGGCCGAAATAACATGTTA	1	ACATGTTATTTCGGCCCATTTTTA	1
AACTGAACCGCGATCTGAAATTAG	1	AATTTCAGATCGCGGTTCAGTTGT	3			AACGGCACCAATACGGCAATGTCA	3	ACATTGCCGTATTGGTGCCGTTGG	3
AAAGATCTTAGGTATGGAAATTAC	1	AATTTCCATACCTAAGATCTTTCT	1			AACATGATTAGGGACAATGTTT	44	ACATTGTCCCTAATCATGTTTT	1
AAATATGCATCGCGCGGAAATTAA	2	AATTTCCGCGCGATGCATATTTTG	1			AACCGGCAGGAGGAGGAAATGTTT	6	ACATTTCCTCCTCCTGCCGGTTAT	1
AAACGTCCAAACGAAGGAAATTAT	1	AATTTCCTTCGTTTGGACGTTTTA	4			AATCACGGACGATGTTTTGGTTA	17	ACCAAAACATCGTCCGTGATTAG	1
AAATGACGCTTGAAAGGAAATTAA	4	AATTTCCTTTCAAGCGTCATTTAA	1			AATATATTCGTCGTCTTTTGGTAC	1	ACCAAAAGACGACGAATATATTGA	1
AACCATGCTCAGACACGAAATTAC	1	AATTTCGTGTCTGAGCATGGTTTA	1			AAGTTCTCCTGGCTTTTGGTGA	1	ACCAAAAGCCAGGAGAACTTGA	15
AAATTGATTCATCGGAGAAATTGT	1	AATTTCTCCGATGAATCAATTTCA	1			AACGACTGGTTGAGCGTTTGGTAA	27	ACCAAACGCTCAACCAGTCGTTCA	1
AATCAACACCGTCTGTCAAATTAA	1	AATTTGACAGACGGTGTTGATTAT	2			AACGACTGGTTGAGCGTTTGGTTA	7	ACCAAACGCTCAACCAGTCGTTCA	1
AAAACTACCTACTTTGCAAATTAT	1	AATTTGCAAAGTAGGTAGTTTTTT	6			AACTTCGTCCGTCGGCTTTGGTTT	2	ACCAAAGCCGACGGACGAAGTTAA	2
AATCTCATATATCACGCAAATTTC	1	AATTTGCGTGATATATGAGATTGA	2			AATTGAGCTAACGACACTTGGTAT	2	ACCAAGTGTCGTTAGCTCAATTAG	1
AATCCCATATATCACGCAAATTTC	2	AATTTGCGTGATATATGGGATTAG	2			ACAAATGATGGGTCTGATTGGTAA	2	ACCAATCAGACCCATCATTTGTTA	1
AATCCCATATATCACGCAAATTTC	2	AATTTGCGTGATATATGGGATTAT	1			AAGTATGAAGTTTATGATTGGTGT	2	ACCAATCATAAACTTCATACTTCA	1
AATCCCATATATCACGCAAATTTC	2	AATTTGCGTGATATATGGGATTGA	1			AATGTCGTTAGCTCAATTGGTAA	1	ACCAATTGAGCTAACGACATTTA	1
AAATCAAAATTGAGGCCAAATTAG	1	AATTTGGCCTCAATTTTGATTTTA	1			AACTAATATTATATGCTGTGGTTT	1	ACCACAGCATATAATATTAGTTTA	1
AACTAGTATAGGGCTGAAAATTAA	1	AATTTTCAGCCCTATACTAGTTAA	1			AATTGTCTCATGGATTCGTGGTAT	26	ACCACGAATCCATGAGACAATTGT	1
AACGATGTCTCAACTGAAAATTGG	1	AATTTTCAGTTGAGACATCGTTTT	1			AATTGTCTCATAGATTCGTGGTAT	12	ACCACGAATCTATGAGACAATTGT	1
AATCTGATCCAGTATGAAAATTAA	1	AATTTTCATACTGGATCAGATTGC	5			AAGCATTTGTGGTCCAGTGGTAG	1	ACCACTGGACCACAAATGCTTGG	1
AAACAAGGTAGGGATGAAAATTAA	2	AATTTTCATCCCTACCTTGTTTAT	1			AAAAGTTACAGCTGTATCTGGTAT	1	ACCAGATACAGCTGTAACTTTTGG	1
AAGCTCAACGTTCTGGAAAATTGC	1	AATTTTCCAGAACGTTGAGCTTCA	1			AATTACTATCGCACCCGCTGGTTT	1	ACCAGCGGGTGCGATAGTAATTAA	16
AAACATGGTCGGAAAATTGA	1	AATTTTCCGACCATGTTTAA	1			AAAGAGATGAATCTAACCTGGTGT	5	ACCAGGTTAGATTCATCTCTTTTG	1
AACTTTCATATTCCTCAAAATTAC	2	AATTTTGAGGAATATGAAAGTTGA	19			AATATGCTTGTCCATGACTGGTTC	1	ACCAGTCATGGACAAGCATATTAT	1
AAAAATGAATCCGGCCAAAATTGA	4	AATTTTGGCCGGATTCATTTTTAA	2			AACCGCTTTCATATCCACTGGTTT	1	ACCAGTGGATATGAAAGCGGTTAA	15
AACGCAAAACTTTAACAAAATTTT	1	AATTTTGTTAAAGTTTTGCGTTAT	1			ACACCCGACCGGTTCAACTGGTTC	1	ACCAGTTGAACCGGTCGGGTGTGG	1
AAATACATATCTTTTTTTTTGTCT	2	ACAAAAAAAAAGATATGTATTTAT	3			AAGTGCGTTCGGCTCATATGGTAC	2	ACCATATGAGCCGAACGCACTTTT	1
AACGGCGATCATTTTTTGTTA	1	ACAAAAAATGATCGCCGTTAA	1			AAGATTTAGGGATGAAGATGGTCT	7	ACCATCTTCATCCCTAAATCTTTA	1
AATCTCTTGTGATATATTTTGTGA	1	ACAAAATATATCACAAGAGATTCT	1			AATGAGTTGGGTTGTAATGGTTA	780	ACCATTACAACCCAACTCATTTT	1
AAGGGCAGAAGCGTCATTTTGTAA	1	ACAAAATGACGCTTCTGCCCTTGC	2			AATGAGTTGGGTTGTAATGGTTT	31	ACCATTACAACCCAACTCATTTT	1
AAGAATTAAAATGCTCGTTTGTAA	1	ACAAACGAGCATTTTAATTCTTAA	1			AATTCTGTGTAGTTCTAATGGTAT	22	ACCATTAGAACTACACAGAATTCC	7
AAGTAGATTCTGTACCGTTTGTAA	4	ACAAACGGTACAGAATCTACTTAT	17			ACAAATTAAGGCTGTGAATGGTAA	67	ACCATTCACAGCCTTAATTTGTTA	1
AAGATTTGCTCTCACCGTTTGTCA	1	ACAAACGGTGAGAGCAAATCTTTT	1			AATGAAACCGGCAAGGAATGGTAC	1	ACCATTCCTTGCCGGTTTCATTAG	1
AAAGCGGTATCTAGCAGTTTGTAT	3	ACAAACTGCTAGATACCGCTTTGG	1			AATGGTTAATGGTTTCAATGGTTT	2	ACCATTGAAACCATTAACCATTAC	2
AATAAATAGGTAGAAACTTTGTAG	5	ACAAAGTTTCTACCTATTTATTCT	2			AATGGTTAATGGTTTCAATGGTTT	2	ACCATTGAAACCATTAACCATTAT	1
AAAGCTACCCTTCATTTGTTGTAA	4	ACAACAAATGAAGGGTAGCTTTGT	1			AACCGTGAACTTTTGAAATGGTCG	1	ACCATTTCAAAAGTTCACGGTTAA	2
AAGACTGCGCTAGGCTTGTTGTTT	2	ACAACAAGCCTAGCGCAGTCTTTT	1			AACCGTGAACTCTTGAAATGGTCG	4	ACCATTTCAAGAGTTCACGGTTAA	1
AATAACTGTCAATTTTGGTTGTAA	2	ACAACCAAAATTGACAGTTATTAC	1			AACAATGAATGAAAATGGTAA	1	ACCATTTTCATTCATTGTTTG	48
AAGTATCGCCTCTGTTCGTTGTAC	135	ACAACGAACAGAGGCGATACTTGA	25			AAACAATGAATGAAAATGGTAA	12	ACCATTTTCATTCATTGTTTGT	26
AATTCTCCATCATTGTCGTTGTGA	3	ACAACGACAATGATGGAGAATTCA	2			ACAAACAATGAATGAAAATGGTAA	35	ACCATTTTCATTCATTGTTTGTCG	59
AAGAGTGACCACTAATCGTTGTTT	12	ACAACGATTAGTGGTCACTCTTGC	4			AAAAAGGTAGTAAAAAAATGGTAG	2	ACCATTTTTTTACTACCTTTTTGC	1
AAGTACACATAAAACGCGTTGTAC	1	ACAACGCGTTTTATGTGTACTTTG	1			AAAACGCGGTTTGGATTTGGGTAG	1	ACCCAAATCCAAACCGCGTTTTCT	1
AAACCGTAGAATTTGCAGTTGTAG	28	ACAACTGCAAATTCTACGGTTTCC	1			AATGATAAAAACTAAGTTGGGTAC	1	ACCCAACTTAGTTTTTATCATTTT	1
AAGGAGACGCAACTAAAGTTGTTT	2	ACAACTTTAGTTGCGTCTCCTTCA	1			AAATCGTTCGTCTGACTTGGGTAT	628	ACCCAAGTCAGACGAACGATTTGC	5
AATCCCTTTTAAAATCTCTTGTAA	1	ACAAGAGATTTTAAAAGGGATTAA	1			AAGAGAAATTGACAGGTGGGTAG	1	ACCCACCTGTCAATTTCTCTTTT	1
AAACCCTTTTAAAATCTCTTGTAA	5	ACAAGAGATTTTAAAAGGGTTTTA	2			ACACGAGATCGTGCTGCTGGGTGT	9	ACCCAGCAGCACGATCTCGTGTAA	1
AAACCCTTTAAAAATCTCTTGTAA	1	ACAAGAGATTTTTAAAGGGTTTTA	1			AAGCGAATTGTCATGATGGGTTG	6	ACCCATCATGACAATTCGCTTCT	1
AAAACCCTTTAAAAACTCTTGTAA	1	ACAAGAGTTTTTAAAGGGTTTTCT	2			AATAGGTTTCTGAGGATGGGTTA	42	ACCCATCCTCAGAAACCTATTCA	1
AAAACCCTTTAAAAACTCTTGTAA	1	ACAAGAGTTTTTAAAGGGTTTTCA	1			AATATCTAAGACCATATGGGGTAT	1	ACCCCATATGGTCTTAGATATTGA	1
AATCCCTAAAACACTATCTTGTCG	1	ACAAGATAGTGTTTTAGGGATTAA	1			AAGAGCTTGTATGAGACGGGGTAA	3	ACCCCGTCTCATACAAGCTCTTGC	5
ACAAATACTCTTCAGATCTTGTTC	1	ACAAGATCTGAAGAGTATTTGTAT	2			AAAGCATGTCGTAACTAGGGGTGT	3	ACCCCTAGTTACGACATGCTTTTA	1
AATTATGCGTGGAAGATCTTGTCC	1	ACAAGATCTTCCACGCATAATTAA	3			AACGATTTCAGGGTAAAGGGGTAA	4	ACCCCTTTACCCTGAAATCGTTGG	13
AAACTCTGAAAGGCAAGCTTGTAA	1	ACAAGCTTGCCTTTCAGAGTTTTC	1			AACGATTTCAGGGTAAAGGGGTAA	4	ACCCCTTTACCCTGAAATCGTTAG	2
AAGCCTAAGTAGTGTTTCCTTGTTA	1	ACAAGGAAACACTACTTAGGCTTTA	1			ACATCTATTTGGGCTTTAGGGTAT	8	ACCCTAAAGCCCAAATAGATGTCT	2
AAGTTTGTGAACTCATCCTTGTCG	1	ACAAGGATGAGTTCACAAACTTTT	1			AACGGTGGTTCTTTAACAGGGTCT	1	ACCCTGTTAAAGAACCACCGTTGG	17
AAAGCCATTTAAAATCCCTTGTAA	1	ACAAGGGATTTTAAATGGCTTTAA	1			AACATCATCTCTCTGTAAGGGTAA	1	ACCCTTACAGAGAGATGATGTTGC	1
AAGCATAAACTCTGGACCTTGTGA	4	ACAAGGTCCAGAGTTTATGCTTTA	1			AAACAGATGCTGCAAGGGTTT	3	ACCCTTGCAGCATCTGTTTTG	7
AAGCGCGGTGCGATCTACTTGTAA	31	ACAAGTAGATCGCACCGCGCTTAG	10			AAAACAGATGCTGCAAGGGTTT	5	ACCCTTGCAGCATCTGTTTTGA	6
AAGTTCCGGTTTACTGTATTGTTT	1	ACAATACAGTAAACCGGAACTTAT	1			AAAATAACGAACAAGAAAGGGTAT	2	ACCCTTTCTTGTTCGTTATTTTAA	1
AAATACGCGACGGGGTATTGTAA	6	ACAATACCCCGTCGCGTATTTAA	1			AATACGCGTTGGTTCAAAGGGTAA	2	ACCCTTTGAACCAACGCGTATTAC	2
AACCTTTGTGCCCCTATATTGTGT	1	ACAATATAGGGGCACAAAGGTTAT	1			AAAATGAACGGTGTAAAAGGGTAT	2	ACCCTTTTACACCGTTCATTTTTA	1
AACCAGCGACAACATATATTGTTC	4	ACAATATATGTTGTCGCTGGTTGT	1			AACGATTTCAGGGTAAAAGGGTAA	4	ACCCTTTTACCCTGAAATCGTTGG	12
AACAATGTCGGTGCTGATTGTCT	2	ACAATCAGCACCGACATTGTTTA	2			AACGATTTCAGGGTAAAAGGGTAA	4	ACCCTTTTACCCTGAAATCGTTTG	1
AATGTCCGTGCTGATTGTCT	1	ACAATCAGCACGGACATTGT	3			AAAATGGACAACATAAAAGGGTAT	19	ACCCTTTTATGTTGTCCATTTTTA	1
AACAATGTCCGTGCTGATTGTCT	1	ACAATCAGCACGGACATTGTTTA	32			AAAATGGTAAATAGAAAAGGGTAG	5	ACCCTTTTCTATTTACCATTTTCA	1
AAACAATGTCCGTGCTGATTGTCT	12	ACAATCAGCACGGACATTGTTTAA	19			AAGGGTATGGTTGCAAAAGGGTAT	1	ACCCTTTTGCAACCATACCCTTTT	1
AAACAATGTCCGTGCTGATTGTCT	12	ACAATCAGCACGGACATTGTTTAG	1			AAAATGGACAACACAAAAGGGTAT	22	ACCCTTTTGTGTTGTCCATTTTTA	1
AATGCTTCTGATTCATTGTCC	10	ACAATGAATCAGAAGCATTCC	3			AAAGAGTAGTAAAAAAAGGGTAG	1	ACCCTTTTTTTACTACTCTTTTG	1
AATATCTCCACATCTCCATTGTTG	1	ACAATGGAGATGTGGAGATATTTT	6			AAAGTCCACTTATCTTTTCGGTCA	2	ACCGAAAAGATAAGTGGACTTTGA	1
AAATCCAGTGACAGCCATTGTAA	1	ACAATGGCTGTCACTGGATTTTA	1			AATCTTCGGGTTCGGTTTCGGTTC	5	ACCGAAACCGAACCCGAAGATTTA	1
AAAATCCACTGACAGCCATTGTAA	1	ACAATGGCTGTCAGTGGATTTTAA	1			ACAGTAAAACTTCGATTTCGGTAT	6	ACCGAAATCGAAGTTTTACTGTGT	1
AACCAGCGACAAATTACATTGTTC	6	ACAATGTAATTTGTCGCTGGTTAA	1			AATCTTCGTGTTCGTGTTCGGTTT	1	ACCGAACACGAACACGAAGATTTA	1
AATAACCTATGCTCTACATTGTGA	1	ACAATGTAGAGCATAGGTTATTAC	6			ACATTGCACGGTACGGTTCGGTTA	1	ACCGAACCGTACCGTGCAATGTAT	1
AACCAGCGACTACATACATTGTTC	1	ACAATGTATGTAGTCGCTGGTTGC	3			AACTTAGCCTTGGGAGTTCGGTGA	3	ACCGAACTCCCAAGGCTAAGTTAA	1
AACTTCCGATGTGGGACATTGTCC	2	ACAATGTCCCACATCGGAAGTTGA	1			AACGATCAAGAACTTCGGTAT	1	ACCGAAGTTCTTGATCGTTGT	1
AAGACAATCAGCACGGACATTGTTT	4	ACAATGTCCGTGCTGATTGTCTTGC	1			ACCCACGGGTATTAGATTCGGTTC	6	ACCGAATCTAATACCCGTGGGTAC	1
AATAACGGTTGGAAGGAATTGTTC	1	ACAATTCCTTCCAACCGTTATTAG	2			AATCAGTAGATCAAAATTCGGTAA	1	ACCGAATTTTGATCTACTGATTTA	1
AAAGAGTGCTTGAAATTGTCG	31	ACAATTTCAAGCACTCTTTGA	6			AAAGCCAGTCATTGTCGGTCA	4	ACCGACAATGACTGGCTTTAT	1
AAGGAGAGGGCACTTTTTGTGTTG	7	ACACAAAAAGTGCCCTCTCCTTAT	2			AATTATCGGTTAACTGGTCGGTTC	71	ACCGACCAGTTAACCGATAATTTT	1
AAAGTAGGTTAAAGTTTTGTGTTA	1	ACACAAAACTTTAACCTACTTTAA	1			AATTATCGGTTAACTGGTCGGTTC	71	ACCGACCAGTTAACCGATAATTAT	1
AAGTCAGTAAAAGTTTTGTGTTA	1	ACACAAAACTTTTACTGACTTTA	1			AATTATCGGTTAACTGGTCGGTTT	1	ACCGACCAGTTAACCGATAATTTT	1
AACTGTCAAAGCTGTGTTGTGTTA	1	ACACAACACAGCTTTGACAGTTAC	9			AATTATCGGTTAACTGGTCGGTTT	1	ACCGACCAGTTAACCGATAATTAT	1
AAACCGAAATCAAGTGTTGTGTGG	2	ACACAACACTTGATTTCGGTTTAG	4			ACACCCCTGTCCGACGGTCGGTAT	1	ACCGACCGTCGGACAGGGGTGTGC	2
AATGTTATAAGGAGCATTGTGTGC	1	ACACAATGCTCCTTATAACATTAT	1			AAAAGCCCACCACACCGTCGGTTC	9	ACCGACGGTGTGGTGGGCTTTTAG	3
AAAGATAGAGCTGCAGGTGTGTTG	3	ACACACCTGCAGCTCTATCTTTAG	1			AATCTCTCTGGTTTAAGTCGGTAT	2	ACCGACTTAAACCAGAGAGATTGT	2
AAACCGAAATCAAGTGCTGTGTGG	4	ACACAGCACTTGATTTCGGTTTAG	1			AATAGTCCGCGCTCTGCTCGGTCA	1	ACCGAGCAGAGCGCGGACTATTTA	1
AAACCGAAATCAAGTGCTGTGTGA	1	ACACAGCACTTGATTTCGGTTTAG	1			AAATGTCATAAAAATCATCGGTTT	3	ACCGATGATTTTTATGACATTTTT	1
AAAACATGTTTGGTCGCTGTGTAC	1	ACACAGCGACCAAACATGTTTTCC	1			ACAGGAATCCAAACTTTGCGGTCT	1	ACCGCAAAGTTTGGATTCCTGTCA	1
AAATAGTTGCTGAATACTGTGTGC	2	ACACAGTATTCAGCAACTATTTAA	2			AATGTATTTCTGACTTGCGGTTT	1	ACCGCAAGTCAGAAATACATTTT	1
AACTTGTGAGTAAGTGATGTGTGG	11	ACACATCACTTACTCACAAGTTAA	2			AACGGTCTAATTTATCTGCGGTTT	2	ACCGCAGATAAATTAGACCGTTTT	2
AAGCTCTCATGTGCTGATGTGTCA	26	ACACATCAGCACATGAGAGCTTGC	1			AATCCCGATTTCCCGCTGCGGTAT	1	ACCGCAGCGGGAAATCGGGATTTT	1
AAACTCTCATGTGCTGATGTGTCA	2	ACACATCAGCACATGAGAGTTTGC	1			AAAATATAAGTCTACCTGCGGTAT	1	ACCGCAGGTAGACTTATATTTTAG	12
AACGATCAGATGTTTACATGTGTCA	1	ACACATGTAAACATCTGATCGTTTA	1			AAAGTATAAGCCTACCTGCGGTAT	1	ACCGCAGGTAGGCTTATACTTTAG	3
AACCCCGGTCTACATGTGTAT	1	ACACATGTAGACCGGGGTTAA	6			AAAATATAAGCCTACCTGCGGTAT	9	ACCGCAGGTAGGCTTATATTTTAG	66
AATACGGTGGTAGTAATGTGTGT	1	ACACATTACTACCACCGTATTTG	1			AACGAACAAATAAACCTGCGGTTG	1	ACCGCAGGTTTATTTGTTCGTTTT	1
AAATACGGTGGTAGTAATGTGTGT	15	ACACATTACTACCACCGTATTTGA	1			AAATAAATTGATTGTCCGCGGTAA	4	ACCGCGGACAATCAATTTATTTGG	1
AATATTGTTTTGAATGTGTTC	1	ACACATTCAAAACAATATTCA	1			AAATAAACCGATTGTCCGCGGTAA	1	ACCGCGGACAATCGGTTTATTTGG	15
AACCGCATCGCAACAGTGGTGTAA	1	ACACCACTGTTGCGATGCGGTTTT	1			AAATAAACCGATTGTCCGCGGTAA	1	ACCGCGGACAATCGGTTTATTTGA	8
AAGTCCGTCTGGCTTATGGTGTAT	1	ACACCATAAGCCAGACGGACTTGA	1			AAAAATGAATTGTCTCCGCGGTGT	9	ACCGCGGAGACAATTCATTTTTTA	1
AACGCTGAATCGAAGGGGGTGTTA	2	ACACCCCCTTCGATTCAGCGTTAA	1			AAAAATGAATTGTCTCCGCGGTAC	1	ACCGCGGAGACAATTCATTTTTTA	1
AAACATGGTCAACGGGTGTGA	2	ACACCCGTTGACCATGTTTTA	1			AAGTATAAATTGTCTCCGCGGTAT	2	ACCGCGGAGACAATTTATACTTTA	1
AATGGAAGGACCATGAGGGTGTAG	19	ACACCCTCATGGTCCTTCCATTGA	1			AAAGATAAATTGTCTCCGCGGTGT	1	ACCGCGGAGACAATTTATCTTTTT	1
AAATGAATTGTCTCCGCGGTGTAC	1	ACACCGCGGAGACAATTCATTTTT	8			AAAAATAAATTGTCTCCGCGGTAT	3	ACCGCGGAGACAATTTATTTTTTA	1
AATTTCATGCAATCCAGGTGTTA	1	ACACCTGGATTGCATGAAATTGG	2			AAAAATAAATTGTCTCCGCGGTAT	3	ACCGCGGAGACAATTTATTTTTTT	1
AATCTATTGAACATCGTGTTT	19	ACACGATGTTCAATAGATTTA	81			AAAAATAAATTGTCTCCGCGGTAT	3	ACCGCGGAGACAATTTATTTTTAA	1
AAGGATTGACTATGAATCGTGTCT	1	ACACGATTCATAGTCAATCCTTAT	2			AAAAATAAATTGTCTCCGCGGTGT	2	ACCGCGGAGACAATTTATTTTTTA	1
AAATCACAGTGCCTCCGCGTGTAT	1	ACACGCGGAGGCACTGTGATTTCT	2			AAAAATAAATTGTCTCCGCGGTGT	2	ACCGCGGAGACAATTTATTTTTTT	1
AATTGTCCTGTACGAAGCGTGTGA	1	ACACGCTTCGTACAGGACAATTAA	3			AAAAATAAATTGTCTCCGCGGTGT	2	ACCGCGGAGACAATTTATTTTTAA	1
AAACTAGATCATAACCCGTGTTA	1	ACACGGGTTATGATCTAGTTTTC	1			AAAAATGAACTGTCTCCGCGGTGT	5	ACCGCGGAGACAGTTCATTTTTAA	1
AACGATCGTGCTGATAACGTGTTA	1	ACACGTTATCAGCACGATCGTTTC	1			AATGTAAATTTAACTCCGCGGTAC	1	ACCGCGGAGTTAAATTTACATTAT	1
AATGGTCATCAAGGGGGAGTGTTA	11	ACACTCCCCCTTGATGACCATTAT	3			ACAAAATAAATCGTCCCGCGGTAT	19	ACCGCGGGACGATTTATTTTGTAA	1
AAATTCGAGATAAGCAGTGTAG	2	ACACTGCTTATCTCGAATTTGG	2			AAAAATAAATCGTCCCGCGGTAT	3	ACCGCGGGACGATTTATTTTTTA	3
ACACCAAGCAGGTATACAGTGTGA	2	ACACTGTATACCTGCTTGGTGTCT	1			AAAAATAAATCGTCCCGCGGTAT	3	ACCGCGGGACGATTTATTTTTTG	1
AAATACATATCTTAAGTGTCG	2	ACACTTAAGATATGTATTTAT	1			AAAAAATAAATCGTCCCGCGGTAT	85	ACCGCGGGACGATTTATTTTTTTT	1
AAGCCTGTAAAACTTGAAGTGTGC	1	ACACTTCAAGTTTTACAGGCTTAC	1			AAAAAATAAATCGTCCCGCGGTAT	85	ACCGCGGGACGATTTATTTTTTAA	1
AAGGTCGCGAACGTAGAAGTGTGA	1	ACACTTCTACGTTCGCGACCTTCA	1			AAATAAACCGATTGCCCGCGGTAA	2	ACCGCGGGCAATCGGTTTATTTGG	6
AATAACAGAGTTAAGTTTCTGTTA	1	ACAGAAACTTAACTCTGTTATTGT	2			AAATAAACCGATTGCCCGCGGTAA	2	ACCGCGGGCAATCGGTTTATTTAG	5
AAAGTAAGATGATTTCTGTAA	3	ACAGAAATCATCTTACTTTAT	2			AAATATAAATTGTCCCCGCGGTGT	3	ACCGCGGGGACAATTTATATTTTA	1
AACTCTCCCCCACAATTTCTGTCT	1	ACAGAAATTGTGGGGGAGAGTTAA	1			AAAAATATAGCCCCGCGGTAC	1	ACCGCGGGGCTATATTTTTAA	1
AATATATATGGAGAGTCTTCTGTCA	1	ACAGAAGACTCTCCATATATATTGG	5			AAAGATAAATTGTCACCGCGGTAT	3	ACCGCGGTGACAATTTATCTTTTT	1
AAGGGTAATTTGGTCATTCTGTTC	4	ACAGAATGACCAAATTACCCTTAT	2			AAATCCAAAAATAAACCGCGGTGT	2	ACCGCGGTTTATTTTTGGATTTTT	2
AAAGGACCACCACATTGTCTGTTC	1	ACAGACAATGTGGTGGTCCTTTAA	2			AAAGAGTGTAGGTTGCAGCGGTAG	78	ACCGCTGCAACCTACACTCTTTAT	1
AAAGGACCACCACATTGTCTGTTC	1	ACAGACAATGTGGTGGTCCTTTGG	1			AATAAACTTGGTCTGCAGCGGTTT	3	ACCGCTGCAGACCAAGTTTATTTG	1
AAGGACTACCATACTGTCTGTTC	2	ACAGACAGTATGGTAGTCCTTCG	6			AACATCCAAACCCCTAAGCGGTGT	1	ACCGCTTAGGGGTTTGGATGTTCT	5
AAGGACCACCACACTGTCTGTCC	1	ACAGACAGTGTGGTGGTCCTTCA	18			AACAAAAGACCCCGGTTCCGGTGC	1	ACCGGAACCGGGGTCTTTTGTTTT	1
AAGGACCACCACACTGTCTGTCC	1	ACAGACAGTGTGGTGGTCCTTCG	1			ACAGATCGTAGGTACTTCCGGTAT	8	ACCGGAAGTACCTACGATCTGTAT	2
AAACAAGCAAATAAATCTCTGTAA	1	ACAGAGATTTATTTGCTTGTTTTA	1			AAACGAACTTCCAACTTCCGGTGA	1	ACCGGAAGTTGGAAGTTCGTTTGT	9
AATAACTAAAATGCCCTCTGTTA	2	ACAGAGGGCATTTTAGTTATTTA	8			ACCATAGACATACAATTCCGGTAC	1	ACCGGAATTGTATGTCTATGGTGT	1
AAATGACTAAAATACCCTCTGTTA	3	ACAGAGGGTATTTTAGTCATTTAT	1			AATCCGATCGACGTTCTCCGGTAT	3	ACCGGAGAACGTCGATCGGATTGG	2
AATCAAGAAGGCGCGTATCTGTAT	2	ACAGATACGCGCCTTCTTGATTAA	1			AAGCTGCATGATCTCCGGTAA	1	ACCGGAGATCATGCAGCTTGA	1
AAACCCTTGCAGCATCTGTTT	10	ACAGATGCTGCAAGGGTTTGG	4			AACTGAACTTCGACGCTCCGGTAC	16	ACCGGAGCGTCGAAGTTCAGTTGG	4
AAAGTGCCATGCAGAATCTGTTG	4	ACAGATTCTGCATGGCACTTTGA	21			AACTGAACTTCGACGCTCCGGTAT	3	ACCGGAGCGTCGAAGTTCAGTTGG	4
AAAAGTTAACTCCAATCTGTCC	1	ACAGATTGGAGTTAACTTTTAT	6			ACAAAACAAATCAACCTCCGGTAT	1	ACCGGAGGTTGATTTGTTTTGTTA	1
AAAATATAAGCCTACCTGCTGTAT	2	ACAGCAGGTAGGCTTATATTTTAG	2			AAATCTCATCGACTGATCCGGTAT	7	ACCGGATCAGTCGATGAGATTTAT	1
AAGGAGATAACAAGATGCTGTTT	8	ACAGCATCTTGTTATCTCCTTCA	1			AAATCCTATCGACTAATCCGGTCA	1	ACCGGATTAGTCGATAGGATTTAT	1
ACAGACAACTGTATATCGCTGTTA	1	ACAGCGATATACAGTTGTCTGTAA	1			ACCAATCAACTCGCCGGTAC	3	ACCGGCGAGTTGATTGGTTT	2
AAGTACAAGTGTATGGCGCTGTTG	5	ACAGCGCCATACACTTGTACTTGA	2			AACCAATCAACTCGCCGGTAC	2	ACCGGCGAGTTGATTGGTTTT	1
AAATGCCAGTGACAGCCGCTGTAA	1	ACAGCGGCTGTCACTGGCATTTAA	5			AAACCAATCAACTCGCCGGTAC	1	ACCGGCGAGTTGATTGGTTTTA	5
AAATGCCAATGACAGCCGCTGTAA	4	ACAGCGGCTGTCATTGGCATTTAA	1			ACATGTGTTGGTCTTAGCCGGTAT	1	ACCGGCTAAGACCAACACATGTTT	1
ACAAATGTAAAGTGTACGCTGTGT	2	ACAGCGTACACTTTACATTTGTAT	1			AATTCCTCTGGTTTAAGCCGGTAT	1	ACCGGCTTAAACCAGAGGAATTAC	9
AAACGACGTCATTTTGAGCTGTTA	1	ACAGCTCAAAATGACGTCGTTTTA	2			AACATTTTTGTTGACCGGTGA	1	ACCGGTCAACAAAAATGTTAT	1
AATAACAGTAGAAGCCAGCTGTTC	7	ACAGCTGGCTTCTACTGTTATTGG	1			AACTCGTGACTCGGTGAACCGGTTG	1	ACCGGTTCACCGAGTCACGAGTTAA	1
ACAACAGTAGAAGCCAGCTGTTC	2	ACAGCTGGCTTCTACTGTTGTTA	2			AAAAGGAGCTAGAAACTACGGTAA	24	ACCGTAGTTTCTAGCTCCTTTTCC	1
AAATGGTAATTGTCAAAGCTGTAC	3	ACAGCTTTGACAATTACCATTTAC	4			AAATCGTCTTACAGTATACGGTAT	1	ACCGTATACTGTAAGACGATTTGT	3
AAGCCACAGTGTCTCTCCTGTTC	1	ACAGGAGAGACACTGTGGCTTTG	1			AACCGACGGTTTTGATACGGTTA	1	ACCGTATCAAAACCGTCGGTTAA	1
AAACCCTGAACTAAAACCTGTTA	1	ACAGGTTTTAGTTCAGGGTTTGT	1			AAGAACACATCACCGATACGGTTA	17	ACCGTATCGGTGATGTGTTCTTAA	4
AAAACCTCATTCCGTCTACTGTAC	1	ACAGTAGACGGAATGAGGTTTTCA	13			AACGGTCTGATCTATTGACGGTTG	6	ACCGTCAATAGATCAGACCGTTTT	1
AAGTGGGTCAATGGCTACTGTGT	1	ACAGTAGCCATTGACCCACTTTT	1			AACGATTTAATGGATGACGGTAA	1	ACCGTCATCCATTAAATCGTTGT	1
AAAGTGGATCAATGGCTACTGTGT	10	ACAGTAGCCATTGATCCACTTTTA	1			ACCATTTCAAGAGTTCACGGTTA	2	ACCGTGAACTCTTGAAATGGTCG	1
AAAGTGGGTCAACGGCTACTGTGC	3	ACAGTAGCCGTTGACCCACTTTTA	4			AACTGTAGTCATGCCTAACGGTGT	4	ACCGTTAGGCATGACTACAGTTAC	1
AAAGTGGGTCAACGGCTACTGTGC	3	ACAGTAGCCGTTGACCCACTTTTC	4			AAGAACCTGAGCCGTCAACGGTGT	1	ACCGTTGACGGCTCAGGTTCTTGG	1
AAAGTGGGTCAACGGCTACTGTAT	2	ACAGTAGCCGTTGACCCACTTTTA	4			AATTGTGCGAATCAACGGTTC	1	ACCGTTGATTCGCACAATTGG	1
AAAGTGGGTCAACGGCTACTGTAT	2	ACAGTAGCCGTTGACCCACTTTTC	4			AATTTTCGGATCCATCTTAGGTAT	9	ACCTAAGATGGATCCGAAAATTGC	1
AAAGTGGGTCAACGGCTACTGTAC	1	ACAGTAGCCGTTGACCCACTTTTA	4			AAAACATCGTCCGTGATTAGGTTG	64	ACCTAATCACGGACGATGTTTTGG	1
AAAGTGGGTCAACGGCTACTGTAC	1	ACAGTAGCCGTTGACCCACTTTTC	4			AAAACCGACTCTGAGATTAGGTAT	6	ACCTAATCTCAGAGTCGGTTTTTG	2
AAAGTGAGTCAACGGCTACTGTGC	1	ACAGTAGCCGTTGACTCACTTTTA	2			AAGACGGCCGCAAAATTAGGTTT	1	ACCTAATTTTGCGGCCGTCTTTA	1
AAAGTGGATCAACGGCTACTGTGC	1	ACAGTAGCCGTTGATCCACTTTTA	2			AAAGACGGCCGCAAAATTAGGTTT	3	ACCTAATTTTGCGGCCGTCTTTAG	1
AAGTTTGCATGCCGATACTGTTA	2	ACAGTATCGGCATGCAAACTTTT	2			ACCCCAGTCCAATTGTGTAGGTTA	1	ACCTACACAATTGGACTGGGGTTT	6
AAATGCCAGTGGTAGCGACTGTAA	2	ACAGTCGCTACCACTGGCATTTAA	2			AAAAGTTATTTGAGAAGTAGGTAG	2	ACCTACTTCTCAAATAACTTTTGA	1
AACGAACAGGGCCTTAGACTGTAT	7	ACAGTCTAAGGCCCTGTTCGTTTC	1			AACTTTTATTGTCTAGGTAA	2	ACCTAGACAATAAAAGTTAA	12
AATGTCACGACGGATTCACTGTTA	4	ACAGTGAATCCGTCGTGACATTAC	6			AACGGTTCCTCTCGTACTAGGTTG	1	ACCTAGTACGAGAGGAACCGTTGA	14
AAATCCAACACTAATCCACTGTTA	2	ACAGTGGATTAGTGTTGGATTTCA	9			AACATTATCATACAGCTGAGGTTT	1	ACCTCAGCTGTATGATAATGTTAA	1
AACCGAAGCGTTTATTAACTGTAA	1	ACAGTTAATAAACGCTTCGGTTAC	1			AATCCTGACACGGGGAGGTAG	6	ACCTCCCCGTGTCAGGATTGG	1
AAAATATGGCTCTGAAAACTGTGA	5	ACAGTTTTCAGAGCCATATTTTTC	1			ACACGAGGACTTCCCGGGAGGTCA	4	ACCTCCCGGGAAGTCCTCGTGTTG	3
AACTTGTTTCCGATCGTTATGTGA	3	ACATAACGATCGGAAACAAGTTGA	6			ACACGAGGACTTCCCGGGAGGTGA	1	ACCTCCCGGGAAGTCCTCGTGTTG	3
AATAACCGACGATCGTTATGTCA	1	ACATAACGATCGTCGGTTATTTC	1			AATCCAAAGACAAGAAGAGGTTT	1	ACCTCTTCTTGTCTTTGGATTTC	3
AAATTTCTAAAATCGTTATGTTA	2	ACATAACGATTTTAGAAATTTTA	1			AAGATTGTGCCACGTGTCAGGTCA	1	ACCTGACACGTGGCACAATCTTAT	10
AACCGCATCATATCACTTATGTAA	3	ACATAAGTGATATGATGCGGTTGG	3			AAGGCGGGACCTATATCAGGTTA	2	ACCTGATATAGGTCCCGCCTTTA	3
AACCGCATCATATCACTTATGTAA	3	ACATAAGTGATATGATGCGGTTTA	1			AAAGGCGGTACCTACACCAGGTTA	3	ACCTGGTGTAGGTACCGCCTTTGG	1
AACCGCATCATATCACTTATGTAA	3	ACATAAGTGATATGATGCGGTTAG	1			AACTTCCGAGGGACACACAGGTCG	1	ACCTGTGTGTCCCTCGGAAGTTTC	3
AACAACATCATATCACTTATGTAA	1	ACATAAGTGATATGATGTTGTTGG	5			AACAGAATATTGGAGAACAGGTGG	4	ACCTGTTCTCCAATATTCTGTTCC	1
AACCGTATCACATCACTTATGTAA	1	ACATAAGTGATGTGATACGGTTCG	2			AATGGATTTTTTTTCATAAGGTTC	2	ACCTTATGAAAAAAAATCCATTGG	1
AAGATCCGGAACTTTCGTATGTAC	2	ACATACGAAAGTTCCGGATCTTGT	2			AAAACAGAGAAATAAGGTAG	1	ACCTTATTTCTCTGTTTTAT	1
AAAGACTCTTTTCTCCGTATGTCT	1	ACATACGGAGAAAAGAGTCTTTAA	13			ACAGCGACGGGATTGAAGGTCG	3	ACCTTCAATCCCGTCGCTGTCA	9
ACAGGCAAGGGCGGAACTATGTTG	183	ACATAGTTCCGCCCTTGCCTGTAC	2			AAGTAGTTCGAGAGTAGAAGGTTC	1	ACCTTCTACTCTCGAACTACTTGT	1
AACCGCATCACATCATATATGTAA	1	ACATATATGATGTGATGCGGTTAG	1			AACCGCATCAGGTCTCCAAGGTGA	10	ACCTTGGAGACCTGATGCGGTTAT	1
AAATTAGGATGATTTGATATGTTT	4	ACATATCAAATCATCCTAATTTAG	1			ACAGTCAATCCTGCAGAAAGGTAC	3	ACCTTTCTGCAGGATTGACTGTGT	1
AAGCTCTCATGTGCTGATATGTCA	6	ACATATCAGCACATGAGAGCTTGC	1			ACAAAAAGAAACCATCAAAGGTAG	3	ACCTTTGATGGTTTCTTTTTGTTG	1
AAAGACGACACTTAAGATATGTAT	46	ACATATCTTAAGTGTCGTCTTTCC	42			AACATCCAAACCCCTAAAAGGTGT	1	ACCTTTTAGGGGTTTGGATGTTGT	32
AAAGATGCAGATCATATGTCC	2	ACATATGATCTGCATCTTTGC	2			AACCAGAACCAGAATAAAAGGTAG	8	ACCTTTTATTCTGGTTCTGGTTCT	1
AAGTTCTGATTGGATCTGATGTAT	1	ACATCAGATCCAATCAGAACTTCG	1			AATGCGGTATAGATGAAAAGGTGA	5	ACCTTTTCATCTATACCGCATTTG	1
AATGATGTATTTGAATGATGTTT	1	ACATCATTCAAATACATCATTTA	1			AACGCCTGACCCGACAAAAGGTAA	1	ACCTTTTGTCGGGTCAGGCGTTTA	10
AAATGGAAATGAAAAATGATGTTT	1	ACATCATTTTTCATTTCCATTTGG	1			AAGGGTATTGTTGAAAAAAGGTAG	6	ACCTTTTTTCAACAATACCCTTTT	1
AATTGGGTTGTATGGTGGATGTAT	1	ACATCCACCATACAACCCAATTCC	1			ACAAGTTGCACTCGTCTTTCGTCT	1	ACGAAAGACGAGTGCAACTTGTAG	1
AATTGGGTTATATGGTGGATGTAT	2	ACATCCACCATATAACCCAATTCC	1			AATTCATTCTGTAGTATTTCGTTG	1	ACGAAATACTACAGAATGAATTTC	1
AACAATGGTTGAGTGGAGATGTGC	5	ACATCTCCACTCAACCATTGTTAG	1			AACCGCAGGTTTCTTTGTTCGTTT	1	ACGAACAAAGAAACCTGCGGTTGC	51
AATAGAGTAAGGTTAGAGATGTCC	1	ACATCTCTAACCTTACTCTATTTT	1			ACCGTGACCAAAAGTTGTTCGTTT	1	ACGAACAACTTTTGGTCACGGTCG	1
AAGTCAAACGATCAGATGTTT	1	ACATCTGATCGTTTGACTTGA	19			ACAATACCCTTTCTTGTTCGTTA	1	ACGAACAAGAAAGGGTATTGTTG	1
ACAGAAAGCGACAACAGATGTAG	1	ACATCTGTTGTCGCTTTCTGTAG	1			ACAATTCATAAACAATGTTCGTCT	3	ACGAACATTGTTTATGAATTGTGT	1
AAGGCAGCGTCTGCGTCATGTAA	1	ACATGACGCAGACGCTGCCTTTG	2			AATTACTATCTTTCCGTTCGTCA	22	ACGAACGGAAAGATAGTAATTAA	2
AAGGCAGCGTCTGCGTCATGTAG	1	ACATGACGCAGACGCTGCCTTTG	2			AATGTCTTTTCTAGTTCGTCG	5	ACGAACTAGAAAAGACATTGG	9
AAAGGCAGCGTCTGCGTCATGTAG	32	ACATGACGCAGACGCTGCCTTTGA	2			AATGGGTGTTGCCAATCTTCGTGT	21	ACGAAGATTGGCAACACCCATTGC	1
AAAGGCAGCGTCTGCGTCATGTAA	11	ACATGACGCAGACGCTGCCTTTGA	2			ACCAAACACTATGATCATTCGTCC	1	ACGAATGATCATAGTGTTTGGTGT	1
AAGATGGTTCTGATGCTCATGTAA	7	ACATGAGCATCAGAACCATCTTTG	2			AAACCCGTCCCGCAAAATTCGTCC	1	ACGAATTTTGCGGGACGGGTTTGG	3
AATGAGTAGAGATGACTCATGTCT	1	ACATGAGTCATCTCTACTCATTCC	1			AAAGGTAGAATCGTGTTGTCGTGT	6	ACGACAACACGATTCTACCTTTAA	1
AAAGCCCGAAATCACATCATGTAA	1	ACATGATGTGATTTCGGGCTTTGG	1			AATCTACGAAAACGATTGTCGTTA	1	ACGACAATCGTTTTCGTAGATTAT	1
ACAAGAGACTTTTTTTGCATGTAT	56	ACATGCAAAAAAAGTCTCTTGTGA	1			AATACATATCTTAAGTGTCGTCT	1	ACGACACTTAAGATATGTATTTA	3
AACTTATTGGCCTTTTGCATGTAA	5	ACATGCAAAAGGCCAATAAGTTCT	8			AAATACATATCTTAAGTGTCGTCT	21	ACGACACTTAAGATATGTATTTAT	46
AAATAGAAATGGCGATGCATGTGA	12	ACATGCATCGCCATTTCTATTTTA	12			AATCTTCTCAAAGATCTGTCGTTT	3	ACGACAGATCTTTGAGAAGATTGA	1
AATCTCCAAATTCTAGGCATGTCT	1	ACATGCCTAGAATTTGGAGATTGT	1			AATAAAAATGTTGACCGGTCGTTT	2	ACGACCGGTCAACATTTTTATTAT	3
ACAAGACAAGTAAGAGCATGTCC	2	ACATGCTCTTACTTGTCTTGTTA	1			ACCTACCTCCACTATACGTCGTAC	10	ACGACGTATAGTGGAGGTAGGTGA	33
AACTAATCACAAGCTGCCATGTCA	6	ACATGGCAGCTTGTGATTAGTTGG	1			ACCTACCTCCACCATACGTCGTAC	3	ACGACGTATGGTGGAGGTAGGTGA	16
AATGTGTTTCTGACTACCATGTAA	2	ACATGGTAGTCAGAAACACATTAT	6			AATGAGATTTTCAAGTCGTCT	2	ACGACTTGAAAATCTCATTTA	5
AAACGATCAGGTGTTTACATGTGT	1	ACATGTAAACACCTGATCGTTTGA	81			AAGCGAACGCCGTAAAAGTCGTGT	2	ACGACTTTTACGGCGTTCGCTTAC	1
AAACGATCAGATGTTTACATGTAT	16	ACATGTAAACATCTGATCGTTTGA	2298			AAGGCCAATAAGTTCTCTCGTCA	1	ACGAGAGAACTTATTGGCCTTTT	6
AAACGATCAGATGTTTACATGTAT	16	ACATGTAAACATCTGATCGTTTAA	16			AAAGGCCAATAAGTTCTCTCGTCA	19	ACGAGAGAACTTATTGGCCTTTTG	27
AAACGATCAGATGTTTACATGTAT	16	ACATGTAAACATCTGATCGTTTTA	1			ACACCCAGCAGCACGATCTCGTGT	1	ACGAGATCGTGCTGCTGGGTGTTA	3
AAACGATCAGATGTTTACATGTGT	4	ACATGTAAACATCTGATCGTTTGA	2298			ACCTCTGTTAGGGTTTGCTCGTGG	12	ACGAGCAAACCCTAACAGAGGTCA	1
AAACGATCAGATGTTTACATGTGT	4	ACATGTAAACATCTGATCGTTTAA	16			AACGATATAACGCATCACTCGTAA	1	ACGAGTGATGCGTTATATCGTTGT	1
AAACGATCAGATGTTTACATGTGT	4	ACATGTAAACATCTGATCGTTTTA	1			AAAGTTCATACCGCTCTATCGTCG	3	ACGATAGAGCGGTATGAACTTTAA	2
AACGATCAGATGTGTACATGTCA	1	ACATGTACACATCTGATCGTTTG	14			ACATGTAAACATCTGATCGTTT	3	ACGATCAGATGTTTACATGTGT	1
AAACGATCAGATGTGTACATGTCA	5	ACATGTACACATCTGATCGTTTGA	32			ACACATGTAAACATCTGATCGTTT	1	ACGATCAGATGTTTACATGTGTCA	6
AAACGATCAGATGTGTACATGTGT	1	ACATGTACACATCTGATCGTTTGA	32			AACGATATTTATATCCGATCGTAA	1	ACGATCGGATATAAATATCGTTGG	1
AAACCCGTCCCGCCAAACATGTCC	1	ACATGTTTGGCGGGACGGGTTTGA	1			ACACATGTAAAGATCCGATCGTTT	1	ACGATCGGATCTTTACATGTGTCA	1
AATGCATACCATATAATGTAA	1	ACATTATATGGTATGCATTGT	1			AACACGTTATCAGCACGATCGTCT	2	ACGATCGTGCTGATAACGTGTTAT	1
AACGGCACCAATACGGCAATGTCA	3	ACATTGCCGTATTGGTGCCGTTGG	2			AAGTGAAGAATCTTAAGATCGTGG	5	ACGATCTTAAGATTCTTCACTTTC	2
AAAGCAAGCCCAAGCCCAATGTAA	1	ACATTGGGCTTGGGCTTGCTTTAG	1			AAGTGAAGAATCTTAAGATCGTAG	4	ACGATCTTAAGATTCTTCACTTTC	2
AACATATATGTCAGTACAATGTAA	2	ACATTGTACTGACATATATGTTAA	2			AAGTATAAGCCAACACATCGTCA	4	ACGATGTGTTGGCTTATACTTCA	2
AAAACATGATTAGGGACAATGTTT	8	ACATTGTCCCTAATCATGTTTTCC	1			AACTCGCAGGTAAGAGAATCGTTT	1	ACGATTCTCTTACCTGCGAGTTAT	1
AATCATAAGCCTATCACAATGTTG	1	ACATTGTGATAGGCTTATGATTAA	2			AAGAGGGTGCGTTGTCAATCGTTT	1	ACGATTGACAACGCACCCTCTTAT	1
AACAACCATTAGAGCACAATGTTT	2	ACATTGTGCTCTAATGGTTGTTGG	2			AAGTTCAAGATTAAATCGTCC	2	ACGATTTAATCTTGAACTTCA	3
AACCGGCGAACGACATAAATGTTT	1	ACATTTATGTCGTTCGCCGGTTTT	2			AACACAATCAAACATAAATCGTCT	1	ACGATTTATGTTTGATTGTGTTGA	1
AACCGGCAGGAGGAGGAAATGTTT	2	ACATTTCCTCCTCCTGCCGGTTAT	2			AATGCTATAATAGAGAAATCGTAG	2	ACGATTTCTCTATTATAGCATTAA	1
AAGAGAGAGAGTATTCAAATGTCT	1	ACATTTGAATACTCTCTCTCTTAT	1			ACAAGTCCAAAATGAAAATCGTAA	2	ACGATTTTCATTTTGGACTTGTGG	10
ACAGACTTTCCAAACAAATGTGA	2	ACATTTGTTTGGAAAGTCTGTCA	1			AACTTGCAGAATGAAAAATCGTAG	2	ACGATTTTTCATTCTGCAAGTTTT	1
AAGCGACGATCTGGCGTTTGGTCA	1	ACCAAACGCCAGATCGTCGCTTGC	1			AATGGACCCATGACATTTGCGTAA	5	ACGCAAATGTCATGGGTCCATTAC	1
AACTTCATCTGTCGGCTTTGGTTT	4	ACCAAAGCCGACAGATGAAGTTAA	2			AATCCCGTTTATCTCAGTGCGTCT	1	ACGCACTGAGATAAACGGGATTTA	13
AACTTCGTCCGTCGGCTTTGGTTT	7	ACCAAAGCCGACGGACGAAGTTAA	1			AATAAGGCGAGATCTGCGGCGTGA	1	ACGCCGCAGATCTCGCCTTATTTA	1
AAGAGGCTGTTAGGGATTTGGTTT	6	ACCAAATCCCTAACAGCCTCTTAT	1			AACCAAACAATCACGGCGTTA	1	ACGCCGTGATTGTTTGGTTGA	3
AAAGAAATTGGGGAAATTTGGTAT	1	ACCAAATTTCCCCAATTTCTTTCA	2			AACCGGATCTTAAAGGCGTAA	12	ACGCCTTTAAGATCCGGTTGC	10
AACGCAAAAATCGAGAGTTGGTAC	1	ACCAACTCTCGATTTTTGCGTTTC	1			AAGTGTATCAACATTTTCGCGTCA	1	ACGCGAAAATGTTGATACACTTGA	1
ACACATTTTTCGCCTATTGGTTA	1	ACCAATAGGCGAAAAATGTGTGG	1			ACCAAAACAGTCACTTCGCGTAT	1	ACGCGAAGTGACTGTTTTGGTTC	11
ACAAATGATGGGTCTGATTGGTAA	7	ACCAATCAGACCCATCATTTGTTA	1			AACCAAAACAGTCACTTCGCGTAT	1	ACGCGAAGTGACTGTTTTGGTTCC	3
AAGGTCATCATCTCCATTGGTGA	1	ACCAATGGAGATGATGACCTTAG	8			ACCCTACTGATGCCCGCGTCG	15	ACGCGGGCATCAGTAGGGTAA	1
AAGTGTCGTTAGCTCAATTGGTAA	117	ACCAATTGAGCTAACGACACTTAT	1			AACTCCGGCGAGACGTAGCGTTT	1	ACGCTACGTCTCGCCGGAGTTTA	2
AAGTGTCGTTAGCTCAATTGGTAA	117	ACCAATTGAGCTAACGACACTTGA	1			AAGTTCTTGGTTCAGTGAGCGTGG	1	ACGCTCACTGAACCAAGAACTTAA	2
AAGTGTCGTTAGCTCAATTGGTAT	10	ACCAATTGAGCTAACGACACTTAT	1			AAGTCTGTTGTGATTCAAGCGTAA	1	ACGCTTGAATCACAACAGACTTCG	1
AAGTGTCGTTAGCTCAATTGGTAT	10	ACCAATTGAGCTAACGACACTTGA	1			AAAAAGTAGTGTGGGCAAGCGTGA	2	ACGCTTGCCCACACTACTTTTTTT	1
AAGTGTCGTTAGCTAAATTGGTAA	2	ACCAATTTAGCTAACGACACTTGG	1			AAAGCTCCTTCCCGCAAGCGTTT	3	ACGCTTGCGGGAAGGAGCTTTTA	8
AACTAGCGGTGTCAAAATTGGTAA	2	ACCAATTTTGACACCGCTAGTTAT	1			AAAGCTCCTTCCCGCAAGCGTTT	3	ACGCTTGCGGGAAGGAGCTTTTG	1
AAGAGCGAAAAAGAGTGTGGTCT	1	ACCACACTCTTTTTCGCTCTTTA	1			AAAAGCTCCTTCCCGCAAGCGTTT	6	ACGCTTGCGGGAAGGAGCTTTTGA	1
AATTCGGGACAGACAGTGTGGTGG	11	ACCACACTGTCTGTCCCGAATTTG	1			AAAAGCACCTTCCCGCAAGCGTTT	2	ACGCTTGCGGGAAGGTGCTTTTGA	1
AACTAATATTACATGCTGTGGTTT	2	ACCACAGCATGTAATATTAGTTTC	2			AACCGCACCGTACTTTTTCCGTAC	2	ACGGAAAAAGTACGGTGCGGTTTA	10
ACAGACAGACAGTATGGTGGTTT	1	ACCACCATACTGTCTGTCTGTCA	1			AAGCATGTCGTTAAGTTTCCGTTA	1	ACGGAAACTTAACGACATGCTTAA	30
AACTGTCTCATGAATTCGTGGTGT	1	ACCACGAATTCATGAGACAGTTGT	2			AATCCTTACTCGACAGTTCCGTCC	1	ACGGAACTGTCGAGTAAGGATTGG	32
AAATAACGTTAAAAGTAGTGGTAT	1	ACCACTACTTTTAACGTTATTTTA	1			AATCCTTACTCGACAGTTCCGTCC	1	ACGGAACTGTCGAGTAAGGATTGA	15
AACGAACTATTGACCTAGTGGTAA	1	ACCACTAGGTCAATAGTTCGTTGG	3			AATCTGCATAGTATTTGTCCGTCT	3	ACGGACAAATACTATGCAGATTAA	20
AAAGTTATAGAGCAGTTCTGGTTA	19	ACCAGAACTGCTCTATAACTTTCA	2			AAGGTGAACGATCTGTGTCCGTCT	1	ACGGACACAGATCGTTCACCTTTT	1
AAAACATGTGAAAGTCTCTGGTCA	3	ACCAGAGACTTTCACATGTTTTGG	1			AACAAGTAATTTTGGGTCCGTAA	1	ACGGACCCAAAATTACTTGTTCA	15
AATGGTTATGGAAATCTCTGGTTT	1	ACCAGAGATTTCCATAACCATTTA	1			AAAAAGTAATTTTGGGTCCGTAA	1	ACGGACCCAAAATTACTTTTTCA	3
ACAATGTAATTTGTCGCTGGTTA	1	ACCAGCGACAAATTACATTGTTC	3			ACCACTTATTTTATCCGTCCGTTA	1	ACGGACGGATAAAATAAGTGGTGG	11
AATTACTATCGCACTCGCTGGTTT	1	ACCAGCGAGTGCGATAGTAATTAA	1			AATTAAGTCTAGGCCTCCGTTA	1	ACGGAGGCCTAGACTTAATTTA	2
AATTACTATCGCACCCGCTGGTTT	3	ACCAGCGGGTGCGATAGTAATTAA	3			ACAGCATCCGCCCACACTCCGTCT	1	ACGGAGTGTGGGCGGATGCTGTGC	22
AATTACTATCACACCCGCTGGTTT	1	ACCAGCGGGTGTGATAGTAATTAA	4			ACGCCAAACTGTGATCCGTCC	3	ACGGATCACAGTTTGGCGTCG	2
ACATCCGCTGATCCCTGGTCG	1	ACCAGGGATCAGCGGATGTTG	93			AACAAGAACTTAGGTGATCCGTCA	23	ACGGATCACCTAAGTTCTTGTTTA	1
AATGACGCGTCATGGGACTGGTTT	1	ACCAGTCCCATGACGCGTCATTTT	2			AACGACGATAGTACGGATCCGTAT	1	ACGGATCCGTACTATCGTCGTTAG	1
AATTACTATCGTACCCACTGGTTT	1	ACCAGTGGGTACGATAGTAATTAA	1			ACCTGTAAAAAGTGGAATCCGTAA	1	ACGGATTCCACTTTTTACAGGTTT	1
AACTGCGTGGTAACTGGTAT	1	ACCAGTTACCACGCAGTTGC	1			AAGTAACGTCCCGCCAATCCGTCC	1	ACGGATTGGCGGGACGTTACTTAA	2
AAGAATTATCGAAGTTTATGGTGG	1	ACCATAAACTTCGATAATTCTTAA	1			AAACCCGTCCCTCTAAATCCGTCT	1	ACGGATTTAGAGGGACGGGTTTTT	4
AAGTGCATTCGGGTCATATGGTAC	3	ACCATATGACCCGAATGCACTTTT	1			AACCCGTCCCTCCAAATCCGTCT	1	ACGGATTTGGAGGGACGGGTTTT	34
AAGTGCGTTCGGCTCATATGGTAC	1	ACCATATGAGCCGAACGCACTTTT	3			ACATATACATTTTTTTGCCGTCA	1	ACGGCAAAAAAATGTATATGTAG	1
AAGTGCATTCGGATCATATGGTAC	1	ACCATATGATCCGAATGCACTTTT	1			AATAAGTGAGCTAGGCCGTCA	3	ACGGCCTAGCTCACTTATTCT	2
ACAAGGACGTGGTTTGATGGTGG	1	ACCATCAAACCACGTCCTTGTTA	1			AACTTTCAAAATAATAGGCCGTCG	1	ACGGCCTATTATTTTGAAAGTTTC	1
AAGTTTTTGGGCATGGGATGGTTC	4	ACCATCCCATGCCCAAAAACTTGT	1			AACGAAGTACAATTATAGCCGTTC	1	ACGGCTATAATTGTACTTCGTTGT	1
AAATTTGTCCGATGGGGATGGTCT	2	ACCATCCCCATCGGACAAATTTAG	1			AAACAAACAGTAACTCAGCCGTCA	6	ACGGCTGAGTTACTGTTTGTTTGC	1
AAAACTGGATGGAGATGGTTG	1	ACCATCTCCATCCAGTTTTTC	1			AACTCGTAGATTATCGTCCCGTAT	1	ACGGGACGATAATCTACGAGTTAA	2
AAATGTGGACTCTGAAGATGGTTT	1030	ACCATCTTCAGAGTCCACATTTGG	1			ACACCATATAACCCCGTCCCGTGA	1	ACGGGACGGGGTTATATGGTGTGA	52
AATGACGAACAGAAAAGATGGTAA	5	ACCATCTTTTCTGTTCGTCATTAA	2			ACCGCATCGCACTTCTCCCGTAC	1	ACGGGAGAAGTGCGATGCGGTTC	1
ACAAACTTTCTTCTAACATGGTAT	1	ACCATGTTAGAAGAAAGTTTGTTA	1			AACCGCATCGCACTTCTCCCGTAC	1	ACGGGAGAAGTGCGATGCGGTTCA	6
AAATGAGTTGGGTTGTAATGGTTA	271	ACCATTACAACCCAACTCATTTGA	1			AACCGCACCGCACTTCTCCCGTAC	1	ACGGGAGAAGTGCGGTGCGGTTCA	8
AAATGAGTTGGGTTGTAATGGTTT	11	ACCATTACAACCCAACTCATTTGA	1			ACCCGCAATACAGTCCTCCCGTGT	1	ACGGGAGGACTGTATTGCGGGTGA	24
AATTCTGTGTAGTTCTAATGGTAT	62	ACCATTAGAACTACACAGAATTCC	1			ACAAAATAAACCGATGGCCCGTAG	1	ACGGGCCATCGGTTTATTTTGTTC	1
AACGTGTTATTGGCCTAATGGTAA	1	ACCATTAGGCCAATAACACGTTAG	1			AAGTTTTGTGCCGAAGCCCGTAA	1	ACGGGCTTCGGCACAAAACTTCC	6
AATCACAGTGTATGAATGGTGA	1	ACCATTCATACACTGTGATTAA	1			AACAATCAAAAATTTCACCCGTCG	1	ACGGGTGAAATTTTTGATTGTTAT	1
AATGGTTAATGGTTTCAATGGTTT	1	ACCATTGAAACCATTAACCATTAC	1			AAACCCGTTCCGCCAAACCCGTCC	1	ACGGGTTTGGCGGAACGGGTTTGG	28
ACATAAGAGCACCTCCAATGGTAT	1	ACCATTGGAGGTGCTCTTATGTCC	1			AAACCCGTTCCGCAAAACCCGTCC	1	ACGGGTTTTGCGGAACGGGTTTAG	3
AATGTTAATGTAGCTAAATGGTTG	3	ACCATTTAGCTACATTAACATTAT	1			AATATATAACGTTGTTTACCGTAA	2	ACGGTAAACAACGTTATATATTTT	1
AACCGTGAACTCTTGAAATGGTCG	2	ACCATTTCAAGAGTTCACGGTTAA	2			ACCCGCCGTCTACAGTACCGTCA	2	ACGGTACTGTAGACGGCGGGTGG	16
AACAATGAATGAAAATGGTAA	3	ACCATTTTCATTCATTGTTTG	5			AAGAAAAAGAAAAAAGTACCGTAA	1	ACGGTACTTTTTTCTTTTTCTTGC	1
AAACAATGAATGAAAATGGTAA	4	ACCATTTTCATTCATTGTTTGT	1			AAGTCAGCCGCAACATACCGTAA	1	ACGGTATGTTGCGGCTGACTTAC	3
ACAAACAATGAATGAAAATGGTAA	35	ACCATTTTCATTCATTGTTTGTCG	4			AAATACCGTTACTAAATACCGTTA	1	ACGGTATTTAGTAACGGTATTTAC	1
AAATCGTTCGTCTGACTTGGGTAT	601	ACCCAAGTCAGACGAACGATTTGC	3			AAGGAAAAAAGAGCAGACCGTTA	49	ACGGTCTGCTCTTTTTTCCTTCA	2
AAGCTATATAGGGGGGTGGGTGT	4	ACCCACCCCCCTATATAGCTTAA	1			ACCCAGAAGAAAAGCTCACCGTCC	1	ACGGTGAGCTTTTCTTCTGGGTTA	1
AAATAGGAGTGGCACCGTGGGTTG	18	ACCCACGGTGCCACTCCTATTTCC	2			AACGAGAATTCAAGGAAACCGTGC	9	ACGGTTTCCTTGAATTCTCGTTAT	1
ACACGAGATCGTGCTGCTGGGTGT	7	ACCCAGCAGCACGATCTCGTGTAA	2			ACCTCCACTATACGTCGTACGTTG	1	ACGTACGACGTATAGTGGAGGTAG	5
AAGTATATTGTTTTAACTGGGTTC	1	ACCCAGTTAAAACAATATACTTGA	1			ACGACCCGAAGAACCTTGACGTCG	1	ACGTCAAGGTTCTTCGGGTCGTAT	1
AATGGGTCAAAATTCATGGGTCA	2	ACCCATGAATTTTGACCCATTTT	1			AATTCTGAGTGAAACGTGACGTCT	2	ACGTCACGTTTCACTCAGAATTAC	1
AAGGGTAGAGTTGAAAATGGGTAT	29	ACCCATTTTCAACTCTACCCTTTT	1			AACTTTAAATAGGTAGGACGTGT	112	ACGTCCTACCTATTTAAAGTTTG	2
AATATCTAAGACCATATGGGGTAT	1	ACCCCATATGGTCTTAGATATTGA	3			AAACTTTAAATAGGTAGGACGTGT	42	ACGTCCTACCTATTTAAAGTTTGA	1
AAGGGCCCAAAAGTCCGGGGGTGA	1	ACCCCCGGACTTTTGGGCCCTTAA	2			ACCGGTTAGCGAAGGACGACGTAA	1	ACGTCGTCCTTCGCTAACCGGTAA	2
AAATATGCAGCACATCCGGGGTTC	1	ACCCCGGATGTGCTGCATATTTAG	1			ACCTTTCTCATGAGTCAGACGTTG	1	ACGTCTGACTCATGAGAAAGGTGA	3
AAGAGCTTGTATGAGACGGGGTAA	7	ACCCCGTCTCATACAAGCTCTTGC	8			AACTCATAAGATTGTGTCACGTGT	1	ACGTGACACAATCTTATGAGTTAG	4
AAAACAATTTCCAAATAGGGGTAA	1	ACCCCTATTTGGAAATTGTTTTAG	1			AATTCATAGGATCGTGTCACGTGT	2	ACGTGACACGATCCTATGAATTAG	1
AAAGGTAGAGTTGAAAAGGGGTAT	9	ACCCCTTTTCAACTCTACCTTTTT	1			AACTCATAGGATCGTGTCACGTGT	34	ACGTGACACGATCCTATGAGTTAT	4
AAGGAAGCATTGCGAATCGGGTGT	1	ACCCGATTCGCAATGCTTCCTTAA	1			AACTCATAGGATCGTGTCACGTGT	34	ACGTGACACGATCCTATGAGTTAA	1
AATTAGCGGTGTACTGCGGGTTT	1	ACCCGCAGTACACCGCTAATTTA	1			AACTCATAGGATCGTGTCACGTGT	34	ACGTGACACGATCCTATGAGTTAG	1
AATTTGTATGTAGATAGCGGGTCT	4	ACCCGCTATCTACATACAAATTTC	1			AACTCTTAAGATCGTGTCACGTGT	9	ACGTGACACGATCTTAAGAGTTAG	1
AAAGGTCACTTTCGATACGGGTAT	1	ACCCGTATCGAAAGTGACCTTTAA	1			ACCAATCAGAAGAAGTCACGTCA	1	ACGTGACTTCTTCTGATTGGTCA	1
AAAAACAAATCACAGGACGGGTAA	12	ACCCGTCCTGTGATTTGTTTTTTA	1			AACTCTTAAGATCGTGGCACGTGT	16	ACGTGCCACGATCTTAAGAGTTAG	1
AAATAAAACATGGTCAACGGGTGT	11	ACCCGTTGACCATGTTTTATTTTC	1			AACCACTCCAGCCCAAGCACGTTT	1	ACGTGCTTGGGCTGGAGTGGTTTC	1
AAATAAAACATGGTCAACGGGTGT	11	ACCCGTTGACCATGTTTTATTTCC	1			AACTCATAGGATTGTGCCACGTGT	16	ACGTGGCACAATCCTATGAGTTAG	1
ACATCTATTTGGGCTTTAGGGTAT	6	ACCCTAAAGCCCAAATAGATGTCT	1			AACTCAAAGGATTGTGCCACGTGT	1	ACGTGGCACAATCCTTTGAGTTAG	1
AAACGAGATTGATTTGGAGGGTTA	6	ACCCTCCAAATCAATCTCGTTTGC	1			AATTCATAAGATTGTGCCACGTGC	1	ACGTGGCACAATCTTATGAATTAG	1
AAGCGATATATGGTTAGAGGGTAA	2	ACCCTCTAACCATATATCGCTTTA	1			AACTCATAGGATCGTGCCACGTGT	34	ACGTGGCACGATCCTATGAGTTAG	1
AAACCTAATAAGTATCCAGGGTAT	3	ACCCTGGATACTTATTAGGTTTTT	1			AACTCATACGATCGTGCCACGTGT	1	ACGTGGCACGATCGTATGAGTTAG	17
AACATCATCTCTCTGTAAGGGTAA	4	ACCCTTACAGAGAGATGATGTTGC	1			AACTCTTAAGATCGTGCCACGTGT	9	ACGTGGCACGATCTTAAGAGTTAG	1
AAACAGATGCTGCAAGGGTTT	6	ACCCTTGCAGCATCTGTTTTG	4			ACCAACCGTATGCTGCCACGTCA	1	ACGTGGCAGCATACGGTTGGTTA	4
AAAACAGATGCTGCAAGGGTTT	6	ACCCTTGCAGCATCTGTTTTGA	16			AACCCCTCAACAGCCACGTAA	1	ACGTGGCTGTTGAGGGGTTGT	1
AACGATTTCAGGGTAAAAGGGTAA	1	ACCCTTTTACCCTGAAATCGTTGG	11			AACCAATCAGAAGAAGCCACGTCA	1	ACGTGGCTTCTTCTGATTGGTTAC	3
AACGATTTCAGGGTAAAAGGGTAA	1	ACCCTTTTACCCTGAAATCGTTTG	2			AACTCACAAGATCATGACACGTGT	2	ACGTGTCATGATCTTGTGAGTTAG	1
AAAATGGACGACATAAAAGGGTAT	2	ACCCTTTTATGTCGTCCATTTTTA	1			AAACCAACACATCGTCACACGTAC	12	ACGTGTGACGATGTGTTGGTTTAT	3
AAGGGTATTGTTGCAAAAGGGTAG	19	ACCCTTTTGCAACAATACCCTTTC	1			AAGTAGCCAGTCATTTTAACGTCA	1	ACGTTAAAATGACTGGCTACTTAT	3
AAGGGTATTGTTGCAAAAGGGTAC	2	ACCCTTTTGCAACAATACCCTTTC	1			ACCACGCAGTTGCCCAACGTAA	1	ACGTTGGGCAACTGCGTGGTAA	9
ACAAGAGATTTTAAAAAGGGTTT	1	ACCCTTTTTAAAATCTCTTGTAA	1			AAAATTCTGCGGGGGACAACGTAA	1	ACGTTGTCCCCCGCAGAATTTTGG	1
AAAAGAGTAGTAAAAAAAGGGTAG	2	ACCCTTTTTTTACTACTCTTTTGC	1			ACCAGCTAGCGGGGGACAACGTAA	1	ACGTTGTCCCCCGCTAGCTGGTAA	1
AAAGTCCACTTATCTTTTCGGTCA	1	ACCGAAAAGATAAGTGGACTTTGG	1			ACGGCATTACGGTAAACAACGTTA	39	ACGTTGTTTACCGTAATGCCGTCG	179
AAAGTCCACTTATCTTTTCGGTCA	1	ACCGAAAAGATAAGTGGACTTTGA	1			AAGATGGCAGCATAGTAAACGTTG	37	ACGTTTACTATGCTGCCATCTTGA	1
AAAGTACACTTATCTTTTCGGTTA	1	ACCGAAAAGATAAGTGTACTTTGG	1			AATGTGCAACTCTCTTTTTAGTTT	2	ACTAAAAAGAGAGTTGCACATTGA	1
AAGTAATATGATGTGTTTCGGTAC	1	ACCGAAACACATCATATTACTTAT	1			AATGTCTTCAGAGACTTTTAGTTG	1	ACTAAAAGTCTCTGAAGACATTGC	2
AACGATTATTCCCGGTTTCGGTCT	1	ACCGAAACCGGGAATAATCGTTGC	1			AAGCAAACGAACAACTTTTAGTCG	1	ACTAAAAGTTGTTCGTTTGCTTGT	2
AAGTGATATGATGCGGTTCGGTAC	6	ACCGAACCGCATCATATCACTTTT	2			AATTTAGGGTTTAGAGTTTAGTGT	1	ACTAAACTCTAAACCCTAAATTGT	1
AATTGGTGGAGAATCGTTCGGTAG	9	ACCGAACGATTCTCCACCAATTCA	1			AAACAAGGGCCTGGATTTAGTCA	2	ACTAAATCCAGGCCCTTGTTTTA	2
ACAGTATGGTAGTCCTTCGGTGA	2	ACCGAAGGACTACCATACTGTCT	4			AAAAGCTGAGAATGCATTTAGTTT	1	ACTAAATGCATTCTCAGCTTTTCC	2
AACTCTTTCGGCTGATTCGGTTA	8	ACCGAATCAGCCGAAAGAGTTTA	1			ACAACGTCATATTAATTTAGTAT	1	ACTAAATTAATATGACGTTGTGA	1
AAACTCTTTCGGCTGATTCGGTTA	13	ACCGAATCAGCCGAAAGAGTTTAT	1			AAGGACGAAAACAGCTGTTAGTTA	1	ACTAACAGCTGTTTTCGTCCTTAA	1
AAAGCCAGTCATTGTCGGTCA	4	ACCGACAATGACTGGCTTTAT	1			ACCGGACGGATAAACGGTTAGTAA	2	ACTAACCGTTTATCCGTCCGGTCC	1
AATTATCGGTTAACTGGTCGGTTC	87	ACCGACCAGTTAACCGATAATTAT	2			AATTAGATCTCCCGTCGTTAGTTA	1	ACTAACGACGGGAGATCTAATTGA	2
AAAAGCCCACCACACCGTCGGTTC	4	ACCGACGGTGTGGTGGGCTTTTAG	3			AAGACGGTTCGTAGTTAGTCC	1	ACTAACTACGAACCGTCTTTA	1
AATACGTGGATATAGTCGGTTA	2	ACCGACTATATCCACGTATTAA	1			AAAGATGGTCTGCAGTTAGTAC	25	ACTAACTGCAGACCATCTTTAA	1
ACAATATATTTTTACAGTCGGTTC	2	ACCGACTGTAAAAATATATTGTCC	1			AAAGACCGTCTGCAGTTAGTCC	1	ACTAACTGCAGACGGTCTTTAA	1
AAAAGCCTTATAGACAGTCGGTCA	1	ACCGACTGTCTATAAGGCTTTTTA	1			AAGACGGTCCGCAGTTAGTCC	1	ACTAACTGCGGACCGTCTTTA	1
AATCTCTCTGGTTTAAGTCGGTAT	8	ACCGACTTAAACCAGAGAGATTGT	2			ACCAAGGACATCACAAGTTAGTAG	1	ACTAACTTGTGATGTCCTTGGTTC	1
ACCAAAGATCACCACTCTCGGTGG	1	ACCGAGAGTGGTGATCTTTGGTTC	3			ACAGGTGAGAAATCTGCTTAGTGG	17	ACTAAGCAGATTTCTCACCTGTGC	3
AATCGGCCTGACTATCACTCGGTAT	1	ACCGAGTGATAGTCAGGCCGATTGC	1			AACCACAGCATGTAATATTAGTTT	2	ACTAATATTACATGCTGTGGTTTC	4
AAGAAGAGAAAATTTATCGGTTT	1	ACCGATAAATTTTCTCTTCTTTA	1			AACGTCCAAATAAAAATTAGTTA	1	ACTAATTTTTATTTGGACGTTTA	3
AACCTCTTATCCAAAGATCGGTAT	1	ACCGATCTTTGGATAAGAGGTTAT	1			AAACGTCCAAATAAAAATTAGTTG	1	ACTAATTTTTATTTGGACGTTTAA	3
AATCGCATCGATCATCGGTAA	1	ACCGATGATCGATGCGATTTT	1			AAATAGGTAGAAACTTTGTAGTGT	2	ACTACAAAGTTTCTACCTATTTAT	3
AAGTAAGACCATCTCCATCGGTGG	1	ACCGATGGAGATGGTCTTACTTGC	1			AACTGGCGTGTTTTCTTGTAGTGA	1	ACTACAAGAAAACACGCCAGTTGC	1
AATGGTGATTGCGTTTTGCGGTGC	1	ACCGCAAAACGCAATCACCATTCG	2			AAGAGATCCATATTTATGTAGTTA	4	ACTACATAAATATGGATCTCTTGT	1
AATGGTGACTGCGTTTTGCGGTGT	1	ACCGCAAAACGCAGTCACCATTCG	1			AAAGTGAAAGCCCGCACGTAGTGC	1	ACTACGTGCGGGCTTTCACTTTAT	1
AATGGTGACTGCGTTTTGCGGTGT	1	ACCGCAAAACGCAGTCACCATTCA	1			AAACTTAATTAGGAAAGTAGTCA	1	ACTACTTTCCTAATTAAGTTTGA	1
AAAATATAAGCCTACTTGCGGTAT	1	ACCGCAAGTAGGCTTATATTTTAG	13			AATAGGCGGGCCTTATCTAGTTA	2	ACTAGATAAGGCCCGCCTATTTA	3
ACAGTACTGTTGCGGTGCGGTTT	3	ACCGCACCGCAACAGTACTGTAA	2			AACCACGTCAGATGATACTAGTAT	2	ACTAGTATCATCTGACGTGGTTTT	1
AAATATAAGTCTACCTGCGGTAT	3	ACCGCAGGTAGACTTATATTTTA	7			ACGATCTCTGAATCTATATAGTAT	1	ACTATATAGATTCAGAGATCGTAA	1
AAAATATAAGTCTACCTGCGGTAT	1	ACCGCAGGTAGACTTATATTTTAG	13			AAAAAAAAAAATAGATAGTCT	1	ACTATCTATTTTTTTTTTTAT	2
AAAGTATAAGCCTACCTGCGGTAT	2	ACCGCAGGTAGGCTTATACTTTAG	4			AAATCGCATAACCCGGCATAGTAG	2	ACTATGCCGGGTTATGCGATTTAG	2
AAAATATAAGCCTACCTGCGGTAT	29	ACCGCAGGTAGGCTTATATTTTAG	38			AATCTCAAGATGGCAGCATAGTAA	21	ACTATGCTGCCATCTTGAGATTGT	11
AAAATATAAGCCTACCTGCGGTAT	29	ACCGCAGGTAGGCTTATATTTTAC	1			ACCAGGTCCAGACATAGTAA	13	ACTATGTCTGGACCTGGTAA	1
AACGAACAAATAAACCTGCGGTTG	1	ACCGCAGGTTTATTTGTTCGTTTT	1			AAAGGTAAAGAAAAGACATAGTTC	6	ACTATGTCTTTTCTTTACCTTTAG	1
AAAATTGAAACAATCATGCGGTAG	1	ACCGCATGATTGTTTCAATTTTAA	1			ACGCCAACTTTTAAAACATAGTCA	1	ACTATGTTTTAAAAGTTGGCGTAT	1
AAAAGTAAATTGTCTTCGCGGTAT	1	ACCGCGAAGACAATTTACTTTTTT	1			AAGAAATTTAACGCCGTTGAGTCG	1	ACTCAACGGCGTTAAATTTCTTGC	3
ACAAAATAAATCGTTCCGCGGTAT	4	ACCGCGGAACGATTTATTTTGTAA	1			AAGTAGACGATAAGCTTGAGTTC	2	ACTCAAGCTTATCGTCTACTTTT	1
AATAAAAATATAGGTCCGCGGTAT	3	ACCGCGGACCTATATTTTTATTAA	2			AAAGTAGACGATAAGCTTGAGTTC	2	ACTCAAGCTTATCGTCTACTTTTC	4
AAAAATCATTTGTCTCCGCGGTGT	1	ACCGCGGAGACAAATGATTTTTTA	2			AATGTACAAACTAACCTTGAGTCA	1	ACTCAAGGTTAGTTTGTACATTCT	1
AAAATGAATTGTCTCCGCGGTGT	1	ACCGCGGAGACAATTCATTTTTA	3			ACGACGGAGGGTTCGATTGAGTTT	1	ACTCAATCGAACCCTCCGTCGTGG	1
AAAATGAATTGTCTCCGCGGTGT	1	ACCGCGGAGACAATTCATTTTTT	3			AATGACAACGATACTTGTGAGTGG	1	ACTCACAAGTATCGTTGTCATTTA	3
AAAAATGAATTGTCTCCGCGGTGT	8	ACCGCGGAGACAATTCATTTTTAA	1			AAGAAGATAGGAACTGCTGAGTGA	1	ACTCAGCAGTTCCTATCTTCTTTT	1
AAAAATGAATTGTCTCCGCGGTAT	3	ACCGCGGAGACAATTCATTTTTAA	1			AAGAAGATAGGAACTGCTGAGTAA	1	ACTCAGCAGTTCCTATCTTCTTTT	1
AAAAATGAATTGTCTCCGCGGTAC	1	ACCGCGGAGACAATTCATTTTTAA	1			ACGTGACACGATCCTATGAGTTA	7	ACTCATAGGATCGTGTCACGTGT	1
AAAAACAATTGTCTCCGCGGTAT	1	ACCGCGGAGACAATTGTTTTTTA	1			ACCAAGTCCATCCAAATGAGTTT	1	ACTCATTTGGATGGACTTGGTTG	1
AAAGATAAATTGTCTCCGCGGTGT	1	ACCGCGGAGACAATTTATCTTTTT	1			AATGCCGTCGAAAATGAGTAT	1	ACTCATTTTCGACGGCATTAC	24
AAAATGAACTGTCTCCGCGGTGT	1	ACCGCGGAGACAGTTCATTTTTA	8			ACGGTCTAAAAGTTATGGAGTCA	55	ACTCCATAACTTTTAGACCGTGA	2
AAAAATGAACTGTCTCCGCGGTGT	11	ACCGCGGAGACAGTTCATTTTTAA	1			AAAAATTTGTCTTCGTCGGAGTCG	1	ACTCCGACGAAGACAAATTTTTTA	1
AATGTAAACTTTACTCCGCGGTAC	4	ACCGCGGAGTAAAGTTTACATTAT	1			AATGCATCGACGACACCGGAGTAA	14	ACTCCGGTGTCGTCGATGCATTGC	1
AAAAATAAATCGTCCCGCGGTAT	13	ACCGCGGGACGATTTATTTTTTA	5			AATTTGCGATAGAATTAGGAGTGA	6	ACTCCTAATTCTATCGCAAATTAT	1
AAAAAATAAATCGTCCCGCGGTAT	75	ACCGCGGGACGATTTATTTTTTAA	1			AATTTGCGATAGAATTAGGAGTGG	1	ACTCCTAATTCTATCGCAAATTAT	1
AAATAAACCGATTGCCCGCGGTAA	1	ACCGCGGGCAATCGGTTTATTTGG	13			ACAATACCGGGCTCTTTCGAGTCT	1	ACTCGAAAGAGCCCGGTATTGTTA	1
AAATAAACCGATTGCCCGCGGTAA	1	ACCGCGGGCAATCGGTTTATTTAG	4			ACCTCTAATTCGTTCGAGTCA	1	ACTCGAACGAATTAGAGGTAG	14
AATGAAAATATAGGCCCGCGGTAT	5	ACCGCGGGCCTATATTTTCATTAA	1			ACCGGTTCACTGGGTCGCGAGTTA	2	ACTCGCGACCCAGTGAACCGGTTG	5
ACAGATCGTAGGTACTTCCGGTAT	5	ACCGGAAGTACCTACGATCTGTAT	3			ACCACACTGCCTGGTCCGAGTTT	1	ACTCGGACCAGGCAGTGTGGTGG	1
AATTGTATCGCACTGTCCGGTTC	1	ACCGGACAGTGCGATACAATTCA	5			ACGGTCTAAAAGTTCTAGAGTCA	1	ACTCTAGAACTTTTAGACCGTGA	5
AAAACATGTGAAAGTCTCCGGTCA	2	ACCGGAGACTTTCACATGTTTTGG	2			AAAGCTCGAACCCTTGGAGAGTGT	16	ACTCTCCAAGGGTTCGAGCTTTCC	2
AACTGAACTTCGACGCTCCGGTAC	6	ACCGGAGCGTCGAAGTTCAGTTGG	5			ACCATATTCCTGAAACCAGAGTGT	2	ACTCTGGTTTCAGGAATATGGTAG	4
AAAGGATCTGGTCAGCTCCGGTAG	16	ACCGGAGCTGACCAGATCCTTTAA	1			ACTAGAGACGATTGATAAGAGTAA	2	ACTCTTATCAATCGTCTCTAGTAA	1
AAATCTCATCGACTGATCCGGTAT	11	ACCGGATCAGTCGATGAGATTTAT	1			AATCAACGATTTCAAAAGAGTTA	1	ACTCTTTTGAAATCGTTGATTAT	1
AATTTTAATTTTATTTGCCGGTGG	1	ACCGGCAAATAAAATTAAAATTAA	1			AAAGTGCACATATCTTTTCAGTTA	4	ACTGAAAAGATATGTGCACTTTGA	11
AAGAGAAGATTGGATTGCCGGTAA	9	ACCGGCAATCCAATCTTCTCTTTG	1			AAAATATCGGTTCGGTTTCAGTTC	1	ACTGAAACCGAACCGATATTTTAG	1
AATTGAAAAAGTCCTCGCCGGTGA	2	ACCGGCGAGGACTTTTTCAATTAT	1			AATCACGGCGTTAACTTTCAGTTA	3	ACTGAAAGTTAACGCCGTGATTGT	26
AAAACGATTATCCTCCCGGTAA	2	ACCGGGAGGATAATCGTTTTGC	4			AATTTTCGTGTTGGTTCAGTTG	4	ACTGAACCAACACGAAAATTCC	2
AATAAAGAAGTGGGACCCGGTGC	5	ACCGGGTCCCACTTCTTTATTCA	1			AAAACAGTCTTGAGAATTCAGTAT	1	ACTGAATTCTCAAGACTGTTTTAC	3
AAATGTCTGAGGAGACACCGGTGC	56	ACCGGTGTCTCCTCAGACATTTCA	1			ACAGAGAATCGAGTATGTCAGTAT	1	ACTGACATACTCGATTCTCTGTTG	1
AATCCTCCGCCTAACACCGGTTA	1	ACCGGTGTTAGGCGGAGGATTTT	1			AACAGTAGGTGCCTCAGTCAGTAA	1	ACTGACTGAGGCACCTACTGTTAT	1
AATCATATCCTGTTGAACCGGTTG	19	ACCGGTTCAACAGGATATGATTAT	2			ACGGGTCAGCTGAGTCATCAGTAG	2	ACTGATGACTCAGCTGACCCGTGA	1
AAGTGTCGTTATATCAACCGGTAA	2	ACCGGTTGATATAACGACACTTGG	1			ACATCCGGTCAGCATCATCAGTAC	110	ACTGATGATGCTGACCGGATGTCA	99
AATTTGTCATTGTCTTTACGGTCT	1	ACCGTAAAGACAATGACAAATTCT	1			AAATATCGTCAATCCCATCAGTAC	1	ACTGATGGGATTGACGATATTTAG	47
AACCGGAAGCCGGGTTACGGTGC	6	ACCGTAACCCGGCTTCCGGTTCA	1			ACACTTGTCTCCATTAATCAGTAA	1	ACTGATTAATGGAGACAAGTGTGC	3
AAGAACACATCACCGATACGGTTA	46	ACCGTATCGGTGATGTGTTCTTAA	4			ACCCATTTCTTGTGCCGGCAGTTA	1	ACTGCCGGCACAAGAAATGGGTTT	9
ACCATTTCAAGAGTTCACGGTTA	6	ACCGTGAACTCTTGAAATGGTCG	1			ACTAGGTAACTTCTCTCGCAGTAT	1	ACTGCGAGAGAAGTTACCTAGTTT	1
AACGGTTCACCGGGTCACGGTTG	1	ACCGTGACCCGGTGAACCGTTTG	4			AAAACATATACAACTCGCAGTTT	4	ACTGCGAGTTGTATATGTTTTGT	1
AAATATAAATTGTCTCCACGGTGT	2	ACCGTGGAGACAATTTATATTTTA	1			AAAGATAAATTGTCCCCGCAGTGT	1	ACTGCGGGGACAATTTATCTTTTT	1
AACGACGGATCGACGGAACGGTGG	2	ACCGTTCCGTCGATCCGTCGTTCC	1			AATACCAGTTACCACGCAGTTG	6	ACTGCGTGGTAACTGGTATTCA	18
AAAGTACTGCTCGTTAGGTTC	1	ACCTAACGAGCAGTACTTTGT	1			AAACGCAGCGTCAAACGCAGTTT	1	ACTGCGTTTGACGCTGCGTTTTG	1
AAAACCGACTCTGAGATTAGGTAT	7	ACCTAATCTCAGAGTCGGTTTTTG	2			ACAGGATGCAGTAAACAGCAGTAG	3	ACTGCTGTTTACTGCATCCTGTCA	1
AAAGACACCATCTTCATTAGGTCT	1	ACCTAATGAAGATGGTGTCTTTCC	3			AATCAGCAGTCACTTTTCCAGTAA	1	ACTGGAAAAGTGACTGCTGATTTA	1
AAAGACGGCCGCAAAATTAGGTTT	2	ACCTAATTTTGCGGCCGTCTTTAG	1			AAGAAGATCAGGTGATCCAGTTA	1	ACTGGATCACCTGATCTTCTTTA	1
AAAGACGGCCGCAAAATTAGGTTT	2	ACCTAATTTTGCGGCCGTCTTTAT	1			AAACCCTATCCGCTGATCCAGTCA	11	ACTGGATCAGCGGATAGGGTTTAT	37
AAAGACGGCCGCAAAATTAGGTTT	2	ACCTAATTTTGCGGCCGTCTTTAC	1			ACGGTCCATGGGCTTGCCCAGTCC	2	ACTGGGCAAGCCCATGGACCGTCT	28
ACCCCAGTCCAATTGTGTAGGTTA	1	ACCTACACAATTGGACTGGGGTTT	5			AACCAGAGAGTTCGAACCCAGTTA	1	ACTGGGTTCGAACTCTCTGGTTGT	2
AACTCCAGTAGGGTGGGTAGGTGG	2	ACCTACCCACCCTACTGGAGTTCG	1			AAACCGCTCACAGAATACCAGTTA	1	ACTGGTATTCTGTGAGCGGTTTAA	2
AAAAATAATTTGTAAAGTAGGTAA	3	ACCTACTTTACAAATTATTTTTGA	2			ACCCGTGACCCGATGAACCAGTTG	1	ACTGGTTCATCGGGTCACGGGTTA	7
AAAAATAATTTGTAAAGTAGGTAG	1	ACCTACTTTACAAATTATTTTTGA	2			ACGACCAATCAGAACCAGTTT	3	ACTGGTTCTGATTGGTCGTCT	1
AAACGGAGCCGGAAACTGAGGTAA	2	ACCTCAGTTTCCGGCTCCGTTTCT	1			AAGTGGTCTATATCTGTACAGTGC	2	ACTGTACAGATATAGACCACTTTA	3
AATCCTGACACGGGGAGGTAG	3	ACCTCCCCGTGTCAGGATTGG	1			AAAACCACCCGCCGTCTACAGTAC	1	ACTGTAGACGGCGGGTGGTTTTCA	10
AAAAACGTACCGTTGAGAGGTTG	1	ACCTCTCAACGGTACGTTTTTAT	3			AACGAACAACACTTTGACAGTTA	3	ACTGTCAAAGTGTTGTTCGTTTG	1
AAGATTGTGCCACGTGTCAGGTCA	2	ACCTGACACGTGGCACAATCTTAT	8			AAACGAACAACACTTTGACAGTTA	1	ACTGTCAAAGTGTTGTTCGTTTGA	2
ACCAAAAATTATAATCGCAGGTCG	1	ACCTGCGATTATAATTTTTGGTCG	1			ACAGCCACCTATACACACAGTTT	1	ACTGTGTGTATAGGTGGCTGTTT	2
AAAAACACCATATTCACCAGGTCT	1	ACCTGGTGAATATGGTGTTTTTCC	1			ACGTGTAAGCCGGTGAAACAGTAG	23	ACTGTTTCACCGGCTTACACGTGT	4
AAAGGCGGTACCTACACCAGGTTA	1	ACCTGGTGTAGGTACCGCCTTTGG	1			AAGATCCGGTTGCGGTTTAAGTTC	2	ACTTAAACCGCAACCGGATCTTAA	1
AACCGGCGGTTTTTCTACAGGTGG	1	ACCTGTAGAAAAACCGCCGGTTGC	3			AAGATCCGGTTGCGGTTTAAGTTC	2	ACTTAAACCGCAACCGGATCTTAT	1
ACAGCGACGGGATTGAAGGTCG	8	ACCTTCAATCCCGTCGCTGTCA	1			AAGATCCGGTTGCGGTTTAAGTCT	1	ACTTAAACCGCAACCGGATCTTAA	1
AACATAAAGGTACAAGAAGGTAA	1	ACCTTCTTGTACCTTTATGTTTA	1			AAGATCCGGTTGCGGTTTAAGTCT	1	ACTTAAACCGCAACCGGATCTTAT	1
ACCGCATCAGGTCTCCAAGGTGA	4	ACCTTGGAGACCTGATGCGGTTA	2			AAGTAAATAGTACCGTGTAAGTCA	2	ACTTACACGGTACTATTTACTTAA	2
ACCTAATCAACGGATCCAAGGTAC	1	ACCTTGGATCCGTTGATTAGGTCA	1			ACTATGTCTGGACCTGGTAAGTTT	3	ACTTACCAGGTCCAGACATAGTAA	2
AACTGTTGATCTCGACAAAGGTAA	4	ACCTTTGTCGAGATCAACAGTTAA	1			ACCCATCTTCGCCGTCGTAAGTAG	1	ACTTACGACGGCGAAGATGGGTTT	3
AACATCCAAACCCCTAAAAGGTGT	1	ACCTTTTAGGGGTTTGGATGTTGT	8			ACACATCATCACACCAGTAAGTGC	1	ACTTACTGGTGTGATGATGTGTCA	1
AACCAGAACCAGAATAAAAGGTAG	5	ACCTTTTATTCTGGTTCTGGTTCT	1			ACCTGTACTTTCGGTTCTAAGTTT	2	ACTTAGAACCGAAAGTACAGGTTG	1
AAAAAGGTAGTAGAAAAAGGTAC	1	ACCTTTTTCTACTACCTTTTTGC	1			AAAAATAGATAGTCTAAGTCA	2	ACTTAGACTATCTATTTTTTT	1
AAAAGTTCATGTTTTTTTCGTCA	1	ACGAAAAAAACATGAACTTTTCA	1			AAGTCTGACCTGTTCCCTAAGTTT	2	ACTTAGGGAACAGGTCAGACTTAC	3
AATCACGGTGTTAACTTTTCGTTA	2	ACGAAAAGTTAACACCGTGATTGT	2			AAGGTTAATGGTTTATATAAGTGA	9	ACTTATATAAACCATTAACCTTAA	2
ACCGGTGACCTCTATGTTTCGTCT	1	ACGAAACATAGAGGTCACCGGTTC	1			AAGTGTCTAATGATTGTGAAGTGC	1	ACTTCACAATCATTAGACACTTTT	2
ACCAAGCAAACCCATCTTTCGTGC	1	ACGAAAGATGGGTTTGCTTGGTGA	1			ACCAAAGCCGACAGATGAAGTTA	1	ACTTCATCTGTCGGCTTTGGTTT	1
AACGGTATTTCGACGATTTCGTCC	3	ACGAAATCGTCGAAATACCGTTAA	1			ACCTCTTTTCGCCGGACGAAGTTG	1	ACTTCGTCCGGCGAAAAGAGGTAG	7
AAGTGACTCAACTCCATTTCGTTT	1	ACGAAATGGAGTTGAGTCACTTAG	1			AATCTCTTTATATAGTAGAAGTAG	1	ACTTCTACTATATAAAGAGATTCA	1
AAAGTTTTGTTTGTAATTTCGTGG	2	ACGAAATTACAAACAAAACTTTGA	1			ACCAGTTGCGGCCCAGAGAAGTTC	6	ACTTCTCTGGGCCGCAACTGGTAT	7
AACCGCAGGTTTATTTGTTCGTTT	1	ACGAACAAATAAACCTGCGGTTGC	36			AAAGAGTGATGGTTCAAGTTC	3	ACTTGAACCATCACTCTTTCT	1
AACAATACCCTTTCTTGTTCGTTA	3	ACGAACAAGAAAGGGTATTGTTGC	5			AAGATTGTGTCACGTGTCAAGTCA	7	ACTTGACACGTGACACAATCTTAT	1
AAGTATCGCCTCTGTTCGTTG	1	ACGAACAGAGGCGATACTTGA	1			AAGATTGTGGCACGTGTCAAGTCT	1	ACTTGACACGTGCCACAATCTTAT	1
ACAATTCCTAAACAATGTTCGTCT	1	ACGAACATTGTTTAGGAATTGTGT	1			AAGATCGTGCCACGTGTCAAGTCA	2	ACTTGACACGTGGCACGATCTTAA	2
AAGATCATCTCCAATGGTTCGTAA	1	ACGAACCATTGGAGATGATCTTAA	2			ACCGCAACAGAGACTCTCAAGTTA	1	ACTTGAGAGTCTCTGTTGCGGTGG	8
AATTACTGTCTTTCCGTTCGTCA	2	ACGAACGGAAAGACAGTAATTAA	1			ACCGCAACAGAGACTCTCAAGTTA	1	ACTTGAGAGTCTCTGTTGCGGTGA	1
AATGTCTTTTCTAGTTCGTCG	8	ACGAACTAGAAAAGACATTGG	3			AACGACTAAATAACCCTCAAGTTA	3	ACTTGAGGGTTATTTAGTCGTTGT	2
AATTATCTGGTTTCTTCTTCGTAA	1	ACGAAGAAGAAACCAGATAATTGA	2			AAAGCAAATCACAAAATCAAGTAT	1	ACTTGATTTTGTGATTTGCTTTGC	5
AATGGGTGTTGCCAATCTTCGTGT	27	ACGAAGATTGGCAACACCCATTGC	2			AATAAACCGCTGCGGACCAAGTTT	2	ACTTGGTCCGCAGCGGTTTATTGT	7
ACACAAAAATCCGGATATTCGTAT	1	ACGAATATCCGGATTTTTGTGTGA	1			AATAAACCGCTGCAGACCAAGTTT	1	ACTTGGTCTGCAGCGGTTTATTGT	57
AAATAAAAATAGTCTGATTCGTTG	1	ACGAATCAGACTATTTTTATTTAC	1			AACGATCAGATGTTTACAAGTTA	1	ACTTGTAAACATCTGATCGTTTG	5
AAAGGTAGAATCGTGTTGTCGTGT	2	ACGACAACACGATTCTACCTTTAA	1			AAACGATCAGATGTTTACAAGTTA	1	ACTTGTAAACATCTGATCGTTTGA	24
AAATACATATCTTAAGTGTCGTCT	11	ACGACACTTAAGATATGTATTTAT	34			AAGTGCTTCATCCGTGACAAGTGC	1	ACTTGTCACGGATGAAGCACTTTT	1
AATCTTCTCAAAGATCTGTCGTTT	2	ACGACAGATCTTTGAGAAGATTGA	1			AAGTGCCTCATCCCTGACAAGTGC	1	ACTTGTCAGGGATGAGGCACTTTT	213
AAATTGTTCGTTTGCATGTCGTTG	2	ACGACATGCAAACGAACAATTTAG	2			AACAACAACGACACACACAAGTAA	4	ACTTGTGTGTGTCGTTGTTGTTGC	1
AATAAAAATGTTGACCGGTCGTTT	3	ACGACCGGTCAACATTTTTATTAT	2			AAATGCTCACTACCTCTAAAGTAC	1	ACTTTAGAGGTAGTGAGCATTTAT	1
AACCGAAAAGTCGCATCGTCGTTT	2	ACGACGATGCGACTTTTCGGTTTT	1			ACGCCAGATAGAACCTAAAGTAT	1	ACTTTAGGTTCTATCTGGCGTGA	1
ACCGGAAAATCGTCTGCGTCGTCG	1	ACGACGCAGACGATTTTCCGGTGA	2			AAGCGCCTCATCCCTATAAAGTGT	1	ACTTTATAGGGATGAGGCGCTTTT	4
AATAAAGTGGGATAGGCGTCGTCT	3	ACGACGCCTATCCCACTTTATTGA	3			AAGAAGAAGTCCACTATAAAGTAT	2	ACTTTATAGTGGACTTCTTCTTAA	2
ACCTACCTCCACTATACGTCGTAC	13	ACGACGTATAGTGGAGGTAGGTGA	13			AAGAAACTAGCAGAGATAAAGTTT	1	ACTTTATCTCTGCTAGTTTCTTAA	1
ACCTACCTCCACCATACGTCGTAC	1	ACGACGTATGGTGGAGGTAGGTGA	8			AATTTAGCCACTTTTTGAAAGTTC	1	ACTTTCAAAAAGTGGCTAAATTAA	1
AATCTGTCCAAAACAACGTCGTTT	1	ACGACGTTGTTTTGGACAGATTAA	3			AAGTGCCTGAACCTTGGAAAGTGC	3	ACTTTCCAAGGTTCAGGCACTTTT	1
AAATTCAGTGGCATTGAGTCGTAA	1	ACGACTCAATGCCACTGAATTTAT	1			AAGGAGAGAGTGTATAGAAAGTTT	3	ACTTTCTATACACTCTCTCCTTTA	1
AATGAGATTTTCAAGTCGTCT	5	ACGACTTGAAAATCTCATTTA	7			AAGTGTCTGAACAATAGAAAGTGC	3	ACTTTCTATTGTTCAGACACTTTT	1
AAAGGCCAATAAGTTCTCTCGTCA	10	ACGAGAGAACTTATTGGCCTTTTG	11			AAGTGCCTTCTCCTTTCAAAGTGC	1	ACTTTGAAAGGAGAAGGCACTTTA	3
AATTTAATCTATAAGTTATCGTTG	2	ACGATAACTTATAGATTAAATTAG	1			AATACAATCTTCTCTTCAAAGTTA	1	ACTTTGAAGAGAAGATTGTATTGG	29
AACAATCGACAGAACTTATCGTTA	1	ACGATAAGTTCTGTCGATTGTTGC	2			AAGTGCCTACTCCCTCCAAAGTGC	2	ACTTTGGAGGGAGTAGGCACTTTT	15
ACCTTCAATCCTCTATTATCGTCT	1	ACGATAATAGAGGATTGAAGGTAA	2			ACTTCCCCATGTGATCCAAAGTTC	1	ACTTTGGATCACATGGGGAAGTAG	5
AAAGAGCCAACTTGTATCGTCT	1	ACGATACAAGTTGGCTCTTTCC	1			AAGGCTCTTCTTACCCCAAAGTCT	2	ACTTTGGGGTAAGAAGAGCCTTGG	2
AAAGTTCATACCGCTCTATCGTCG	4	ACGATAGAGCGGTATGAACTTTAA	2			ACAAACTGGTAAACAAAGTGA	92	ACTTTGTTTACCAGTTTGTTC	1
ACACATGTAAACATCTGATCGTTT	6	ACGATCAGATGTTTACATGTGTCA	3			AACAAACTGGTAAACAAAGTGA	52	ACTTTGTTTACCAGTTTGTTCT	1
AACGATATTTATATCCGATCGTAA	1	ACGATCGGATATAAATATCGTTGG	1			AAGTCGGCAGACAACTAAAAGTCC	3	ACTTTTAGTTGTCTGCCGACTTGA	2
ACCGAAATAACCGACGATCGTTA	2	ACGATCGTCGGTTATTTCGGTTA	2			AAGTCGGCAGACAACTAAAAGTCC	3	ACTTTTAGTTGTCTGCCGACTTAG	1
AAATTTTCTAAAATTCCATCGTCT	1	ACGATGGAATTTTAGAAAATTTAT	1			AAGTCGGCAGACAACTAAAAGTCT	1	ACTTTTAGTTGTCTGCCGACTTGA	2
AAGTATAAGCCAACACATCGTCA	4	ACGATGTGTTGGCTTATACTTCA	3			AAGTCGGCAGACAACTAAAAGTCT	1	ACTTTTAGTTGTCTGCCGACTTAG	1
AACTCGCAGGTAAGAGAATCGTTT	4	ACGATTCTCTTACCTGCGAGTTAT	4			ACGGCTAAACTTTCAGAAAAGTGC	46	ACTTTTCTGAAAGTTTAGCCGTAA	1
AATAGAGAAAAGTCAGAATCGTCC	1	ACGATTCTGACTTTTCTCTATTCT	1			AAAGGCCGGTCTCATCAAAAGTAC	7	ACTTTTGATGAGACCGGCCTTTGT	1
AAGAGGGTGCGTTGTCAATCGTTT	4	ACGATTGACAACGCACCCTCTTAT	3			ACCAGCGACAGCGACCAAAAGTTG	1	ACTTTTGGTCGCTGTCGCTGGTTT	1
AATGCTATAATAGAGAAATCGTAG	1	ACGATTTCTCTATTATAGCATTAA	7			AAATTTGGAGTCGACAAAAAGTCA	2	ACTTTTTGTCGACTCCAAATTTTG	1
ACAAAGGCAACTACAAAATCGTGG	1	ACGATTTTGTAGTTGCCTTTGTGA	1			AATTGGATTCTCAGTTTTTTCTTC	1	AGAAAAAACTGAGAATCCAATTAG	3
AATGGACCCATGACATTTGCGTAA	5	ACGCAAATGTCATGGGTCCATTAC	3			AAGTGTTCTGCAACGTTTTTCTGA	1	AGAAAAACGTTGCAGAACACTTGC	1
AAGAACTTCTCTGACTTGCGTCC	1	ACGCAAGTCAGAGAAGTTCTTGA	1			ACAACCAAGATGTAGTTTTTCTTA	1	AGAAAAACTACATCTTGGTTGTCG	4
AAATTCCGATAATAGATGCGTCT	1	ACGCATCTATTATCGGAATTTAC	1			AAGTGAAATGTTCTCTTTTTCTAA	1	AGAAAAAGAGAACATTTCACTTGG	1
AATAGGCTTTTCCGAGATGCGTGT	2	ACGCATCTCGGAAAAGCCTATTAA	3			ACACTATGTTTGATTGTTTTCTAA	2	AGAAAACAATCAAACATAGTGTAG	3
AATCAGTCTGCCTATAATGCGTAA	1	ACGCATTATAGGCAGACTGATTAT	12			AAAATGGGTATAAGTGTTTTCTAA	1	AGAAAACACTTATACCCATTTTCA	9
AACCAAACAATCACGGCGTTA	3	ACGCCGTGATTGTTTGGTTGA	1			AAATGGTCCGCTGCGGTTTTCTTC	2	AGAAAACCGCAGCGGACCATTTGC	4
AAAACAGATATATCAGAGGCGTAA	1	ACGCCTCTGATATATCTGTTTTGA	1			ACTCCAGCTTTGATCGTTTTCTTC	1	AGAAAACGATCAAAGCTGGAGTAG	1
AACTGGATCTTAAAGGCGTAA	1	ACGCCTTTAAGATCCAGTTGC	1			AAAGGTGATTGTCCGTTTTCTCA	1	AGAAAACGGACAATCACCTTTCT	1
ACCGGATCTTAAAGGCGTAA	1	ACGCCTTTAAGATCCGGTTG	1			AAGTCAAATGTGTCTCTTTTCTAA	1	AGAAAAGAGACACATTTGACTTGA	8
AACCGGATCTTAAAGGCGTAA	12	ACGCCTTTAAGATCCGGTTGC	7			ACTGCGGGACGATTTATTTTCTAA	1	AGAAAATAAATCGTCCCGCAGTAT	5
AACCGGATCTTAAAGGCGTAA	12	ACGCCTTTAAGATCCGGTTGT	1			ACCGCAGGACGATTTATTTTCTAA	1	AGAAAATAAATCGTCCTGCGGTAT	12
AAAACAAACCTACGCGTAGCGTGG	1	ACGCTACGCGTAGGTTTGTTTTGA	1			ACAACACTTATACCCATTTTCTCC	1	AGAAAATGGGTATAAGTGTTGTCT	3
AAGTTCTTGGTTCAGTGAGCGTGG	3	ACGCTCACTGAACCAAGAACTTAA	2			AATGCAGACCTCTGTTGTTTCTTC	2	AGAAACAACAGAGGTCTGCATTCC	35
AAGTTGTCTTGATCTTCAGCGTTT	1	ACGCTGAAGATCAAGACAACTTTG	1			AAGGATTTGTTATTGGGTTTCTTT	3	AGAAACCCAATAACAAATCCTTGC	1
AAAGCTCCTTCCCGCAAGCGTTT	1	ACGCTTGCGGGAAGGAGCTTTTA	6			AACAAAAGCAAAATGGGTTTCTCT	1	AGAAACCCATTTTGCTTTTGTTTT	1
AAAAGCTCCTTCCCGCAAGCGTTT	9	ACGCTTGCGGGAAGGAGCTTTTAA	1			AAAGCGGTATCTAGCGGTTTCTAT	10	AGAAACCGCTAGATACCGCTTTGG	3
AAAGGTATGCATTGGAAAGCGTGG	2	ACGCTTTCCAATGCATACCTTTCG	2			AAAACGGTATCTAGCGGTTTCTAT	2	AGAAACCGCTAGATACCGTTTTGG	1
AACCGCACCGTACTTTTTCCGTAC	1	ACGGAAAAAGTACGGTGCGGTTTA	15			AAAGCGGTATCGAGCGGTTTCTAT	2	AGAAACCGCTCGATACCGCTTTGG	1
AAGCATGTCGTTAAGTTTCCGTTA	2	ACGGAAACTTAACGACATGCTTAA	62			ACGGATCAGTAGAAAGGTTTCTGA	2	AGAAACCTTTCTACTGATCCGTAT	2
AATGTCATATCCAGTGTTCCGTCT	4	ACGGAACACTGGATATGACATTTA	1			ACTTCAGTCATACGCGTTTCTTA	3	AGAAACGCGTATGACTGAAGTCT	4
ACAGAACTTATCGTTATTCCGTGT	1	ACGGAATAACGATAAGTTCTGTCG	3			AATGGAAATGGCCTTAGTTTCTTA	2	AGAAACTAAGGCCATTTCCATTAG	1
AATAACTAAGTTATCATTCCGTCA	1	ACGGAATGATAACTTAGTTATTTT	2			ACCCCGCTAGTTTCTAGTTTCTGG	1	AGAAACTAGAAACTAGCGGGGTGT	1
AATCTGCATAGTATTTGTCCGTCT	1	ACGGACAAATACTATGCAGATTAA	26			ACAGATACAGTATGAGTTTCTCA	1	AGAAACTCATACTGTATCTGTGC	1
AAACAATCTTTGACTCGTCCGTGT	1	ACGGACGAGTCAAAGATTGTTTCA	1			AATCATATGCATTCTCTTTCTTA	1	AGAAAGAGAATGCATATGATTGG	1
ACCACTTATTTTATCCGTCCGTTA	1	ACGGACGGATAAAATAAGTGGTGG	12			ACGATAGACGACACCTCTTTCTTC	2	AGAAAGAGGTGTCGTCTATCGTGG	9
AAGCACAGGTTGGATACTCCGTGA	4	ACGGAGTATCCAACCTGTGCTTGT	1			ACAGACGGCCTGAGTACTTTCTGC	2	AGAAAGTACTCAGGCCGTCTGTAT	17
ACGCTAAACTGTGATCCGTCC	1	ACGGATCACAGTTTAGCGTCG	1			ACTTTCTCTCTGCTACTTTCTTA	2	AGAAAGTAGCAGAGAGAAAGTTT	1
AACAAGAACTTAGGTGATCCGTCA	32	ACGGATCACCTAAGTTCTTGTTTA	1			AAACCCAACTGACAGACTTTCTAA	1	AGAAAGTCTGTCAGTTGGGTTTTG	15
ACAGTAAACGAAACACATCCGTGT	2	ACGGATGTGTTTCGTTTACTGTTC	1			AAACGAGCAGAAGGAACTTTCTAA	1	AGAAAGTTCCTTCTGCTCGTTTTT	1
AATGGTGAGTCGATTTGGCCGTGT	1	ACGGCCAAATCGACTCACCATTAA	1			ACAAACTTTCCGAGAACTTTCTAT	1	AGAAAGTTCTCGGAAAGTTTGTGC	1
AATAAGTGAGCTAGGCCGTCA	2	ACGGCCTAGCTCACTTATTCT	1			AATAGATTTAAGAAAACTTTCTAC	2	AGAAAGTTTTCTTAAATCTATTTT	1
AAGTAGAGCTGTGTGTCGCCGTCG	2	ACGGCGACACACAGCTCTACTTAC	1			AATGCAGACCTCTTTTATTTCTTC	1	AGAAATAAAAGAGGTCTGCATTCC	1
AAATTACAAACAAATACGCCGTGA	3	ACGGCGTATTTGTTTGTAATTTGG	3			ACATTGTACACATATTATTTCTTC	2	AGAAATAATATGTGTACAATGTCC	3
ACGATGTACAATTATAGCCGTTC	1	ACGGCTATAATTGTACATCGTTG	2			AAGGGTAGAACGGTCTATTTCTAT	3	AGAAATAGACCGTTCTACCCTTCA	1
AACGAAGTACAATTATAGCCGTTC	3	ACGGCTATAATTGTACTTCGTTGT	6			ACAAGCCATCATTATATTTCTCT	1	AGAAATATAATGATGGCTTGTAG	5
AAGTTAAAATCTAGTCAGCCGTAC	2	ACGGCTGACTAGATTTTAACTTGC	1			ACTTTTTGTAATCCGGATTTCTAT	1	AGAAATCCGGATTACAAAAAGTCT	5
ACACCATATAACCCCGTCCCGTGA	1	ACGGGACGGGGTTATATGGTGTGA	37			ACTTTTTGTAATCCGGATTTCTAT	1	AGAAATCCGGATTACAAAAAGTAT	1
AATTTCTTTACCCGTCCCGTAT	1	ACGGGACGGGTAAAGAAATTAC	7			AATGATATTCTGACGGATTTCTGA	2	AGAAATCCGTCAGAATATCATTAC	1
AACCGCACCGCACTTCTCCCGTAC	1	ACGGGAGAAGTGCGGTGCGGTTCA	8			AACAGATTTCTGATACATTTCTAT	3	AGAAATGTATCAGAAATCTGTTGT	1
ACCCGCAATACAACTCTCCCGTAT	1	ACGGGAGAGTTGTATTGCGGGTGA	4			AAAGGCCATTAGGACATTTCTTA	1	AGAAATGTCCTAATGGCCTTTAA	1
AAGTTTTGTGCCGAAGCCCGTAA	1	ACGGGCTTCGGCACAAAACTTCC	5			AAACAAACAATGCAACATTTCTTA	1	AGAAATGTTGCATTGTTTGTTTGA	2
AACATATAATTTTCGCCCCGTAA	1	ACGGGGCGAAAATTATATGTTCG	1			AATAGGATTAACACGAATTTCTTA	3	AGAAATTCGTGTTAATCCTATTAA	1
AACAGCTCGTCAGCTCACCCGTCT	1	ACGGGTGAGCTGACGAGCTGTTTG	2			AAGAGCAGACCGTTAAATTTCTAA	36	AGAAATTTAACGGTCTGCTCTTTT	71
AAAGTTATGTGTCAAAACCCGTAA	1	ACGGGTTTTGACACATAACTTTCT	2			AAGACTGTATCCTAAATTTCTAA	1	AGAAATTTAGGATACAGTCTTTA	3
AATATATAACGTTGTTTACCGTAA	2	ACGGTAAACAACGTTATATATTTT	1			AAAGACTGTATCCTAAATTTCTAA	54	AGAAATTTAGGATACAGTCTTTAT	13
ACAAGAATAGCTCATTTACCGTAC	1	ACGGTAAATGAGCTATTCTTGTCT	1			ACGCATCATTCAAATTTCTGC	2	AGAAATTTGAATGATGCGTCG	3
ACATCTCAAATTGCGTTACCGTAA	1	ACGGTAACGCAATTTGAGATGTCT	15			AATGTTTATTTCACAAATTTCTAA	1	AGAAATTTGTGAAATAAACATTCT	1
ACCCGCCGTCTACAGTACCGTCA	2	ACGGTACTGTAGACGGCGGGTGG	10			ACTTTGTTTACCAGTTTGTTCTCC	1	AGAACAAACTGGTAAACAAAGTGA	253
AAATCGTCCCGCGATATACCGTGA	1	ACGGTATATCGCGGGACGATTTAT	4			AATAACGATCAGTTGTTCTGT	2	AGAACAACTGATCGTTATTTC	1
AAGTCAGCCGCAACATACCGTAA	1	ACGGTATGTTGCGGCTGACTTAC	5			AAGGAGAGACAATCTGTGTTCTGG	1	AGAACACAGATTGTCTCTCCTTCA	2
AAGGACGAGGTCTTGACCGTCA	1	ACGGTCAAGACCTCGTCCTTTC	1			ACCGTATCGGTGATGTGTTCTTA	26	AGAACACATCACCGATACGGTTA	2
AAAGGACGAGGTCTTGACCGTCA	2	ACGGTCAAGACCTCGTCCTTTCT	5			AACCGTATCGGTGATGTGTTCTTA	1	AGAACACATCACCGATACGGTTAC	12
ACCGATCGACCGGCTGACCGTCT	1	ACGGTCAGCCGGTCGATCGGTCA	1			ACCGTATCAGTGATGTGTTCTTA	14	AGAACACATCACTGATACGGTTA	16
AAGGAAAAAAGAGCAGACCGTTA	35	ACGGTCTGCTCTTTTTTCCTTCA	3			AACCGTATCAGTGATGTGTTCTTA	2	AGAACACATCACTGATACGGTTAC	43
AATACTAAATTTGGCGCACCGTTC	1	ACGGTGCGCCAAATTTAGTATTAC	1			AAAAAGTTCTGTCGTGTTCTGG	1	AGAACACGACAGAACTTTTTTT	2
AACAGGAGATTCGATTAACCGTAG	1	ACGGTTAATCGAATCTCCTGTTAT	1			AAAAAAAGTTCTGTCGTGTTCTGG	2	AGAACACGACAGAACTTTTTTTAA	43
AAAAAGTTGCCAAATTAACCGTGA	1	ACGGTTAATTTGGCAACTTTTTGA	1			AAATATACCACAGTTCTGTTCTAA	2	AGAACAGAACTGTGGTATATTTGT	3
AACGATGTACAATTATAACCGTTC	1	ACGGTTATAATTGTACATCGTTGG	39			AACAGTAGAAGCCAGCTGTTCTCC	15	AGAACAGCTGGCTTCTACTGTTGT	1
AATTCCCTTCAATCTAAACCGTTC	5	ACGGTTTAGATTGAAGGGAATTAA	22			AACAGTAGAAGCCAGCTGTTCTCC	15	AGAACAGCTGGCTTCTACTGTTAT	1
ACCTTGTAGAAAGACAAACCGTGA	6	ACGGTTTGTCTTTCTACAAGGTAT	2			ACCGTATCGGTGATATGTTCTTA	8	AGAACATATCACCGATACGGTTA	1
AATTAACAGAACGGAAAACCGTAA	1	ACGGTTTTCCGTTCTGTTAATTAC	1			AACCGTATCGGTGATATGTTCTTA	1	AGAACATATCACCGATACGGTTAC	2
ACCGAGAACTGCTCAGTGACGTTT	1	ACGTCACTGAGCAGTTCTCGGTAA	1			ACGGCATCTAAATGTTGGTTCTGA	4	AGAACCAACATTTAGATGCCGTGA	1
AACTTTAAATAGGTAGGACGTGT	523	ACGTCCTACCTATTTAAAGTTTG	1			ACCATCCTTATTCATGGGTTCTTA	1	AGAACCCATGAATAAGGATGGTCT	11
ACCGGTTAGCGAAGGACGACGTAA	1	ACGTCGTCCTTCGCTAACCGGTAA	1			ACTAAAAGAGAAAGAGGGTTCTAA	6	AGAACCCTCTTTCTCTTTTAGTGT	2
AACTCACGAGATCATAAGACGTTT	2	ACGTCTTATGATCTCGTGAGTTAG	1			AATGTATGATACGGTCGGTTCTTA	5	AGAACCGACCGTATCATACATTGA	1
AACTCATAGGATCGTGTCACGTGT	46	ACGTGACACGATCCTATGAGTTAG	4			AAAAAAGTACGGTACGGTTCTAA	1	AGAACCGTACCGTACTTTTTTGC	3
AACTCATAGGATCGTGTCACGTGT	46	ACGTGACACGATCCTATGAGTTAA	2			AAGTTAACTCTGTGATCGTTCTGT	13	AGAACGATCACAGAGTTAACTTTC	1
AACTCATAGGATCGTGTCACGTGT	46	ACGTGACACGATCCTATGAGTTAT	1			AAGTTAACTCTGTGATCGTTCTGG	3	AGAACGATCACAGAGTTAACTTTC	1
AACACCAATAATAAAGTCACGTCA	2	ACGTGACTTTATTATTGGTGTTGA	1			AATAAAGAAGCTACTCCGTTCTCC	1	AGAACGGAGTAGCTTCTTTATTAA	1
AATGGAACCTAATTTCGCACGTAG	1	ACGTGCGAAATTAGGTTCCATTGA	1			AACATCCTTCTAAACCCGTTCTGC	2	AGAACGGGTTTAGAAGGATGTTAC	1
ACGAATCATAAGCCTCCACGTCA	1	ACGTGGAGGCTTATGATTCGTCT	1			ACAATCAAACGCTTTACGTTCTAC	1	AGAACGTAAAGCGTTTGATTGTAT	1
AATTCATAAGATTGTGCCACGTGC	1	ACGTGGCACAATCTTATGAATTAG	1			AATGAGTGATGGTTCAAGTTCTGA	7	AGAACTTGAACCATCACTCATTCT	2
AATTCATAGGATCGTGCCACGTGT	3	ACGTGGCACGATCCTATGAATTAG	3			AAAGAGTGATGGTTCAAGTTCTGA	22	AGAACTTGAACCATCACTCTTTTT	3
AACTCATAGGATCGTGCCACGTGT	21	ACGTGGCACGATCCTATGAGTTAG	3			AAAGAGTGATGGTTCAAGTTCTCA	8	AGAACTTGAACCATCACTCTTTTT	3
AACTCTTAAGATCGTGCCACGTGT	7	ACGTGGCACGATCTTAAGAGTTAG	2			AAAGCAAAGTAATAAAAGTTCTAT	3	AGAACTTTTATTACTTTGCTTTAA	3
ACCAACCGTATGCTGCCACGTCA	1	ACGTGGCAGCATACGGTTGGTTA	7			AATTTTTCGTCGTTCTTCTTC	4	AGAAGAACGACGAAAAATTAA	6
AACCAACCGTATGCTGCCACGTCA	1	ACGTGGCAGCATACGGTTGGTTAG	4			AAATTTAATCGATCGTTCTTCTTG	1	AGAAGAACGATCGATTAAATTTAA	1
ACACTCTACTTTGATGACACGTGT	1	ACGTGTCATCAAAGTAGAGTGTCA	1			ACGACAGACGACATCTTCTTCTCC	1	AGAAGAAGATGTCGTCTGTCGTGG	23
AACTCACGAGATCATGACACGTGG	1	ACGTGTCATGATCTCGTGAGTTAC	3			AACCTAGACGACACCTTCTTCTCT	1	AGAAGAAGGTGTCGTCTAGGTTGA	1
AACTCACGAGATCATGACACGTGG	1	ACGTGTCATGATCTCGTGAGTTAG	3			ACCGTCCATCCTTGATTCTTCTGA	2	AGAAGAATCAAGGATGGACGGTTT	726
AACTCACAAGATCATGACACGTGT	1	ACGTGTCATGATCTTGTGAGTTAG	2			ACGACAGACGATACATTCTTCTCC	1	AGAAGAATGTATCGTCTGTCGTGG	22
AACCAACACATCGTCACACGTAC	1	ACGTGTGACGATGTGTTGGTTTA	1			ACGACAGACGACACATTCTTCTCA	3	AGAAGAATGTGTCGTCTGTCGTGG	126
AAACCAACACATCGTCACACGTAC	13	ACGTGTGACGATGTGTTGGTTTAT	5			AGAAAATCACTCAAATTCTTCTTC	1	AGAAGAATTTGAGTGATTTTCTAT	1
AAGTAGCCAGTCATTTTAACGTCA	1	ACGTTAAAATGACTGGCTACTTAT	8			AAGCCGATGCACAAATTCTTCTTT	1	AGAAGAATTTGTGCATCGGCTTAC	1
AAGATGCAGGCAAAGTTAACGTAG	1	ACGTTAACTTTGCCTGCATCTTAC	1			AAGTGTTGAAGCCCGTCTTCTCA	1	AGAAGACGGGCTTCAACACTTAT	1
ACGTCTCCGGACTCCCTAACGTTG	1	ACGTTAGGGAGTCCGGAGACGTCG	28			AATATATATGGAGAGTCTTCTGT	2	AGAAGACTCTCCATATATATTGG	11
ACCAACCGTATGCTGCAACGTCA	1	ACGTTGCAGCATACGGTTGGTCA	1			ACCAGCACGGAGACTCTCTTCTTT	1	AGAAGAGAGTCTCCGTGCTGGTAA	1
ACCTGATATCGGGGGACAACGTAA	1	ACGTTGTCCCCCGATATCAGGTAA	1			ACGACAGACGATACCTCTTCTCA	5	AGAAGAGGTATCGTCTGTCGTGG	3
ACGGCATTACGGTAAACAACGTTA	43	ACGTTGTTTACCGTAATGCCGTCG	43			AACCTCATACAATAACTCTTCTAG	1	AGAAGAGTTATTGTATGAGGTTTA	4
AAGATGGCAGCATAGTAAACGTTG	85	ACGTTTACTATGCTGCCATCTTGA	2			ACATAGCAATTCAAGATCTTCTAA	1	AGAAGATCTTGAATTGCTATGTGT	14
AAAGACAAAGATCAGAAAACGTTG	2	ACGTTTTCTGATCTTTGTCTTTTC	1			AATCCCGTCGCTGTCATCTTCTTT	1	AGAAGATGACAGCGACGGGATTGA	254
AAACGAACAGACTTAAAAACGTAT	1	ACGTTTTTAAGTCTGTTCGTTTAA	1			ACAGAGACAGGTGGCATCTTCTGC	2	AGAAGATGCCACCTGTCTCTGTTG	1
AATGTGCAACTCTCTTTTTAGTTT	3	ACTAAAAAGAGAGTTGCACATTGA	1			AAAGATATTTCTTGAATCTTCTGA	30	AGAAGATTCAAGAAATATCTTTGA	1
AAGCAAACGAACAACTTTTAGTCG	2	ACTAAAAGTTGTTCGTTTGCTTGT	6			AAACAAAATGCATAAATCTTCTAA	1	AGAAGATTTATGCATTTTGTTTGT	7
AACGACACTTAACTATTTTAGTAG	1	ACTAAAATAGTTAAGTGTCGTTGA	1			AGAAAACAGAACCAAATCTTCTCC	2	AGAAGATTTGGTTCTGTTTTCTTT	74
AAATTGCGTCGTTTGGTTTAGTAA	1	ACTAAACCAAACGACGCAATTTAG	1			AAAGTTCCATTGTCTTGCTTCTTT	1	AGAAGCAAGACAATGGAACTTTTC	6
AAGTGATATGATGCGGTTTAGTAC	1	ACTAAACCGCATCATATCACTTAT	1			AACAAAACTATTGAGTGCTTCTAA	1	AGAAGCACTCAATAGTTTTGTTAG	1
AACAAATTCTGTAGAGTTTAGTTG	1	ACTAAACTCTACAGAATTTGTTGG	2			AATGTTCCATTGTCCTGCTTCTTT	1	AGAAGCAGGACAATGGAACATTTC	1
AATTTAAGTGGATGTCTTTAGTTG	1	ACTAAAGACATCCACTTAAATTTG	1			AAGTTCCATTGTCCTGCTTCTTT	1	AGAAGCAGGACAATGGAACTTCT	2
ACCGACATCTGAGATCTTTAGTCA	1	ACTAAAGATCTCAGATGTCGGTTC	2			ACAAAATAAGGAATGCTTCTGA	12	AGAAGCATTCCTTATTTTGTTC	4
AACAGTAGACAGCTTTGTTAGTGT	1	ACTAACAAAGCTGTCTACTGTTTC	1			AAGTTCCTCGCAAATCGCTTCTCG	1	AGAAGCGATTTGCGAGGAACTTGA	2
AAGGACGAAAACAGTTGTTAGTTA	5	ACTAACAACTGTTTTCGTCCTTAA	1			ACTTCACCAAACAGCAGCTTCTTT	1	AGAAGCTGCTGTTTGGTGAAGTGG	1
AACCGTAGTACCACATGTTAGTTA	1	ACTAACATGTGGTACTACGGTTAA	1			ACGACAGACGACACTTCCTTCTCC	3	AGAAGGAAGTGTCGTCTGTCGTGG	16
ACCGGACGGGTAAATGGTTAGTAA	4	ACTAACCATTTACCCGTCCGGTCC	1			ACGACAGACGACACTTCCTTCTTA	1	AGAAGGAAGTGTCGTCTGTCGTGG	16
AATTAGATCTCCCGTCGTTAGTTA	2	ACTAACGACGGGAGATCTAATTGA	2			ACGCATATGGGATTGTCCTTCTAA	3	AGAAGGACAATCCCATATGCGTGC	1
AAGATGGTCTGCAGTTAGTAC	1	ACTAACTGCAGACCATCTTTA	1			ACGACAGACGACACCTCCTTCTCC	2	AGAAGGAGGTGTCGTCTGTCGTGG	65
ACAGGTGAGAAATCTGCTTAGTGG	15	ACTAAGCAGATTTCTCACCTGTGC	5			AACCACACGCACCATCCCTTCTAT	1	AGAAGGGATGGTGCGTGTGGTTGC	2
AACAAACCGATGCGGACTTAGTTT	1	ACTAAGTCCGCATCGGTTTGTTGT	1			AAAATACTTAATCCTACCTTCTAA	2	AGAAGGTAGGATTAAGTATTTTGA	8
AAACGGACAATATCATATTAGTAG	1	ACTAATATGATATTGTCCGTTTTG	1			AAAAAAACTACCTACTTCTCA	1	AGAAGTAGGTAGTTTTTTTTA	1
AACCACAGCATGTAATATTAGTTT	2	ACTAATATTACATGCTGTGGTTTC	3			AAATACTTTAGCGTGGACTTCTTC	1	AGAAGTCCACGCTAAAGTATTTTA	2
AACAATCAAAATACGAATTAGTTA	1	ACTAATTCGTATTTTGATTGTTGG	6			AATAATACAGGACCACACTTCTAA	1	AGAAGTGTGGTCCTGTATTATTAT	13
AACGTCCAAATAAAAATTAGTTA	1	ACTAATTTTTATTTGGACGTTTA	6			ACTTTATGACTCTATAACTTCTAT	4	AGAAGTTATAGAGTCATAAAGTTT	64
AAACGTCCAAATAAAAATTAGTTG	1	ACTAATTTTTATTTGGACGTTTAA	1			AAACACTCTTACAAGAACTTCTCT	3	AGAAGTTCTTGTAAGAGTGTTTTA	1
AAATAGGTAGAAACTTTGTAGTGT	1	ACTACAAAGTTTCTACCTATTTAT	4			ACAACTTTCTTATACAACTTCTTC	1	AGAAGTTGTATAAGAAAGTTGTTA	1
ACATGACGAATGAATTGTAGTTA	1	ACTACAATTCATTCGTCATGTTC	1			AAGATGCAATTGAGTTTATTCTGA	1	AGAATAAACTCAATTGCATCTTAA	3
AAACAATCAAACATAGTGTAGTTT	1	ACTACACTATGTTTGATTGTTTTC	1			AAAGTTTCTACCTATTTATTCTCA	2	AGAATAAATAGGTAGAAACTTTGT	12
AAAGCAAATAGGAAAATGTAGTAT	4	ACTACATTTTCCTATTTGCTTTGC	1			AAAGTTTCTACCTATTTATTCTCT	1	AGAATAAATAGGTAGAAACTTTGT	12
AATAGATTTAGATGGTAGTTC	28	ACTACCATCTAAATCTATTGA	1			ACTGGCAAGAGAGACTATTCTCA	1	AGAATAGTCTCTCTTGCCAGTTT	1
AAAAATAGGTTGATAGGGTAGTTT	1	ACTACCCTATCAACCTATTTTTAA	1			AGAACAAACCGGCGGATATTCTTG	54	AGAATATCCGCCGGTTTGTTCTGT	1
AAATCTCAGTCTAATTCGTAGTTC	1	ACTACGAATTAGACTGAGATTTCA	1			ACAGGTATACGGTACATATTCTGA	1	AGAATATGTACCGTATACCTGTTG	1
ACAGAATATATTTAGTCGTAGTTC	1	ACTACGACTAAATATATTCTGTAT	1			AAATCCAAGCAAACATATTCTTA	3	AGAATATGTTTGCTTGGATTTCA	3
ACAAAGGGCAGGGACGTAGTCA	2	ACTACGTCCCTGCCCTTTGTAC	2			AATTCATACAAACATATTCTTA	1	AGAATATGTTTGTATGAATTTC	1
AAGAGCATCTCCATTAGTAGTCT	4	ACTACTAATGGAGATGCTCTTAT	1			AAATTCATACAAACATATTCTTA	3	AGAATATGTTTGTATGAATTTCA	6
AAGAGCATCTCCATCAGTAGTCT	1	ACTACTGATGGAGATGCTCTTAA	4			AAACGACATAGGAGAATATTCTAA	3	AGAATATTCTCCTATGTCGTTTGT	1
AAATGCAGCGACGTGTTCTAGTCA	1	ACTAGAACACGTCGCTGCATTTTT	1			AAAGGCAAGAGCACAAGATTCTAT	3	AGAATCTTGTGCTCTTGCCTTTTT	2
AAGTTAATTTTGATTGTCTAGTAA	18	ACTAGACAATCAAAATTAACTTAT	1			ACGACAGACGACATCTCATTCTTC	2	AGAATGAGATGTCGTCTGTCGTGG	2
AAAAGTCCGCTGATCGTCTAGTTC	1	ACTAGACGATCAGCGGACTTTTAT	1			AAACAATCGTTCCATCATTCTCT	1	AGAATGATGGAACGATTGTTTTT	3
ACCCCATAATCACATGCCTAGTCT	1	ACTAGGCATGTGATTATGGGGTAT	1			AAAATCCCTTGTAAATCATTCTAT	3	AGAATGATTTACAAGGGATTTTAA	1
AACAGACTGTTCAGACCTAGTGA	1	ACTAGGTCTGAACAGTCTGTTAA	2			ACGGTTCTGCTTGCAGCATTCTGG	2	AGAATGCTGCAAGCAGAACCGTTC	1
ACGGTTATAGCAGTGAACTAGTGA	18	ACTAGTTCACTGCTATAACCGTAT	1			ACTTGTTTGAGAAGTCCATTCTAT	1	AGAATGGACTTCTCAAACAAGTAA	7
AATGTGAAGCAGAGGAGATAGTGT	6	ACTATCTCCTCTGCTTCACATTAT	1			ACAAGATCATTCTCTCAATTCTTT	1	AGAATTGAGAGAATGATCTTGTGT	1
AAAGACGATTCAGGAAGATAGTGA	2	ACTATCTTCCTGAATCGTCTTTAA	1			AATCAAAACAGTAACCAATTCTCC	1	AGAATTGGTTACTGTTTTGATTGC	91
AAAAATAAGCGTCCGGCATAGTTG	2	ACTATGCCGGACGCTTATTTTTCA	1			AAAACATAACGACGGAAATTCTAA	5	AGAATTTCCGTCGTTATGTTTTCT	1
AATCTCAAGATGGCAGCATAGTAA	40	ACTATGCTGCCATCTTGAGATTGT	5			ACAAGCTTGGACCCCAAATTCTTT	1	AGAATTTGGGGTCCAAGCTTGTCT	4
ACAATGCTTCCCAATTAATAGTAT	1	ACTATTAATTGGGAAGCATTGTGT	1			AGAAGTTCAAGCTAAAAATTCTAC	2	AGAATTTTTAGCTTGAACTTCTAG	1
AACGTACGTCTCAAATAATAGTGT	1	ACTATTATTTGAGACGTACGTTAA	1			AAAGTAAATTTTTTTGTCTGA	5	AGACAAAAAAATTTACTTTAA	2
AAGGGCATCTCCATCAATAGTAT	1	ACTATTGATGGAGATGCCCTTAG	1			ACCAAAAGTTGTTCGTTTGTCTGT	8	AGACAAACGAACAACTTTTGGTCG	1
AAGTAGCCGCCGGTTAAATAGTTG	1	ACTATTTAACCGGCGGCTACTTGA	2			ACTATGAATGTCCGTGTTGTCTGC	3	AGACAACACGGACATTCATAGTGC	7
ACGGATCAAATACGCAAATAGTTA	3	ACTATTTGCGTATTTGATCCGTCA	2			AAAATGAGTGTAAGTGTTGTCTGA	1	AGACAACACTTACACTCATTTTCT	4
AAAGTAGACGATAAGCTTGAGTTC	1	ACTCAAGCTTATCGTCTACTTTTC	1			AAAATGGGTATAAGTGTTGTCTAA	3	AGACAACACTTATACCCATTTTCT	4
ACGTGTCATGATCTCGTGAGTTA	2	ACTCACGAGATCATGACACGTGG	1			AAAATGGGTATAAGTGTTGTCTAA	3	AGACAACACTTATACCCATTTTGT	2
ACAAATCATCACACCAGTGAGTGC	1	ACTCACTGGTGTGATGATTTGTCA	4			AAAATGGGTATAAGTGTTGTCTAA	3	AGACAACACTTATACCCATTTTGC	2
AACCACATTGTTTGATCTGAGTTT	26	ACTCAGATCAAACAATGTGGTTGC	1			AAAATGGGTATAAGTGTTGTCTAA	3	AGACAACACTTATACCCATTTTCC	1
AAACGAATAACACCCCCTGAGTCT	1	ACTCAGGGGGTGTTATTCGTTTAT	1			AATGTCCGTGCTGATTGTCTTG	3	AGACAATCAGCACGGACATTGT	2
ACGTGGCACGATCCTATGAGTTA	1	ACTCATAGGATCGTGCCACGTGT	1			ACAATGTCCGTGCTGATTGTCTTG	40	AGACAATCAGCACGGACATTGTTT	36
ACGTGACACGATCCTATGAGTTA	6	ACTCATAGGATCGTGTCACGTGT	3			AAGGTTATGTTCTCCGGTGTCTAC	1	AGACACCGGAGAACATAACCTTAT	2
ACGTGGCACAATCCTATGAGTTA	2	ACTCATAGGATTGTGCCACGTGT	2			AAAGGTCTAGAACACAGTGTCTGC	10	AGACACTGTGTTCTAGACCTTTTA	1
AAAACGATTCCAAGATATGAGTGA	1	ACTCATATCTTGGAATCGTTTTAT	2			AATTTGTTTGGGAAGTCTGTCTGT	4	AGACAGACTTCCCAAACAAATTAT	2
AAAGATGCAAAAATAGATGAGTTA	1	ACTCATCTATTTTTGCATCTTTAT	1			ACCTGGTATAGGTCTCTGTCTTT	1	AGACAGAGACCTATACCAGGTTA	2
AACCCATGAACCCTAATGAGTTA	1	ACTCATTAGGGTTCATGGGTTGA	1			ACCATTCAAAGCGGATATGTCTCC	5	AGACATATCCGCTTTGAATGGTAA	2
AATGCCGTCGAAAATGAGTAT	1	ACTCATTTTCGACGGCATTAC	14			AATGACTGATAGCGGCATGTCTAT	4	AGACATGCCGCTATCAGTCATTAA	1
ACCAATTGGCAATAGGTGGAGTGA	1	ACTCCACCTATTGCCAATTGGTTT	1			ACGGAAATTTAACGGCATGTCTTA	1	AGACATGCCGTTAAATTTCCGTTA	2
ACGGTCTAAAAGTTATGGAGTCA	84	ACTCCATAACTTTTAGACCGTGA	2			AATGACTGATAACGGCATGTCTAT	12	AGACATGCCGTTATCAGTCATTAA	2
AATCTGGGCAATAGATGGAGTGG	7	ACTCCATCTATTGCCCAGATTAG	1			AATGACTGATAACGGCATGTCTGT	2	AGACATGCCGTTATCAGTCATTAA	2
AAGAACGACGACGCGTGGGAGTGG	1	ACTCCCACGCGTCGTCGTTCTTGC	1			AAACTATTTCAACACAATGTCTAC	2	AGACATTGTGTTGAAATAGTTTGT	3
ACATTGTTTCTGCAGAGGGAGTTT	2	ACTCCCTCTGCAGAAACAATGTGA	3			AATTTGTGATTGTCGTTGGTCTAC	4	AGACCAACGACAATCACAAATTAC	1
AATGCATCGACGACACCGGAGTAA	16	ACTCCGGTGTCGTCGATGCATTGC	1			AAGAAAGAGAGTGTGGTCTGA	1	AGACCACACTCTCTTTCTTCA	1
AATTAAAGCCCTAATTTCGAGTTT	1	ACTCGAAATTAGGGCTTTAATTAG	1			AATAATATCTGTAAAGTGGTCTAT	3	AGACCACTTTACAGATATTATTAT	1
AAAGATGGTCTCATGTCGAGTTG	2	ACTCGACATGAGACCATCTTTAT	1			AAGTCAAATTCGCTTATGGTCTGG	1	AGACCATAAGCGAATTTGACTTGG	1
AACGTGTCTTATTTGGTCGAGTCA	1	ACTCGACCAAATAAGACACGTTGT	1			AAAACGATGATGGAGATGGTCTAA	1	AGACCATCTCCATCATCGTTTTTC	2
ACAGAGCAACAGGAGATCGAGTAT	2	ACTCGATCTCCTGTTGCTCTGTAG	1			AAGGATTATGGATTTAGGGTCTAG	2	AGACCCTAAATCCATAATCCTTAA	1
AAAATATGATTGCCTTGCGAGTTA	1	ACTCGCAAGGCAATCATATTTTAG	1			AATCTAACCTGGTGTCGGTCTCG	2	AGACCGACACCAGGTTAGATTCA	1
AACGATTCTCTTACCTGCGAGTTA	1	ACTCGCAGGTAAGAGAATCGTTTC	3			AGACAGTTAGAACTAGCGGTCTTG	27	AGACCGCTAGTTCTAACTGTCTGC	1
ACAACAATCCATCCATTAGAGTAT	1	ACTCTAATGGATGGATTGTTGTTT	42			AAAGATACACCATCCCCGGTCTTA	1	AGACCGGGGATGGTGTATCTTTAT	5
ACGGTCTAAAAGTTCTAGAGTCA	2	ACTCTAGAACTTTTAGACCGTGA	4			AAGTTTGGCCTCACGGTCTAA	1	AGACCGTGAGGCCAAACTTGG	1
ACGGTCTAAAAGTTCTAGAGTCA	2	ACTCTAGAACTTTTAGACCGTCA	2			AATGGTAAATAAAAAACGGTCTGA	1	AGACCGTTTTTTATTTACCATTCA	1
ACAGTTCAACTGTGAATAGAGTAC	32	ACTCTATTCACAGTTGAACTGTAT	2			AAGCCCGTAATCCCCTAGGTCTGA	1	AGACCTAGGGGATTACGGGCTTCA	8
AAAGCTCGAACCCTTGGAGAGTGT	10	ACTCTCCAAGGGTTCGAGCTTTCC	1			AAGGTCTTGAAGGTGGAGGTCTCT	4	AGACCTCCACCTTCAAGACCTTAT	1
AATGGTATGGCCCTGAGAGAGTCT	1	ACTCTCTCAGGGCCATACCATTGA	1			AAAGAAGAAATAACAGAGGTCTGC	1	AGACCTCTGTTATTTCTTCTTTTT	1
AAAATGAAGGAGAGAGAGTGT	1	ACTCTCTCTCCTTCATTTTCA	1			AACGTAATGTGAGTCCAGGTCTTC	2	AGACCTGGACTCACATTACGTTAA	1
AAGTCGCGTTATCCTGCAGAGTAA	1	ACTCTGCAGGATAACGCGACTTAG	5			AGACACCTTCTTCACCAGGTCTGA	1	AGACCTGGTGAAGAAGGTGTCTTC	5
ACCATATTCCTGAAACCAGAGTGT	1	ACTCTGGTTTCAGGAATATGGTAG	5			AATTCATAAACAATGTTCGTCTTA	2	AGACGAACATTGTTTATGAATTGT	1
ACGCACCGAAGTACTACAGAGTGG	1	ACTCTGTAGTACTTCGGTGCGTTT	1			ACCCGTCCCTCCAAATTCGTCTTG	1	AGACGAATTTGGAGGGACGGGTTT	12
AAAAGTTAAGAAAAAACAGAGTGA	2	ACTCTGTTTTTTCTTAACTTTTAT	1			ACTTCTTCTTTTTTTGTCGTCTGA	1	AGACGACAAAAAAAGAAGAAGTTT	4
ACGTGGCACGATCTTAAGAGTTA	3	ACTCTTAAGATCGTGCCACGTGT	1			ACAGAGGTAAGTGTTGTCGTCTGA	1	AGACGACAACACTTACCTCTGTAT	1
AAAATGTCGATTCTCCAAGAGTAG	1	ACTCTTGGAGAATCGACATTTTGT	1			AACTGTTTTTACTTGTCGTCTGA	3	AGACGACAAGTAAAAACAGTTTT	2
AAACTTGACAAGGGAAAAGAGTGC	1	ACTCTTTTCCCTTGTCAAGTTTTG	2			AAACTGTTTTTACTTGTCGTCTGA	51	AGACGACAAGTAAAAACAGTTTTT	2
ACCAAGAGGAGGGAAAAAGAGTGC	1	ACTCTTTTTCCCTCCTCTTGGTTT	1			ACATATCTTAAGTGTCGTCTTT	188	AGACGACACTTAAGATATGTAT	27
AAGTGCACATATCTTTTCAGTTA	3	ACTGAAAAGATATGTGCACTTTG	2			AAGTATCCTTGATCTGTCGTCTAG	2	AGACGACAGATCAAGGATACTTAT	9
AAAGTGCACATATCTTTTCAGTTA	9	ACTGAAAAGATATGTGCACTTTGA	24			AAAGCAGTTTAGGCGGTCGTCTAT	1	AGACGACCGCCTAAACTGCTTTTC	1
AATCACGGCGTTAACTTTCAGTTA	6	ACTGAAAGTTAACGCCGTGATTGT	23			AAACAAGTAATCAGGTCGTCTGC	7	AGACGACCTGATTACTTGTTTGA	7
ACGACGATCGTCGGATTTCAGTAA	1	ACTGAAATCCGACGATCGTCGTCA	12			AAGTGATTTTCATTCGTCGTCTTT	2	AGACGACGAATGAAAATCACTTAT	1
AATTTGGCGGGAAAATTTCAGTTT	2	ACTGAAATTTTCCCGCCAAATTTT	1			AAAGATTTTGGGAACGTCGTCTTA	15	AGACGACGTTCCCAAAATCTTTCT	1
AATTTTCGTGTTGGTTCAGTTG	1	ACTGAACCAACACGAAAATTCC	1			AATTCATTAACAGTCGTCTCA	1	AGACGACTGTTAATGAATTGA	1
AAGTGACATGAAGCGGTTCAGTGC	2	ACTGAACCGCTTCATGTCACTTAT	1			ACCACTCACTTCTTATCGTCTTA	1	AGACGATAAGAAGTGAGTGGTTA	1
AAGTTATATGAAACGGTTCAGTGC	1	ACTGAACCGTTTCATATAACTTAT	1			AACCACTCACTTCTTATCGTCTTA	4	AGACGATAAGAAGTGAGTGGTTAT	1
ACGACGGTCCATACTATTCAGTTC	2	ACTGAATAGTATGGACCGTCGTTG	2			AGAAAGTTTCACATTATCGTCTTC	29	AGACGATAATGTGAAACTTTCTTA	1
AAAACAGTCTTGAGAATTCAGTAT	1	ACTGAATTCTCAAGACTGTTTTAC	1			AGAAAGTTTCACATTATCGTCTTC	29	AGACGATAATGTGAAACTTTCTGA	1
ACAAAAGATGCATGTCAGTAT	1	ACTGACATGCATCTTTTGTTA	1			AAGAGCCAACTTGTATCGTCTTC	2	AGACGATACAAGTTGGCTCTTTC	13
AATGCAGTAGGTGTGGTCAGTCG	1	ACTGACCACACCTACTGCATTTA	1			AAAGAGCCAACTTGTATCGTCTTC	40	AGACGATACAAGTTGGCTCTTTCC	31
AACAGTTCATATGGTAGTCAGTAA	1	ACTGACTACCATATGAACTGTTTT	1			AAAAAAGCCCATTGACGCGTCTCA	1	AGACGCGTCAATGGGCTTTTTTAT	3
ACCACCTATCCTTCTCAGTTA	1	ACTGAGAAGGATAGGTGGTAG	3			ACTAACCACAACATATCCGTCTCA	1	AGACGGATATGTTGTGGTTAGTGC	4
AACGGTAAAATACATTCTCAGTCC	1	ACTGAGAATGTATTTTACCGTTGG	1			AGAAATCTTTGATGATCCGTCTTT	3	AGACGGATCATCAAAGATTTCTTA	1
ACATCCGGTCAGCATCATCAGTAC	114	ACTGATGATGCTGACCGGATGTCA	57			AACGCCTATGATTCTCCCGTCTCA	1	AGACGGGAGAATCATAGGCGTTGA	1
AATACACACGATAATCATCAGTTA	1	ACTGATGATTATCGTGTGTATTGA	1			AAGTTATTATTTTTTACCGTCTAG	1	AGACGGTAAAAAATAATAACTTAA	5
ACTCGATCTCTAGGCCATCAGTAG	1	ACTGATGGCCTAGAGATCGAGTAT	1			ACTGAATTGTCAACGTCTAC	1	AGACGTTGACAATTCAGTAG	2
ACTCGATCTCTAGGCCATCAGTAG	1	ACTGATGGCCTAGAGATCGAGTAC	1			AACGAGTTGGCCAGAAACGTCTCT	7	AGACGTTTCTGGCCAACTCGTTTT	1
AAATATCGTCAATCCCATCAGTAC	6	ACTGATGGGATTGACGATATTTAG	81			AACGGCATGTCTATTTTAGTCTGG	3	AGACTAAAATAGACATGCCGTTAT	2
AAAGTCAAAACAACCAATCAGTTC	1	ACTGATTGGTTGTTTTGACTTTTA	1			AAGTAATGGTTTTTGGTAGTCTGA	1	AGACTACCAAAAACCATTACTTCT	1
ACCCATTTCTTGTGCCGGCAGTTA	3	ACTGCCGGCACAAGAAATGGGTTT	10			AAGTACATATGTTATATAGTCTCT	2	AGACTATATAACATATGTACTTAA	2
AATCAAAGCCACCACCGGCAGTTT	1	ACTGCCGGTGGTGGCTTTGATTGT	3			AATTTTCAGTGGTAGATAGTCTAG	5	AGACTATCTACCACTGAAAATTAA	1
AATACCAGTTACCACGCAGTTG	14	ACTGCGTGGTAACTGGTATTCA	8			AACCCTAAATTAATCATAGTCTAC	9	AGACTATGATTAATTTAGGGTTTG	1
AAAACGCAGCGTCAAACGCAGTTT	1	ACTGCGTTTGACGCTGCGTTTTGC	1			ACGCAGTCACCGTTCGGAGTCTGA	1	AGACTCCGAACGGTGACTGCGTTT	60
ACCTTTCTATCATGTGAGCAGTTA	1	ACTGCTCACATGATAGAAAGGTAA	2			AGAACAATCAGCCACGGAGTCTCT	1	AGACTCCGTGGCTGATTGTTCTGG	7
ACAGGATGCAGTAAACAGCAGTAG	4	ACTGCTGTTTACTGCATCCTGTCA	2			ACGGTAACGACGACCAGAGTCTTG	2	AGACTCTGGTCGTCGTTACCGTTC	5
ACAGGATGCAGTAAACAGCAGTAA	1	ACTGCTGTTTACTGCATCCTGTCA	2			AAATTCGTGCTTGTTCAGTCTCA	1	AGACTGAACAAGCACGAATTTTA	11
ACTAATCTGTCAGCGGTCCAGTCC	1	ACTGGACCGCTGACAGATTAGTCC	3			AATAACGGTCCGGTTACAGTCTAA	1	AGACTGTAACCGGACCGTTATTAA	8
AACATCACTCCCGGTATCCAGTAA	1	ACTGGATACCGGGAGTGATGTTAG	1			AGAAATTTAGGATACAGTCTTT	15	AGACTGTATCCTAAATTTCTAA	3
AACCATCCGGAAGATATCCAGTTT	2	ACTGGATATCTTCCGGATGGTTTA	1			ACAACATTTGTTTGGGAAGTCTGG	5	AGACTTCCCAAACAAATGTTGTTA	1
AAACCCTATCCGCTGATCCAGTCA	10	ACTGGATCAGCGGATAGGGTTTAT	29			AAGTATGACGGTTCGCAAGTCTGA	1	AGACTTGCGAACCGTCATACTTGT	2
AACATCTCTCCCGGCATCCAGTAA	1	ACTGGATGCCGGGAGAGATGTTAG	1			AAACACCATCTTCACCAAGTCTGA	4	AGACTTGGTGAAGATGGTGTTTTC	1
AAGCCCACTACAGAAGCCCAGTCA	1	ACTGGGCTTCTGTAGTGGGCTTTG	1			AGAAATGCAGTTTTTTTTCTCTTT	1	AGAGAAAAAAAACTGCATTTCTAA	1
AACATATATCCCTCTGACCAGTTT	1	ACTGGTCAGAGGGATATATGTTGT	5			AACGACACTTGGTTTTTTCTCTCA	1	AGAGAAAAAACCAAGTGTCGTTAG	3
ACATTAGACCATCTCCACCAGTAA	2	ACTGGTGGAGATGGTCTAATGTTC	1			AAACAAAAGCTCTTTTTTCTCTAA	1	AGAGAAAAAAGAGCTTTTGTTTAG	1
ACTGCCTTTCTCCTGAACCAGTGG	1	ACTGGTTCAGGAGAAAGGCAGTTT	1			ACCCTACTCTATTTTTTCTCTAA	1	AGAGAAAAAATAGAGTAGGGTTA	2
ACCCGTGACCCGATGAACCAGTTG	1	ACTGGTTCATCGGGTCACGGGTTA	3			AACACTTATACCCATTTTCTCTCA	1	AGAGAAAATGGGTATAAGTGTTGT	1
AAATCCAATGATATAAACCAGTTA	1	ACTGGTTTATATCATTGGATTTGT	3			AATCAAGCGACGACGTTTCTCTCG	1	AGAGAAACGTCGTCGCTTGATTCA	1
AAAACCACCCGCCGTCTACAGTAC	2	ACTGTAGACGGCGGGTGGTTTTCA	5			AAACAGAAACCCAACTTTCTCTCT	2	AGAGAAAGTTGGGTTTCTGTTTTT	1
AAATCTGAGCCGCTTATACAGTAA	1	ACTGTATAAGCGGCTCAGATTTTG	1			AACGTAAAACTACGATTTCTCTAT	1	AGAGAAATCGTAGTTTTACGTTGG	6
ACCCAAACAACCATTATACAGTAA	1	ACTGTATAATGGTTGTTTGGGTTA	4			AACAAGTCAGAATTTCTCTCA	2	AGAGAAATTCTGACTTGTTGT	2
AACACAACACAGCTTTGACAGTTA	9	ACTGTCAAAGCTGTGTTGTGTTAC	1			ACAACAAGTCAGAATTTCTCTCA	1	AGAGAAATTCTGACTTGTTGTGC	1
AAAGACCATATAATTCGACAGTTT	1	ACTGTCGAATTATATGGTCTTTTT	2			AAGGAAATTACAAACGTTCTCTTT	1	AGAGAACGTTTGTAATTTCCTTGT	3
AAAACATATACAACTCACAGTTT	9	ACTGTGAGTTGTATATGTTTTGT	3			AAAGGCCAATAAGTTCTCTCG	1	AGAGAACTTATTGGCCTTTTG	4
AATGGTAACCGAACCGCACAGTGC	1	ACTGTGCGGTTCGGTTACCATTTA	1			AAAAGGCCAATAAGTTCTCTCG	3	AGAGAACTTATTGGCCTTTTGC	17
ACGCCAGCAGTAGACAACAGTTC	3	ACTGTTGTCTACTGCTGGCGTCA	1			AAAGCCGAATTCGATCTTCTCTGA	5	AGAGAAGATCGAATTCGGCTTTGG	1
ACGTGTAAGCCGGTGAAACAGTAG	11	ACTGTTTCACCGGCTTACACGTGT	6			AATGACCTTTATAACCTTCTCTTG	1	AGAGAAGGTTATAAAGGTCATTTA	1
AAGATCTGGTTGCGGTTTAAGTTC	32	ACTTAAACCGCAACCAGATCTTAA	1			AACTAGCAAAGCTTGATTCTCTCT	1	AGAGAATCAAGCTTTGCTAGTTAC	1
AAGATCTGGTTGCGGTTTAAGTTA	1	ACTTAAACCGCAACCAGATCTTAA	1			ACACAAGGAACCACCATTCTCTAC	1	AGAGAATGGTGGTTCCTTGTGTTG	3
AAGATCGGGTTGCGGTTTAAGTTC	108	ACTTAAACCGCAACCCGATCTTAA	4			AAAATCTAAACCCTAATTCTCTTT	1	AGAGAATTAGGGTTTAGATTTTGT	2
AAGATCGGGTTGCGGTTTAAGTTC	108	ACTTAAACCGCAACCCGATCTTGT	1			AAGAGATAGGCAGCAATTCTCTCT	2	AGAGAATTGCTGCCTATCTCTTTA	1
AAGATCGGGTTGCGGTTTAAGTTC	108	ACTTAAACCGCAACCCGATCTTAT	1			ACATCATTATTGGTTGTCTCTTA	1	AGAGACAACCAATAATGATGTTC	1
AAGATCGGGTTGCGGTTTAAGTTG	69	ACTTAAACCGCAACCCGATCTTAA	4			ACTTGGTGTGGCTCTCGTCTCTAG	1	AGAGACGAGAGCCACACCAAGTTA	37
AAGATCGGGTTGCGGTTTAAGTTG	69	ACTTAAACCGCAACCCGATCTTGT	1			AAGGCACCACGTCATCGTCTCTCA	3	AGAGACGATGACGTGGTGCCTTAT	1
AAGATCGGGTTGCGGTTTAAGTTG	69	ACTTAAACCGCAACCCGATCTTAT	1			AAATAATCGCAGAGGAGTCTCTAC	2	AGAGACTCCTCTGCGATTATTTAG	3
AAGATCGGGTTGCGGTTTAAGTTT	2	ACTTAAACCGCAACCCGATCTTAA	4			AATACTTCTGATACCAGTCTCTGA	1	AGAGACTGGTATCAGAAGTATTAC	108
AAGATCGGGTTGCGGTTTAAGTTT	2	ACTTAAACCGCAACCCGATCTTGT	1			ACATGCAAAAAAAGTCTCTTG	1	AGAGACTTTTTTTGCATGTAT	28
AAGATCGGGTTGCGGTTTAAGTTT	2	ACTTAAACCGCAACCCGATCTTAT	1			AGAAACGTGTCTGACTCTCTCTCC	2	AGAGAGAGTCAGACACGTTTCTAG	11
AAGATCCGGTTGCGGTTTAAGTTG	1	ACTTAAACCGCAACCGGATCTTAA	5			AATCCTTATTTTAAATCTCTCTGC	2	AGAGAGATTTAAAATAAGGATTAA	1
AAGATCCGGTTGCGGTTTAAGTTG	1	ACTTAAACCGCAACCGGATCTTAT	1			AAAATCTTCCCGAAATCTCTCTAC	1	AGAGAGATTTCGGGAAGATTTTCA	1
AAGATCCGGTTGCGGTTTAAGTTC	1	ACTTAAACCGCAACCGGATCTTAA	5			AGACTTGAGTTCGATCCTCTCTGG	4	AGAGAGGATCGAACTCAAGTCTGA	3
AAGATCCGGTTGCGGTTTAAGTTC	1	ACTTAAACCGCAACCGGATCTTAT	1			AAGTTCCTAGATCATCCTCTCTTC	1	AGAGAGGATGATCTAGGAACTTGT	1
AAGATCGAGTTGCGGTTTAAGTTG	1	ACTTAAACCGCAACTCGATCTTAA	1			AAGCTGCTCTTTCTGTACTCTCTGG	1	AGAGAGTACAGAAAGAGCAGCTTGA	1
AAGATCCAGTTGCGGTTTAAGTTC	1	ACTTAAACCGCAACTGGATCTTAA	2			ACACGCGGTATGACTACTCTCTGA	1	AGAGAGTAGTCATACCGCGTGTAT	1
AAATGGGTTAACTCACTTAAGTAA	1	ACTTAAGTGAGTTAACCCATTTAA	1			AGAAACTATGAGATACTCTCTAC	3	AGAGAGTATCTCATAGTTTCTCA	2
AAGTAAATAGTACCGTGTAAGTCA	2	ACTTACACGGTACTATTTACTTAA	1			AGAAACTTTATACACTCTCTCT	1	AGAGAGTGTATAAAGTTTCTCA	2
ACTATGTCTGGACCTGGTAAGTTT	2	ACTTACCAGGTCCAGACATAGTAA	26			AGAAACTTTCTATACACTCTCTCC	3	AGAGAGTGTATAGAAAGTTTCTCA	6
AAGATTGGATTGCCGGTAAGTGA	1	ACTTACCGGCAATCCAATCTTCT	1			AATCACATATCGTTTTATCTCTCT	1	AGAGATAAAACGATATGTGATTAG	2
ACAGAACGGAAAACCGTAAGTAC	1	ACTTACGGTTTTCCGTTCTGTTA	1			AAGCAAAAAAGTGTCTATCTCTCT	4	AGAGATAGACACTTTTTTGCTTTT	3
AAAAATAGATAGTCTAAGTCA	6	ACTTAGACTATCTATTTTTTT	1			AATGCTATCAGATTATATCTCTGC	1	AGAGATATAATCTGATAGCATTTA	8
AACCGATCTTAAAAGCCTAAGTAG	1	ACTTAGGCTTTTAAGATCGGTTGC	2			AAGTAGAGTGACTCATATCTCTTA	35	AGAGATATGAGTCACTCTACTTAT	1
AAGGTTAATGGTTTATATAAGTGA	7	ACTTATATAAACCATTAACCTTAA	1			ACGCGAACCGGCGATCTCTAA	1	AGAGATCGCCGGTTCGCGTGA	2
ACAGGAAAGACAGCGGATAAGTTT	7	ACTTATCCGCTGTCTTTCCTGTTA	1			ACTAACGGTTTAGACCATCTCTAA	1	AGAGATGGTCTAAACCGTTAGTAC	2
ACCCCTACATATGATCATAAGTTA	1	ACTTATGATCATATGTAGGGGTGT	5			AATCAGAACTTGAACCATCTCTCT	1	AGAGATGGTTCAAGTTCTGATTAA	5
ACATACACGAACAAACATAAGTCA	1	ACTTATGTTTGTTCGTGTATGTCT	1			ACGGCATCTCCAACACATCTCTAT	25	AGAGATGTGTTGGAGATGCCGTAA	41
AAGCCAGCGATTATAAATAAGTTC	1	ACTTATTTATAATCGCTGGCTTAT	2			AACAAAGACTAACTCAATCTCTTC	1	AGAGATTGAGTTAGTCTTTGTTCG	5
ACGGACGGATAAAATAAGTGG	2	ACTTATTTTATCCGTCCGTTA	1			ACCGCTGCTTATCACAATCTCTGG	1	AGAGATTGTGATAAGCAGCGGTTG	3
ACATGTAGACCGGGGTTGAAGTTT	3	ACTTCAACCCCGGTCTACATGTCC	9			ACACAGATACAACAAAATCTCTAC	1	AGAGATTTTGTTGTATCTGTGTTG	4
AAGCTGGTCATTCGGTTGAAGTGG	2	ACTTCAACCGAATGACCAGCTTTT	1			AAAGCTGAAACTGGTTTGCTCTCT	3	AGAGCAAACCAGTTTCAGCTTTTC	1
AAGAAACGCGTATGACTGAAGTCT	34	ACTTCAGTCATACGCGTTTCTTAT	1			AACTGTCACAGAAATTTGCTCTAC	1	AGAGCAAATTTCTGTGACAGTTGA	3
ACCAAAGCCGACAGATGAAGTTA	1	ACTTCATCTGTCGGCTTTGGTTT	1			AGAAAATGGGACCCGGTGCTCTGG	2	AGAGCACCGGGTCCCATTTTCTAA	3
ACCTCTTTTCGCCGGACGAAGTTG	1	ACTTCGTCCGGCGAAAAGAGGTAG	3			AGAAATTTAACGGTCTGCTCTTT	3	AGAGCAGACCGTTAAATTTCTAA	2
ACCAAAGCCGACGGACGAAGTTA	5	ACTTCGTCCGTCGGCTTTGGTTT	1			AGACTACTGATGGAGATGCTCTAA	8	AGAGCATCTCCATCAGTAGTCTTT	1
ACAGACGATTTAGTTAGAAGTTA	1	ACTTCTAACTAAATCGTCTGTAC	1			AGACTACTGATGGAGATGCTCTTA	3	AGAGCATCTCCATCAGTAGTCTTT	1
AATTGGCAATTAGTGGAGAAGTTC	3	ACTTCTCCACTAATTGCCAATTGA	1			AGACTACTAATGGAGATGCTCTTA	4	AGAGCATCTCCATTAGTAGTCTGT	3
AAAACATGTGAATGAGAGAAGTGG	8	ACTTCTCTCATTCACATGTTTTAT	2			AGACTACTGATGAAGATGCTCTTA	20	AGAGCATCTTCATCAGTAGTCTTT	1
AACATCTTACAATACTTCAAGTAC	1	ACTTGAAGTATTGTAAGATGTTAT	6			AAGACGATACAAGTTGGCTCTTT	1	AGAGCCAACTTGTATCGTCTTCT	1
AAGATTATGCCATGTGTCAAGTCT	1	ACTTGACACATGGCATAATCTTAT	1			AAGGTCGACGCGGGCTCTGC	1	AGAGCCCGCGTCGACCTTTT	1
AAGATTGTGTCACGTGTCAAGTCA	16	ACTTGACACGTGACACAATCTTAT	1			AAAGGTCGACGCGGGCTCTGC	2	AGAGCCCGCGTCGACCTTTTA	5
AAGATTGTGCCACGTGTCAAGTTA	1	ACTTGACACGTGGCACAATCTTAT	1			AATAACAATACCGGGCTCTTT	22	AGAGCCCGGTATTGTTATTTA	5
AAGATCGTGCCACGTGTCAAGTCA	2	ACTTGACACGTGGCACGATCTTAA	1			AATGAGGCGTACGTGAGGCTCTGA	2	AGAGCCTCACGTACGCCTCATTGT	1
AAGAGTTTAGGATGTCAAGTTT	1	ACTTGACATCCTAAACTCTTTA	1			AGACCACACTCTTTTTCGCTCTTT	2	AGAGCGAAAAAGAGTGTGGTCTTA	2
ACCGCAACAGAGACTCTCAAGTTA	2	ACTTGAGAGTCTCTGTTGCGGTGG	2			ACATTTTATCGGTCGCTCTTG	1	AGAGCGACCGATAAAATGTAA	1
ACTAGCTTCCATAATCTCAAGTAG	1	ACTTGAGATTATGGAAGCTAGTGC	3			AACCCTCTTGATTCACCGCTCTGT	1	AGAGCGGTGAATCAAGAGGGTTGT	4
ACCGCAACAGAGACCCTCAAGTTA	1	ACTTGAGGGTCTCTGTTGCGGTGG	2			AAGGAACCGTTACGACGCTCTCA	1	AGAGCGTCGTAACGGTTCCTTGT	1
AACGACTAAATAACCCTCAAGTTA	3	ACTTGAGGGTTATTTAGTCGTTGT	1			AGAGATACCGGAGAGAAGCTCTAA	1	AGAGCTTCTCTCCGGTATCTCTAA	2
ACGGCGAATGGTTCATCAAGTCT	2	ACTTGATGAACCATTCGCCGTGG	1			AAGTCTACGTGGCAAGCTCTCA	1	AGAGCTTGCCACGTAGACTTCA	2
AAAAGCGGGCCACTCATCAAGTGT	1	ACTTGATGAGTGGCCCGCTTTTAT	2			AGAGATTTCTATTTTTTCCTCTAA	1	AGAGGAAAAAATAGAAATCTCTAT	2
AATCATACACATGCCATCAAGTCA	1	ACTTGATGGCATGTGTATGATTGA	1			AAGCAAGCTTTCTTCTTCCTCTTT	1	AGAGGAAGAAGAAAGCTTGCTTAG	5
AATCATACACATCACATCAAGTCA	1	ACTTGATGTGATGTGTATGATTGA	6			AAACAAGCTTTCTTCTTCCTCTTT	1	AGAGGAAGAAGAAAGCTTGTTTAG	2
AAAGCAAATCACAAAATCAAGTAT	1	ACTTGATTTTGTGATTTGCTTTGC	7			ACAGAAAATAAGTTTGTCCTCTAC	1	AGAGGACAAACTTATTTTCTGTAA	20
AAGTAATTCGCAAGTAGCAAGTAA	4	ACTTGCTACTTGCGAATTACTTAC	1			AAACAAACCGGCAAACTCCTCTAT	1	AGAGGAGTTTGCCGGTTTGTTTGA	1
AAAAGGTATCACATGCCAAGTTT	3	ACTTGGCATGTGATACCTTTTCA	17			ACCCCAACACTTTTTGCCTCTTA	1	AGAGGCAAAAAGTGTTGGGGTAA	1
AAAAGGTATCACATGCCAAGTTT	3	ACTTGGCATGTGATACCTTTTTG	2			AAAGTTTTGAAATATTGCCTCTAC	1	AGAGGCAATATTTCAAAACTTTGG	20
AAAAGGTATCACATGCCAAGTTT	3	ACTTGGCATGTGATACCTTTTCG	1			ACTGTTTTCAAGTATCGCCTCTGT	1	AGAGGCGATACTTGAAAACAGTTT	23
AATAAACCGCTGCGGACCAAGTTT	1	ACTTGGTCCGCAGCGGTTTATTGT	10			AGAAGATGCAGAATGTCCCTCTAA	1	AGAGGGACATTCTGCATCTTCTTC	2
AATAAACCGCTGCAGACCAAGTTT	1	ACTTGGTCTGCAGCGGTTTATTGT	36			AAGTAGCTCTGACCCCTCTCA	1	AGAGGGGTCAGAGCTACTTGC	7
AACGATCAGATGTTTACAAGTTA	1	ACTTGTAAACATCTGATCGTTTG	4			AACAGATTTAAGTAATACCTCTTT	1	AGAGGTATTACTTAAATCTGTTGC	2
AAACGATCAGATGTTTACAAGTTA	3	ACTTGTAAACATCTGATCGTTTGA	36			AATCTTGAACCCTACACCTCTTA	7	AGAGGTGTAGGGTTCAAGATTTT	1
AATCCACCGTTTCAATACAAGTTA	1	ACTTGTATTGAAACGGTGGATTGA	1			AAATCTTGAACCCTACACCTCTTA	1	AGAGGTGTAGGGTTCAAGATTTTG	2
AAGTGCCTCATCCCTGACAAGTGC	1	ACTTGTCAGGGATGAGGCACTTTT	169			ACTCGAACCGGCAACCTCTAA	2	AGAGGTTGCCGGTTCGAGTGA	1
AAAAGAGAAGAACATGACAAGTAA	7	ACTTGTCATGTTCTTCTCTTTTAT	1			ACCCTACTCTATAATTTACTCTAA	1	AGAGTAAATTATAGAGTAGGGTTG	1
AAGATGCGAAAAATGACAAGTTG	1	ACTTGTCATTTTTCGCATCTTAA	1			ACAGAATGACCGAATTACTCTCA	1	AGAGTAATTCGGTCATTCTGTTC	2
AAGTGAACCGTTTGGACAAGTTT	1	ACTTGTCCAAACGGTTCACTTTT	1			AACAGAATGACCGAATTACTCTCA	13	AGAGTAATTCGGTCATTCTGTTCA	2
AATTATTAGTGATCCCACAAGTCA	1	ACTTGTGGGATCACTAATAATTAG	1			AACAGAATGACCAAATTACTCTCA	73	AGAGTAATTTGGTCATTCTGTTCA	1
AACAACAACGACACACACAAGTAA	5	ACTTGTGTGTGTCGTTGTTGTTGC	2			AACAGAATGACCAAATTACTCTTA	12	AGAGTAATTTGGTCATTCTGTTCA	1
AAATGGCGCGGTCAACACAAGTTT	2	ACTTGTGTTGACCGCGCCATTTTA	1			ACTACAATCAGAATGGTACTCTAA	1	AGAGTACCATTCTGATTGTAGTAG	4
ACTGAACGTTTTTACAACAAGTGC	1	ACTTGTTGTAAAAACGTTCAGTTC	1			AACTTTCTCCAGAACCTACTCTTT	2	AGAGTAGGTTCTGGAGAAAGTTAT	1
AATCATACACATGACAACAAGTCA	1	ACTTGTTGTCATGTGTATGATTGA	1			AATAAAGAAAAGCACATACTCTAG	5	AGAGTATGTGCTTTTCTTTATTAT	1
ACATAACGATCTGAAAACAAGTTG	2	ACTTGTTTTCAGATCGTTATGTGA	4			AAGAATTTTGCATTTTGACTCTAA	1	AGAGTCAAAATGCAAAATTCTTCT	1
AAGTGCCTTCTCCATTTAAAGTGC	1	ACTTTAAATGGAGAAGGCACTTTA	4			AAATTCTCTATCGCGTGACTCTTT	1	AGAGTCACGCGATAGAGAATTTGG	2
ACATGTAGACCGGAGTTAAAGTTT	4	ACTTTAACTCCGGTCTACATGTCC	2			AATTTTGCATAAAGCGGACTCTAT	3	AGAGTCCGCTTTATGCAAAATTCA	1
ACGATCGCCTTCTCAGTAAAGTCA	1	ACTTTACTGAGAAGGCGATCGTAG	3			AAACTGCCTCTTCTCCGACTCTAA	1	AGAGTCGGAGAAGAGGCAGTTTGT	2
AAGAAGAAGTCCACTATAAAGTAT	2	ACTTTATAGTGGACTTCTTCTTAA	2			AAGATGAAGAAGACCCGACTCTGT	3	AGAGTCGGGTCTTCTTCATCTTTC	1
AACCAGTCCCGTGAGATAAAGTCA	1	ACTTTATCTCACGGGACTGGTTAG	2			AGACGACTCGATAATTCACTCTCT	2	AGAGTGAATTATCGAGTCGTCTGA	3
ACAGAAACTTAGAACCGAAAGTAC	3	ACTTTCGGTTCTAAGTTTCTGTAC	1			AAGAACGCCTCACTTTAACTCTTA	1	AGAGTTAAAGTGAGGCGTTCTTAT	1
AACGACAGTATTCTCCAGAAAGTGA	2	ACTTTCTGGAGAATACTGTCGTTGA	1			AACCAGAAACGTCTCTAACTCTTT	1	AGAGTTAGAGACGTTTCTGGTTTG	1
AATACAATCTTCTCTTCAAAGTTA	1	ACTTTGAAGAGAAGATTGTATTGG	19			AAGGTAATGACATAATAACTCTAA	5	AGAGTTATTATGTCATTACCTTAT	1
AATACAATCTTCTCTTCAAAGTTA	1	ACTTTGAAGAGAAGATTGTATTTG	1			AATGTGGTAGATGCAACTCTTT	75	AGAGTTGCATCTACCACATTCA	2
AAGTGCCTACTCCCTCCAAAGTGC	1	ACTTTGGAGGGAGTAGGCACTTTT	14			ACCCGATTGAGAAAACAACTCTAT	1	AGAGTTGTTTTCTCAATCGGGTCC	2
ACCCGGGTCTGTCGGCCAAAGTGT	4	ACTTTGGCCGACAGACCCGGGTAA	1			AAAGCATAAACCATAAACTCTTA	6	AGAGTTTATGGTTTATGCTTTGA	1
AACAAACTGGTAAACAAAGTGA	22	ACTTTGTTTACCAGTTTGTTCT	1			ACCATTCTTAAACTCAAACTCTAA	1	AGAGTTTGAGTTTAAGAATGGTTT	2
ACCGCGGGACGATTTTAAAAGTAA	1	ACTTTTAAAATCGTCCCGCGGTAT	7			AGACGATTTAAATACAAACTCTAA	6	AGAGTTTGTATTTAAATCGTCTGA	1
ACCGCAGGACGATTTTAAAAGTAA	2	ACTTTTAAAATCGTCCTGCGGTAT	22			AAATTTCTTTACCTAAAACTCTAA	1	AGAGTTTTAGGTAAAGAAATTTGG	1
AAGTCGGCAGACAACTAAAAGTCC	3	ACTTTTAGTTGTCTGCCGACTTGA	1			AAGAAAACCCTTTAAAAACTCTTG	6	AGAGTTTTTAAAGGGTTTTCTTAT	1
AAGTGCCTCATCCCTGAAAAGTGC	3	ACTTTTCAGGGATGAGGCACTTTT	14			AAGAAAACCCTTTAAAAACTCTTA	2	AGAGTTTTTAAAGGGTTTTCTTAT	1
AAGTGCCTCATCCCTGAAAAGTGC	3	ACTTTTCAGGGATGAGGCACTTTG	1			AAAAGTTCACCGGTTTTTATCTTC	1	AGATAAAAACCGGTGAACTTTTGA	1
AAACCCAAACATTATGAAAAGTTA	1	ACTTTTCATAATGTTTGGGTTTAG	1			AGAAGTTGTAGGCGTTTTATCTAG	1	AGATAAAACGCCTACAACTTCTCT	2
AAACGACATATCATGAAAAGTAA	1	ACTTTTCATGATATGTCGTTTTA	3			AGAAGTGTGGCAATTTTATCTGA	1	AGATAAAATTGCCACACTTCTGA	2
AAAACGACATATCATGAAAAGTAA	1	ACTTTTCATGATATGTCGTTTTAC	1			AAATAAGTAAATGTTTATCTAC	1	AGATAAACATTTACTTATTTAC	1
AAGTGCCTCATCCTCGAAAAGTGC	1	ACTTTTCGAGGATGAGGCACTTTC	2			AAACCGCGGGGACAATTTATCTTT	5	AGATAAATTGTCCCCGCGGTTTAC	6
ACAAAGAACAGAAAAGAAAAGTGG	1	ACTTTTCTTTTCTGTTCTTTGTGG	2			AGAATCCTTGACAATGTTATCTTT	2	AGATAACATTGTCAAGGATTCTAG	1
AATTTCTCCCTAAACCAAAAGTTC	1	ACTTTTGGTTTAGGGAGAAATTGG	1			AAACGGGGCAGAGAAGTTATCTAA	5	AGATAACTTCTCTGCCCCGTTTGT	1
ACAAAGTGGATTTTTTTCTTA	2	AGAAAAAAATCCACTTTGTAA	1			AACACAAGGGAAGAGCTTATCTAG	2	AGATAAGCTCTTCCCTTGTGTTAT	2
AAGCAAGAGAGGCCGTTTTTCTAA	2	AGAAAAACGGCCTCTCTTGCTTAG	1			AATAGTATTTGACCCATTATCTCT	1	AGATAATGGGTCAAATACTATTTT	1
ACAACCAAGATGTAGTTTTTCTTA	1	AGAAAAACTACATCTTGGTTGTCG	5			AAGTAAGAGTTTTTCAGTATCTGT	4	AGATACTGAAAAACTCTTACTTGC	2
ACTCAATCAACGTCATTTTTCTTA	2	AGAAAAATGACGTTGATTGAGTAA	1			AAAGCAAAAAAAGTATCTATCTCT	2	AGATAGATACTTTTTTTGCTTTTG	1
ACACTATGTTTGATTGTTTTCTAA	10	AGAAAACAATCAAACATAGTGTAG	6			AAGGCTCTTGTCGTCGCTATCTGT	3	AGATAGCGACGACAAGAGCCTTGA	1
AAATGGTCCGCTGCGGTTTTCTTC	2	AGAAAACCGCAGCGGACCATTTGC	10			AAAGAACCCATGTAGACTATCTAT	2	AGATAGTCTACATGGGTTCTTTGG	1
AAATGATCCGCTGCGGTTTTCTTC	2	AGAAAACCGCAGCGGATCATTTGC	2			AATGAAAATGCTCTAACTATCTTT	1	AGATAGTTAGAGCATTTTCATTGG	8
ACGCTTAACTGTAGAGTTTTCTCA	1	AGAAAACTCTACAGTTAAGCGTGC	1			AATGAGTCGTTCATGTATATCTAT	1	AGATATACATGAACGACTCATTAA	1
AACAACCGAGTGGAAGTTTTCTGA	8	AGAAAACTTCCACTCGGTTGTTTA	1			AGAGCATCCCCAGCGTATATCTTA	21	AGATATACGCTGGGGATGCTCTAA	4
ACGTTATATACCCAACTTTTCTGG	1	AGAAAAGTTGGGTATATAACGTTT	9			AATACACACTTATTATATATCTAC	2	AGATATATAATAAGTGTGTATTAG	1
ACCCTGAGACGATTTATTTTCTAA	1	AGAAAATAAATCGTCTCAGGGTGT	7			ACGGATAACTATGCATATATCTAT	3	AGATATATGCATAGTTATCCGTAA	1
AAACGTTTTATTATTTTCTCG	1	AGAAAATAATAAAACGTTTAG	3			AGAAAACGTAGCGCTGATATCTTT	2	AGATATCAGCGCTACGTTTTCTAA	2
ACAACACTTATACCTATTTTCTCC	1	AGAAAATAGGTATAAGTGTTGTCT	1			AGAATGCTGAGTTGGATATCTTA	1	AGATATCCAACTCAGCATTCTCA	1
AATTTCTGACCATATTTTCTAT	1	AGAAAATATGGTCAGAAATTCA	1			AAGTATGTTTTCGGGGATATCTAA	9	AGATATCCCCGAAAACATACTTAT	1
ACAACACTTACACTCATTTTCTCC	1	AGAAAATGAGTGTAAGTGTTGTCT	1			AAACGGTTGGTCAACGATATCTTT	3	AGATATCGTTGACCAACCGTTTAA	1
AACCGAATGGCCGGCATTTTCTGT	25	AGAAAATGCCGGCCATTCGGTTGG	1			AAACGGTTGGTCAACGATATCTTC	2	AGATATCGTTGACCAACCGTTTAA	1
ACAATGCATTGGCCCATTTTCTCT	1	AGAAAATGGGCCAATGCATTGTGA	1			AGAGGAAAAAATAGAGATATCTAC	2	AGATATCTCTATTTTTTCCTCTAT	1
ACAACACTTATACCCATTTTCTCC	1	AGAAAATGGGTATAAGTGTTGTCT	5			AGACTTAATTTATCATATCTTC	5	AGATATGATAAATTAAGTCTAG	1
AACTTAGTAGTAACGTGTTTCTAG	1	AGAAACACGTTACTACTAAGTTTT	2			AAAACTGTAGTAAGCCATATCTTT	1	AGATATGGCTTACTACAGTTTTTG	1
AAATAGCTTTGTTAGTGTTTCTAT	1	AGAAACACTAACAAAGCTATTTAG	1			AAGCCTGACGCTTTTAATATCTTG	1	AGATATTAAAAGCGTCAGGCTTAA	2
AATATTATATGTTGTGGTTTCTGA	7	AGAAACCACAACATATAATATTAG	1			AAGTGGAATCCGTAAATATCTTA	2	AGATATTTACGGATTCCACTTTT	1
AATAGTCTCTCACATGGTTTCTCT	1	AGAAACCATGTGAGAGACTATTGA	1			AATTTTGTTGGTTTATGGATCTAG	4	AGATCCATAAACCAACAAAATTGA	1
AATTAGTAGATCTAGGGTTTCTTA	4	AGAAACCCTAGATCTACTAATTAC	2			AACGATGTACAATTATGGATCTAA	1	AGATCCATAATTGTACATCGTTGT	1
AAAGCGGTATCTAGCGGTTTCTAT	7	AGAAACCGCTAGATACCGCTTTGG	3			AAAAGAGTAAGATGGATCTTG	7	AGATCCATCTTACTCTTTTGC	1
AAAACGGTATCTAGCGGTTTCTAT	3	AGAAACCGCTAGATACCGTTTTGG	1			AGAAGCTTAGAAATGGATCTGA	507	AGATCCATTTCTAAGCTTCTTC	1
AAAGCGATATCTAGCGGTTTCTAT	4	AGAAACCGCTAGATATCGCTTTGG	4			AAAACGGTTACCGTCGGATCTAT	6	AGATCCGACGGTAACCGTTTTTA	1
AAAGCGATATCTAGCGGTTTCTAT	4	AGAAACCGCTAGATATCGCTTTAA	1			AAAAACGGTTACCGTCGGATCTAT	116	AGATCCGACGGTAACCGTTTTTAT	4
AAAGCGATATCTAGCGGTTTCTAT	4	AGAAACCGCTAGATATCGCTTTGT	1			AAACGTAACATTTCTCGGATCTAA	1	AGATCCGAGAAATGTTACGTTTAA	1
ACGGATCAGTAGAAAGGTTTCTGA	1	AGAAACCTTTCTACTGATCCGTAT	1			ACTTAAACTGCAACCGGATCTTA	1	AGATCCGGTTGCAGTTTAAGTTC	1
AATGGAGATGCTCTTAGTTTCTTT	2	AGAAACTAAGAGCATCTCCATTGG	5			AACTTAAACTGCAACCGGATCTTA	3	AGATCCGGTTGCAGTTTAAGTTCT	4
ACTTTTTCTCTGCTAGTTTCTTA	2	AGAAACTAGCAGAGAAAAAGTTT	1			AACTTAAACCGCAACCGGATCTTA	1	AGATCCGGTTGCGGTTTAAGTTCT	1
ACAGATACAGTATGAGTTTCTCA	5	AGAAACTCATACTGTATCTGTGC	2			ACTTAAACCGCAACCCGATCTTA	6	AGATCGGGTTGCGGTTTAAGTTG	6
ACCGTATAGGTGATCAGTTTCTAA	1	AGAAACTGATCACCTATACGGTTG	1			ACTTAAACCGCAACCCGATCTTA	6	AGATCGGGTTGCGGTTTAAGTTC	6
AAAAAGAGTGTAGAAAGTTTCTCA	1	AGAAACTTTCTACACTCTTTTTCC	1			AACTTAAACCGCAACCCGATCTTG	1	AGATCGGGTTGCGGTTTAAGTTGT	52
ACTTTTCTATACGGCTCTTTCTAA	3	AGAAAGAGCCGTATAGAAAAGTTG	1			AACTTAAACCGCAACCCGATCTTG	1	AGATCGGGTTGCGGTTTAAGTTCT	19
ACGATAGACGACACCTCTTTCTTC	1	AGAAAGAGGTGTCGTCTATCGTGG	9			AACTTAAACCGCAACCCGATCTTG	1	AGATCGGGTTGCGGTTTAAGTTCC	1
AACTTGAACCATCACTCTTTCTAC	3	AGAAAGAGTGATGGTTCAAGTTCT	1			AAATTGTGCGAATTTCAGATCTTT	1	AGATCTGAAATTCGCACAATTTAA	1
ACTCGACAGTTCCGTCCTTTCTTA	1	AGAAAGGACGGAACTGTCGAGTAA	15			AAGCGCCTTATGTCTCAGATCTAA	5	AGATCTGAGACATAAGGCGCTTAA	2
AAAGCAGATTTGGGCCCTTTCTCA	1	AGAAAGGGCCCAAATCTGCTTTGC	1			AGACACCATCTCCACCAGATCTGA	2	AGATCTGGTGGAGATGGTGTCTTT	3
ACAGACGGCCTGAGTACTTTCTGC	3	AGAAAGTACTCAGGCCGTCTGTAT	9			AACTTAAACCGCAACCAGATCTTA	1	AGATCTGGTTGCGGTTTAAGTTCT	1
AAACCCAACTGACAGACTTTCTAA	3	AGAAAGTCTGTCAGTTGGGTTTTG	20			AACAAAGAAGAAAAACAGATCTGC	9	AGATCTGTTTTTCTTCTTTGTTGT	11
AAGCCCAAAAGAGAGATTTCTTG	1	AGAAATCTCTCTTTTGGGCTTAA	1			ACTACCGACTCTAAGAAGATCTAG	7	AGATCTTCTTAGAGTCGGTAGTTT	38
AAAGGTTATATAAGTCATTTCTAA	1	AGAAATGACTTATATAACCTTTTG	1			AGAGTTTTCACGCATTTCATCTTA	1	AGATGAAATGCGTGAAAACTCTAA	1
AATCAGGTCGTCTGCATTTCTGA	1	AGAAATGCAGACGACCTGATTAC	4			AATCCCGTCGCTGTCATCTTC	2	AGATGACAGCGACGGGATTGA	99
AAACAAACAATGCAACATTTCTTA	4	AGAAATGTTGCATTGTTTGTTTGA	1			ACCGTGCGCGGGGACTCATCTAA	1	AGATGAGTCCCCGCGCACGGTAA	3
AATAGGATTAACACGAATTTCTTA	1	AGAAATTCGTGTTAATCCTATTAA	2			ACAAGAGTCGAATGAATCATCTAG	3	AGATGATTCATTCGACTCTTGTTC	1
AAAACGGTATCTAGCAATTTCTAT	1	AGAAATTGCTAGATACCGTTTTGG	1			AAGCGGAAAGCTAAAATCATCTAT	19	AGATGATTTTAGCTTTCCGCTTAG	1
AAGAGCAGACCGTTAAATTTCTAA	18	AGAAATTTAACGGTCTGCTCTTTT	40			AGAAAAAAAAAGAGTTGCATCTAC	14	AGATGCAACTCTTTTTTTTTCTTT	1
AAGACTGTATCCTAAATTTCTAA	3	AGAAATTTAGGATACAGTCTTTA	1			AGAATAAAACTCAATTGCATCTTA	3	AGATGCAATTGAGTTTTATTCTGA	16
AAAGACTGTATCCTAAATTTCTAA	22	AGAAATTTAGGATACAGTCTTTAT	14			AAGCCAGTCTCACCTTCCATCTTC	1	AGATGGAAGGTGAGACTGGCTTAA	3
AAATAAGGCGTCAGAAATTTCTCA	2	AGAAATTTCTGACGCCTTATTTGT	1			AATCCATTCAACATGTCCATCTGG	1	AGATGGACATGTTGAATGGATTAG	2
AAAGCTTAACCTAAAAATTTCTGA	2	AGAAATTTTTAGGTTAAGCTTTAG	1			ACATCATTTTTCATCTCCATCTAG	2	AGATGGAGATGAAAAATGATGTTT	23
ACGGGGAAGAGAAAAAATTTCTCT	1	AGAAATTTTTTCTCTTCCCCGTGG	1			ACATCAGTTTTCATCTCCATCTAG	2	AGATGGAGATGAAAACTGATGTTT	14
ACTTTGTTTACCAGTTTGTTCTCC	1	AGAACAAACTGGTAAACAAAGTGA	61			AATCAGATTATTTAGGCCATCTCC	1	AGATGGCCTAAATAATCTGATTAT	1
AAGGGGAGACAATCTGTGTTCTGG	9	AGAACACAGATTGTCTCCCCTTCA	1			AAACCCGTCCTACCATCTAA	1	AGATGGTAGGACGGGTTTGG	2
ACCGTTTCGGTGATGTGTTCTTA	1	AGAACACATCACCGAAACGGTTA	1			AAACCCGTCCTACCATCTAA	1	AGATGGTAGGACGGGTTTGA	1
ACCGTATCGGTGATGTGTTCTTA	46	AGAACACATCACCGATACGGTTA	22			ACTCAAACCCGTCCTACCATCTAA	1	AGATGGTAGGACGGGTTTGAGTGA	3
ACCGTATCAGTGATGTGTTCTTA	19	AGAACACATCACTGATACGGTTA	40			ACTCAAACCCGTCCTACCATCTAA	1	AGATGGTAGGACGGGTTTGAGTCG	1
AAAAAAAGTTCTGTCGTGTTCTAG	1	AGAACACGACAGAACTTTTTTTAA	46			AAAACTCGTCATACCATCTAA	1	AGATGGTATGACGAGTTTTGA	1
AAAAAAAGTTCTGTCGTGTTCTGG	1	AGAACACGACAGAACTTTTTTTAA	46			AGAAAACCGCAACGGACCATCTGC	11	AGATGGTCCGTTGCGGTTTTCTTC	6
AACAGTAGAAGCCAGCTGTTCTCC	14	AGAACAGCTGGCTTCTACTGTTAT	2			AGAAAACCGCAACGGACCATCTAC	6	AGATGGTCCGTTGCGGTTTTCTTC	6
ACCGTATCGGTGATATGTTCTTA	6	AGAACATATCACCGATACGGTTA	7			AAAGTAGAGTATGAGACCATCTAC	1	AGATGGTCTCATACTCTACTTTGT	8
AACCGTATCGGTGATATGTTCTTA	1	AGAACATATCACCGATACGGTTAC	9			AAAAGTTGTTATGTCACCATCTTC	1	AGATGGTGACATAACAACTTTTGG	31
AAACCGTAACGAAGATGTTCTTG	1	AGAACATCTTCGTTACGGTTTGC	1			AAAAGCTGTTATGTCACCATCTTC	3	AGATGGTGACATAACAGCTTTTGC	1
ACTTAGGGAGAAAGCGGGTTCTAA	9	AGAACCCGCTTTCTCCCTAAGTGT	1			AAAAGCTGTTATGTCACCATCTTC	3	AGATGGTGACATAACAGCTTTTGG	1
ACTGAGAGAGAAAGAGGGTTCTAA	5	AGAACCCTCTTTCTCTCTCAGTGT	1			ACCTGCTTTACTTTCTACATCTCC	1	AGATGTAGAAAGTAAAGCAGGTTG	8
AATGTATGATACGGTCGGTTCTTA	2	AGAACCGACCGTATCATACATTGA	2			AAAAATTTAAGCCCATACATCTAC	1	AGATGTATGGGCTTAAATTTTTAT	7
AAGGCTTGGCTCAGGCGGTTCTTG	1	AGAACCGCCTGAGCCAAGCCTTCG	1			ACTCCTTCATATTTCGACATCTCT	1	AGATGTCGAAATATGAAGGAGTGG	9
AAGAATCTAGCCAGATCGTTCTTA	1	AGAACGATCTGGCTAGATTCTTGG	1			AAACGATAAATCAAAGACATCTTA	1	AGATGTCTTTGATTTATCGTTTGG	2
AACATCCTTCTAAACCCGTTCTGC	1	AGAACGGGTTTAGAAGGATGTTAC	1			AGACCATCCACATTGCACATCTGA	2	AGATGTGCAATGTGGATGGTCTAA	18
AAACCGGCGGAATTGACGTTCTTA	4	AGAACGTCAATTCCGCCGGTTTGA	1			AATGACACATGTAAACATCTCA	1	AGATGTTTACATGTGTCATTCA	1
AAAAAATTCAGGTATCAGTTCTAA	2	AGAACTGATACCTGAATTTTTTGG	3			AAAGAGACGGGGATTTTAATCTTC	1	AGATTAAAATCCCCGTCTCTTTAG	1
AAAGTTATAGAGCAGTTCTGG	1	AGAACTGCTCTATAACTTTCA	1			ACAGACATCGTGATATTAATCTGC	1	AGATTAATATCACGATGTCTGTAC	8
AATCTCACAGGTAGAAGTTCTGG	1	AGAACTTCTACCTGTGAGATTTA	3			ACAGACATCGTGATGGTAATCTGC	1	AGATTACCATCACGATGTCTGTAC	10
AAATCTCACAGGTAGAAGTTCTGG	6	AGAACTTCTACCTGTGAGATTTAT	1			AGAGTAGGCGGCTAGTAATCTAG	1	AGATTACTAGCCGCCTACTCTTC	1
AATGAGTGATGGTTCAAGTTCTGA	3	AGAACTTGAACCATCACTCATTCT	1			AAGAGTAGGCGGCTAGTAATCTAG	6	AGATTACTAGCCGCCTACTCTTCT	9
AAAGCAAAGTAATAAAAGTTCTAT	2	AGAACTTTTATTACTTTGCTTTAA	2			ACAGACATCGTGATAGTAATCTGA	1	AGATTACTATCACGATGTCTGTAC	11
ACGACAGACGACATCTTCTTCTCC	8	AGAAGAAGATGTCGTCTGTCGTGG	29			AGATCCGTTCGAATGATAATCTGG	2	AGATTATCATTCGAACGGATCTGT	2
AAACACTAACCAAGCTTCTTCTAG	1	AGAAGAAGCTTGGTTAGTGTTTTA	1			AATCCCTGTAAGCGCATAATCTAT	1	AGATTATGCGCTTACAGGGATTCT	1
AAACACTAACCAACCTTCTTCTAG	1	AGAAGAAGGTTGGTTAGTGTTTTG	8			AAGCTTCTGGGTCATGGAATCTCT	1	AGATTCCATGACCCAGAAGCTTAT	2
AAACACTAACCAACCTTCTTCTAG	1	AGAAGAAGGTTGGTTAGTGTTTTA	2			AATTAGGTCAATGGAATCTGC	1	AGATTCCATTGACCTAATTCT	1
AAACACTAACCAACCTTCTTCTAG	1	AGAAGAAGGTTGGTTAGTGTTTCG	1			AAGTAGCTGATGTAGGGAATCTAG	52	AGATTCCCTACATCAGCTACTTCT	2
AAACACTAACCAACCTTCTTCTAG	1	AGAAGAAGGTTGGTTAGTGTTTTC	1			ACCATCTTTGAGTGCAGAATCTCC	1	AGATTCTGCACTCAAAGATGGTTC	5
AAACACTAACCAACCTTCTTCTAG	1	AGAAGAAGGTTGGTTAGTGTTTAG	1			ACCATCTCTGAGTGCAGAATCTCC	1	AGATTCTGCACTCAGAGATGGTTC	3
AATAATTGCGTCTGATTCTTCTAG	4	AGAAGAATCAGACGCAATTATTGA	5			AAAGTGCCATGCAGAATCTGT	2	AGATTCTGCATGGCACTTTGA	11
ACGACAGACGACACATTCTTCTCA	5	AGAAGAATGTGTCGTCTGTCGTGG	88			ACCGTCTCTAAGAGCAGAATCTCC	1	AGATTCTGCTCTTAGAGACGGTTC	1
AAGAGTTTTTAAAGGGTCTTCTTG	1	AGAAGACCCTTTAAAAACTCTTGT	144			AGAAATATGGTTCTGTCAATCTGC	1	AGATTGACAGAACCATATTTCTTG	9
AAGAGTTTTTAAAGGGTCTTCTTG	1	AGAAGACCCTTTAAAAACTCTTTT	2			ACCGGAATACTATATACAATCTAA	2	AGATTGTATATAGTATTCCGGTTT	1
ACAGTGGTAACTAAGTCTTCTTT	1	AGAAGACTTAGTTACCACTGTTT	40			AAAACGAGCAGAACAATCTGG	5	AGATTGTTCTGCTCGTTTTAT	1
ACCAGCACGGAGACTCTCTTCTTT	1	AGAAGAGAGTCTCCGTGCTGGTAA	1			AAAAGAACGAACTAAACAATCTGT	2	AGATTGTTTAGTTCGTTCTTTTCG	1
AACGCGGTAGAGTATCTCTTCTAA	2	AGAAGAGATACTCTACCGCGTTCC	16			AAACGGTCCAGATTAAATCTAA	1	AGATTTAATCTGGACCGTTTAA	2
ACGACAGACGATACCTCTTCTCA	2	AGAAGAGGTATCGTCTGTCGTGG	2			AGAAAGCAGAACTTCAAATCTAA	1	AGATTTGAAGTTCTGCTTTCTCA	3
AACCTCATACAATAACTCTTCTAG	1	AGAAGAGTTATTGTATGAGGTTTA	5			AAGAGAACTAAATAACAAATCTTC	1	AGATTTGTTATTTAGTTCTCTTTC	1
ACTCAGCAGTTCCTATCTTCTTT	1	AGAAGATAGGAACTGCTGAGTGA	5			ACCAAAAACTCTTACAAAATCTAC	1	AGATTTTGTAAGAGTTTTTGGTTT	3
ACTCAGCAGTTCCTATCTTCTTT	1	AGAAGATAGGAACTGCTGAGTAA	1			AGAGAAATCACGAAAAATCTTA	1	AGATTTTTCGTGATTTCTCTCA	1
ACGGATAGCTTTTAGATCTTCTCA	1	AGAAGATCTAAAAGCTATCCGTAA	2			AAACAACACCAGTAGTTTTGCTTG	1	AGCAAAACTACTGGTGTTGTTTTG	1
AATCCCGTCGCTGTCATCTTCTTT	1	AGAAGATGACAGCGACGGGATTGA	94			AAAAGTTGTTCGTTTGCTTG	1	AGCAAACGAACAACTTTTGA	1
ACGACAGACGACATCTTCTTC	1	AGAAGATGTCGTCTGTCGTGG	1			AGAACTGTTTTTCTTCTTTGCTAT	2	AGCAAAGAAGAAAAACAGTTCTAC	1
ACCGGCAATCCAATCTTCTCT	1	AGAAGATTGGATTGCCGGTAA	1			ACAGAGAGAATCAAGCTTTGCTAG	1	AGCAAAGCTTGATTCTCTCTGTAA	2
AATTTGGTCTTAACAATCTTCTAA	1	AGAAGATTGTTAAGACCAAATTAC	228			ACAGATTGTACCGGGATTTGCTAA	2	AGCAAATCCCGGTACAATCTGTCA	1
AAACAAAATGCATAAATCTTCTAA	1	AGAAGATTTATGCATTTTGTTTGT	10			AGAATTAACATGCGGATTTGCTCT	2	AGCAAATCCGCATGTTAATTCTCT	1
AGAAAACAGAACCAAATCTTCTCC	1	AGAAGATTTGGTTCTGTTTTCTTT	53			AGATTTGTTTTCTGATGTTGCTTT	8	AGCAACATCAGAAAACAAATCTAA	1
AACCAACCTTCTTCTTGCTTCTTA	1	AGAAGCAAGAAGAAGGTTGGTTAG	1			AAGGAGAAGAACAAAGTTGCTTG	17	AGCAACTTTGTTCTTCTCCTTTG	1
ACAAAATAAGGAATGCTTCTGA	3	AGAAGCATTCCTTATTTTGTTC	7			AAAGTGTCTTGGTGATCTTGCTCG	1	AGCAAGATCACCAAGACACTTTAA	2
AACAAAATAAGGAATGCTTCTGA	1	AGAAGCATTCCTTATTTTGTTCC	1			AATCAAGTTCCACCGCATTGCTGA	1	AGCAATGCGGTGGAACTTGATTTG	1
ACGACAGACGACACTTCCTTCTTA	1	AGAAGGAAGTGTCGTCTGTCGTGG	7			AGATTTATTTCACAAAATTGCTGC	1	AGCAATTTTGTGAAATAAATCTTA	1
ACGACAGACGACACTTCCTTCTCC	1	AGAAGGAAGTGTCGTCTGTCGTGG	7			AGAAGCTGTCCAAATCTGTGCTAA	1	AGCACAGATTTGGACAGCTTCTAC	3
AAGCGGAAACTCCCGTCCTTCTTC	2	AGAAGGACGGGAGTTTCCGCTTAT	1			AAATCTCCTAGGTAGATGTGCTGA	1	AGCACATCTACCTAGGAGATTTAC	1
ACGACAGACGACACCTCCTTCTTC	1	AGAAGGAGGTGTCGTCTGTCGTGG	23			AATTCTGTGTAGATATGGTGCTAT	2	AGCACCATATCTACACAGAATTCG	1
AAATTGTCCAATTTGCCCTTCTAA	1	AGAAGGGCAAATTGGACAATTTGG	13			AGAGTCCAGCGTTGGGGGTGCTCT	2	AGCACCCCCAACGCTGGACTCTAT	2
AAATTGTCCAATTTGCCCTTCTAA	1	AGAAGGGCAAATTGGACAATTTAG	2			AAATATTCTTAATCTGCGTGCTTT	1	AGCACGCAGATTAAGAATATTTAC	15
AAAATACTTAATCCTACCTTCTAA	2	AGAAGGTAGGATTAAGTATTTTGA	9			AAATATTCTTAATCTGCGTGCTTT	1	AGCACGCAGATTAAGAATATTTAT	3
AAATCTTTTTTCGTCCACTTCTGT	2	AGAAGTGGACGAAAAAAGATTTGC	9			AAAACAGGCTCCGCGTGCTTG	1	AGCACGCGGAGCCTGTTTTAA	1
AATAATACAGGACCACACTTCTAA	1	AGAAGTGTGGTCCTGTATTATTAT	17			ACGTTTAAACAATGTCCGTGCTGA	1	AGCACGGACATTGTTTAAACGTGG	2
ACTTTATGACTCTATAACTTCTAT	10	AGAAGTTATAGAGTCATAAAGTTT	65			ACAAAATATTAATGCCCGTGCTAT	1	AGCACGGGCATTAATATTTTGTAT	9
AAGATGCAATTGAGTTTATTCTGA	2	AGAATAAACTCAATTGCATCTTAA	4			ACAAAATATTAATGCCCGTGCTGT	1	AGCACGGGCATTAATATTTTGTAT	9
AAAGTTTCTACCTATTTATTCTCC	3	AGAATAAATAGGTAGAAACTTTGT	2			AGACTAGATCATAACCCGTGCTAT	2	AGCACGGGTTATGATCTAGTCTTA	2
AAAGTTTCTACCTATTTATTCTCA	2	AGAATAAATAGGTAGAAACTTTGT	2			AGAAGATCCCTCTCAACGTGCTTT	2	AGCACGTTGAGAGGGATCTTCTCC	2
AAAGTTTCTACCTATTTATTCTCT	2	AGAATAAATAGGTAGAAACTTTGT	2			ACAGACCAGAAGGAGTGCTGA	20	AGCACTCCTTCTGGTCTGTCC	1
AAAGTTTCTACCTATTTATTCTCG	1	AGAATAAATAGGTAGAAACTTTGT	2			AATGTGATTTCTGCCCAGTGCTCT	3	AGCACTGGGCAGAAATCACATTGC	1
AAGACATAGCCATTATTATTCTAG	1	AGAATAATAATGGCTATGTCTTGT	1			AATCCGTCATTGATCTGCTTA	1	AGCAGATCAATGACGGATTTT	1
AACCTAATGGCCGGTGTATTCTAC	1	AGAATACACCGGCCATTAGGTTAG	2			AATCACGGAGGCAGGATCTGCTAT	2	AGCAGATCCTGCCTCCGTGATTTA	6
AAACTCTCCCAGACGCTATTCTCG	2	AGAATAGCGTCTGGGAGAGTTTCA	1			ACAACCGCAACCGCATCTGCTGC	2	AGCAGATGCGGTTGCGGTTGTGG	1
AGAACAAACCGGCGGATATTCTTG	48	AGAATATCCGCCGGTTTGTTCTGT	2			AAAAGAGATTATTTACGCTGCTAC	1	AGCAGCGTAAATAATCTCTTTTAA	1
AAATTCATACAAACATATTCTTA	2	AGAATATGTTTGTATGAATTTCA	14			AATGATTAAATCGGTAGCTGCTGC	1	AGCAGCTACCGATTTAATCATTAC	1
AAGTGGAATCCGTAAATATTCTAA	1	AGAATATTTACGGATTCCACTTTT	1			AAACCGGTGACAGTAGCTGCTTA	1	AGCAGCTACTGTCACCGGTTTAA	1
AATAACCCCATAAAAATATTCTAA	3	AGAATATTTTTATGGGGTTATTGT	3			ACGGGTGAGCTGACGAGCTGCTTG	1	AGCAGCTCGTCAGCTCACCCGTCT	2
ACTATCTGCGGCGGATTCTAC	1	AGAATCCGCCGCAGATAGTAT	1			ACACCCATTGCAGAAACCTGCTAA	1	AGCAGGTTTCTGCAATGGGTGTTG	2
ACAGATGGTAGTGTTCGATTCTAG	3	AGAATCGAACACTACCATCTGTTA	1			ACAAACAAATCTACTGACTGCTTC	1	AGCAGTCAGTAGATTTGTTTGTGT	1
AAGAACGATCTGGCTAGATTCTTG	1	AGAATCTAGCCAGATCGTTCTTAT	1			ACGCCGAAGTCAGTCGACTGCTTA	1	AGCAGTCGACTGACTTCGGCGTTG	1
AAAGGTAGATATAGAGATTCTTA	4	AGAATCTCTATATCTACCTTTTA	1			AATGACCGCTACACTGCTTA	2	AGCAGTGTAGCGGTCATTTA	4
AACGAATGGTCTACAAGATTCTGA	1	AGAATCTTGTAGACCATTCGTTGC	2			AAATGACCGCTACACTGCTTA	33	AGCAGTGTAGCGGTCATTTAA	18
AAAGGCAAGAGCACAAGATTCTAT	3	AGAATCTTGTGCTCTTGCCTTTTT	2			AGAAGCCGACCAAACACTGCTGA	1	AGCAGTGTTTGGTCGGCTTCTAC	1
AAATCCCTTGTAAATCATTCTAT	1	AGAATGATTTACAAGGGATTTTA	10			ACATGAGAAAATCTGTTATGCTTT	1	AGCATAACAGATTTTCTCATGTCA	1
AAAATCCCTTGTAAATCATTCTAA	1	AGAATGATTTACAAGGGATTTTAA	3			ACAAAAACATCATTTGTATGCTTC	1	AGCATACAAATGATGTTTTTGTTT	1
AAAATCCCTTGTAAATCATTCTTT	1	AGAATGATTTACAAGGGATTTTAA	3			AGATTTTGACCCGCGGTATGCTAG	10	AGCATACCGCGGGTCAAAATCTAG	3
ACCCATAAACTAATTGCATTCTCA	1	AGAATGCAATTAGTTTATGGGTAT	1			AATTAAGTACTGATGATGCTGA	15	AGCATCATCAGTACTTAATTTC	1
AAAGAACAGAGCCGGCATTCTCC	1	AGAATGCCGGCTCTGTTCTTTAG	1			AGAGACTACTGATGGAGATGCTCT	21	AGCATCTCCATCAGTAGTCTCTTA	1
ACTTGTTTGAGAAGTCCATTCTAT	2	AGAATGGACTTCTCAAACAAGTAA	10			AATTGGTATTATCGGAGATGCTAA	1	AGCATCTCCGATAATACCAATTTA	1
AAATAATAAATAGCTACATTCTCA	6	AGAATGTAGCTATTTATTATTTGT	1			AACTTTTGCCGATGAAGATGCTCT	1	AGCATCTTCATCGGCAAAAGTTAT	3
AAAACCCACCTAGATACATTCTTT	1	AGAATGTATCTAGGTGGGTTTTGC	1			AGATAGTCTAAGTCATGCTTA	1	AGCATGACTTAGACTATCTAT	6
AAGCCCAAACACATTTAATTCTGA	4	AGAATTAAATGTGTTTGGGCTTGA	1			AACGAAACTAATATTACATGCTGT	2	AGCATGTAATATTAGTTTCGTTCC	1
AAAAACCTACAGCAGTAATTCTAC	1	AGAATTACTGCTGTAGGTTTTTAT	1			ACGGAAACTTAACGACATGCTTA	5	AGCATGTCGTTAAGTTTCCGTTA	2
AAAGCATCTACAGGATAATTCTAG	2	AGAATTATCCTGTAGATGCTTTGT	2			AACGGAAACTTAACGACATGCTTA	13	AGCATGTCGTTAAGTTTCCGTTAA	2
AATCAGATTCAACGAGAATTCTAC	1	AGAATTCTCGTTGAATCTGATTAA	1			AAGAGATCCCTCCTAACATGCTTC	1	AGCATGTTAGGAGGGATCTCTTTT	1
AACAACCTATCATGACAATTCTCA	1	AGAATTGTCATGATAGGTTGTTGA	2			AATCTCTCTATGTCAACATGCTAC	1	AGCATGTTGACATAGAGAGATTTC	6
AAAACATAACGACGGAAATTCTAA	10	AGAATTTCCGTCGTTATGTTTTCT	1			AACGCCCATGCCCATTAATGCTCA	1	AGCATTAATGGGCATGGGCGTTAA	1
ACAAGCTTGGACCCCAAATTCTTT	3	AGAATTTGGGGTCCAAGCTTGTCT	2			AAGGAACAAAATAAGGAATGCTTC	23	AGCATTCCTTATTTTGTTCCTTCT	2
AATTGGCCTTGTTCGTTTGTCTGT	2	AGACAAACGAACAAGGCCAATTGA	1			ACAGGATGAATCAGACAATGCTGC	1	AGCATTGTCTGATTCATCCTGTTA	1
AACATACATTGTTCGTTTGTCTGT	17	AGACAAACGAACAATGTATGTTGT	1			AGAGACTATTGATGGAAATGCTCT	2	AGCATTTCCATCAATAGTCTCTCA	1
ACTATGAATGTCCGTGTTGTCTGC	3	AGACAACACGGACATTCATAGTGC	9			AATCTCATTCACAGAAAATGCTTT	1	AGCATTTTCTGTGAATGAGATTGA	1
AAAATGGGTATACGTGTTGTCTAA	1	AGACAACACGTATACCCATTTTCT	5			ACAATACCCTTTTCCGTTGGCTAT	1	AGCCAACGGAAAAGGGTATTGTTG	1
AAAATGGGTGTAAGTGTTGTCTAA	1	AGACAACACTTACACCCATTTTCT	2			AAGCGTCCGGCATAGTTGGCTAA	1	AGCCAACTATGCCGGACGCTTAT	1
AAATGGGTATAAGTGTTGTCTAA	1	AGACAACACTTATACCCATTTTG	1			AAGAAGACGATACAAGTTGGCTCT	32	AGCCAACTTGTATCGTCTTCTTTT	3
AAATGGGTATAAGTGTTGTCTAA	1	AGACAACACTTATACCCATTTTC	1			AAAAACTTTCCTCATATTGGCTTC	1	AGCCAATATGAGGAAAGTTTTTAA	3
AAAATGGGTATAAGTGTTGTCTAA	2	AGACAACACTTATACCCATTTTGT	15			ACCAGTATCATCTGACGTGGCTTC	5	AGCCACGTCAGATGATACTGGTAT	9
AAAATGGGTATAAGTGTTGTCTAA	2	AGACAACACTTATACCCATTTTCT	9			AGAATGCAATTAGTTTATGGCTAT	2	AGCCATAAACTAATTGCATTCTCT	3
AAAATGGGTATAAGTGTTGTCTAA	2	AGACAACACTTATACCCATTTTCC	1			AAGACTAAACCGAATTATGGCTAA	1	AGCCATAATTCGGTTTAGTCTTGG	1
AAAATGGGTATAAGTGTTGTCTAA	2	AGACAACACTTATACCCATTTTGC	1			AGATCCGTCACTGGCTATGGCTTT	1	AGCCATAGCCAGTGACGGATCTAG	6
AATTCCTTGAAACCGCTTGTCTGC	1	AGACAAGCGGTTTCAAGGAATTTT	7			ACGGCCGTTAACTCGGATGGCTGA	8	AGCCATCCGAGTTAACGGCCGTAA	1
AATTTGGGGTCCAAGCTTGTCTGC	3	AGACAAGCTTGGACCCCAAATTCT	24			AATAGGCAGAACCCAAATGGCTGG	624	AGCCATTTGGGTTCTGCCTATTAA	6
ACTACTTCGTCATTGATTGTCTGT	1	AGACAATCAATGACGAAGTAGTAG	1			AGAAAAAGTAGATGTATGGGCTTA	56	AGCCCATACATCTACTTTTTCTGG	1
AATGTCCGTGCTGATTGTCTTG	6	AGACAATCAGCACGGACATTGT	2			AGAAACATCTAGATGATGGGCTTA	14	AGCCCATCATCTAGATGTTTCTAG	1
ACAATGTCCGTGCTGATTGTCTTG	15	AGACAATCAGCACGGACATTGTTT	25			ACTGGTATTCATATTGGGGGCTTT	22	AGCCCCCAATATGAATACCAGTTA	8
AACAATGTCCGTGCTGATTGTCTTG	1	AGACAATCAGCACGGACATTGTTTA	1			AACAATCAGGTTTTTTCGGGCTTT	2	AGCCCGAAAAAACCTGATTGTTCT	4
ACACACTAACTGTGGATTGTCTTT	100	AGACAATCCACAGTTAGTGTGTAG	1			AACAATCAGGTTTTTTCGGGCTTT	2	AGCCCGAAAAAACCTGATTGTTCC	3
ACCGGGAAAAAAAATTGTGTCTCA	1	AGACACAATTTTTTTTCCCGGTAT	2			AAGCGTATCAAAAGCCCGGGCTTA	3	AGCCCGGGCTTTTGATACGCTTGT	10
ACTGCCTGTGACGTATGTGTCTGG	1	AGACACATACGTCACAGGCAGTTA	2			AACCTGAGGGGATTACGGGCTTC	1	AGCCCGTAATCCCCTCAGGTTCG	1
AAACCTGGTGAAGATGGTGTCTTC	2	AGACACCATCTTCACCAGGTTTGA	1			AAGCCGGACAATCGACGGGCTGA	1	AGCCCGTCGATTGTCCGGCTTCA	1
AAAGCGATGTCTAGCGGTGTCTAT	4	AGACACCGCTAGACATCGCTTTAA	1			ACCACAGCCAAGGGAACGGGCTTG	1	AGCCCGTTCCCTTGGCTGTGGTTT	1
AAGGTTATGTTCTCCGGTGTCTAC	4	AGACACCGGAGAACATAACCTTAT	3			AGATTCTAACTAGTATAGGGCTGA	1	AGCCCTATACTAGTTAGAATCTCA	6
ACGGAAATTTAATGACGTGTCTAA	1	AGACACGTCATTAAATTTCCGTTA	1			AGATTCCAACTAGTATAGGGCTGA	8	AGCCCTATACTAGTTGGAATCTCA	13
AACAACAACTTGTTGAGTGTCTTG	2	AGACACTCAACAAGTTGTTGTTAT	1			AATAAAACTTCTGTTTGCGGCTAT	25	AGCCGCAAACAGAAGTTTTATTAG	1
AAAGATCTAGAACACAGTGTCTGC	2	AGACACTGTGTTCTAGATCTTTGT	1			ACCCTAAATACAGGCGGCGGCTGG	9	AGCCGCCGCCTGTATTTAGGGTTA	3
AAAACAAATGTCTTTGATGTCTCC	1	AGACATCAAAGACATTTGTTTTGA	1			AATCGTGCCAAACTGTCCGGCTTA	2	AGCCGGACAGTTTGGCACGATTAA	15
AACTCGTCCATTCTGCATGTCTAA	1	AGACATGCAGAATGGACGAGTTAT	40			ACATACCGTAACTCAGCCGGCTGA	2	AGCCGGCTGAGTTACGGTATGTTG	3
AATAAGATTTAACGGCATGTCTTA	4	AGACATGCCGTTAAATCTTATTAA	1			AGCACCTCCGACAATACCGGCTTA	9	AGCCGGTATTGTCGGAGGTGCTAA	5
AATGACTGATAACGGCATGTCTAT	6	AGACATGCCGTTATCAGTCATTAA	4			AAAGGGGATAGTCAGACCGGCTGC	38	AGCCGGTCTGACTATCCCCTTTCA	1
AATGACTGATAACGGCATGTCTGT	1	AGACATGCCGTTATCAGTCATTAA	4			AAAATCCTGGCGAACGGCTAT	1	AGCCGTTCGCCAGGATTTTAC	1
ACCAAGATTTGAAGGCATGTCTGT	7	AGACATGCCTTCAAATCTTGGTAA	1			ACAAGGATACACTACTTAGGCTTA	1	AGCCTAAGTAGTGTATCCTTGTTA	1
AACGATCGATACGCCATGTCTGA	1	AGACATGGCGTATCGATCGTTGG	1			AATCCGACGTGAATAGGCTGG	1	AGCCTATTCACGTCGGATTCG	1
AATGACTGATAACGACATGTCTAT	1	AGACATGTCGTTATCAGTCATTAA	2			AAGTGCTGAATCAATCGAGGCTGG	1	AGCCTCGATTGATTCAGCACTTTC	1
ACTGTAACCTGCCGGAATGTCTTC	1	AGACATTCCGGCAGGTTACAGTGT	2			AAAACGCTCTCAACTTCAGGCTAT	1	AGCCTGAAGTTGAGAGCGTTTTTG	1
AATAATATCTGTAAAGTGGTCTAT	3	AGACCACTTTACAGATATTATTAT	2			AAATGCATATGGACAGGCTAT	1	AGCCTGTCCATATGCATTTGG	1
AAACAAAAAGCGGTCTGGTCTAT	1	AGACCAGACCGCTTTTTGTTTAC	3			AAGTAATCTCCACAATAAGGCTTA	1	AGCCTTATTGTGGAGATTACTTGG	1
AACCGTTGATAGAGATGGTCTTA	1	AGACCATCTCTATCAACGGTTTC	1			AAACGACTCTAAGAGCAAGGCTAC	24	AGCCTTGCTCTTAGAGTCGTTTGT	1
ACATTGACAGTCAGATGGGTCTCG	1	AGACCCATCTGACTGTCAATGTAT	1			AACGGGGAATCATAAAAGGCTAA	1	AGCCTTTTATGATTCCCCGTTTG	1
AACGAACAAAAGCAACGGGTCTCT	1	AGACCCGTTGCTTTTGTTCGTTAC	1			AAACGGGGAATCATAAAAGGCTAA	10	AGCCTTTTATGATTCCCCGTTTGA	2
AAGGATTATGGATTTAGGGTCTAG	5	AGACCCTAAATCCATAATCCTTAA	1			ACTTTTGATTCTCTGTTTCGCTTC	1	AGCGAAACAGAGAATCAAAAGTAT	6
AGACAGTTAGAACTAGCGGTCTTG	29	AGACCGCTAGTTCTAACTGTCTGC	1			AACAGAGTAGCCAGCCTTCGCTAT	4	AGCGAAGGCTGGCTACTCTGTTGA	15
AAAGATACACCATCCCCGGTCTTA	1	AGACCGGGGATGGTGTATCTTTAT	3			ACAACTTTTGGTCGCTGTCGCTGG	3	AGCGACAGCGACCAAAAGTTGTTC	2
ACATGCCTGGCATGAACGGTCTAC	1	AGACCGTTCATGCCAGGCATGTAA	1			ACAACTTTTGGTCGCTGTCGCTGG	3	AGCGACAGCGACCAAAAGTTGTTT	1
AATGATAAATAAAAAACGGTCTGA	6	AGACCGTTTTTTATTTATCATTCA	1			ACTGTCACTAGTTTTGGTCGCTGA	1	AGCGACCAAAACTAGTGACAGTCG	1
AAGCCCGTAATCCCCTAGGTCTGA	2	AGACCTAGGGGATTACGGGCTTCA	2			AACCTCTATTTTTCTGGTCGCTGT	4	AGCGACCAGAAAAATAGAGGTTTA	3
AATTGTACATCGTTGGAGGTCTCC	3	AGACCTCCAACGATGTACAATTAT	2			AAATTGCAGTCGCCGGTCGCTGG	1	AGCGACCGGCGACTGCAATTTTT	1
AACGTAATGTGAGTCCAGGTCTTC	1	AGACCTGGACTCACATTACGTTAA	1			AAAATTGCAGTCGCCGGTCGCTGG	3	AGCGACCGGCGACTGCAATTTTTG	14
AGACACCTTCTTCACCAGGTCTGA	4	AGACCTGGTGAAGAAGGTGTCTTC	16			ACAACTTTTGGTCACGGTCGCTGA	1	AGCGACCGTGACCAAAAGTTGTTC	1
AGACATCGTCTGCACCAGGTCTAT	2	AGACCTGGTGCAGACGATGTCTTC	4			ACCGCTGTTGTCTCCGTCGCTTC	1	AGCGACGGAGACAACAGCGGTGA	2
AAATCCGGATTACAAAAGGTCTAG	1	AGACCTTTTGTAATCCGGATTTCT	4			ACTTTTTTAGGTTGCCGTCGCTAA	1	AGCGACGGCAACCTAAAAAAGTAA	1
AAAAGTAACGTACGATTCGTCTTG	1	AGACGAATCGTACGTTACTTTTAA	2			ACCAATACTACAAGTCGCTGG	1	AGCGACTTGTAGTATTGGTAT	2
AAACTGTTTTTACTTGTCGTCTGA	73	AGACGACAAGTAAAAACAGTTTTT	4			AACCGGAACTCCCATCTCGCTTC	1	AGCGAGATGGGAGTTCCGGTTGA	1
ACATATCTTAAGTGTCGTCTTT	59	AGACGACACTTAAGATATGTAT	16			ACTGTCGCTACTTTTGATCGCTGA	1	AGCGATCAAAAGTAGCGACAGTCG	4
AAACAAGTAATCAGGTCGTCTGC	9	AGACGACCTGATTACTTGTTTGA	3			AAAATTGCGGTCGCTGATCGCTGG	1	AGCGATCAGCGACCGCAATTTTTG	7
AAGTGATTTTCATTCGTCGTCTTT	3	AGACGACGAATGAAAATCACTTAT	2			AAAAAATCTGTAGTACATCGCTAA	1	AGCGATGTACTACAGATTTTTTTA	1
AAAACCCTAGTAACGTCGTCTTT	1	AGACGACGTTACTAGGGTTTTGG	1			AAACAGTAATTCCGTAATCGCTGG	1	AGCGATTACGGAATTACTGTTTCT	5
AAGATTTTGGGAACGTCGTCTTA	1	AGACGACGTTCCCAAAATCTTTC	1			AGAAATCATACCAGTAATCGCTCT	2	AGCGATTACTGGTATGATTTCTGA	4
AACTTCTATTTCACGCTCGTCTAT	3	AGACGAGCGTGAAATAGAAGTTTG	1			ACCGAAAAGATAAGTGCGCTTT	1	AGCGCACTTATCTTTTCGGTCA	1
AACCTCTATTTCACGCTCGTCTAT	1	AGACGAGCGTGAAATAGAGGTTTG	2			AACTCTTTCCCACGGATGCGCTTG	2	AGCGCATCCGTGGGAAAGAGTTGA	2
AATTGTAATTTTGCACTCGTCTTC	2	AGACGAGTGCAAAATTACAATTAT	1			AGATCTGAGACATAAGGCGCTTA	10	AGCGCCTTATGTCTCAGATCTAA	2
AAAATTGTACCTAAACTCGTCTTC	1	AGACGAGTTTAGGTACAATTTTGG	1			AACAAGTATATAATATCGCGCTAA	1	AGCGCGATATTATATACTTGTTAA	1
AACCACTCACTTCTTATCGTCTTA	1	AGACGATAAGAAGTGAGTGGTTAT	1			AGACAGATTAAGCGATCGCGCTCC	1	AGCGCGATCGCTTAATCTGTCTTG	1
AGAAAGTTTCACATTATCGTCTTC	11	AGACGATAATGTGAAACTTTCTTA	1			ACACTAGTTGATCATCCGCGCTAC	2	AGCGCGGATGATCAACTAGTGTAA	1
AGAAAGTTTCACATTATCGTCTTC	11	AGACGATAATGTGAAACTTTCTGA	1			AGAAATCGACGACACGCGCTCA	1	AGCGCGTGTCGTCGATTTCTGT	1
AAGAGCCAACTTGTATCGTCTTC	3	AGACGATACAAGTTGGCTCTTTC	12			AAACACTATCGGATCCAGCGCTAC	1	AGCGCTGGATCCGATAGTGTTTCA	1
AAAGAGCCAACTTGTATCGTCTTC	31	AGACGATACAAGTTGGCTCTTTCC	25			AAACAAAAACCATCTTTCCGCTTT	1	AGCGGAAAGATGGTTTTTGTTTGA	1
AAACCAAATAAACCGATCGTCTGC	5	AGACGATCGGTTTATTTGGTTTTT	1			AATGCTGAGAGAAGATTCCGCTTG	1	AGCGGAATCTTCTCTCAGCATTCA	1
AAGAAGCGCTCTATCATCGTCTGT	3	AGACGATGATAGAGCGCTTCTTAA	1			AAATTAAACCGCTTTGTCCGCTAC	1	AGCGGACAAAGCGGTTTAATTTGT	14
ACCACTGTTGAAGCATCGTCTAC	7	AGACGATGCTTCAACAGTGGTAC	1			AACGGTATGGAATTGGTCCGCTGC	1	AGCGGACCAATTCCATACCGTTTT	1
AATTGTAATTTTGCAATCGTCTTC	2	AGACGATTGCAAAATTACAATTAT	1			AACGGTCTGCAGATGGTCCGCTGC	1	AGCGGACCATCTGCAGACCGTTTT	9
AACTCAGTAATTTAAATCGTCTAT	1	AGACGATTTAAATTACTGAGTTAA	1			AGAGTAAACTGCTTAGTCCGCTTT	2	AGCGGACTAAGCAGTTTACTCTAA	2
AGAAGGATGTACGGTGGCGTCTAG	5	AGACGCCACCGTACATCCTTCTAG	1			AACGGTCCGTAGATGATCCGCTGC	3	AGCGGATCATCTACGGACCGTTTT	2
AACCAATAAGTTTAGCGCGTCTTC	1	AGACGCGCTAAACTTATTGGTTAT	2			AAGATCTGCACCGACGGCCGCTCC	8	AGCGGCCGTCGGTGCAGATCTTGG	1
AATATTCCGGGAGCTTCCGTCTCC	1	AGACGGAAGCTCCCGGAATATTAT	1			AAATTTATTTTTCATACCCGCTAT	1	AGCGGGTATGAAAAATAAATTTAA	1
ACTCTCTTTCCAAGATCCGTCTAC	1	AGACGGATCTTGGAAAGAGAGTGA	1			AAGACGGACTGCTTAACCCGCTAT	2	AGCGGGTTAAGCAGTCCGTCTTAA	2
AACCTAATTTTGTGGCCGTCTTT	1	AGACGGCCACAAAATTAGGTTTG	1			AAGTTGTACAAACTCTACCGCTTT	1	AGCGGTAGAGTTTGTACAACTTTG	1
AAACCTAATTTTGCGGCCGTCTTT	1	AGACGGCCGCAAAATTAGGTTTGC	4			ACACACGACGTTATCTACCGCTAA	1	AGCGGTAGATAACGTCGTGTGTAT	8
ACTAAGGGTAGTCAAGCCGTCTGC	1	AGACGGCTTGACTACCCTTAGTAT	3			ACCGTAGACAAATTAGACCGCTTT	5	AGCGGTCTAATTTGTCTACGGTTT	3
AACGCCTATGATTCTCCCGTCTCA	1	AGACGGGAGAATCATAGGCGTTGA	1			ACCGTCTATAGACCAGACCGCTTT	1	AGCGGTCTGGTCTATAGACGGTTT	5
ACGAATATACTTACCCCGTCTCA	1	AGACGGGGTAAGTATATTCGTAC	1			ACCATCTACAAACCGAACCGCTTT	1	AGCGGTTCGGTTTGTAGATGGTTT	10
AAGAAATAAAATTTTACCGTCTCA	1	AGACGGTAAAATTTTATTTCTTAC	1			AACGATGATGCATAGAACCGCTAG	4	AGCGGTTCTATGCATCATCGTTTC	1
AAGCCCAACAGAGAAACCGTCTAT	2	AGACGGTTTCTCTGTTGGGCTTTA	3			AGATGATCATCCGCGCTACGCTGC	1	AGCGTAGCGCGGATGATCATCTAA	3
AATTATAACAACAGTCACGTCTAA	1	AGACGTGACTGTTGTTATAATTAA	1			AACAGTTTTTAAAGTTGACGCTGA	2	AGCGTCAACTTTAAAAACTGTTTT	1
AACAATTGGGTATGAAACGTCTAA	1	AGACGTTTCATACCCAATTGTTTT	6			AAATGTATATGTAGATGACGCTAA	16	AGCGTCATCTACATATACATTTTT	1
AACGGCATGTCTATTTTAGTCTGG	8	AGACTAAAATAGACATGCCGTTAT	2			AATAAAGCCAGCCATCGACGCTAT	1	AGCGTCGATGGCTGGCTTTATTTC	1
AAATGTATTTCTGTTTAGTCTTA	1	AGACTAAACAGAAATACATTTGA	3			ACCGCTACCACCCGCAGACGCTGC	1	AGCGTCTGCGGGTGGTAGCGGTGT	4
AATCTGTTTCTGCGTTAGTCTTG	1	AGACTAACGCAGAAACAGATTCA	1			AAGTATTACGGTTTATCACGCTTG	1	AGCGTGATAAACCGTAATACTTTA	3
AGAAGTTTTATTAGCTTAGTCTCG	1	AGACTAAGCTAATAAAACTTCTGT	3			ACTCTCGCCCAAGCACGCTTA	4	AGCGTGCTTGGGCGAGAGTAG	66
AATAGCGGTATGTAATTAGTCTAA	1	AGACTAATTACATACCGCTATTAC	1			ACTACTCTCGCCCAAGCACGCTTA	41	AGCGTGCTTGGGCGAGAGTAGTAC	14
AAGATGGCATCTTCTATAGTCTCC	1	AGACTATAGAAGATGCCATCTTAA	1			ACTACTCTCGCCCAAGCACGCTTA	41	AGCGTGCTTGGGCGAGAGTAGTAA	1
AACACACATATACACATAGTCTCT	2	AGACTATGTGTATATGTGTGTTTA	1			AAAGGATCGATAGGCCACGCTTT	1	AGCGTGGCCTATCGATCCTTTAG	4
ACGGTAATGACGACCAGAGTCTTG	1	AGACTCTGGTCGTCATTACCGTTC	3			AACGCCTAGCGTTTAGAACGCTTA	1	AGCGTTCTAAACGCTAGGCGTTGG	6
ACGGTAACGACGACCAGAGTCTTG	2	AGACTCTGGTCGTCGTTACCGTTC	7			ACCGCCCGCAACCGCAAACGCTTG	4	AGCGTTTGCGGTTGCGGGCGGTAG	4
AATCTCTGGTTTTGCAGTCTTG	1	AGACTGCAAAACCAGAGATTTC	1			ACCGCCCGCAACCGCAAACGCTTA	1	AGCGTTTGCGGTTGCGGGCGGTAG	4
AGAATCCTCGTCTTTACAGTCTTA	1	AGACTGTAAAGACGAGGATTCTTT	2			ACCGCTACCAACCGCAAACGCTGC	1	AGCGTTTGCGGTTGGTAGCGGTTG	17
AGAAATTTAGGATACAGTCTTT	6	AGACTGTATCCTAAATTTCTAA	2			ACCGCTACCAACCGCAAACGCTGC	1	AGCGTTTGCGGTTGGTAGCGGTTA	11
AATCACTATCACCTAACAGTCTAA	1	AGACTGTTAGGTGATAGTGATTTA	1			AAGTTGTGGAAGAGAGTTAGCTTT	6	AGCTAACTCTCTTCCACAACTTGA	1
AAGATATGATAAATTAAGTCTAG	1	AGACTTAATTTATCATATCTTCA	1			AAAGAAGAAACTCAAGTTAGCTGC	10	AGCTAACTTGAGTTTCTTCTTTGC	1
AATGTCGTAACAGCCGAAGTCTTT	2	AGACTTCGGCTGTTACGACATTAA	1			ACCATTACAAAAATTCTTAGCTAT	1	AGCTAAGAATTTTTGTAATGGTTT	8
AGACACCATCTTCACCAAGTCTGA	1	AGACTTGGTGAAGATGGTGTCTTC	6			ACTGATGAAGATGCTCTTAGCTGG	6	AGCTAAGAGCATCTTCATCAGTGA	1
AACGACACTTGGTTTTTTCTCTCA	1	AGAGAAAAAACCAAGTGTCGTTAG	4			AACACATAGACACATCTTAGCTAA	3	AGCTAAGATGTGTCTATGTGTTAC	2
ACAACAAGTCAGAATTTCTCTCA	6	AGAGAAATTCTGACTTGTTGTGC	2			AGAATGCAAATCCTTAGCTAT	10	AGCTAAGGATTTGCATTCTCA	21
AACGGTTCCCGATTGGTTCTCTTT	1	AGAGAACCAATCGGGAACCGTTGA	1			AAACAGCCGGATCTGATTAGCTGG	2	AGCTAATCAGATCCGGCTGTTTAT	3
AAGGAAATTACAAACGTTCTCTTT	1	AGAGAACGTTTGTAATTTCCTTGT	1			AGAAATCCAGAGGAGATTAGCTGA	1	AGCTAATCTCCTCTGGATTTCTCT	1
ACTTTAGCCATGGAGTTCTCTTT	1	AGAGAACTCCATGGCTAAAGTCT	3			AATCCAGCGCACGGTAGCTTC	2	AGCTACCGTGCGCTGGATTAT	2
AAAAGGCCAATAAGTTCTCTCG	2	AGAGAACTTATTGGCCTTTTGC	7			AGCAGATAACCAGAACGTAGCTTT	8	AGCTACGTTCTGGTTATCTGCTCC	2
ACACTTAACTATGTTCTTCTCTTT	1	AGAGAAGAACATAGTTAAGTGTCA	2			AGAAAACCGACCAAAACTAGCTTT	1	AGCTAGTTTTGGTCGGTTTTCTTT	3
AGACACCTTCAATATCTTCTCTGC	1	AGAGAAGATATTGAAGGTGTCTAT	2			AAGGTGTCCAAAAGTAATAGCTTA	1	AGCTATTACTTTTGGACACCTTGA	1
AACACTCCACATCATCTTCTCTTT	1	AGAGAAGATGATGTGGAGTGTTAA	12			ACTGCATGCGTTGGCTTGAGCTTG	1	AGCTCAAGCCAACGCATGCAGTAC	1
AACAAGTCAAAGTGCCTTCTCTTT	1	AGAGAAGGCACTTTGACTTGTTAA	3			AGAGCAGCCCCACCGGTGAGCTTT	3	AGCTCACCGGTGGGGCTGCTCTAA	1
AACAAGCCAAAGTGCCTTCTCTTT	19	AGAGAAGGCACTTTGGCTTGTTAA	1			AGAGTTAATTCAGAACTGAGCTAA	1	AGCTCAGTTCTGAATTAACTCTAA	5
AACATTCTATATAGACTTCTCTGG	1	AGAGAAGTCTATATAGAATGTTAC	1			AACGCATGAACTCTAATGAGCTAA	2	AGCTCATTAGAGTTCATGCGTTGC	2
ACAGTTTTCTCTTGTATTCTCTGT	1	AGAGAATACAAGAGAAAACTGTGA	14			ACACTCTCCAAGGGTTCGAGCTTT	1	AGCTCGAACCCTTGGAGAGTGTTT	6
AAAAAATTTAGCAGAATTCTCTAA	2	AGAGAATTCTGCTAAATTTTTTAT	1			AGACGGGTGAGCTGACGAGCTGG	1	AGCTCGTCAGCTCACCCGTCTCA	1
AAAGAACAACAGAATTCTCTAT	1	AGAGAATTCTGTTGTTCTTTGA	1			AATCAGAATCAAACGAGCTTT	3	AGCTCGTTTGATTCTGATTTT	1
AAGTTTCTTTGTTATTGTCTCTAC	1	AGAGACAATAACAAAGAAACTTAT	5			AGACGATTAAAGGAGGTCAGCTGG	3	AGCTGACCTCCTTTAATCGTCTTT	1
ACCCAGAACACAGATTGTCTCTCC	1	AGAGACAATCTGTGTTCTGGGTAA	1			AGAAATGTTGTCTCCGGCAGCTAA	1	AGCTGCCGGAGACAACATTTCTAA	1
AAATAAAGTATAAATGGTCTCTCA	1	AGAGACCATTTATACTTTATTTTA	1			AGAGAGTACAGAAAGAGCAGCTTG	18	AGCTGCTCTTTCTGTACTCTCTGG	2
AAGGCACCACGTCATCGTCTCTCA	1	AGAGACGATGACGTGGTGCCTTAT	1			AGCTCACCCGTCTCAAGCAGCTCG	1	AGCTGCTTGAGACGGGTGAGCTGA	8
AATGTTATTAATTACCGTCTCTTT	4	AGAGACGGTAATTAATAACATTTA	7			AACACAATCTACTCAAGCAGCTAC	2	AGCTGCTTGAGTAGATTGTGTTTC	1
ACCATTCATGACCTTAGTCTCTTC	1	AGAGACTAAGGTCATGAATGGTGA	34			AGCAGCCGCGGTAATTCCAGCTCC	2	AGCTGGAATTACCGCGGCTGCTGG	1
AACTATGGTTCATATAGTCTCTGG	1	AGAGACTATATGAACCATAGTTAA	1			AGATGATGACCTTAGTCCAGCTGT	2	AGCTGGACTAAGGTCATCATCTCC	1
ACACATATACACATAGTCTCTCA	1	AGAGACTATGTGTATATGTGTGT	1			AACACACGGGAGACCAGCTTC	4	AGCTGGTCTCCCGTGTGTTAC	1
AACATTTCCATTGGGAGTCTCTAG	1	AGAGACTCCCAATGGAAATGTTCT	4			AAACTTCGGAGGGAACCAGCTAC	1	AGCTGGTTCCCTCCGAAGTTTCC	9
AAATAATCGCAGAGGAGTCTCTAC	3	AGAGACTCCTCTGCGATTATTTAG	5			AACAGCCAAAGTCTTTACAGCTAA	1	AGCTGTAAAGACTTTGGCTGTTAA	9
AATACTTCTGATACCAGTCTCTGA	4	AGAGACTGGTATCAGAAGTATTAC	146			AATAAAAGTTACGGGTACAGCTAA	1	AGCTGTACCCGTAACTTTTATTGC	1
ACATGCAAAAAAAGTCTCTTG	1	AGAGACTTTTTTTGCATGTAT	15			AGAGATTCTCTACCGTTAAGCTAC	1	AGCTTAACGGTAGAGAATCTCTTA	1
AGACAGATTTCAAGTTCTCTCTTG	1	AGAGAGAACTTGAAATCTGTCTGG	4			ACTGATGGAGACGCTCTAAGCTAC	9	AGCTTAGAGCGTCTCCATCAGTAG	1
ACCAATCATACGCATTCTCTCTCT	1	AGAGAGAATGCGTATGATTGGTTG	1			AAAAGACTTCAGTCATAAGCTTT	1	AGCTTATGACTGAAGTCTTTTTG	1
AACAAATGGTGAGGGTCTCTCTCC	1	AGAGAGACCCTCACCATTTGTTTT	1			AGAGCTGTATGTGTCGAAGCTTA	2	AGCTTCGACACATACAGCTCTTT	1
AATGGGATATCTTTCTCTCTCTTA	1	AGAGAGAGAAAGATATCCCATTAA	1			AAACGAGTAATATCTAGAAGCTGA	11	AGCTTCTAGATATTACTCGTTTAT	1
AGAAACGTGTCTGACTCTCTCTCC	4	AGAGAGAGTCAGACACGTTTCTAG	8			AAACGACGATGAGCCAGAAGCTGC	2	AGCTTCTGGCTCATCGTCGTTTGC	3
AGAAACTTTATACACTCTCTCTCC	3	AGAGAGAGTGTATAAAGTTTCTCA	1			AAGGGAGAAAGCGTATCAAGCTGA	1	AGCTTGATACGCTTTCTCCCTTCA	2
AGACCTGGGTTCGATCCTCTCTGA	2	AGAGAGGATCGAACCCAGGTCTGG	1			AACTGTCAAAGCTGTACAAGCTGT	1	AGCTTGTACAGCTTTGACAGTTAC	2
AAAGTTTCTCACTACACTCTCTCT	1	AGAGAGTGTAGTGAGAAACTTTGA	2			AAGAATTAGTAGACCACAAGCTCA	14	AGCTTGTGGTCTACTAATTCTTAC	1
AGAAACTTTCTATACACTCTCTCC	1	AGAGAGTGTATAGAAAGTTTCTCA	5			AGAGTTGCATGAATAGAAAGCTAG	1	AGCTTTCTATTCATGCAACTCTGT	1
AAGCAAAAAAGTGTCTATCTCTCT	3	AGAGATAGACACTTTTTTGCTTTT	1			AGACTGGTACGTAATCAAAGCTTT	1	AGCTTTGATTACGTACCAGTCTGA	1
ACGCTCCTCTCGCATGATCTCTTG	1	AGAGATCATGCGAGAGGAGCGTCA	2			AAATGATCAAACAAACAAAGCTCC	4	AGCTTTGTTTGTTTGATCATTTGG	4
AGAAAAAAAGTGAAGGATCTCTGA	2	AGAGATCCTTCACTTTTTTTCTTC	1			AAAAAGTGTAGGGGGAAAAGCTGA	1	AGCTTTTCCCCCTACACTTTTTAC	1
AGAAAAAAAGTGAAGGATCTCTGG	1	AGAGATCCTTCACTTTTTTTCTTC	1			AAAAAGTGTAGGGGGAAAAGCTGA	1	AGCTTTTCCCCCTACACTTTTTGC	1
ACAATTTTACCCTCGATCTCTAA	1	AGAGATCGAGGGTAAAATTGTAA	1			AAGCCTAAGTAGTGTTTCCTTG	2	AGGAAACACTACTTAGGCTTTT	2
ACTTCATGTAGATCTCATCTCTAA	1	AGAGATGAGATCTACATGAAGTTA	37			AAGCCTAAGTAGTGTTTCCTTG	2	AGGAAACACTACTTAGGCTTAT	1
AAAACACCCCTAATCCATCTCTGA	1	AGAGATGGATTAGGGGTGTTTTGA	3			AAGCCTAAGTAGTGTTTCCTTG	2	AGGAAACACTACTTAGGCTTTA	1
ACGGCATCTCCAACACATCTCTAT	35	AGAGATGTGTTGGAGATGCCGTAA	21			AAAGCCTAAGTAGTGTTTCCTTA	3	AGGAAACACTACTTAGGCTTTTA	73
ACGCTGTAGGATTAACATCTCTGT	1	AGAGATGTTAATCCTACAGCGTTC	5			AAAGCCTAAGTAGTGTTTCCTTA	3	AGGAAACACTACTTAGGCTTTCA	2
AATCTGTTTCATGTAATCTCTGT	1	AGAGATTACATGAAACAGATTAA	10			AAAGCCTAAGTAGTGTTTCCTTA	3	AGGAAACACTACTTAGGCTTTTG	1
AAGGCGAAGTCCGTAATCTCTCC	1	AGAGATTACGGACTTCGCCTTAG	1			AAAGCCTAAGTAGTGTTTCCTTA	3	AGGAAACACTACTTAGGCTTTTT	1
AACAAGCATCGCATAAATCTCTAA	2	AGAGATTTATGCGATGCTTGTTGA	1			AAAAGCCTAAGTAGTGTTTCCTTG	4	AGGAAACACTACTTAGGCTTTTAA	54
ACACAGTTACAGCAAAATCTCTAC	5	AGAGATTTTGCTGTAACTGTGTTG	1			AAAAGCCTAAGTAGTGTTTCCTTG	4	AGGAAACACTACTTAGGCTTTTAG	22
ACACAGCTACACCAAAATCTCTAC	1	AGAGATTTTGGTGTAGCTGTGTTA	14			AAAAGCCTAAGTAGTGTTTCCTTG	4	AGGAAACACTACTTAGGCTTTTAT	17
AATTAACATGCGGATTTGCTCTAG	1	AGAGCAAATCCGCATGTTAATTCC	1			AAAAGCCTAAGTAGTGTTTCCTTG	4	AGGAAACACTACTTAGGCTTTTTA	4
AATTAACATGCGGATTTGCTCTAG	1	AGAGCAAATCCGCATGTTAATTCT	1			AAAAGCCTAAGTAGTGTTTCCTTG	4	AGGAAACACTACTTAGGCTTTTAC	3
AATGATATGTTAACGTTGCTCTAA	1	AGAGCAACGTTAACATATCATTAT	1			AAGCCCTAATTTCGAGTTTCCTTC	1	AGGAAACTCGAAATTAGGGCTTTA	9
AGAAAATGGGACCCGGTGCTCTGG	1	AGAGCACCGGGTCCCATTTTCTAA	2			AATAGACACTATTCTCTTTCCTCT	1	AGGAAAGAGAATAGTGTCTATTTC	1
ACAAACTGGTGGAAACTGCTCTGG	1	AGAGCAGTTTCCACCAGTTTGTAT	2			AGCATTCCTTATTTTGTTCCTTC	1	AGGAACAAAATAAGGAATGCTTC	1
AGACTATTGATGGAGATGCTCTGA	4	AGAGCATCTCCATCAATAGTCTCT	1			AAGCATTCCTTATTTTGTTCCTTC	3	AGGAACAAAATAAGGAATGCTTCT	10
ACTACTAATGGAGATGCTCTTA	1	AGAGCATCTCCATTAGTAGTCT	5			AATGTAGAGAGTGGTGGTTCCTTG	9	AGGAACCACCACTCTCTACATTAT	1
AGACTATTGATGGAAATGCTCTAA	9	AGAGCATTTCCATCAATAGTCTCT	1			ACATGAGTATGACTGGTTCCTAG	1	AGGAACCAGTCATACTCATGTAT	1
AGACGATACAAGTTGGCTCTTT	2	AGAGCCAACTTGTATCGTCTTC	2			ACCAGGGCAGAGTCGGTTCCTAA	1	AGGAACCGACTCTGCCCTGGTAA	4
AAGACGATACAAGTTGGCTCTTT	3	AGAGCCAACTTGTATCGTCTTCT	3			AATGACGCAGGCTCTTCCTCA	1	AGGAAGAGCCTGCGTCATTAT	1
AAACTGTTTCTGACATGGCTCTAT	1	AGAGCCATGTCAGAAACAGTTTCA	2			AAGAGAGATAAAAGAGCTTCCTAA	2	AGGAAGCTCTTTTATCTCTCTTCT	2
AATAACAATACCGGGCTCTTT	25	AGAGCCCGGTATTGTTATTTA	2			AACAGATTTGATGCAGCTTCCTAA	1	AGGAAGCTGCATCAAATCTGTTAG	25
ACAACTTTTCTATACGGCTCTTT	1	AGAGCCGTATAGAAAAGTTGTTA	1			AATCTCACCCGCTGTCCTTCCTAA	1	AGGAAGGACAGCGGGTGAGATTCA	7
AACAACTTTTCTATACGGCTCTTT	8	AGAGCCGTATAGAAAAGTTGTTAA	1			AGATGTACTGTACTCCTTCCTTA	1	AGGAAGGAGTACAGTACATCTTG	2
AACCTAAACGTCTGTTCGCTCTAT	1	AGAGCGAACAGACGTTTAGGTTTT	2			AGAGCTTCTGTCATACCTTCCTAC	1	AGGAAGGTATGACAGAAGCTCTCT	2
ACTTTAGAAAAAACTGCGCTCTGA	1	AGAGCGCAGTTTTTTCTAAAGTAT	3			ACGCATTTTCTAGATTATTCCTTT	2	AGGAATAATCTAGAAAATGCGTTG	4
AAGTGGTAAGGTAGGGCGCTCTTC	1	AGAGCGCCCTACCTTACCACTTGA	1			AGAATATCTTATACTGATTCCTGA	4	AGGAATCAGTATAAGATATTCTGA	1
AAGTCTAGGTGGCAAGCTCTCA	2	AGAGCTTGCCACCTAGACTTCA	1			AGACCGCAAAGTTTGGATTCCTGT	1	AGGAATCCAAACTTTGCGGTCTTT	1
AAACAAGCTTTCTTCTTCCTCTTT	1	AGAGGAAGAAGAAAGCTTGTTTAG	5			AATCATATATCTCTTCATTCCTTG	1	AGGAATGAAGAGATATATGATTAA	8
AACGGAAAATGAGTTATCCTCTTG	7	AGAGGATAACTCATTTTCCGTTAC	3			AATGAATCAGAAGCATTCCTTA	5	AGGAATGCTTCTGATTCATTGT	43
AACGGAAAGTGAGCTATCCTCTTG	1	AGAGGATAGCTCACTTTCCGTTAC	2			ACAATGAATCAGAAGCATTCCTTA	13	AGGAATGCTTCTGATTCATTGTCC	36
ACAGGTGGCCTGACTATCCTCTGG	2	AGAGGATAGTCAGGCCACCTGTAT	4			AGAAAATAATATCTTAATTCCTAT	1	AGGAATTAAGATATTATTTTCTGG	4
ACTGTTTTCAAGTATCGCCTCTGT	1	AGAGGCGATACTTGAAAACAGTTT	12			ACATAGACGACGGACAATTCCTTT	1	AGGAATTGTCCGTCGTCTATGTAA	1
AAGTCCTCGTGTTGCATCCCTCTTT	1	AGAGGGATGCAACACGAGGACTTCT	1			AACTAGATAACGGACAATTCCTTC	1	AGGAATTGTCCGTTATCTAGTTGT	1
AAGTCCTCGTGTTGCATCCCTCTTT	1	AGAGGGATGCAACACGAGGACTTTC	1			ACTTTACCAAATCAAAATTCCTAA	1	AGGAATTTTGATTTGGTAAAGTGC	3
AAAATTCCTAAATTGCCCTCTGA	1	AGAGGGCAATTTAGGAATTTTGA	2			AGAAGCATGGACGTGTCCTGA	1	AGGACACGTCCATGCTTCTTA	3
AACGATTGACAACGCACCCTCTTA	1	AGAGGGTGCGTTGTCAATCGTTTC	1			AGCACTCCTTCTGGTCTGTCCTGA	1	AGGACAGACCAGAAGGAGTGCTGA	1240
AAACACTTTCTCCATTACCTCTAA	1	AGAGGTAATGGAGAAAGTGTTTAA	68			AAGTTAACTCCAATCTGTCCTTG	1	AGGACAGATTGGAGTTAACTTTT	5
ACAACATGTAACGCGACCTCTAA	1	AGAGGTCGCGTTACATGTTGTAC	1			AATTTGAATGAGCATATGTCCTGT	1	AGGACATATGCTCATTCAAATTGG	5
ACTCGAACCGGCAACCTCTAA	4	AGAGGTTGCCGGTTCGAGTGA	1			ACAGACAGTGTGGTGGTCCTTC	2	AGGACCACCACACTGTCTGTCC	1
ACTTATTTACAACCCAACCTCTAT	1	AGAGGTTGGGTTGTAAATAAGTAA	2			ACTTGACACGTGGCACGGTCCTAT	1	AGGACCGTGCCACGTGTCAAGTCA	1
AACTGATACCAAATTTTACTCTGT	1	AGAGTAAAATTTGGTATCAGTTAT	1			ACTAACAATTGTTTTCGTCCTTA	1	AGGACGAAAACAATTGTTAGTTA	1
AGAATGTTAACCGGTTTACTCTGG	1	AGAGTAAACCGGTTAACATTCTTA	1			AACTAACAGCTGTTTTCGTCCTTA	3	AGGACGAAAACAGCTGTTAGTTAC	3
ACAGAATGACCGAATTACTCTCA	1	AGAGTAATTCGGTCATTCTGTTC	1			ACTAACAACTGTTTTCGTCCTTA	3	AGGACGAAAACAGTTGTTAGTTA	1
AACAGAATGACCGAATTACTCTCA	9	AGAGTAATTCGGTCATTCTGTTCA	2			AACTAACAACTGTTTTCGTCCTTA	2	AGGACGAAAACAGTTGTTAGTTAT	3
ACAGAATGACCAAATTACTCTCA	23	AGAGTAATTTGGTCATTCTGTTC	1			AACTAACAACTATTTTCGTCCTTA	3	AGGACGAAAATAGTTGTTAGTTAC	1
ACAGAATGACCAAATTACTCTTA	8	AGAGTAATTTGGTCATTCTGTTC	1			AACCACTAGGCTAACTCGTCCTTA	1	AGGACGAGTTAGCCTAGTGGTTAA	1
ACTACAATCAGAATGGTACTCTAA	1	AGAGTACCATTCTGATTGTAGTAG	5			AAATTCAAGATTGAATCGTCCTAA	1	AGGACGATTCAATCTTGAATTTCA	11
AACCGACCGCTGGGGCTACTCTGA	1	AGAGTAGCCCCAGCGGTCGGTTTT	5			AATCCTAATGCAAAATCGTCCTAA	3	AGGACGATTTTGCATTAGGATTGC	1
ACCCACTCAAATTTTATACTCTAC	1	AGAGTATAAAATTTGAGTGGGTAT	1			ACCAGTATGTTATGCGTCCTAT	8	AGGACGCATAACATACTGGTAA	1340
AATGATGACAGATAAATACTCTAA	2	AGAGTATTTATCTGTCATCATTAT	2			ACTCGTCCCGTCAATCCGTCCTGT	1	AGGACGGATTGACGGGACGAGTTT	2
AAATTCTCCATCGCGTGACTCTTT	2	AGAGTCACGCGATGGAGAATTTGG	1			AACGTCCTGCCAAATCCGTCCTAC	1	AGGACGGATTTGGCAGGACGTTAC	7
AACTCCGACAGAAGACTCTGC	1	AGAGTCTTCTGTCGGAGTTGA	1			ACCGGATTAAGCATGCCGTCCTAT	1	AGGACGGCATGCTTAATCCGGTTT	7
AAAATCTGTCATATTTCACTCTAT	1	AGAGTGAAATATGACAGATTTTGC	1			AACGTTCTGTCAAACCCGTCCTGC	1	AGGACGGGTTTGACAGAACGTTAC	3
ACATTGCCTTAAGATCACTCTCT	1	AGAGTGATCTTAAGGCAATGTGA	3			ACTATCGACTCAAACCCGTCCTAC	1	AGGACGGGTTTGAGTCGATAGTAA	1
AAAATCTGCCATATTCCACTCTAT	1	AGAGTGGAATATGGCAGATTTTGC	37			ACTATCGATCCAAACCCGTCCTAC	1	AGGACGGGTTTGGATCGATAGTAA	2
AAGAACGCCTCACTTTAACTCTTA	1	AGAGTTAAAGTGAGGCGTTCTTAT	2			AACATCCTGCCAAACCCGTCCTGT	1	AGGACGGGTTTGGCAGGATGTTAC	26
AATAACATCTCATGGTAACTCTAA	1	AGAGTTACCATGAGATGTTATTTA	7			ACCGGAAATGTCGTACCGTCCTGA	1	AGGACGGTACGACATTTCCGGTAT	85
AAAAGTATTTTGTTCTAACTCTTT	1	AGAGTTAGAACAAAATACTTTTAA	1			AACTTTTATTAAGTAACGTCCTGC	2	AGGACGTTACTTAATAAAAGTTGT	1
AGACATTGACGGTCTCAACTCTAC	4	AGAGTTGAGACCGTCAATGTCTGA	1			AACTGTTATTAAGTAACGTCCTGC	5	AGGACGTTACTTAATAACAGTTGT	1
AATGTGGTAGATGCAACTCTTT	55	AGAGTTGCATCTACCACATTCA	2			AATTATTATTAAGTAACGTCCTAT	1	AGGACGTTACTTAATAATAATTGT	1
AAATTATATCTGCTACAACTCTTA	2	AGAGTTGTAGCAGATATAATTTAA	2			AGCAGTAAACGCAACTAGTCCTAA	1	AGGACTAGTTGCGTTTACTGCTTA	1
AGAAAGTACGTCTTCAAACTCTAA	2	AGAGTTTGAAGACGTACTTTCTTG	1			AATTGTGTGTTGTTGGAGTCCTAA	1	AGGACTCCAACAACACACAATTGA	1
AGACGATTTAAATACAAACTCTAA	4	AGAGTTTGTATTTAAATCGTCTGA	1			AAGGTGCCAGCGGAGTCCTAT	1	AGGACTCCGCTGGCACCTTAT	1226
AAATTTCTTTACCTAAAACTCTAA	1	AGAGTTTTAGGTAAAGAAATTTGG	2			AATACGTCTGGAATTAAGTCCTTA	1	AGGACTTAATTCCAGACGTATTGG	2
AAGAAAACCCTTTAAAAACTCTTG	6	AGAGTTTTTAAAGGGTTTTCTTAT	2			ACAGACGACATCTTCTTCTCCTTC	2	AGGAGAAGAAGATGTCGTCTGTCG	20
AGAACCGTACCACAGTTTATCTGT	2	AGATAAACTGTGGTACGGTTCTAA	19			AACGTATCTCTCTTTCTCTCCTCT	1	AGGAGAGAAAGAGAGATACGTTGG	1
AAACCGCGGGGACAATTTATCTTT	2	AGATAAATTGTCCCCGCGGTTTAC	18			ACATTTTATTTGTCTCTCTCCTTC	1	AGGAGAGAGACAAATAAAATGTAA	1
ACAGACATCATGATGGTTATCTGC	1	AGATAACCATCATGATGTCTGTAC	7			AATGAGTACTTTTATCTCTCCTCT	1	AGGAGAGATAAAAGTACTCATTCC	1
AAACGGGGCAGAGAAGTTATCTAA	3	AGATAACTTCTCTGCCCCGTTTGT	3			AAACTTCTTAACAGCTCTCCTAA	1	AGGAGAGCTGTTAAGAAGTTTTA	8
AGAAAACCGCAGCGGCTTATCTGC	2	AGATAAGCCGCTGCGGTTTTCTTT	2			AACACGGTTAATCGAATCTCCTAT	1	AGGAGATTCGATTAACCGTGTTTT	3
AACACAAGGGAAGAGCTTATCTAG	2	AGATAAGCTCTTCCCTTGTGTTAT	2			AATTTGGTCTTAACAATCTCCTAA	1	AGGAGATTGTTAAGACCAAATTAC	231
AAGGTTCTATCCATCATTATCTTA	1	AGATAATGATGGATAGAACCTTGA	1			AATTTGGTCTTAACAATCTCCTAA	1	AGGAGATTGTTAAGACCAAATTAT	26
ACCAGACTTTCCGACATTATCTAT	1	AGATAATGTCGGAAAGTCTGGTTG	1			AATTTGGTCTTAACAATCTCCTAA	1	AGGAGATTGTTAAGACCAAATTAG	20
ACTATATATCCAGCCGGTATCTTA	4	AGATACCGGCTGGATATATAGTGT	2			AATATGGTCTTAACAATCTCCTAA	1	AGGAGATTGTTAAGACCATATTAC	21
AAACATGTTCCACCGGTATCTTC	1	AGATACCGGTGGAACATGTTTTC	1			AATCTTGGTGGTATGGGCTCCTGT	2	AGGAGCCCATACCACCAAGATTAG	2
AAGTAAGAGTTTTTCAGTATCTGT	5	AGATACTGAAAAACTCTTACTTGC	2			AATCTTGGTGGTATGGGCTCCTAT	1	AGGAGCCCATACCACCAAGATTAG	2
AATCATATATTGGGCTCTATCTAG	2	AGATAGAGCCCAATATATGATTAC	1			ACACACCGCCCGTCGCTCCTAC	9	AGGAGCGACGGGCGGTGTGTAC	2
AATACACTGATTTCCTCTATCTCT	1	AGATAGAGGAAATCAGTGTATTAT	1			AAGTCTAGGTGGCAAGCTCCTCA	1	AGGAGCTTGCCACCTAGACTTCA	1
AGAAATCAGCTGTCCTCTATCTGT	1	AGATAGAGGACAGCTGATTTCTAA	22			AGAACAAGTCAAGAAAGCTCCTAA	17	AGGAGCTTTCTTGACTTGTTCTAT	4
AAAGCAAAAAAAGTATCTATCTCT	1	AGATAGATACTTTTTTTGCTTTTG	1			AATATACTTGAGGGGGCCTCCTAT	1	AGGAGGCCCCCTCAAGTATATTGT	3
AACCTGAGAGAGTCATCTATCTAC	3	AGATAGATGACTCTCTCAGGTTGA	2			AATATCATCATTTCCACCTCCTTA	2	AGGAGGTGGAAATGATGATATTTC	25
AAGGCTCTTGTCGTCGCTATCTGT	5	AGATAGCGACGACAAGAGCCTTGA	2			AAACATTTACTTATTTACTCCTTC	1	AGGAGTAAATAAGTAAATGTTTAT	2
AAATTTCAGCCATATACTATCTGC	3	AGATAGTATATGGCTGAAATTTGC	14			ACAAGATGTACTGTACTCCTTC	1	AGGAGTACAGTACATCTTGTTA	1
AATCTGTAGGTGTGTTATATCTTT	1	AGATATAACACACCTACAGATTCG	1			AGCGGCGAAAAATTCTACTCCTGA	2	AGGAGTAGAATTTTTCGCCGCTTT	7
AAAGACAGCAGCGATTATATCTAA	32	AGATATAATCGCTGCTGTCTTTGA	1			AAGAATTGCCGGTGCTACTCCTCC	1	AGGAGTAGCACCGGCAATTCTTGA	1
AATACACACTTATTATATATCTAC	1	AGATATATAATAAGTGTGTATTAG	1			AGGAAACAGTCAGAATACTCCTGC	2	AGGAGTATTCTGACTGTTTCCTGT	1
ACGGATAACTATGCATATATCTAT	3	AGATATATGCATAGTTATCCGTAA	4			AACCCACGGTGCCACTCCTAT	1	AGGAGTGGCACCGTGGGTTGT	15
AATATGCAGATTGAATATATCTAA	2	AGATATATTCAATCTGCATATTCA	1			AACAACCCACGGTGCCACTCCTAT	16	AGGAGTGGCACCGTGGGTTGTTTT	6
AACGACTTCTTTAAATATATCTGG	1	AGATATATTTAAAGAAGTCGTTTA	1			ACCTGCAGATAAACAACTCCTCA	1	AGGAGTTGTTTATCTGCAGGTTT	1
AATATGCAGATTAAATATATCTAA	1	AGATATATTTAATCTGCATATTCA	2			ACATATATGCTTTGGTTATCCTTT	1	AGGATAACCAAAGCATATATGTAT	4
AAGCCAAATGCCGATGATATCTGA	1	AGATATCATCGGCATTTGGCTTAA	2			AAGGCGTAAGAATTGTATCCTTA	11	AGGATACAATTCTTACGCCTTTA	21
AAGTATGTTTTCGGGGATATCTAA	2	AGATATCCCCGAAAACATACTTAT	5			AAGGCGTAAGAATTGTATCCTTG	4	AGGATACAATTCTTACGCCTTTA	21
ACCGACTGATCTTATCATATCTAT	1	AGATATGATAAGATCAGTCGGTTT	1			AAAGGCGTAAGAATTGTATCCTTG	14	AGGATACAATTCTTACGCCTTTAA	32
AAGCCTGACGCTTTTAATATCTTG	1	AGATATTAAAAGCGTCAGGCTTAA	2			AAAGGCGTAAGAATTGTATCCTAG	6	AGGATACAATTCTTACGCCTTTAA	32
AAAGAAATGCATAGTAATATCTGT	1	AGATATTACTATGCATTTCTTTTT	1			AAAAGCCTAAGTAGTGTATCCTTG	1	AGGATACACTACTTAGGCTTTTAA	19
AAAAGACGTTCTTATAATATCTGT	2	AGATATTATAAGAACGTCTTTTGG	1			ACTAATAAAGACTGTATCCTAA	10	AGGATACAGTCTTTATTAGTGA	5
AAGTGGAATCCGTAAATATCTTA	4	AGATATTTACGGATTCCACTTTT	1			AACAGGCTAACCGGGGTATCCTGG	1	AGGATACCCCGGTTAGCCTGTTAA	1
AATTAAATGCTATCAAATATCTCT	1	AGATATTTGATAGCATTTAATTAC	1			ACATTTACCTAATTCGTATCCTTA	5	AGGATACGAATTAGGTAAATGTTG	17
ACATCTGCTAGACGATTGATCTTC	2	AGATCAATCGTCTAGCAGATGTAT	1			AAGATGTTTGAAGAGCTATCCTTA	1	AGGATAGCTCTTCAAACATCTTTC	1
AGATATGAAAGACCGTGATCTGA	1	AGATCACGGTCTTTCATATCTGG	1			AAACCGTCTCACCATATATCCTAG	1	AGGATATATGGTGAGACGGTTTGG	20
AACGATGTACAATTATGGATCTAA	1	AGATCCATAATTGTACATCGTTGT	1			AACTCTGGTGAAGTCATATCCTAA	3	AGGATATGACTTCACCAGAGTTAT	2
AAAAGAGTAAGATGGATCTTG	1	AGATCCATCTTACTCTTTTGC	1			AATTCCGTGATTGACATATCCTAA	2	AGGATATGTCAATCACGGAATTAT	24
AGAAGCTTAGAAATGGATCTGA	363	AGATCCATTTCTAAGCTTCTTC	1			AGCGACGTTGCTTTTTGATCCTTC	51	AGGATCAAAAAGCAACGTCGCTAT	2
AAAAACGGTTACCGTCGGATCTAT	63	AGATCCGACGGTAACCGTTTTTAT	4			AGAGATCCTCCTCTTGATCCTGG	1	AGGATCAAGAGGAGGATCTCTCT	1
AAAAACGATTACCGTCGGATCTAT	2	AGATCCGACGGTAATCGTTTTTAT	1			AAATAAAATGTGGTCTGATCCTTC	1	AGGATCAGACCACATTTTATTTAC	1
AAGTCAAACGATCGGATCTTT	2	AGATCCGATCGTTTGACTTGA	1			ACTTGACACGTGGCATGATCCTAT	1	AGGATCATGCCACGTGTCAAGTCA	1
AAATCTTGAGTACGCCGGATCTAA	1	AGATCCGGCGTACTCAAGATTTCA	1			AGAGGTTGTATCCTGGGATCCTTA	7	AGGATCCCAGGATACAACCTCTAT	1
ACTTAAACTGCAACCGGATCTTA	5	AGATCCGGTTGCAGTTTAAGTTC	1			ACTTAAAAAACACGCGGATCCTTT	1	AGGATCCGCGTGTTTTTTAAGTGA	2
AACTTAAACCGCAACTCGATCTTA	1	AGATCGAGTTGCGGTTTAAGTTGT	1			AGAGATGCGGTTTAAGGATCCTAT	6	AGGATCCTTAAACCGCATCTCTAT	3
ACTTAAACCGCAACCCGATCTTA	2	AGATCGGGTTGCGGTTTAAGTTC	10			AAAGCGTGGCCTATCGATCCTTT	3	AGGATCGATAGGCCACGCTTTCA	1
ACTTAAACCGCAACCCGATCTTA	2	AGATCGGGTTGCGGTTTAAGTTG	2			AAAATCTGTGTTGTCCGATCCTTA	1	AGGATCGGACAACACAGATTTTAC	3
AACTTAAACCGCAACCCGATCTTA	1	AGATCGGGTTGCGGTTTAAGTTGT	40			ACTTGACACGTGGCACGATCCTAT	12	AGGATCGTGCCACGTGTCAAGTCA	23
AACTTAAACCGCAACCCGATCTTA	1	AGATCGGGTTGCGGTTTAAGTTCT	18			ACTTGACACGTGACACGATCCTAT	5	AGGATCGTGTCACGTGTCAAGTCA	1
AACTTAAACCGCAACCCGATCTTA	1	AGATCGGGTTGCGGTTTAAGTTCC	2			AAATAAAAAAAATCGTCATCCTAA	1	AGGATGACGATTTTTTTTATTTAT	2
ACTTGACACATGACACGATCTTA	1	AGATCGTGTCATGTGTCAAGTCA	1			AATAATGGCTAAGTCTCATCCTCA	1	AGGATGAGACTTAGCCATTATTGT	3
AATAATGTAATCTAGATCTTA	1	AGATCTAGATTACATTATTCA	1			AAGCGAACCCTTAGAGCATCCTCA	1	AGGATGCTCTAAGGGTTCGCTTAA	1
AAAGAATACACCAGAGAGATCTAC	1	AGATCTCTCTGGTGTATTCTTTCT	1			ACCCGTCATACCATCTAATCCTGC	1	AGGATTAGATGGTATGACGGGTTT	16
AAGCGCCTTATGTCTCAGATCTAA	4	AGATCTGAGACATAAGGCGCTTAA	2			AGAACGGTTCAGTAATAATCCTAA	1	AGGATTATTACTGAACCGTTCTAA	1
AACGGATACTCATAGCAGATCTAA	2	AGATCTGCTATGAGTATCCGTTTG	1			ACCCGAAAAGAGTGTGAATCCTGT	1	AGGATTCACACTCTTTTCGGGTTT	1
AACAAAGAAGAAAAACAGATCTGC	13	AGATCTGTTTTTCTTCTTTGTTGT	6			AATCAAAGCCAAGAAGAATCCTGA	1	AGGATTCTTCTTGGCTTTGATTCT	3
ACTACCGACTCTAAGAAGATCTAG	6	AGATCTTCTTAGAGTCGGTAGTTT	21			AGCTCTCAGTCTGTCAATCCTTA	1	AGGATTGACAGACTGAGAGCTCT	4
AATCTTGAGTCTGCATTCATCTAA	1	AGATGAATGCAGACTCAAGATTAT	7			AGATACCTCATACCTCAATCCTCA	3	AGGATTGAGGTATGAGGTATCTAA	25
ACTTGTACTCTTTCGGTCATCTAC	1	AGATGACCGAAAGAGTACAAGTGG	1			ACCAAGAATAACTGACAATCCTAA	4	AGGATTGTCAGTTATTCTTGGTTT	2
ACATTTTTTCCATCGGTCATCTTT	1	AGATGACCGATGGAAAAAATGTAG	3			ACTTGACACGTGGCACAATCCTAT	7	AGGATTGTGCCACGTGTCAAGTCA	167
AACTTCAGAGCTTTTCTCATCTGT	1	AGATGAGAAAAGCTCTGAAGTTGC	6			ACCAAAAATAACTAACAATCCTAA	1	AGGATTGTTAGTTATTTTTGGTTT	1
AAACGAACATCAAAACTCATCTCC	1	AGATGAGTTTTGATGTTCGTTTGG	8			ACCAAAAGTTGTTTGTTTGCCTGT	1	AGGCAAACAAACAACTTTTGGTCG	5
AGAAAACCGCAGCGGATCATCTAC	5	AGATGATCCGCTGCGGTTTTCTTC	1			ACCAAAAGTTGTTCGTTTGCCTGT	33	AGGCAAACGAACAACTTTTGGTCG	3
AGAAAACCGCAACAGATCATCTGT	1	AGATGATCTGTTGCGGTTTTCTTC	2			ACCAAAAGTTGTTCGTTTGCCTGT	33	AGGCAAACGAACAACTTTTGGTTG	1
AATCATCTAAGCCCATCATCTAG	1	AGATGATGGGCTTAGATGATTAG	5			AAGGGAAAATCTATGGTTGCCTGA	1	AGGCAACCATAGATTTTCCCTTAA	1
AATCATCTAAGCCCATCATCTAG	1	AGATGATGGGCTTAGATGATTGG	2			ACAGACCTGTTATTGCCTCA	1	AGGCAATAACAGGTCTGTGA	15
ACAACGCCGATAACATCATCTCG	1	AGATGATGTTATCGGCGTTGTGA	1			AGCCCGATGGAATTGATTGCCTAA	1	AGGCAATCAATTCCATCGGGCTAC	3
ACAAGAGTCGAATGAATCATCTAG	2	AGATGATTCATTCGACTCTTGTTC	1			AGAAATATTACAGCAATTGCCTCT	4	AGGCAATTGCTGTAATATTTCTAA	66
AGAAAAAAAAAGAGTTGCATCTAC	5	AGATGCAACTCTTTTTTTTTCTTT	1			AAGTACAATCGGGGATGTGCCTTT	33	AGGCACATCCCCGATTGTACTTGA	4
AGAATAAACTCAATTGCATCTTA	1	AGATGCAATTGAGTTTATTCTGA	1			AATTGGCCGGGTCGTGCCTCC	1	AGGCACGACCCGGCCAATTAA	1
AGAATAAAACTCAATTGCATCTTA	6	AGATGCAATTGAGTTTTATTCTGA	16			ACTTATGCGCAGAGCCGTGCCTCA	1	AGGCACGGCTCTGCGCATAAGTAA	12
ACAACTCCGTACACGTGCATCTAC	1	AGATGCACGTGTACGGAGTTGTGG	2			AGCCAACGACACGTGCCTTT	1	AGGCACGTGTCGTTGGCTAA	127
AATGAGTTTATGTGATGCATCTGA	1	AGATGCATCACATAAACTCATTTG	1			AATGAGCGACCAATCAGTGCCTAC	1	AGGCACTGATTGGTCGCTCATTTG	3
AGAATTATTTTCAAGCGCATCTGC	1	AGATGCGCTTGAAAATAATTCTAC	1			AAAACATTTCTTAAAAGTGCCTAA	1	AGGCACTTTTAAGAAATGTTTTTA	1
AGAAGAATTTGAAACCGCATCTGG	5	AGATGCGGTTTCAAATTCTTCTAG	1			AAAAGATTTTCTAAAAGTGCCTAA	1	AGGCACTTTTAGAAAATCTTTTTA	11
ACCTGGTGTGGGTCCATCTCC	1	AGATGGACCCACACCAGGTTA	1			AGCCATTTGGGTTCTGCCTAT	1	AGGCAGAACCCAAATGGCTGG	69
ACATCATTTTTCATCTCCATCTAG	1	AGATGGAGATGAAAAATGATGTTT	16			ACGGAAATTTATCGATATGCCTAT	1	AGGCATATCGATAAATTTCCGTTA	2
ACATCAGTTTTCATCTCCATCTAG	2	AGATGGAGATGAAAACTGATGTTT	10			AACCCAACAGATTTTGATGCCTAA	1	AGGCATCAAAATCTGTTGGGTTAG	7
AATCAGATTATTTAGGCCATCTCC	1	AGATGGCCTAAATAATCTGATTAT	2			ACCAATTAAGGACGGGATGCCTAG	10	AGGCATCCCGTCCTTAATTGGTCC	2
ACAATTATATCCCCACCCATCTAA	1	AGATGGGTGGGGATATAATTGTCC	1			AGAAATCTCTTCCAACATGCCTCA	1	AGGCATGTTGGAAGAGATTTCTTT	17
ACCCAAACTCGTCTTACCATCTAA	1	AGATGGTAAGACGAGTTTGGGTCG	1			AACTTGTTGATTCGTAATGCCTGT	1	AGGCATTACGAATCAACAAGTTAA	1
AGAAAACCGCTGCGGACCATCTGC	1	AGATGGTCCGCAGCGGTTTTCTTC	2			AAGTACAAAGTAAAGAATGCCTAA	1	AGGCATTCTTTACTTTGTACTTCT	45
AGAAAACCGCAACGGACCATCTGC	17	AGATGGTCCGTTGCGGTTTTCTTC	5			AGCGGACGGTGAACCAATGCCTAG	2	AGGCATTGGTTCACCGTCCGCTAA	1
AGAAAACCGCAACGGACCATCTAC	3	AGATGGTCCGTTGCGGTTTTCTTC	5			AACGTCGTGTGGATTTTGGCCTAG	1	AGGCCAAAATCCACACGACGTTAT	1
ACTATGTATTGTTAGACCATCTAC	1	AGATGGTCTAACAATACATAGTCT	1			ACGAGAGAACTTATTGGCCTTT	8	AGGCCAATAAGTTCTCTCGTCA	44
AAAGTAGAGTATGAGACCATCTAC	1	AGATGGTCTCATACTCTACTTTGT	7			AACGGCATGTCTATTCTGGCCTGG	2	AGGCCAGAATAGACATGCCGTTGT	2
AGAACTAAATCTAAGACCATCTCC	7	AGATGGTCTTAGATTTAGTTCTGT	1			AAGGGAAACGCTTACTGGCCTGT	1	AGGCCAGTAAGCGTTTCCCTTGA	1
AAAAGCTGTTATGTCACCATCTTC	2	AGATGGTGACATAACAGCTTTTGC	2			ACCGTTACGTTGGAGATGGCCTTA	62	AGGCCATCTCCAACGTAACGGTAA	5
AAAAGCTGTCATGTCACCATCTAA	3	AGATGGTGACATGACAGCTTTTGG	1			ACCGTTACGTTGGAGATGGCCTAA	37	AGGCCATCTCCAACGTAACGGTAA	5
AAGGAAGGAGTACAGTACATCTTG	7	AGATGTACTGTACTCCTTCCTTAT	1			AACGAACAGCGGAACATGGCCTAA	6	AGGCCATGTTCCGCTGTTCGTTTG	1
AATCTCTAGCTCCCCTACATCTAC	2	AGATGTAGGGGAGCTAGAGATTGT	13			AGAGTATCAGTATGGGCCTAA	4	AGGCCCATACTGATACTCTCA	1
ACAAAGGCCCTACCTACATCTCC	1	AGATGTAGGTAGGGCCTTTGTGT	2			AAAGAGATTAAACTATGGGCCTAT	1	AGGCCCATAGTTTAATCTCTTTTT	1
AAAAATTTAAGCCCATACATCTAC	1	AGATGTATGGGCTTAAATTTTTAT	6			AGAAGATCTAGAAGATGGGCCTTA	22	AGGCCCATCTTCTAGATCTTCTAG	1
AGATCCACGACAGACGACATCTTC	1	AGATGTCGTCTGTCGTGGATCTAA	1			AGGAAAAATCAATTGGGGGCCTTT	3	AGGCCCCCAATTGATTTTTCCTAT	1
AACCAACGCTCCAACGACATCTAG	1	AGATGTCGTTGGAGCGTTGGTTGA	1			AACAATATACTTGAGGGGGCCTCC	2	AGGCCCCCTCAAGTATATTGTTTT	1
AAAACTTTATCCAAAGACATCTGT	1	AGATGTCTTTGGATAAAGTTTTGG	3			AATCAGCATCCATTCAGGGCCTAT	1	AGGCCCTGAATGGATGCTGATTTT	2
AGACCATCCACATTGCACATCTGA	6	AGATGTGCAATGTGGATGGTCTAA	12			AATGATCAAACAAACAGGGCCTAA	4	AGGCCCTGTTTGTTTGATCATTTG	8
AAGTAACACATAGACACATCTTA	2	AGATGTGTCTATGTGTTACTTCC	1			AATGATCAAACAAACAGGGCCTTA	1	AGGCCCTGTTTGTTTGATCATTTG	8
AATCATACACATAACATCTAG	1	AGATGTTATGTGTATGATTGA	1			AATGATCAAACAAACAGGGCCTAG	1	AGGCCCTGTTTGTTTGATCATTTG	8
ACCCCAAAATCTTTAAACATCTAA	1	AGATGTTTAAAGATTTTGGGGTCC	1			AATGATCAAACAAACAGGGCCTAT	1	AGGCCCTGTTTGTTTGATCATTTG	8
AATGACACATGTAAACATCTGA	2	AGATGTTTACATGTGTCATTCA	3			AATATCATTGTATTTTCGGCCTAA	1	AGGCCGAAAATACAATGATATTAT	1
AATGACACATGTAAACATCTGA	2	AGATGTTTACATGTGTCATTTA	1			AACCCGTAATCCCTTCAGGCCTGA	1	AGGCCTGAAGGGATTACGGGTTTC	2
AATGACACATGTAAACATCTGA	2	AGATGTTTACATGTGTCATTCC	1			AGAGAGTATCAATCAAAGGCCTAA	1	AGGCCTTTGATTGATACTCTCTCC	47
AATTTCTTTGCCTATTTAATCTTC	3	AGATTAAATAGGCAAAGAAATTAC	3			AGCCGGATGGAATTGATCGCCTAA	3	AGGCGATCAATTCCATCCGGCTAC	1
AAACAATCAGATCCGTTAATCTAA	1	AGATTAACGGATCTGATTGTTTAC	69			AAGGAGTAGTTAGACCGCCTGC	2	AGGCGGTCTAACTACTCCTTGA	1
AACGAACCATATATCTTAATCTAA	1	AGATTAAGATATATGGTTCGTTTT	2			ACCAGGAGTAGTCAGACCGCCTGC	1	AGGCGGTCTGACTACTCCTGGTAT	2
ACAGACATCGTGATGGTAATCTGC	1	AGATTACCATCACGATGTCTGTAC	6			AGGATACAATTCTTACGCCTTT	1	AGGCGTAAGAATTGTATCCTTG	1
ACTACATGCTCCGTAATCTCG	1	AGATTACGGAGCATGTAGTTA	1			ACTATTTTAATTTTGGACGCCTGA	2	AGGCGTCCAAAATTAAAATAGTTA	4
AAGAGTAGGCGGCTAGTAATCTAG	6	AGATTACTAGCCGCCTACTCTTCT	16			ACTATTTTAATTTTGGACGCCTAA	1	AGGCGTCCAAAATTAAAATAGTTA	4
ACAGACATCGTGATAGTAATCTGA	1	AGATTACTATCACGATGTCTGTAC	7			AGATAAAGGATTGCGTTAGCCTAA	3	AGGCTAACGCAATCCTTTATCTGT	2
AAAGCCGACTTAATCATAATCTTA	1	AGATTATGATTAAGTCGGCTTTGT	3			AGAAAAAACTACTGTTGAGCCTCA	1	AGGCTCAACAGTAGTTTTTTCTGA	1
AAAAGTATGAATTCAATAATCTAA	2	AGATTATTGAATTCATACTTTTAT	2			ACGGAGTTATCATTCGGAGCCTAA	1	AGGCTCCGAATGATAACTCCGTTT	2
AAAAACGTTTTCTTTTGAATCTAA	1	AGATTCAAAAGAAAACGTTTTTAC	3			AACGCAGTCACCATTCGGAGCCTCA	1	AGGCTCCGAATGGTGACTGCGTTTT	2
AATCACCGCGATTGAATCTAA	1	AGATTCAATCGCGGTGATTAC	1			AATGATCAAACAAATAGAGCCTAA	2	AGGCTCTATTTGTTTGATCATTTG	2
AAAGATATAAAATGAATCTTA	16	AGATTCATTTTATATCTTTTG	1			ACTGCTGACTTCGACAGAGCCTGG	1	AGGCTCTGTCGAAGTCAGCAGTTA	1
AACCCTATACTAGTTGGAATCTTA	1	AGATTCCAACTAGTATAGGGTTGA	1			AGAAGAAACTACCCTATCAGCCTAT	1	AGGCTGATAGGGTAGTTTCTTCTGT	2
AACCCTATACTAGTTGGAATCTCA	1	AGATTCCAACTAGTATAGGGTTGA	1			AACACTAGTTACCAATCAGCCTAT	1	AGGCTGATTGGTAACTAGTGTTAA	3
ACCATCTCTGAGTGCAGAATCTCC	5	AGATTCTGCACTCAGAGATGGTTC	11			AATAAAACAGTACGCACAGCCTAA	3	AGGCTGTGCGTACTGTTTTATTAA	5
AAAGTGCCATGCAGAATCTGT	2	AGATTCTGCATGGCACTTTGA	20			AAAGGTACAAGAAGGTAAGCCTAA	26	AGGCTTACCTTCTTGTACCTTTAT	1
ACCGTCTCTAAGAGCAGAATCTCC	2	AGATTCTGCTCTTAGAGACGGTTC	2			AAAGGTTCTGAGCGTAAGCCTGT	1	AGGCTTACGCTCAGAACCTTTTA	4
AGAAATATGGTTCTGTCAATCTGC	2	AGATTGACAGAACCATATTTCTTG	4			AAAAGGTTCTGAGCGTAAGCCTGT	2	AGGCTTACGCTCAGAACCTTTTAA	3
AATAAAAACTGAGAGTCAATCTAA	1	AGATTGACTCTCAGTTTTTATTTC	1			ACACGATCTTATAAGCCTAA	1	AGGCTTATAAGATCGTGTTG	1
ACCGATTTGCGTTTTACAATCTTA	1	AGATTGTAAAACGCAAATCGGTTT	108			AGGAGGTTCTGGGCCGAAGCCTGT	35	AGGCTTCGGCCCAGAACCTCCTGG	2
AATTCGTATCCTTACAATCTCA	1	AGATTGTAAGGATACGAATTAG	178			AGGAGGTTCTGGACCGAAGCCTCT	1	AGGCTTCGGTCCAGAACCTCCTGG	1
AAAGACATCTTCATACAATCTCC	1	AGATTGTATGAAGATGTCTTTAA	2			ACGGATTCCAAACAACAAGCCTAG	40	AGGCTTGTTGTTTGGAATCCGTAT	2
ACTTGACACGTGACACAATCTTA	2	AGATTGTGTCACGTGTCAAGTCA	1			AAGAGGTTCTGGAACAAAGCCTGA	3	AGGCTTTGTTCCAGAACCTCTTGG	1
AGAAGCTCTGATACCAAATCTTG	1	AGATTTGGTATCAGAGCTTCTTA	1			AAACATATCTTTAAGTTTCCCTTA	1	AGGGAAACTTAAAGATATGTTTGG	4
AAGGCATAACAATCTAAAATCTAT	1	AGATTTTAGATTGTTATGCCTTGG	1			ACGGACCGGGCCTAAGTTCCCTGG	3	AGGGAACTTAGGCCCGGTCCGTCG	7
AGAGAATATGCTACTAAAATCTAA	1	AGATTTTAGTAGCATATTCTCTAT	9			ACTATGCTTTTTCTCTTCCCTTA	1	AGGGAAGAGAAAAAGCATAGTTA	2
AGAACAATGAGCTACAAAATCTAA	3	AGATTTTGTAGCTCATTGTTCTTT	1			AGAAATAAGTGTTACCTTCCCTGC	1	AGGGAAGGTAACACTTATTTCTGC	2
ACCTCCTTAAACATAAAAATCTAG	1	AGATTTTTATGTTTAAGGAGGTGG	1			ACTGTTATATAGACGATTCCCTTA	2	AGGGAATCGTCTATATAACAGTTC	1
AGATGTATAGGAGGTTTTTGCTTT	1	AGCAAAAACCTCCTATACATCTTC	1			AATTTAAAACAATGTTGTCCCTGT	1	AGGGACAACATTGTTTTAAATTAT	2
ACCCTTACTATACTCTTTTGCTTT	1	AGCAAAAGAGTATAGTAAGGGTAA	1			ACCTGTGCAAATATTGTCCCTCT	1	AGGGACAATATTTGCACAGGTGA	5
AACTTTGAAGATTTTGTTTGCTCT	1	AGCAAACAAAATCTTCAAAGTTGC	1			ACGGACACGCCCAATGGTCCCTGG	1	AGGGACCATTGGGCGTGTCCGTAG	1
AAGATACAAGGTTGGGGTTGCTCT	1	AGCAACCCCAACCTTGTATCTTAG	1			AATAAGTGTTACCGTCCCTTC	1	AGGGACGGTAACACTTATTTC	13
AAGTATGGTTTTCAAAGTTGCTAA	1	AGCAACTTTGAAAACCATACTTTA	24			AGCTCGCGTTGACTACGTCCCTGC	3	AGGGACGTAGTCAACGCGAGCTGA	10
ACGTGTCTTTACCTCTATTGCTGA	1	AGCAATAGAGGTAAAGACACGTGT	2			AAAGCGTTTCCGGTAAGTCCCTCG	1	AGGGACTTACCGGAAACGCTTTAA	2
ACTGTTTGTTTTTGTCTGTGCTTT	1	AGCACAGACAAAAACAAACAGTAA	1			AAGCAACTTTGTTCTCTCCCTTT	2	AGGGAGAGAACAAAGTTGCTTGA	1
AAATCTCCTAGGTAGATGTGCTGA	3	AGCACATCTACCTAGGAGATTTAC	2			ACAAGCGGTCTGACTATCCCTAG	6	AGGGATAGTCAGACCGCTTGTAT	2
AGAGTCCAGCGTTGGGGGTGCTCT	2	AGCACCCCCAACGCTGGACTCTAT	1			AAGTCGCTACGTCAGGATCCCTTA	1	AGGGATCCTGACGTAGCGACTTGT	1
ACGTTTAAACAATGTCGGTGCTGA	3	AGCACCGACATTGTTTAAACGTAG	1			AAACAGACCATCTTCATCCCTAA	1	AGGGATGAAGATGGTCTGTTTAA	13
ACAAAATATTAATGCTCGTGCTGT	5	AGCACGAGCATTAATATTTTGTAT	1			AACTATCTGTATCATCCCTTT	1	AGGGATGATACAGATAGTTAA	2
ACAAAATATTAATGTCCGTGCTGT	3	AGCACGGACATTAATATTTTGTAT	4			AAGTCCTCGTGTTGCATCCCTCA	2	AGGGATGCAACACGAGGACTTCC	80
ACGTTTAAACAATGTCCGTGCTGA	2	AGCACGGACATTGTTTAAACGTGG	1			AAGTCCTCGTGTTGCATCCCTCA	2	AGGGATGCAACACGAGGACTTTC	2
ACAAAATATTAATGCCCGTGCTGT	2	AGCACGGGCATTAATATTTTGTAT	10			AAGTCCTCGTGTTGCATCCCTCA	2	AGGGATGCAACACGAGGACTTCT	1
AAAGATCAACCGGTTACGTGCTTT	1	AGCACGTAACCGGTTGATCTTTGA	1			AGGACATCTCCAACCCATCCCTAT	2	AGGGATGGGTTGGAGATGTCCTAA	7
ACCATTTAGGAACCGACGTGCTTA	1	AGCACGTCGGTTCCTAAATGGTTC	13			AGCTAACCACTGGAGATGCCCTAA	4	AGGGCATCTCCAGTGGTTAGCTTC	3
AAAACCGTATCGCAACAGTGCTGT	1	AGCACTGTTGCGATACGGTTTTGG	1			AATGAATAGATATTCCGGCCCTGC	2	AGGGCCGGAATATCTATTCATTGA	1
AAAAACACTACAAATCTCTGCTGT	1	AGCAGAGATTTGTAGTGTTTTTAG	6			AATCCGCTCCGTGTCCGGCCCTAA	2	AGGGCCGGACACGGAGCGGATTTC	42
AATCACGGAGGCAGGATCTGCTAT	1	AGCAGATCCTGCCTCCGTGATTTA	16			AAATTATGTTTGGACCGGCCCTAA	2	AGGGCCGGTCCAAACATAATTTGC	2
AACCAGGACGATACGATCTGCTAG	1	AGCAGATCGTATCGTCCTGGTTGC	1			AACCCGTAATCACTCCAGCCCTGA	2	AGGGCTGGAGTGATTACGGGTTTC	370
AGACTTATTTACAATGGCTGCTAC	2	AGCAGCCATTGTAAATAAGTCTTA	1			AATTTTTCAGCCACTTTCCCCTTT	1	AGGGGAAAGTGGCTGAAAAATTCA	6
ACAAAAGCTTATGGACGCTGCTGA	3	AGCAGCGTCCATAAGCTTTTGTTT	1			ACGTCTACAAAAAAGTTCCCCTAT	6	AGGGGAACTTTTTTGTAGACGTTG	1215
AAACCGGTGACAGTAGCTGCTTA	1	AGCAGCTACTGTCACCGGTTTAA	2			AGCCTCTACTTAAGGGTCCCCTGG	1	AGGGGACCCTTAAGTAGAGGCTCA	8
ACCTGTAAAAAGCTGTACTGCTAT	1	AGCAGTACAGCTTTTTACAGGTTT	2			AACGACACTTGGTTATCCCCTGA	1	AGGGGATAACCAAGTGTCGTTAG	4
AAGAGTGAGAAGTCTACTGCTAG	1	AGCAGTAGACTTCTCACTCTTAA	7			AGAGAAGATTAGCATGGCCCCTGC	1	AGGGGCCATGCTAATCTTCTCTGT	6
AATCTCAACCCGGTTCACTGCTTT	1	AGCAGTGAACCGGGTTGAGATTAG	5			ACATACACTGTGGAAGCCCCCTTG	2	AGGGGGCTTCCACAGTGTATGTGT	1
AATTACAAGGAATGTCACTGCTAC	1	AGCAGTGACATTCCTTGTAATTAC	2			AAGTGTTAACGTCCATACCCCTAA	1	AGGGGTATGGACGTTAACACTTAT	1
AAATGACCGCTACACTGCTTA	11	AGCAGTGTAGCGGTCATTTAA	12			ACAGGCTCATTTTGACACCCCTAA	1	AGGGGTGTCAAAATGAGCCTGTTC	1
AAGCTAACTTGATCTAACTGCTAC	2	AGCAGTTAGATCAAGTTAGCTTTT	7			AAACCCTTAACCCTTAACCCCTAA	1	AGGGGTTAAGGGTTAAGGGTTTAG	1
AACTGAACCGATACGAACTGCTGC	1	AGCAGTTCGTATCGGTTCAGTTGA	1			AACAAAATGACCATATTACCCTCA	1	AGGGTAATATGGTCATTTTGTTCA	1
ACAAAAACATCATTTGTATGCTTC	4	AGCATACAAATGATGTTTTTGTTT	4			AGAATGACCAAATTACCCTCA	2	AGGGTAATTTGGTCATTCTGT	1
AGATTTTGACCCGCGGTATGCTAG	11	AGCATACCGCGGGTCAAAATCTAG	2			ACAGAATGACCAAATTACCCTCA	9	AGGGTAATTTGGTCATTCTGTTA	2
ACTGGATGTGGTCGAGTATGCTGA	1	AGCATACTCGACCACATCCAGTGT	1			ACAGAATGACCAAATTACCCTCA	9	AGGGTAATTTGGTCATTCTGTTC	1
ACGGAAATTTATTGATATGCTTA	1	AGCATATCAATAAATTTCCGTTA	1			ACAGAATGACCAAATTACCCTCA	9	AGGGTAATTTGGTCATTCTGTTT	1
AATTAAGTACTGATGATGCTGA	8	AGCATCATCAGTACTTAATTTC	1			AACAGAATGACCAAATTACCCTCA	7	AGGGTAATTTGGTCATTCTGTTCA	4
AACCGAACTCCAAGATGATGCTAT	1	AGCATCATCTTGGAGTTCGGTTCG	1			AACAGAATGACCAAATTACCCTCA	7	AGGGTAATTTGGTCATTCTGTTAA	1
ACTACTGATGGAGATGCTCT	1	AGCATCTCCATCAGTAGTCT	1			ACAAAATGACCAAATTACCCTCA	2	AGGGTAATTTGGTCATTTTGTTA	1
AGAGACTACTCATGGAGATGCTCT	1	AGCATCTCCATGAGTAGTCTCTCA	1			ACAAAATGACCAAATTACCCTCA	2	AGGGTAATTTGGTCATTTTGTTC	1
AATGAAAGATTTAGGAGATGCTAG	2	AGCATCTCCTAAATCTTTCATTTC	2			AACAAAATGACCAAATTACCCTCA	2	AGGGTAATTTGGTCATTTTGTTAA	1
AGAGACCACCGTTGCAGATGCTCT	1	AGCATCTGCAACGGTGGTCTCTAT	1			AACAAAATGACCAAATTACCCTCA	2	AGGGTAATTTGGTCATTTTGTTCA	1
AATAGATAGTCTAAGTCATGCTTA	2	AGCATGACTTAGACTATCTATTTT	26			AACAGAATAACCAAATTACCCTCA	1	AGGGTAATTTGGTTATTCTGTTCA	1
AAGAGATCTTTTCCAGCATGCTTC	1	AGCATGCTGGAAAAGATCTCTTGT	1			ACCAGCTATGTAGGAATACCCTAT	2	AGGGTATTCCTACATAGCTGGTGG	1
ACGGAAACTTAACGACATGCTTA	13	AGCATGTCGTTAAGTTTCCGTTA	4			ACCCTTTTGCAACAATACCCTTA	1	AGGGTATTGTTGCAAAAGGGTAG	2
AACGGAAACTTAACGACATGCTTA	36	AGCATGTCGTTAAGTTTCCGTTAA	1			AGAAGATGAAGCTTGTGACCCTAA	1	AGGGTCACAAGCTTCATCTTCTAG	1
AGATTTGATGTAATTTAATGCTTA	1	AGCATTAAATTACATCAAATCTTT	1			AAGCAGCAAAAATTGGACCCTAA	1	AGGGTCCAATTTTTGCTGCTTTG	1
AAGGAACAAAATAAGGAATGCTTC	14	AGCATTCCTTATTTTGTTCCTTCT	1			ACGCAATCACCATTCGGACCCTAA	7	AGGGTCCGAATGGTGATTGCGTTT	1
AAAACTACATCGCAACAATGCTGT	1	AGCATTGTTGCGATGTAGTTTTGA	3			AAAGCAGCAAACCAGAGACCCTAA	2	AGGGTCTCTGGTTTGCTGCTTTGT	1
AATCTCATTCACAGAAAATGCTTT	1	AGCATTTTCTGTGAATGAGATTGA	1			AAAGCAGCAAAACAGAGACCCTAA	19	AGGGTCTCTGTTTTGCTGCTTTGT	2
AATTTGTGTGTCGAATTTGGCTAG	1	AGCCAAATTCGACACACAAATTAG	1			AAGAATTTACAAGAAGACCCTTT	1	AGGGTCTTCTTGTAAATTCTTTA	3
ACAATACCCTTTTCCGTTGGCTAT	1	AGCCAACGGAAAAGGGTATTGTTG	3			AAAGAATTTACAAGAAGACCCTTT	2	AGGGTCTTCTTGTAAATTCTTTAA	1
AAGCGTCCGGCATAGTTGGCTAA	1	AGCCAACTATGCCGGACGCTTAT	1			ACTATTTTGCCAACACACCCTAA	1	AGGGTGTGTTGGCAAAATAGTCA	4
AAGAAGACGATACAAGTTGGCTCT	58	AGCCAACTTGTATCGTCTTCTTTT	8			AAAGTGCAAAATCTTGAACCCTAC	1	AGGGTTCAAGATTTTGCACTTTGC	1
ACGTCGCTATGAACGCTTGGCTGC	1	AGCCAAGCGTTCATAGCGACGTTG	2			AAACAAATCCATCGGAACCCTAA	3	AGGGTTCCGATGGATTTGTTTAA	1
AAAAACTTTCCTCATATTGGCTTC	1	AGCCAATATGAGGAAAGTTTTTAA	2			AAGTACAGAAAACTAAACCCTAA	1	AGGGTTTAGTTTTCTGTACTTAT	2
AACGATGTGCCTTAATTGGCTTA	1	AGCCAATTAAGGCACATCGTTAG	1			AAGATGCATAACAATAAACCCTCA	9	AGGGTTTATTGTTATGCATCTTGA	10
ACCAGTATCATCTGACGTGGCTTC	1	AGCCACGTCAGATGATACTGGTAT	8			AAACCCTAATCAATGAAACCCTAT	1	AGGGTTTCATTGATTAGGGTTTTC	2
ACCAATATCATCTGACGTGGCTTC	7	AGCCACGTCAGATGATATTGGTAT	1			AACAAGATCAGAAAGAAACCCTCC	1	AGGGTTTCTTTCTGATCTTGTTGT	3
AATATTTTCGTTTGATCTGGCTAA	3	AGCCAGATCAAACGAAAATATTAT	1			AAGATGCATAACAACAAACCCTCA	1	AGGGTTTGTTGTTATGCATCTTGA	1
[truncated: 25,830 more rows]

## Sheet: Table S3
Table S3. Expression profiles of conserved miRNAs that at least hit 50 reads in one sample.
miRNA_id	miRNA_sequence	Col-0 Reads	RPM	V592-infected Reads	RPM
miR158a-3p	UCCCAAAUGUAGACAAAGCA	68979	5477.81	89993	8350.03
miR157a-5p	UUGACAGAAGAUAGAGAGCAC	66685	5295.64	76682	7114.96
miR156a-5p	UGACAGAAGAGAGUGAGCAC	40174	3190.33	70181	6511.77
miR166a-3p	UCGGACCAGGCUUCAUUCCCC	38987	3096.07	76580	7105.5
miR165a-3p	UCGGACCAGGCUUCAUCCCCC	12854	1020.77	24369	2261.09
miR167a-5p	UGAAGCUGCCAGCAUGAUCUA	9283	737.189	17152	1591.45
miR168a-5p	UCGCUUGGUGCAGGUCGGGAA	9069	720.194	9969	924.977
miR173-5p	UUCGCUUGCAGAGAGAAAUCAC	6882	546.519	4892	453.906
miR822-5p	UGCGGGAAGCAUUUGCACAUG	2522	200.279	3390	314.542
miR829-3p.1	AGCUCUGAUACCAAAUGAUGGAAU	2494	198.055	5616	521.082
miR172a	AGAAUCUUGAUGAUGCUGCAU	1934	153.584	2108	195.591
miR164a	UGGAGAAGCAGGGCACGUGCA	1871	148.581	1925	178.612
miR161.2	UCAAUGCAUUGAAAGUGACUA	1829	145.246	2249	208.674
miR869.2	UCUGGUGUUGAGAUAGUUGAC	1633	129.681	2144	198.932
miR171c-5p	AGAUAUUGGUGCGGUUCAAUC	1039	82.5099	78	7.23725
miR156h	UGACAGAAGAAAGAGAGCAC	1027	81.5569	512	47.5061
miR157d	UGACAGAAGAUAGAGAGCAC	885	70.2803	1618	150.127
miR157a-3p	GCUCUCUAGCCUUCUGUCAUC	874	69.4068	2027	188.076
miR5642a	UCUCGCGCUUGUACGGCUUU	829	65.8332	451	41.8462
miR158b	CCCCAAAUGUAGACAAAGCA	701	55.6684	757	70.2385
miR408-5p	ACAGGGAACAAGCAGAGCAUG	657	52.1742	1349	125.167
miR824-5p	UAGACCAUUUGUGAGAAGGGA	646	51.3007	611	56.6918
miR156g	CGACAGAAGAGAGUGAGCAC	477	37.8799	211	19.5777
miR160a-3p	GCGUAUGAGGAGCCAUGCAUA	475	37.7211	2752	255.345
miR403-3p	UUAGAUUCACGCACAAACUCG	469	37.2446	493	45.7432
miR472-5p	AUGGUCGAAGUAGGCAAAAUC	451	35.8152	523	48.5267
miR169a-5p	CAGCCAAGGAUGACUUGCCGA	426	33.8298	342	31.7326
miR390a-5p	AAGCUCAGGAGGGAUAGCGCC	381	30.2563	927	86.012
miR159a	UUUGGAUUGAAGGGAGCUCUA	341	27.0798	1187	110.136
miR168a-3p	CCCGCCUUGCAUCAACUGAAU	333	26.4445	118	10.9487
miR396a-5p	UUCCACAGCUUUCUUGAACUG	316	25.0944	208	19.2993
miR162a-3p	UCGAUAAACCUCUGCAUCCAG	279	22.1562	535	49.6401
miR824-3p	CCUUCUCAUCGAUGGUCUAGA	195	15.4855	178	16.5158
miR837-3p	AAACGAACAAAAAACUGAUGG	193	15.3267	823	76.3623
miR164c-5p	UGGAGAAGCAGGGCACGUGCG	189	15.009	785	72.8365
miR775	UUCGAUGUCUAGCAGUGCCA	183	14.5325	120	11.1342
miR163	UUGAAGAGGACUUGGAACUUCGAU	182	14.4531	864	80.1665
miR169d	UGAGCCAAGGAUGACUUGCCG	169	13.4208	368	34.145
miR8175	GAUCCCCGGCAACGGCGCCA	141	11.1972	912	84.6202
miR165a-5p	GGAAUGUUGUCUGGAUCGAGG	140	11.1178	193	17.9076
miR172c	AGAAUCUUGAUGAUGCUGCAG	138	10.959	68	6.3094
miR408-3p	AUGCACUGCCUCUUCCCUGGC	134	10.6413	162	15.0312
miR169b-5p	CAGCCAAGGAUGACUUGCCGG	132	10.4825	120	11.1342
miR396b-5p	UUCCACAGCUUUCUUGAACUU	127	10.0854	159	14.7529
miR5026	ACUCAUAAGAUCGUGACACGU	125	9.9266	241	22.3613
miR846-5p	CAUUCAAGGACUUCUAUUCAG	125	9.9266	55	5.10319
miR172e-3p	GGAAUCUUGAUGAUGCUGCAU	106	8.41775	102	9.4641
miR846-3p	UUGAAUUGAAGUGCUUGAAUU	105	8.33834	183	16.9797
miR161.1	UGAAAGUGACUACAUCGGGGU	103	8.17952	182	16.8869
miR156j	UGACAGAAGAGAGAGAGCAC	101	8.02069	40	3.71141
miR160c-3p	CGUACAAGGAGUCAAGCAUGA	100	7.94128	80	7.42283
miR860	UCAAUAGAUUGGACUAUGUAU	95	7.54421	104	9.64967
miR823	UGGGUGGUGAUCAUAUAAGAU	95	7.54421	79	7.33004
miR400	UAUGAGAGUAUUAUAAGUCAC	81	6.43243	62	5.75269
miR5659	CGAUGAAGGUCUUUGGAACGGUA	75	5.95596	80	7.42283
miR829-5p	ACUUUGAAGCUUUGAUUUGAA	71	5.63831	145	13.4539
miR156b-3p	UGCUCACCUCUCUUUCUGUCAGU	71	5.63831	115	10.6703
miR397b	UCAUUGAGUGCAUCGUUGAUG	69	5.47948	75	6.9589
miR169h	UAGCCAAGGAUGACUUGCCUG	67	5.32066	59	5.47433
miR396b-3p	GCUCAAGAAAGCUGUGGGAAA	64	5.08242	95	8.81461
miR848	UGACAUGGGACUGCCUAAGCUA	64	5.08242	74	6.86611
miR167c-5p	UAAGCUGCCAGCAUGAUCUUG	63	5.003	136	12.6188
miR166e-5p	GGAAUGUUGUCUGGCACGAGG	62	4.92359	90	8.35068
miR166a-5p	GGACUGUUGUCUGGCUCGAGG	59	4.68535	117	10.8559
miR1886.2	UGAGAUGAAAUCUUUGAUUGG	59	4.68535	72	6.68054
miR396a-3p	GUUCAAUAAAGCUGUGGGAAG	56	4.44712	48	4.4537
miR842	UCAUGGUCAGAUCCGUCAUCC	56	4.44712	42	3.89698
miR160a-5p	UGCCUGGCUCCCUGUAUGCCA	54	4.28829	398	36.9286
miR173-3p	UGAUUCUCUGUGUAAGCGAAA	49	3.89123	64	5.93826
miR159b-3p	UUUGGAUUGAAGGGAGCUCUU	43	3.41475	176	16.3302
miR5648-3p	AUCUGAAGAAAAUAGCGGCAU	28	2.22356	59	5.47433
miR5653	UGGGUUGAGUUGAGUUGAGUUGGC	23	1.82649	71	6.58776
miR391-5p	UUCGCAGGAGAGAUAGCGCCA	6	0.476477	52	4.82484

## Sheet: Table S4
Table S4. The target genes of altered miRNAs were categorized into different GO.
GO_acc	term_type	Term	pvalue	FDR	entries
GO:0032504	P	multicellular organism reproduction	9.3e-06	8.7e-05	// AT5G06100.3 // AT5G06100.2 // AT5G06100.1 // AT3G11440.1 // AT3G60460.1
GO:0048508	P	embryonic meristem development	8.8e-10	1.4e-08	// AT5G53950.1 // AT2G34710.1 // AT4G32880.1 // AT1G56010.1 // AT1G56010.2 // AT3G15170.1 // AT1G30490.1
GO:0044424	C	intracellular part	8.8e-07	1.1e-05	// AT1G01040.1 // AT1G52150.1 // AT1G52150.3 // AT1G52150.2 // AT5G60690.1 // AT3G15270.1 // AT5G58610.1 // AT5G06510.2 // AT5G06510.3 // AT3G05690.1 // AT4G28660.1 // AT5G35630.1 // AT5G50570.1 // AT5G50570.2 // AT1G63130.1 // AT4G00850.1 // AT2G47020.1 // AT2G47020.2 // AT5G43270.2 // AT5G43270.3 // AT5G43270.1 // AT4G35080.1 // AT5G60370.1 // AT4G35080.2 // AT5G06100.3 // AT5G06100.2 // AT5G06…
GO:0007276	P	gamete generation	8.7e-07	1e-05	// AT5G06100.3 // AT5G06100.2 // AT5G06100.1 // AT3G11440.1 // AT3G60460.1
GO:0003002	P	regionalization	8.3e-07	9.7e-06	// AT5G53950.1 // AT1G52150.1 // AT2G34710.1 // AT1G52150.3 // AT1G52150.2 // AT5G60690.1 // AT3G15170.1 // AT1G30490.1
GO:0048509	P	regulation of meristem development	8.3e-07	9.7e-06	// AT1G52150.1 // AT1G52150.3 // AT1G52150.2 // AT5G12840.4 // AT5G12840.3 // AT5G12840.2 // AT5G12840.1
GO:0048528	P	post-embryonic root development	8.3e-05	0.00067	// AT1G56010.1 // AT5G18560.1 // AT3G15170.1 // AT1G56010.2 // AT2G42430.1
GO:0048316	P	seed development	7.9e-06	7.5e-05	// AT5G53950.1 // AT2G41720.1 // AT2G34710.1 // AT2G41720.2 // AT4G32880.1 // AT1G56010.1 // AT1G56010.2 // AT1G30490.1 // AT2G04842.1 // AT3G15170.1 // AT5G12840.4 // AT5G12840.3 // AT5G12840.2 // AT5G12840.1
GO:0010016	P	shoot morphogenesis	7.7e-10	1.3e-08	// AT5G64630.1 // AT5G64630.3 // AT5G53950.1 // AT1G52150.1 // AT2G34710.1 // AT1G52150.3 // AT1G52150.2 // AT4G32880.1 // AT1G56010.1 // AT1G56010.2 // AT5G64630.2 // AT3G15170.1 // AT1G30490.1
GO:0009059	P	macromolecule biosynthetic process	7.6e-13	1.7e-11	// AT2G26950.1 // AT1G52150.1 // AT1G52150.3 // AT1G52150.2 // AT5G60690.1 // AT5G18560.1 // AT3G11440.1 // ATCG00880.1 // AT3G15270.1 // AT5G12840.4 // AT5G58610.1 // AT5G06510.2 // AT5G06510.3 // AT3G05690.1 // AT4G32880.1 // AT1G49475.1 // AT3G60460.1 // AT5G06510.1 // AT1G69170.1 // ATCG01260.1 // AT5G50570.1 // AT1G30490.1 // AT5G50570.2 // AT5G12840.3 // AT1G27360.2 // AT5G12840.1 // AT5G37…
GO:0009653	P	anatomical structure morphogenesis	7.3e-07	8.8e-06	// AT5G64630.1 // AT5G64630.3 // AT5G53950.1 // AT1G52150.1 // AT2G34710.1 // AT1G52150.3 // AT1G52150.2 // AT4G32880.1 // AT5G60690.1 // AT5G18560.1 // AT1G56010.1 // AT1G56010.2 // AT1G30490.1 // AT1G77850.1 // AT5G64630.2 // AT3G15170.1 // AT2G42430.1
GO:0010647	P	positive regulation of cell communication	7.3e-07	8.8e-06	// AT5G06100.3 // AT5G06100.2 // AT5G06100.1 // AT2G32460.2 // AT2G32460.1
GO:0043227	C	membrane-bounded organelle	7.2e-09	1.9e-07	// AT1G01040.1 // AT3G23890.1 // AT1G52150.1 // AT1G52150.3 // AT1G52150.2 // AT1G79750.1 // AT5G60690.1 // AT5G19950.3 // AT3G11440.1 // AT3G06483.1 // AT2G45990.1 // AT4G15530.2 // AT5G50670.1 // ATCG00880.1 // AT3G15270.1 // AT1G52590.1 // AT5G48600.1 // AT5G58610.1 // AT5G06510.2 // AT5G06510.3 // AT5G24810.1 // AT4G15530.5 // AT4G15530.4 // AT4G15530.3 // AT3G05690.1 // AT4G15530.1 // AT4G32…
GO:0048437	P	floral organ development	6e-05	0.00049	// AT1G52150.1 // AT2G34710.1 // AT1G52150.3 // AT1G52150.2 // AT2G28350.1 // AT2G02850.1 // AT1G30490.1
GO:0043231	C	intracellular membrane-bounded organelle	6.9e-09	1.9e-07	// AT1G01040.1 // AT3G23890.1 // AT1G52150.1 // AT1G52150.3 // AT1G52150.2 // AT1G79750.1 // AT5G60690.1 // AT5G19950.3 // AT3G11440.1 // AT3G06483.1 // AT2G45990.1 // AT4G15530.2 // AT5G50670.1 // ATCG00880.1 // AT3G15270.1 // AT1G52590.1 // AT5G48600.1 // AT5G58610.1 // AT5G06510.2 // AT5G06510.3 // AT5G24810.1 // AT4G15530.5 // AT4G15530.4 // AT4G15530.3 // AT3G05690.1 // AT4G15530.1 // AT4G32…
GO:0051716	P	cellular response to stimulus	6.9e-06	6.6e-05	// AT5G64630.1 // AT1G01040.1 // AT5G64630.2 // AT4G31150.2 // AT4G31150.1 // AT2G32460.1 // AT1G52500.2 // AT1G52500.1 // AT3G11440.1 // AT1G56010.2 // AT1G56010.1 // AT1G77850.1 // AT5G06100.3 // AT2G32460.2 // AT2G28350.1 // AT5G06100.2 // AT5G06100.1 // AT5G64630.3
GO:0008757	F	S-adenosylmethionine-dependent methyltransferase activity	6.8e-07	1.3e-05	// AT5G15810.1 // AT3G44870.1 // AT1G15125.1 // AT1G66700.3 // AT1G66700.1 // AT1G66720.1 // AT1G66690.1 // AT3G02320.1
GO:0008168	F	methyltransferase activity	6.7e-05	0.0011	// AT5G15810.1 // AT3G44870.1 // AT1G15125.1 // AT1G66700.3 // AT1G66700.1 // AT1G66720.1 // AT1G66690.1 // AT3G02320.1 // AT3G15530.2
GO:0060255	P	regulation of macromolecule metabolic process	6.6e-24	2.7e-21	// AT2G26950.1 // AT1G01040.1 // AT1G52150.1 // AT1G52150.3 // AT1G52150.2 // AT5G60690.1 // AT5G18560.1 // AT3G11440.1 // AT3G15270.1 // AT5G12840.4 // AT5G58610.1 // AT5G06510.2 // AT5G06510.3 // AT3G17185.2 // AT3G05690.1 // AT3G17185.1 // AT4G32880.1 // AT1G49475.1 // AT3G60460.1 // AT5G06510.1 // AT1G69170.1 // AT5G50570.1 // AT1G30490.1 // AT5G50570.2 // AT5G12840.3 // AT1G27360.2 // AT5G12…
GO:0048609	P	reproductive process in a multicellular organism	6.6e-06	6.4e-05	// AT5G06100.3 // AT5G06100.2 // AT5G06100.1 // AT3G11440.1 // AT3G60460.1
GO:0048569	P	post-embryonic organ development	6.5e-05	0.00053	// AT1G52150.1 // AT2G34710.1 // AT1G52150.3 // AT1G52150.2 // AT2G28350.1 // AT2G02850.1 // AT1G30490.1
GO:0080060	P	integument development	6.3e-09	9.8e-08	// AT1G30490.1 // AT1G52150.1 // AT2G34710.1 // AT1G52150.3 // AT1G52150.2
GO:0080090	P	regulation of primary metabolic process	5.9e-22	4.4e-20	// AT2G26950.1 // AT1G52150.1 // AT1G52150.3 // AT1G52150.2 // AT5G60690.1 // AT5G18560.1 // AT3G11440.1 // AT3G15270.1 // AT5G12840.4 // AT5G58610.1 // AT5G06510.2 // AT5G06510.3 // AT3G05690.1 // AT4G32880.1 // AT1G49475.1 // AT3G60460.1 // AT5G06510.1 // AT1G69170.1 // AT5G50570.1 // AT1G30490.1 // AT5G50570.2 // AT5G12840.3 // AT1G27360.2 // AT5G12840.1 // AT5G37020.1 // AT5G37020.2 // AT2G34…
GO:0050793	P	regulation of developmental process	5.9e-06	5.9e-05	// AT2G33810.1 // AT1G52150.1 // AT1G52150.3 // AT1G52150.2 // AT4G32880.1 // AT1G53160.1 // AT5G53950.1 // AT3G15270.1 // AT5G12840.4 // AT5G12840.3 // AT5G12840.2 // AT5G12840.1
GO:0009555	P	pollen development	5.9e-06	5.9e-05	// AT5G64630.1 // AT5G64630.3 // AT5G64630.2 // AT3G60460.1 // AT3G11440.1 // AT5G06100.3 // AT5G06100.2 // AT5G06100.1
GO:0048584	P	positive regulation of response to stimulus	5.9e-05	0.00049	// AT5G06100.3 // AT5G06100.2 // AT5G06100.1 // AT2G32460.2 // AT2G32460.1
GO:0048527	P	lateral root development	5.9e-05	0.00049	// AT1G56010.1 // AT5G18560.1 // AT3G15170.1 // AT1G56010.2 // AT2G42430.1
GO:0003676	F	nucleic acid binding	5.8e-20	2.2e-18	// AT2G26950.1 // AT4G30080.1 // AT1G01040.1 // AT3G23890.1 // AT1G52150.1 // AT1G52150.3 // AT1G52150.2 // AT5G60690.1 // AT5G18560.1 // AT3G61310.1 // AT5G07680.1 // AT5G50670.1 // AT3G57920.1 // AT3G15270.1 // AT5G12840.4 // AT3G12977.1 // AT5G58610.1 // AT5G06510.2 // AT5G06510.3 // AT2G41690.1 // AT3G05690.1 // AT3G07740.1 // AT5G61430.1 // AT1G49475.1 // AT3G60460.1 // AT1G56010.1 // AT1G56…
GO:0034645	P	cellular macromolecule biosynthetic process	5.8e-13	1.3e-11	// AT2G26950.1 // AT1G52150.1 // AT1G52150.3 // AT1G52150.2 // AT5G60690.1 // AT5G18560.1 // AT3G11440.1 // ATCG00880.1 // AT3G15270.1 // AT5G12840.4 // AT5G58610.1 // AT5G06510.2 // AT5G06510.3 // AT3G05690.1 // AT4G32880.1 // AT1G49475.1 // AT3G60460.1 // AT5G06510.1 // AT1G69170.1 // ATCG01260.1 // AT5G50570.1 // AT1G30490.1 // AT5G50570.2 // AT5G12840.3 // AT1G27360.2 // AT5G12840.1 // AT5G37…
GO:0003677	F	DNA binding	5.7e-28	2.9e-26	// AT2G26950.1 // AT3G61310.1 // AT3G23890.1 // AT1G52150.1 // AT1G52150.3 // AT1G52150.2 // AT5G60690.1 // AT5G18560.1 // AT3G11440.1 // AT5G07680.1 // AT5G50670.1 // AT3G15270.1 // AT5G12840.4 // AT3G12977.1 // AT5G58610.1 // AT5G06510.2 // AT5G06510.3 // AT2G41690.1 // AT3G05690.1 // AT3G07740.1 // AT5G61430.1 // AT1G49475.1 // AT3G60460.1 // AT1G56010.1 // AT1G56010.2 // AT5G06510.1 // AT5G55…
GO:0048507	P	meristem development	5.5e-17	2.1e-15	// AT5G64630.1 // AT5G64630.3 // AT5G53950.1 // AT1G52150.1 // AT2G34710.1 // AT1G52150.3 // AT1G52150.2 // AT4G32880.1 // AT5G60690.1 // AT1G56010.1 // AT1G56010.2 // AT1G30490.1 // AT5G64630.2 // AT3G15170.1 // AT5G12840.4 // AT5G12840.3 // AT5G12840.2 // AT5G12840.1
GO:0051252	P	regulation of RNA metabolic process	5.5e-14	1.5e-12	// AT1G52150.1 // AT1G52150.3 // AT1G52150.2 // AT5G60690.1 // AT5G18560.1 // AT5G06510.1 // AT5G06510.2 // AT5G06510.3 // AT3G05690.1 // AT4G32880.1 // AT1G49475.1 // AT3G60460.1 // AT5G58610.1 // AT5G12840.4 // AT5G12840.3 // AT5G12840.2 // AT5G12840.1 // AT5G37020.1 // AT5G37020.2 // AT2G34710.1 // AT2G28350.1 // AT2G32460.2 // AT1G30490.1 // AT1G30330.1 // AT3G61740.1 // AT3G61740.2 // AT1G30…
GO:0031981	C	nuclear lumen	5.5e-06	5.5e-05	// AT1G01040.1 // AT3G05690.1 // AT2G28510.1 // AT3G20910.1 // AT5G12840.2 // AT4G12080.1 // AT5G12840.1 // AT5G12840.4 // AT5G12840.3 // AT5G06510.1 // AT5G06510.2 // AT5G06510.3
GO:0030528	F	transcription regulator activity	5.3e-28	2.9e-26	// AT2G26950.1 // AT1G52150.1 // AT1G52150.3 // AT1G52150.2 // AT5G60690.1 // AT5G18560.1 // AT3G11440.1 // AT5G07680.1 // AT3G15270.1 // AT5G12840.4 // AT5G06510.1 // AT5G06510.2 // AT5G06510.3 // AT2G41690.1 // AT3G05690.1 // AT3G07740.1 // AT5G61430.1 // AT1G49475.1 // AT3G60460.1 // AT1G56010.1 // AT1G56010.2 // AT1G30490.1 // AT5G55020.1 // AT3G07740.2 // AT3G07740.3 // AT5G50570.1 // AT3G57…
GO:0009933	P	meristem structural organization	5.3e-18	2.4e-16	// AT5G64630.1 // AT5G64630.3 // AT5G53950.1 // AT1G52150.1 // AT2G34710.1 // AT1G52150.3 // AT1G52150.2 // AT4G32880.1 // AT5G60690.1 // AT1G56010.1 // AT1G56010.2 // AT5G64630.2 // AT3G15170.1 // AT1G30490.1
GO:0009725	P	response to hormone stimulus	5.1e-05	0.00043	// AT1G30330.1 // AT5G37020.1 // AT5G37020.2 // AT1G30330.2 // AT2G32460.1 // AT4G32880.1 // AT3G11440.1 // AT1G56010.2 // AT1G56010.1 // AT1G77850.1 // AT5G06100.3 // AT2G32460.2 // AT1G54990.1 // AT2G47750.1 // AT2G28350.1 // AT5G06100.2 // AT5G06100.1 // AT4G30080.1
GO:0031323	P	regulation of cellular metabolic process	4e-21	2.5e-19	// AT2G26950.1 // AT1G52150.1 // AT1G52150.3 // AT1G52150.2 // AT5G60690.1 // AT5G18560.1 // AT3G11440.1 // AT3G15270.1 // AT5G12840.4 // AT5G58610.1 // AT5G06510.2 // AT5G06510.3 // AT3G05690.1 // AT4G32880.1 // AT1G49475.1 // AT3G60460.1 // AT5G06510.1 // AT1G69170.1 // AT5G50570.1 // AT1G30490.1 // AT5G50570.2 // AT5G12840.3 // AT1G27360.2 // AT5G12840.1 // AT5G37020.1 // AT5G37020.2 // AT2G34…
GO:0009791	P	post-embryonic development	4e-17	1.6e-15	// AT1G01040.1 // AT1G52150.1 // AT2G02850.1 // AT1G52150.3 // AT1G52150.2 // AT5G18560.1 // AT3G15270.1 // AT2G41720.1 // AT2G41720.2 // AT4G32880.1 // AT1G56010.1 // AT1G56010.2 // AT1G30490.1 // AT5G12840.4 // AT5G12840.3 // AT5G12840.2 // AT5G12840.1 // AT5G37020.1 // AT5G37020.2 // AT5G53950.1 // AT2G34710.1 // AT2G33810.1 // AT2G04842.1 // AT2G42200.1 // AT2G42430.1 // AT1G30330.1 // AT1G30…
GO:0009967	P	positive regulation of signal transduction	4e-07	5e-06	// AT5G06100.3 // AT5G06100.2 // AT5G06100.1 // AT2G32460.2 // AT2G32460.1
GO:0005622	C	intracellular	4.9e-06	5.4e-05	// AT1G01040.1 // AT1G52150.1 // AT1G52150.3 // AT1G52150.2 // AT5G60690.1 // AT3G15270.1 // AT5G58610.1 // AT5G06510.2 // AT5G06510.3 // AT3G05690.1 // AT4G28660.1 // AT5G35630.1 // AT5G50570.1 // AT5G50570.2 // AT1G63130.1 // AT4G00850.1 // AT2G47020.1 // AT2G47020.2 // AT5G43270.2 // AT5G43270.3 // AT5G43270.1 // AT4G35080.1 // AT5G60370.1 // AT4G35080.2 // AT5G06100.3 // AT5G06100.2 // AT5G06…
GO:0055046	P	microgametogenesis	4.8e-08	6.7e-07	// AT5G06100.3 // AT5G06100.2 // AT5G06100.1 // AT3G11440.1 // AT3G60460.1
GO:0048235	P	pollen sperm cell differentiation	4.8e-08	6.7e-07	// AT5G06100.3 // AT5G06100.2 // AT5G06100.1 // AT3G11440.1 // AT3G60460.1
GO:0003700	F	transcription factor activity	4.7e-29	7.1e-27	// AT2G26950.1 // AT1G52150.1 // AT1G52150.3 // AT1G52150.2 // AT5G60690.1 // AT5G18560.1 // AT3G11440.1 // AT5G07680.1 // AT3G15270.1 // AT5G12840.4 // AT5G06510.1 // AT5G06510.2 // AT5G06510.3 // AT2G41690.1 // AT3G05690.1 // AT3G07740.1 // AT5G61430.1 // AT1G49475.1 // AT3G60460.1 // AT1G56010.1 // AT1G56010.2 // AT1G30490.1 // AT5G55020.1 // AT3G07740.2 // AT3G07740.3 // AT5G50570.1 // AT3G57…
GO:0050794	P	regulation of cellular process	4.7e-15	1.5e-13	// AT2G26950.1 // AT1G52150.1 // AT1G52150.3 // AT1G52150.2 // AT5G60690.1 // AT2G21840.1 // AT3G11440.1 // AT3G15270.1 // AT5G12840.4 // AT5G58610.1 // AT5G06510.2 // AT5G06510.3 // AT3G05690.1 // AT4G32880.1 // AT1G49475.1 // AT3G60460.1 // AT1G56010.1 // AT1G56010.2 // AT5G06510.1 // AT1G69170.1 // AT5G50570.1 // AT3G43740.1 // AT1G30490.1 // AT5G50570.2 // AT5G12840.3 // AT1G27360.2 // AT5G12…
GO:0009855	P	determination of bilateral symmetry	4.5e-11	8.3e-10	// AT1G52150.1 // AT2G34710.1 // AT1G52150.3 // AT1G52150.2 // AT5G60690.1 // AT1G30490.1
GO:0048366	P	leaf development	4.5e-08	6.5e-07	// AT5G64630.1 // AT5G64630.3 // AT5G53950.1 // AT1G52150.1 // AT1G52150.3 // AT4G00850.1 // AT1G52150.2 // AT3G17185.1 // AT5G64630.2 // AT1G01160.1 // AT2G28350.1 // AT3G17185.2
GO:0044249	P	cellular biosynthetic process	4.4e-09	7e-08	// AT2G26950.1 // AT1G52150.1 // AT1G52150.3 // AT1G52150.2 // AT1G79750.1 // AT5G60690.1 // AT5G18560.1 // AT3G11440.1 // ATCG00880.1 // AT3G15270.1 // AT5G12840.4 // AT5G58610.1 // AT5G06510.2 // AT5G06510.3 // AT3G05690.1 // AT4G32880.1 // AT1G49475.1 // AT3G60460.1 // AT5G06510.1 // AT1G17000.1 // ATCG01260.1 // AT5G50570.1 // AT1G69170.1 // AT5G50570.2 // AT5G12840.3 // AT1G27360.2 // AT5G12…
GO:0007389	P	pattern specification process	4.3e-10	7.1e-09	// AT1G01040.1 // AT5G53950.1 // AT1G52150.1 // AT2G34710.1 // AT1G52150.3 // AT1G52150.2 // AT5G60690.1 // AT1G02800.1 // AT3G15170.1 // AT2G28350.1 // AT4G30080.1 // AT1G30490.1
GO:0010556	P	regulation of macromolecule biosynthetic process	4.2e-23	7.5e-21	// AT2G26950.1 // AT1G52150.1 // AT1G52150.3 // AT1G52150.2 // AT5G60690.1 // AT5G18560.1 // AT3G11440.1 // AT3G15270.1 // AT5G12840.4 // AT5G58610.1 // AT5G06510.2 // AT5G06510.3 // AT3G05690.1 // AT4G32880.1 // AT1G49475.1 // AT3G60460.1 // AT5G06510.1 // AT1G69170.1 // AT5G50570.1 // AT1G30490.1 // AT5G50570.2 // AT5G12840.3 // AT1G27360.2 // AT5G12840.1 // AT5G37020.1 // AT5G37020.2 // AT2G34…
GO:0005488	F	binding	4.2e-09	1e-07	// AT1G01040.1 // AT1G52150.1 // AT1G52150.3 // AT1G52150.2 // AT5G60690.1 // AT3G15270.1 // AT5G58610.1 // AT5G06510.2 // AT5G06510.3 // AT5G37450.1 // AT3G05690.1 // AT3G07740.3 // AT5G50570.1 // AT5G50570.2 // AT5G37020.1 // AT5G37020.2 // AT4G00850.1 // AT5G15810.1 // AT2G47020.1 // AT2G47020.2 // AT1G30330.2 // AT2G21840.1 // AT5G43270.2 // AT5G43270.3 // AT5G43270.1 // AT1G30330.1 // AT3G61…
GO:0044237	P	cellular metabolic process	4.2e-08	6.1e-07	// AT1G01040.1 // AT1G52150.1 // AT4G31150.2 // AT4G31150.1 // AT1G52150.2 // AT3G62260.2 // AT5G60690.1 // AT3G62260.1 // AT3G15270.1 // AT5G58610.1 // AT5G06510.2 // AT5G06510.3 // AT5G37450.1 // AT3G05690.1 // AT1G17000.1 // AT4G28660.1 // AT5G35630.1 // AT5G50570.1 // AT5G50570.2 // AT5G37020.1 // AT5G37020.2 // AT5G15810.1 // AT2G47020.1 // AT2G47020.2 // AT5G43270.2 // AT5G43270.3 // AT5G43…
GO:0009755	P	hormone-mediated signaling pathway	4.2e-05	0.00036	// AT2G32460.1 // AT3G11440.1 // AT1G56010.2 // AT1G56010.1 // AT1G77850.1 // AT5G06100.3 // AT2G32460.2 // AT2G28350.1 // AT5G06100.2 // AT5G06100.1
GO:0032870	P	cellular response to hormone stimulus	4.2e-05	0.00036	// AT2G32460.1 // AT3G11440.1 // AT1G56010.2 // AT1G56010.1 // AT1G77850.1 // AT5G06100.3 // AT2G32460.2 // AT2G28350.1 // AT5G06100.2 // AT5G06100.1
GO:0006350	P	transcription	3e-22	2.4e-20	// AT2G26950.1 // AT1G52150.1 // AT1G52150.3 // AT1G52150.2 // AT5G60690.1 // AT5G18560.1 // AT3G11440.1 // AT3G15270.1 // AT5G12840.4 // AT5G58610.1 // AT5G06510.2 // AT5G06510.3 // AT3G05690.1 // AT4G32880.1 // AT1G49475.1 // AT3G60460.1 // AT5G06510.1 // AT1G69170.1 // AT5G50570.1 // AT1G30490.1 // AT5G50570.2 // AT5G12840.3 // AT1G27360.2 // AT5G12840.1 // AT5G37020.1 // AT5G37020.2 // AT2G34…
GO:0010154	P	fruit development	3e-06	3.1e-05	// AT5G53950.1 // AT2G41720.1 // AT2G34710.1 // AT2G41720.2 // AT4G32880.1 // AT1G56010.1 // AT1G56010.2 // AT1G30490.1 // AT2G04842.1 // AT3G15170.1 // AT2G28350.1 // AT5G12840.4 // AT5G12840.3 // AT5G12840.2 // AT5G12840.1
GO:0010467	P	gene expression	3.9e-15	1.3e-13	// AT2G26950.1 // AT1G01040.1 // AT1G52150.1 // AT1G52150.3 // AT1G52150.2 // AT5G60690.1 // AT5G18560.1 // AT3G11440.1 // ATCG00880.1 // AT3G15270.1 // AT5G12840.4 // AT5G58610.1 // AT5G06510.2 // AT5G06510.3 // AT3G17185.2 // AT3G05690.1 // AT3G17185.1 // AT4G32880.1 // AT1G49475.1 // AT3G60460.1 // AT5G06510.1 // AT1G69170.1 // AT2G13440.1 // ATCG01260.1 // AT5G50570.1 // AT1G30490.1 // AT5G50…
GO:0009799	P	specification of symmetry	3.8e-10	6.5e-09	// AT1G52150.1 // AT2G34710.1 // AT1G52150.3 // AT1G52150.2 // AT5G60690.1 // AT1G30490.1
GO:0005667	C	transcription factor complex	3.8e-10	1.6e-08	// AT3G05690.1 // AT5G12840.2 // AT3G20910.1 // AT5G12840.1 // AT5G12840.4 // AT5G12840.3 // AT5G06510.1 // AT5G06510.2 // AT5G06510.3
GO:0010476	P	gibberellin mediated signaling pathway	3.8e-07	4.8e-06	// AT3G11440.1 // AT2G32460.1 // AT2G32460.2 // AT5G06100.3 // AT5G06100.2 // AT5G06100.1
GO:0009740	P	gibberellic acid mediated signaling pathway	3.8e-07	4.8e-06	// AT3G11440.1 // AT2G32460.1 // AT2G32460.2 // AT5G06100.3 // AT5G06100.2 // AT5G06100.1
GO:0009733	P	response to auxin stimulus	3.8e-06	3.8e-05	// AT1G30330.1 // AT5G37020.1 // AT5G37020.2 // AT1G30330.2 // AT4G32880.1 // AT1G56010.1 // AT1G56010.2 // AT1G77850.1 // AT1G54990.1 // AT2G47750.1 // AT2G28350.1 // AT4G30080.1
GO:0008152	P	metabolic process	3.7e-06	3.8e-05	// AT1G01040.1 // AT1G52150.1 // AT4G31150.2 // AT4G31150.1 // AT1G52150.2 // AT3G62260.2 // AT5G60690.1 // AT3G62260.1 // AT3G15270.1 // AT5G58610.1 // AT5G06510.2 // AT5G06510.3 // AT5G37450.1 // AT3G05690.1 // AT4G33620.1 // AT1G17000.1 // AT4G28660.1 // AT5G35630.1 // AT5G50570.1 // AT5G50570.2 // AT1G68560.1 // AT5G37020.1 // AT5G37020.2 // AT5G15810.1 // AT2G47020.1 // AT2G47020.2 // AT5G43…
GO:0009738	P	abscisic acid mediated signaling pathway	3.7e-05	0.00032	// AT5G06100.3 // AT2G32460.1 // AT2G32460.2 // AT2G28350.1 // AT5G06100.2 // AT5G06100.1
GO:0000003	P	reproduction	3.6e-14	1.1e-12	// AT1G01040.1 // AT1G52150.1 // AT2G02850.1 // AT1G52150.3 // AT1G52150.2 // AT5G18560.1 // AT3G11440.1 // AT2G41720.1 // AT3G05690.1 // AT2G41720.2 // AT4G32880.1 // AT3G60460.1 // AT1G56010.1 // AT1G56010.2 // AT5G12840.4 // AT5G12840.3 // AT5G12840.2 // AT5G12840.1 // AT5G37020.1 // AT5G37020.2 // AT5G53950.1 // AT2G34710.1 // AT2G28350.1 // AT2G33810.1 // AT2G04842.1 // AT2G42200.1 // AT3G03…
GO:0006807	P	nitrogen compound metabolic process	3.4e-18	1.6e-16	// AT2G26950.1 // AT1G01040.1 // AT3G23890.1 // AT1G52150.1 // AT4G31150.2 // AT4G31150.1 // AT1G52150.2 // AT1G52500.2 // AT5G60690.1 // AT1G52500.1 // AT3G11440.1 // AT3G15270.1 // AT5G12840.4 // AT5G58610.1 // AT5G06510.2 // AT5G06510.3 // AT3G05690.1 // AT4G37770.1 // AT4G32880.1 // AT1G52150.3 // AT4G30440.1 // AT5G06510.1 // AT1G69170.1 // AT2G13440.1 // AT5G64630.1 // AT5G35630.1 // AT5G50…
GO:0008283	P	cell proliferation	3.4e-07	4.5e-06	// AT5G64630.1 // AT5G64630.3 // AT5G64630.2 // AT4G00850.1 // AT4G32880.1 // AT3G57920.1 // AT1G01160.1
GO:0003006	P	reproductive developmental process	3.2e-11	6.1e-10	// AT1G01040.1 // AT1G52150.1 // AT2G02850.1 // AT1G52150.3 // AT1G52150.2 // AT5G18560.1 // AT2G41720.1 // AT2G41720.2 // AT4G32880.1 // AT1G56010.1 // AT1G56010.2 // AT5G12840.4 // AT5G12840.3 // AT5G12840.2 // AT5G12840.1 // AT5G37020.1 // AT5G37020.2 // AT5G53950.1 // AT2G34710.1 // AT2G33810.1 // AT2G04842.1 // AT2G42200.1 // AT1G30490.1 // AT1G30330.1 // AT1G30330.2 // AT3G57920.1 // AT3G15…
GO:0048608	P	reproductive structure development	3.2e-11	6.1e-10	// AT1G01040.1 // AT1G52150.1 // AT2G02850.1 // AT1G52150.3 // AT1G52150.2 // AT5G18560.1 // AT2G41720.1 // AT2G41720.2 // AT4G32880.1 // AT1G56010.1 // AT1G56010.2 // AT5G12840.4 // AT5G12840.3 // AT5G12840.2 // AT5G12840.1 // AT5G37020.1 // AT5G37020.2 // AT5G53950.1 // AT2G34710.1 // AT2G33810.1 // AT2G04842.1 // AT2G42200.1 // AT1G30490.1 // AT1G30330.1 // AT1G30330.2 // AT3G57920.1 // AT3G15…
GO:0032501	P	multicellular organismal process	2e-18	1.1e-16	// AT1G01040.1 // AT5G64630.2 // AT1G52150.1 // AT2G02850.1 // AT1G52150.3 // AT1G52150.2 // AT5G60690.1 // AT5G18560.1 // AT3G11440.1 // AT5G07680.1 // AT1G02800.1 // AT3G15270.1 // AT5G12840.4 // AT3G17185.2 // AT2G41720.1 // AT3G17185.1 // AT5G61430.1 // AT3G60460.1 // AT5G62500.1 // AT1G56010.1 // AT1G56010.2 // AT1G30490.1 // AT5G64630.1 // AT3G57920.1 // AT4G30080.1 // AT5G12840.3 // AT5G12…
GO:0022414	P	reproductive process	2e-14	6e-13	// AT1G01040.1 // AT1G52150.1 // AT2G02850.1 // AT1G52150.3 // AT1G52150.2 // AT5G18560.1 // AT3G11440.1 // AT2G41720.1 // AT3G05690.1 // AT2G41720.2 // AT4G32880.1 // AT3G60460.1 // AT1G56010.1 // AT1G56010.2 // AT5G12840.4 // AT5G12840.3 // AT5G12840.2 // AT5G12840.1 // AT5G37020.1 // AT5G37020.2 // AT5G53950.1 // AT2G34710.1 // AT2G28350.1 // AT2G33810.1 // AT2G04842.1 // AT2G42200.1 // AT3G03…
GO:0048856	P	anatomical structure development	2e-13	4.7e-12	// AT1G01040.1 // AT1G52150.1 // AT2G02850.1 // AT1G52150.3 // AT1G52150.2 // AT5G60690.1 // AT5G18560.1 // AT5G64630.2 // AT5G12840.4 // AT3G17185.2 // AT2G41720.1 // AT3G17185.1 // AT4G32880.1 // AT1G56010.1 // AT1G56010.2 // AT1G30490.1 // AT5G64630.1 // AT3G57920.1 // AT4G30080.1 // AT5G12840.3 // AT5G12840.2 // AT5G12840.1 // AT5G37020.1 // AT5G37020.2 // AT5G53950.1 // AT2G34710.1 // AT4G00…
GO:0016070	P	RNA metabolic process	2e-11	4.3e-10	// AT1G01040.1 // AT1G52150.1 // AT1G52150.3 // AT1G52150.2 // AT5G60690.1 // AT5G18560.1 // AT5G58610.1 // AT5G06510.2 // AT5G06510.3 // AT3G05690.1 // AT4G32880.1 // AT1G49475.1 // AT3G60460.1 // AT5G06510.1 // AT2G13440.1 // AT5G12840.4 // AT5G12840.3 // AT5G12840.2 // AT5G12840.1 // AT5G37020.1 // AT5G37020.2 // AT2G34710.1 // AT5G15810.1 // AT2G28350.1 // AT2G32460.2 // AT2G04842.1 // AT1G30…
GO:0048438	P	floral whorl development	2.8e-06	3e-05	// AT1G52150.1 // AT2G34710.1 // AT1G52150.3 // AT1G52150.2 // AT3G15170.1 // AT2G28350.1 // AT2G02850.1 // AT1G30490.1
GO:0009888	P	tissue development	2.7e-11	5.4e-10	// AT5G64630.1 // AT5G64630.3 // AT5G53950.1 // AT1G52150.1 // AT2G34710.1 // AT1G52150.3 // AT1G52150.2 // AT4G32880.1 // AT5G60690.1 // AT1G56010.1 // AT1G56010.2 // AT1G30490.1 // AT5G64630.2 // AT3G15170.1 // AT5G12840.4 // AT5G12840.3 // AT5G12840.2 // AT5G12840.1
GO:0005654	C	nucleoplasm	2.7e-07	3.9e-06	// AT1G01040.1 // AT3G05690.1 // AT5G12840.2 // AT3G20910.1 // AT5G12840.1 // AT5G12840.4 // AT5G12840.3 // AT5G06510.1 // AT5G06510.2 // AT5G06510.3
GO:0048481	P	ovule development	2.7e-05	0.00024	// AT1G30490.1 // AT1G52150.1 // AT2G34710.1 // AT1G52150.3 // AT1G52150.2
GO:0022621	P	shoot system development	2.6e-11	5.3e-10	// AT5G64630.1 // AT5G64630.3 // AT5G53950.1 // AT1G52150.1 // AT2G34710.1 // AT1G52150.3 // AT4G00850.1 // AT4G32880.1 // AT1G52150.2 // AT1G56010.1 // AT1G56010.2 // AT5G64630.2 // AT3G17185.1 // AT3G15170.1 // AT2G28350.1 // AT3G17185.2 // AT1G30490.1 // AT1G01160.1
GO:0043170	P	macromolecule metabolic process	2.6e-10	4.5e-09	// AT2G26950.1 // AT1G01040.1 // AT3G23890.1 // AT1G52150.1 // AT4G31150.2 // AT4G31150.1 // AT1G52150.2 // AT3G62260.2 // AT5G60690.1 // AT3G62260.1 // AT3G11440.1 // ATCG00880.1 // AT3G15270.1 // AT5G12840.4 // AT5G58610.1 // AT5G06510.2 // AT5G06510.3 // AT5G37450.1 // AT3G05690.1 // AT3G17185.1 // AT4G32880.1 // AT1G52150.3 // AT3G60460.1 // AT4G33620.1 // AT5G06510.1 // AT1G52500.2 // AT2G13…
GO:0009908	P	flower development	2.5e-08	3.7e-07	// AT1G30330.1 // AT5G37020.1 // AT1G01040.1 // AT1G30330.2 // AT1G52150.1 // AT2G34710.1 // AT1G52150.3 // AT1G52150.2 // AT5G18560.1 // AT5G37020.2 // AT2G33810.1 // AT3G15170.1 // AT2G28350.1 // AT2G02850.1 // AT1G30490.1
GO:0010014	P	meristem initiation	2.4e-19	1.4e-17	// AT5G53950.1 // AT1G52150.1 // AT2G34710.1 // AT1G52150.3 // AT1G52150.2 // AT4G32880.1 // AT5G60690.1 // AT1G56010.1 // AT1G56010.2 // AT3G15170.1 // AT1G30490.1
GO:0048367	P	shoot development	2.3e-11	4.8e-10	// AT5G64630.1 // AT5G64630.3 // AT5G53950.1 // AT1G52150.1 // AT2G34710.1 // AT1G52150.3 // AT4G00850.1 // AT4G32880.1 // AT1G52150.2 // AT1G56010.1 // AT1G56010.2 // AT5G64630.2 // AT3G17185.1 // AT3G15170.1 // AT2G28350.1 // AT3G17185.2 // AT1G30490.1 // AT1G01160.1
GO:0007275	P	multicellular organismal development	2.2e-18	1.1e-16	// AT1G01040.1 // AT5G64630.2 // AT1G52150.1 // AT2G02850.1 // AT1G52150.3 // AT1G52150.2 // AT5G60690.1 // AT5G18560.1 // AT3G11440.1 // AT5G07680.1 // AT1G02800.1 // AT3G15270.1 // AT5G12840.4 // AT3G17185.2 // AT2G41720.1 // AT3G17185.1 // AT5G61430.1 // AT3G60460.1 // AT1G56010.1 // AT1G56010.2 // AT1G30490.1 // AT5G64630.1 // AT3G57920.1 // AT4G30080.1 // AT5G12840.3 // AT5G12840.2 // AT5G12…
GO:0044428	C	nuclear part	2.2e-06	2.6e-05	// AT5G64630.1 // AT1G01040.1 // AT5G64630.2 // AT3G05690.1 // AT2G28510.1 // AT3G20910.1 // AT5G64630.3 // AT5G12840.2 // AT4G12080.1 // AT5G12840.1 // AT5G12840.4 // AT5G12840.3 // AT5G06510.1 // AT5G06510.2 // AT5G06510.3
GO:0019222	P	regulation of metabolic process	2.1e-22	1.9e-20	// AT2G26950.1 // AT1G01040.1 // AT1G52150.1 // AT1G52150.3 // AT1G52150.2 // AT5G60690.1 // AT5G18560.1 // AT3G11440.1 // AT3G15270.1 // AT5G12840.4 // AT5G58610.1 // AT5G06510.2 // AT5G06510.3 // AT3G17185.2 // AT3G05690.1 // AT3G17185.1 // AT4G32880.1 // AT1G49475.1 // AT3G60460.1 // AT5G06510.1 // AT1G69170.1 // AT5G50570.1 // AT1G30490.1 // AT5G50570.2 // AT5G12840.3 // AT1G27360.2 // AT5G12…
GO:0048229	P	gametophyte development	2.1e-05	0.00018	// AT5G64630.1 // AT5G64630.3 // AT5G64630.2 // AT3G60460.1 // AT3G11440.1 // AT5G06100.2 // AT5G06100.3 // AT3G03810.1 // AT5G06100.1
GO:0032502	P	developmental process	1e-16	3.9e-15	// AT1G01040.1 // AT5G64630.2 // AT1G52150.1 // AT2G02850.1 // AT1G52150.3 // AT1G52150.2 // AT5G60690.1 // AT5G18560.1 // AT3G11440.1 // AT5G07680.1 // AT1G02800.1 // AT3G15270.1 // AT5G12840.4 // AT3G17185.2 // AT2G41720.1 // AT3G17185.1 // AT5G61430.1 // AT3G60460.1 // AT1G56010.1 // AT1G56010.2 // AT1G30490.1 // AT5G64630.1 // AT5G35630.1 // AT3G57920.1 // AT4G30080.1 // AT5G12840.3 // AT5G12…
GO:0009787	P	regulation of abscisic acid mediated signaling pathway	1e-05	9.6e-05	// AT5G06100.3 // AT5G06100.2 // AT5G06100.1 // AT2G32460.2 // AT2G32460.1
GO:0009058	P	biosynthetic process	1.9e-08	2.9e-07	// AT2G26950.1 // AT1G52150.1 // AT1G52150.3 // AT1G52150.2 // AT1G79750.1 // AT5G60690.1 // AT5G18560.1 // AT3G11440.1 // ATCG00880.1 // AT3G15270.1 // AT5G12840.4 // AT5G58610.1 // AT5G06510.2 // AT5G06510.3 // AT3G05690.1 // AT4G32880.1 // AT1G49475.1 // AT3G60460.1 // AT5G06510.1 // AT1G17000.1 // ATCG01260.1 // AT5G50570.1 // AT1G69170.1 // AT5G50570.2 // AT5G12840.3 // AT1G27360.2 // AT5G12…
GO:0051239	P	regulation of multicellular organismal process	1.9e-06	2.1e-05	// AT2G33810.1 // AT1G52150.1 // AT1G52150.3 // AT1G52150.2 // AT1G53160.1 // AT5G53950.1 // AT3G15270.1 // AT5G12840.4 // AT5G12840.3 // AT5G12840.2 // AT5G12840.1
GO:0044260	P	cellular macromolecule metabolic process	1.8e-10	3.2e-09	// AT2G26950.1 // AT1G01040.1 // AT3G23890.1 // AT1G52150.1 // AT4G31150.2 // AT4G31150.1 // AT1G52150.2 // AT3G62260.2 // AT5G60690.1 // AT3G62260.1 // AT3G11440.1 // ATCG00880.1 // AT3G15270.1 // AT5G12840.4 // AT5G58610.1 // AT5G06510.2 // AT5G06510.3 // AT5G37450.1 // AT3G05690.1 // AT4G32880.1 // AT1G52150.3 // AT3G60460.1 // AT5G06510.1 // AT1G52500.2 // AT2G13440.1 // AT5G64630.1 // ATCG01…
GO:0010072	P	primary shoot apical meristem specification	1.8e-10	3.2e-09	// AT5G53950.1 // AT2G34710.1 // AT4G32880.1 // AT1G56010.1 // AT1G56010.2 // AT3G15170.1 // AT1G30490.1
GO:0009790	P	embryonic development	1.8e-06	2e-05	// AT1G01040.1 // AT5G53950.1 // AT2G41720.1 // AT2G34710.1 // AT2G41720.2 // AT4G32880.1 // AT1G56010.1 // AT1G56010.2 // AT1G30490.1 // AT2G04842.1 // AT3G15170.1 // AT5G12840.4 // AT5G12840.3 // AT5G12840.2 // AT5G12840.1
GO:0009793	P	embryonic development ending in seed dormancy	1.8e-06	2e-05	// AT5G53950.1 // AT2G41720.1 // AT2G34710.1 // AT2G41720.2 // AT4G32880.1 // AT1G56010.1 // AT1G56010.2 // AT1G30490.1 // AT2G04842.1 // AT3G15170.1 // AT5G12840.4 // AT5G12840.3 // AT5G12840.2 // AT5G12840.1
GO:0030154	P	cell differentiation	1.8e-05	0.00017	// AT5G64630.1 // AT5G64630.3 // AT5G64630.2 // AT3G60460.1 // AT4G32880.1 // AT5G60690.1 // AT3G11440.1 // AT5G06100.2 // AT5G06100.3 // AT3G03810.1 // AT5G06100.1
GO:0065007	P	biological regulation	1.7e-14	5.3e-13	// AT2G26950.1 // AT1G01040.1 // AT1G52150.1 // AT1G52150.3 // AT1G52150.2 // AT5G60690.1 // AT2G21840.1 // AT3G11440.1 // AT3G15270.1 // AT5G12840.4 // AT5G58610.1 // AT5G06510.2 // AT5G06510.3 // AT3G17185.2 // AT3G05690.1 // AT3G17185.1 // AT4G32880.1 // AT1G49475.1 // AT3G60460.1 // AT1G56010.1 // AT1G56010.2 // AT5G06510.1 // AT1G69170.1 // AT1G54990.1 // AT5G50570.1 // AT3G43740.1 // AT1G30…
GO:0032774	P	RNA biosynthetic process	1.7e-13	4.1e-12	// AT1G52150.1 // AT1G52150.3 // AT1G52150.2 // AT5G60690.1 // AT5G18560.1 // AT5G06510.1 // AT5G06510.2 // AT5G06510.3 // AT3G05690.1 // AT4G32880.1 // AT1G49475.1 // AT3G60460.1 // AT5G58610.1 // AT5G12840.4 // AT5G12840.3 // AT5G12840.2 // AT5G12840.1 // AT5G37020.1 // AT5G37020.2 // AT2G34710.1 // AT2G28350.1 // AT2G32460.2 // AT1G30490.1 // AT1G30330.1 // AT3G61740.1 // AT3G61740.2 // AT1G30…
GO:0043226	C	organelle	1.7e-07	2.7e-06	// AT1G01040.1 // AT3G23890.1 // AT1G52150.1 // AT1G52150.3 // AT1G52150.2 // AT1G79750.1 // AT5G60690.1 // AT5G19950.3 // AT3G11440.1 // AT3G06483.1 // AT2G45990.1 // AT4G15530.2 // AT5G50670.1 // ATCG00880.1 // AT3G15270.1 // AT1G52590.1 // AT5G48600.1 // AT5G58610.1 // AT5G06510.2 // AT5G06510.3 // AT5G24810.1 // AT4G15530.5 // AT4G15530.4 // AT4G15530.3 // AT3G05690.1 // AT4G15530.1 // AT4G32…
GO:0010468	P	regulation of gene expression	1.6e-24	1.3e-21	// AT2G26950.1 // AT1G01040.1 // AT1G52150.1 // AT1G52150.3 // AT1G52150.2 // AT5G60690.1 // AT5G18560.1 // AT3G11440.1 // AT3G15270.1 // AT5G12840.4 // AT5G58610.1 // AT5G06510.2 // AT5G06510.3 // AT3G17185.2 // AT3G05690.1 // AT3G17185.1 // AT4G32880.1 // AT1G49475.1 // AT3G60460.1 // AT5G06510.1 // AT1G69170.1 // AT5G50570.1 // AT1G30490.1 // AT5G50570.2 // AT5G12840.3 // AT1G27360.2 // AT5G12…
GO:0048513	P	organ development	1.6e-13	4.1e-12	// AT1G52150.1 // AT2G02850.1 // AT1G52150.3 // AT1G52150.2 // AT5G60690.1 // AT5G18560.1 // AT3G17185.2 // AT3G17185.1 // AT4G32880.1 // AT1G56010.1 // AT1G56010.2 // AT1G30490.1 // AT4G30080.1 // AT5G12840.3 // AT5G12840.2 // AT5G12840.1 // AT5G53950.1 // AT2G34710.1 // AT4G00850.1 // AT5G64630.2 // AT1G01160.1 // AT2G42430.1 // AT5G64630.1 // AT5G64630.3 // AT5G12840.4 // AT1G77850.1 // AT5G39…
GO:0048731	P	system development	1.6e-13	4.1e-12	// AT1G52150.1 // AT2G02850.1 // AT1G52150.3 // AT1G52150.2 // AT5G60690.1 // AT5G18560.1 // AT3G17185.2 // AT3G17185.1 // AT4G32880.1 // AT1G56010.1 // AT1G56010.2 // AT1G30490.1 // AT4G30080.1 // AT5G12840.3 // AT5G12840.2 // AT5G12840.1 // AT5G53950.1 // AT2G34710.1 // AT4G00850.1 // AT5G64630.2 // AT1G01160.1 // AT2G42430.1 // AT5G64630.1 // AT5G64630.3 // AT5G12840.4 // AT1G77850.1 // AT5G39…
GO:0043229	C	intracellular organelle	1.6e-07	2.7e-06	// AT1G01040.1 // AT3G23890.1 // AT1G52150.1 // AT1G52150.3 // AT1G52150.2 // AT1G79750.1 // AT5G60690.1 // AT5G19950.3 // AT3G11440.1 // AT3G06483.1 // AT2G45990.1 // AT4G15530.2 // AT5G50670.1 // ATCG00880.1 // AT3G15270.1 // AT1G52590.1 // AT5G48600.1 // AT5G58610.1 // AT5G06510.2 // AT5G06510.3 // AT5G24810.1 // AT4G15530.5 // AT4G15530.4 // AT4G15530.3 // AT3G05690.1 // AT4G15530.1 // AT4G32…
GO:0019953	P	sexual reproduction	1.6e-05	0.00014	// AT3G05690.1 // AT3G60460.1 // AT3G11440.1 // AT5G06100.3 // AT5G06100.2 // AT5G06100.1
GO:0045449	P	regulation of transcription	1.5e-23	4e-21	// AT2G26950.1 // AT1G52150.1 // AT1G52150.3 // AT1G52150.2 // AT5G60690.1 // AT5G18560.1 // AT3G11440.1 // AT3G15270.1 // AT5G12840.4 // AT5G58610.1 // AT5G06510.2 // AT5G06510.3 // AT3G05690.1 // AT4G32880.1 // AT1G49475.1 // AT3G60460.1 // AT5G06510.1 // AT1G69170.1 // AT5G50570.1 // AT1G30490.1 // AT5G50570.2 // AT5G12840.3 // AT1G27360.2 // AT5G12840.1 // AT5G37020.1 // AT5G37020.2 // AT2G34…
GO:0016602	C	CCAAT-binding factor complex	1.5e-12	9.5e-11	// AT3G05690.1 // AT5G12840.2 // AT3G20910.1 // AT5G12840.1 // AT5G12840.4 // AT5G12840.3 // AT5G06510.1 // AT5G06510.2 // AT5G06510.3
GO:0044238	P	primary metabolic process	1.5e-06	1.7e-05	// AT1G01040.1 // AT1G52150.1 // AT4G31150.2 // AT4G31150.1 // AT1G52150.2 // AT3G62260.2 // AT5G60690.1 // AT3G62260.1 // AT3G15270.1 // AT5G58610.1 // AT5G06510.2 // AT5G06510.3 // AT5G37450.1 // AT3G05690.1 // AT2G13440.1 // AT1G17000.1 // AT5G35630.1 // AT5G50570.1 // AT5G50570.2 // AT1G68560.1 // AT5G37020.1 // AT5G37020.2 // AT5G15810.1 // AT2G47020.1 // AT2G47020.2 // AT5G43270.2 // AT5G43…
GO:0044451	C	nucleoplasm part	1.4e-07	2.7e-06	// AT1G01040.1 // AT3G05690.1 // AT5G12840.2 // AT3G20910.1 // AT5G12840.1 // AT5G12840.4 // AT5G12840.3 // AT5G06510.1 // AT5G06510.2 // AT5G06510.3
GO:0048467	P	gynoecium development	1.4e-05	0.00013	// AT1G52150.1 // AT2G34710.1 // AT1G52150.3 // AT1G52150.2 // AT3G15170.1 // AT1G30490.1
GO:0051171	P	regulation of nitrogen compound metabolic process	1.3e-22	1.3e-20	// AT2G26950.1 // AT1G52150.1 // AT1G52150.3 // AT1G52150.2 // AT5G60690.1 // AT5G18560.1 // AT3G11440.1 // AT3G15270.1 // AT5G12840.4 // AT5G58610.1 // AT5G06510.2 // AT5G06510.3 // AT3G05690.1 // AT4G32880.1 // AT1G49475.1 // AT3G60460.1 // AT5G06510.1 // AT1G69170.1 // AT5G50570.1 // AT1G30490.1 // AT5G50570.2 // AT5G12840.3 // AT1G27360.2 // AT5G12840.1 // AT5G37020.1 // AT5G37020.2 // AT2G34…
GO:0005634	C	nucleus	1.3e-21	1.7e-19	// AT1G01040.1 // AT3G23890.1 // AT1G52150.1 // AT1G52150.3 // AT1G52150.2 // AT5G60690.1 // AT5G18560.1 // AT3G11440.1 // AT5G64630.2 // AT4G15530.2 // AT5G50670.1 // AT3G15270.1 // AT5G12840.4 // AT5G48600.1 // AT5G58610.1 // AT5G06510.2 // AT5G06510.3 // AT4G15530.5 // AT4G15530.4 // AT4G15530.3 // AT3G05690.1 // AT4G15530.1 // AT4G32880.1 // AT3G60460.1 // AT5G62500.1 // AT5G06510.1 // AT1G67…
GO:0048532	P	anatomical structure arrangement	1.3e-17	5.5e-16	// AT5G64630.1 // AT5G64630.3 // AT5G53950.1 // AT1G52150.1 // AT2G34710.1 // AT1G52150.3 // AT1G52150.2 // AT4G32880.1 // AT5G60690.1 // AT1G56010.1 // AT1G56010.2 // AT5G64630.2 // AT3G15170.1 // AT1G30490.1
GO:0050789	P	regulation of biological process	1.3e-16	4.6e-15	// AT2G26950.1 // AT1G01040.1 // AT1G52150.1 // AT1G52150.3 // AT1G52150.2 // AT5G60690.1 // AT2G21840.1 // AT3G11440.1 // AT3G15270.1 // AT5G12840.4 // AT5G58610.1 // AT5G06510.2 // AT5G06510.3 // AT3G17185.2 // AT3G05690.1 // AT3G17185.1 // AT4G32880.1 // AT1G49475.1 // AT3G60460.1 // AT1G56010.1 // AT1G56010.2 // AT5G06510.1 // AT1G69170.1 // AT5G18560.1 // AT5G50570.1 // AT3G43740.1 // AT1G30…
GO:0048827	P	phyllome development	1.3e-07	1.7e-06	// AT5G64630.1 // AT5G64630.3 // AT5G53950.1 // AT1G52150.1 // AT1G52150.3 // AT4G00850.1 // AT1G52150.2 // AT3G17185.1 // AT5G64630.2 // AT1G01160.1 // AT2G28350.1 // AT3G17185.2
GO:0009789	P	positive regulation of abscisic acid mediated signaling pathway	1.2e-07	1.6e-06	// AT5G06100.3 // AT5G06100.2 // AT5G06100.1 // AT2G32460.2 // AT2G32460.1
GO:0048232	P	male gamete generation	1.2e-07	1.6e-06	// AT5G06100.3 // AT5G06100.2 // AT5G06100.1 // AT3G11440.1 // AT3G60460.1
GO:0009987	P	cellular process	1.2e-06	1.4e-05	// AT1G01040.1 // AT1G52150.1 // AT4G31150.2 // AT4G31150.1 // AT1G52150.2 // AT3G62260.2 // AT5G60690.1 // AT3G62260.1 // AT3G15270.1 // AT5G58610.1 // AT5G06510.2 // AT5G06510.3 // AT5G37450.1 // AT3G05690.1 // AT1G17000.1 // AT4G28660.1 // AT5G35630.1 // AT5G50570.1 // AT5G50570.2 // AT5G37020.1 // AT5G37020.2 // AT4G00850.1 // AT5G15810.1 // AT2G47020.1 // AT2G47020.2 // AT2G21840.1 // AT5G43…
GO:0009889	P	regulation of biosynthetic process	1.1e-22	1.3e-20	// AT2G26950.1 // AT1G52150.1 // AT1G52150.3 // AT1G52150.2 // AT5G60690.1 // AT5G18560.1 // AT3G11440.1 // AT3G15270.1 // AT5G12840.4 // AT5G58610.1 // AT5G06510.2 // AT5G06510.3 // AT3G05690.1 // AT4G32880.1 // AT1G49475.1 // AT3G60460.1 // AT5G06510.1 // AT1G69170.1 // AT5G50570.1 // AT1G30490.1 // AT5G50570.2 // AT5G12840.3 // AT1G27360.2 // AT5G12840.1 // AT5G37020.1 // AT5G37020.2 // AT2G34…
GO:0031326	P	regulation of cellular biosynthetic process	1.1e-22	1.3e-20	// AT2G26950.1 // AT1G52150.1 // AT1G52150.3 // AT1G52150.2 // AT5G60690.1 // AT5G18560.1 // AT3G11440.1 // AT3G15270.1 // AT5G12840.4 // AT5G58610.1 // AT5G06510.2 // AT5G06510.3 // AT3G05690.1 // AT4G32880.1 // AT1G49475.1 // AT3G60460.1 // AT5G06510.1 // AT1G69170.1 // AT5G50570.1 // AT1G30490.1 // AT5G50570.2 // AT5G12840.3 // AT1G27360.2 // AT5G12840.1 // AT5G37020.1 // AT5G37020.2 // AT2G34…
GO:0006355	P	regulation of transcription	4.3e-14	1.2e-12	// AT1G52150.1 // AT1G52150.3 // AT1G52150.2 // AT5G60690.1 // AT5G18560.1 // AT5G06510.1 // AT5G06510.2 // AT5G06510.3 // AT3G05690.1 // AT4G32880.1 // AT1G49475.1 // AT3G60460.1 // AT5G58610.1 // AT5G12840.4 // AT5G12840.3 // AT5G12840.2 // AT5G12840.1 // AT5G37020.1 // AT5G37020.2 // AT2G34710.1 // AT2G28350.1 // AT2G32460.2 // AT1G30490.1 // AT1G30330.1 // AT3G61740.1 // AT3G61740.2 // AT1G30…
GO:0006351	P	transcription	1.7e-13	4.1e-12	// AT1G52150.1 // AT1G52150.3 // AT1G52150.2 // AT5G60690.1 // AT5G18560.1 // AT5G06510.1 // AT5G06510.2 // AT5G06510.3 // AT3G05690.1 // AT4G32880.1 // AT1G49475.1 // AT3G60460.1 // AT5G58610.1 // AT5G12840.4 // AT5G12840.3 // AT5G12840.2 // AT5G12840.1 // AT5G37020.1 // AT5G37020.2 // AT2G34710.1 // AT2G28350.1 // AT2G32460.2 // AT1G30490.1 // AT1G30330.1 // AT3G61740.1 // AT3G61740.2 // AT1G30…
GO:0040034	P	regulation of development	6.6e-06	6.4e-05	// AT5G53950.1 // AT5G12840.4 // AT5G12840.3 // AT5G12840.2 // AT5G12840.1
GO:0050242	F	pyruvate	3.7e-09	1e-07	// AT4G15530.5 // AT4G15530.4 // AT4G15530.3 // AT4G15530.2 // AT4G15530.1
GO:0016781	F	phosphotransferase activity	1.6e-08	3.4e-07	// AT4G15530.5 // AT4G15530.4 // AT4G15530.3 // AT4G15530.2 // AT4G15530.1
GO:0016741	F	transferase activity	7.1e-05	0.0011	// AT5G15810.1 // AT3G44870.1 // AT1G15125.1 // AT1G66700.3 // AT1G66700.1 // AT1G66720.1 // AT1G66690.1 // AT3G02320.1 // AT3G15530.2
GO:0016817	F	hydrolase activity	0.59	1	// AT1G01040.1 // AT3G23890.1 // AT1G12430.1 // AT5G08620.1 // AT4G28710.1
GO:0016788	F	hydrolase activity	0.46	1	// AT1G01040.1 // AT4G31150.2 // AT4G31150.1 // AT5G38610.1 // AT3G62260.2 // AT3G62260.1 // AT2G35320.1 // AT3G60730.1
GO:0016772	F	transferase activity	0.73	1	// AT4G15530.5 // AT4G15530.4 // AT5G37450.1 // AT4G15530.2 // AT4G15530.1 // AT1G50990.1 // AT3G06483.1 // AT3G28690.1 // AT4G15530.3 // AT5G03640.1
GO:0006139	P	nucleobase	3.8e-21	2.5e-19	// AT2G26950.1 // AT1G01040.1 // AT3G23890.1 // AT1G52150.1 // AT4G31150.2 // AT4G31150.1 // AT1G52150.2 // AT1G52500.2 // AT5G60690.1 // AT1G52500.1 // AT3G11440.1 // AT3G15270.1 // AT5G12840.4 // AT5G58610.1 // AT5G06510.2 // AT5G06510.3 // AT3G05690.1 // AT4G32880.1 // AT1G52150.3 // AT4G30440.1 // AT5G06510.1 // AT1G69170.1 // AT2G13440.1 // AT5G64630.1 // AT5G50570.1 // AT1G30490.1 // AT5G50…
GO:0019219	P	regulation of nucleobase	4.6e-23	7.5e-21	// AT2G26950.1 // AT1G52150.1 // AT1G52150.3 // AT1G52150.2 // AT5G60690.1 // AT5G18560.1 // AT3G11440.1 // AT3G15270.1 // AT5G12840.4 // AT5G58610.1 // AT5G06510.2 // AT5G06510.3 // AT3G05690.1 // AT4G32880.1 // AT1G49475.1 // AT3G60460.1 // AT5G06510.1 // AT1G69170.1 // AT5G50570.1 // AT1G30490.1 // AT5G50570.2 // AT5G12840.3 // AT1G27360.2 // AT5G12840.1 // AT5G37020.1 // AT5G37020.2 // AT2G34…
GO:0016818	F	hydrolase activity	0.59	1	// AT1G01040.1 // AT3G23890.1 // AT1G12430.1 // AT5G08620.1 // AT4G28710.1
GO:0019538	P	protein metabolic process	1	1	// AT5G37450.1 // AT3G62260.2 // AT1G50990.1 // AT3G62260.1 // AT2G47020.1 // AT2G47020.2 // AT4G33620.1 // ATCG00880.1 // AT2G04842.1 // AT2G35320.1 // AT3G28690.1 // ATCG01260.1 // AT5G03640.1
GO:0016020	C	membrane	1	1	// AT5G24810.1 // AT3G13910.1 // AT1G61560.1 // AT1G01590.1 // AT2G46890.1 // AT4G35080.1 // AT5G41300.1 // AT4G28660.1 // AT4G35080.2 // AT4G10840.1 // AT1G23020.1 // AT4G36860.1 // AT3G28690.1
GO:0044267	P	cellular protein metabolic process	0.99	1	// AT5G37450.1 // AT3G62260.2 // AT1G50990.1 // AT3G62260.1 // AT2G47020.1 // AT2G47020.2 // ATCG00880.1 // AT2G04842.1 // AT2G35320.1 // AT3G28690.1 // ATCG01260.1 // AT5G03640.1
GO:0006412	P	translation	0.95	1	// ATCG01260.1 // ATCG00880.1 // AT2G04842.1 // AT2G47020.1 // AT2G47020.2
GO:0032555	F	purine ribonucleotide binding	0.94	1	// AT3G23890.1 // AT5G37450.1 // AT1G50990.1 // AT3G06483.1 // AT5G48600.1 // AT3G28690.1
GO:0032553	F	ribonucleotide binding	0.94	1	// AT3G23890.1 // AT5G37450.1 // AT1G50990.1 // AT3G06483.1 // AT5G48600.1 // AT3G28690.1
GO:0007154	P	cell communication	0.93	1	// AT5G06100.3 // AT5G06100.2 // AT5G06100.1 // AT2G32460.2 // AT2G32460.1
GO:0003824	F	catalytic activity	0.93	1	// AT1G01040.1 // AT3G23890.1 // AT4G31150.2 // AT4G31150.1 // AT3G62260.2 // AT1G79750.1 // AT1G52500.2 // AT3G62260.1 // AT3G06483.1 // AT1G02800.1 // AT1G01590.1 // AT2G35320.1 // AT1G66700.3 // AT4G28710.1 // AT1G66700.1 // AT1G15125.1 // AT5G58610.1 // AT4G15530.5 // AT4G15530.4 // AT5G37450.1 // AT4G15530.2 // AT4G15530.1 // AT5G38610.1 // AT4G30440.1 // AT3G44870.1 // AT1G17000.1 // AT4G33…
GO:0044444	C	cytoplasmic part	0.93	1	// AT1G52590.1 // AT1G79750.1 // AT5G19950.2 // AT5G19950.3 // AT3G06483.1 // ATCG00880.1 // AT4G35080.1 // AT4G15530.5 // AT4G15530.4 // AT4G15530.3 // AT4G15530.2 // AT4G15530.1 // AT5G62500.1 // AT1G67230.1 // AT2G13440.1 // AT4G35080.2 // ATCG01260.1 // AT1G54990.1 // AT5G19950.1 // AT5G35630.1 // AT1G63130.1 // AT1G63080.1 // AT2G47020.1 // AT2G04842.1 // AT5G43460.1 // AT2G45990.1 // AT5G18…
GO:0005737	C	cytoplasm	0.93	1	// AT1G52590.1 // AT1G79750.1 // AT5G19950.2 // AT5G19950.3 // AT3G06483.1 // AT5G18590.2 // ATCG00880.1 // AT4G35080.1 // AT4G15530.5 // AT4G15530.4 // AT4G15530.3 // AT4G15530.2 // AT4G15530.1 // AT5G62500.1 // AT1G67230.1 // AT2G13440.1 // AT4G35080.2 // ATCG01260.1 // AT1G54990.1 // AT5G19950.1 // AT5G35630.1 // AT1G63130.1 // AT1G63080.1 // AT2G47020.1 // AT2G47020.2 // AT2G04842.1 // AT5G43…
GO:0044425	C	membrane part	0.92	1	// AT4G35080.1 // AT5G41300.1 // AT4G28660.1 // AT4G35080.2 // AT2G46890.1
GO:0017076	F	purine nucleotide binding	0.91	1	// AT3G23890.1 // AT5G37450.1 // AT1G50990.1 // AT3G06483.1 // AT2G13440.1 // AT5G48600.1 // AT3G28690.1
GO:0043169	F	cation binding	0.9	1	// AT4G36860.1 // AT3G04200.1 // AT3G60080.1 // AT4G35080.1 // AT4G35080.2 // AT1G02410.1 // AT2G21840.1 // AT2G02850.1 // AT5G58610.1
GO:0000166	F	nucleotide binding	0.9	1	// AT5G64630.1 // AT5G64630.3 // AT3G23890.1 // AT5G37450.1 // AT1G50990.1 // AT3G06483.1 // AT5G64630.2 // AT2G13440.1 // AT5G48600.1 // AT3G28690.1
GO:0043167	F	ion binding	0.9	1	// AT4G36860.1 // AT3G04200.1 // AT3G60080.1 // AT4G35080.1 // AT4G35080.2 // AT1G02410.1 // AT2G21840.1 // AT2G02850.1 // AT5G58610.1
GO:0012505	C	endomembrane system	0.9	1	// AT1G52050.1 // AT5G37450.1 // AT5G38610.1 // AT5G13500.1 // AT5G13500.3 // AT5G25410.1 // AT3G04200.1 // AT2G03750.1 // AT2G46890.1 // AT5G38540.1 // AT5G13500.2 // AT1G52070.1 // AT1G52060.1 // AT3G43740.1 // AT5G58610.1 // AT3G60730.1
GO:0009628	P	response to abiotic stimulus	0.89	1	// AT5G62500.1 // AT3G07740.1 // AT3G07740.2 // AT3G07740.3 // AT1G54990.1 // AT5G08620.1
GO:0005886	C	plasma membrane	0.89	1	// AT3G13910.1 // AT1G61560.1 // AT5G24810.1 // AT4G10840.1 // AT3G28690.1 // AT4G36860.1
GO:0016787	F	hydrolase activity	0.87	1	// AT1G68560.1 // AT1G01040.1 // AT1G52500.1 // AT1G12430.1 // AT4G31150.2 // AT4G31150.1 // AT5G38610.1 // AT3G62260.2 // AT3G62260.1 // AT3G23890.1 // AT4G28710.1 // AT1G02800.1 // AT1G52500.2 // AT4G33620.1 // AT2G35320.1 // AT5G08620.1 // AT3G60730.1
GO:0046872	F	metal ion binding	0.87	1	// AT4G36860.1 // AT3G04200.1 // AT3G60080.1 // AT4G35080.1 // AT4G35080.2 // AT1G02410.1 // AT2G21840.1 // AT2G02850.1 // AT5G58610.1
GO:0046914	F	transition metal ion binding	0.87	1	// AT4G36860.1 // AT3G04200.1 // AT3G60080.1 // AT1G02410.1 // AT2G21840.1 // AT2G02850.1 // AT5G58610.1
GO:0032559	F	adenyl ribonucleotide binding	0.86	1	// AT3G23890.1 // AT5G37450.1 // AT1G50990.1 // AT3G06483.1 // AT5G48600.1 // AT3G28690.1
GO:0005524	F	ATP binding	0.85	1	// AT3G23890.1 // AT5G37450.1 // AT1G50990.1 // AT3G06483.1 // AT5G48600.1 // AT3G28690.1
GO:0006464	P	protein modification process	0.81	1	// AT5G37450.1 // AT3G62260.2 // AT1G50990.1 // AT3G62260.1 // AT2G35320.1 // AT3G28690.1 // AT5G03640.1
GO:0030554	F	adenyl nucleotide binding	0.8	1	// AT3G23890.1 // AT5G37450.1 // AT1G50990.1 // AT3G06483.1 // AT2G13440.1 // AT5G48600.1 // AT3G28690.1
GO:0016491	F	oxidoreductase activity	0.8	1	// AT1G79750.1 // AT2G46890.1 // AT1G01590.1 // AT2G37760.4 // AT1G23020.1 // AT2G37760.1 // AT2G37760.3
GO:0001882	F	nucleoside binding	0.8	1	// AT3G23890.1 // AT5G37450.1 // AT1G50990.1 // AT3G06483.1 // AT2G13440.1 // AT5G48600.1 // AT3G28690.1
GO:0001883	F	purine nucleoside binding	0.8	1	// AT3G23890.1 // AT5G37450.1 // AT1G50990.1 // AT3G06483.1 // AT2G13440.1 // AT5G48600.1 // AT3G28690.1
GO:0043412	P	macromolecule modification	0.79	1	// AT5G37450.1 // AT3G62260.2 // AT1G50990.1 // AT3G62260.1 // AT2G13440.1 // AT2G35320.1 // AT3G28690.1 // AT5G03640.1
GO:0009536	C	plastid	0.75	1	// AT4G15530.5 // AT4G15530.4 // AT1G52590.1 // AT4G15530.2 // AT4G15530.1 // AT1G79750.1 // ATCG01260.1 // AT4G35080.1 // AT5G60370.1 // AT2G13440.1 // AT4G35080.2 // ATCG00880.1 // AT5G35630.1 // AT2G45990.1 // AT2G04842.1 // AT4G15530.3
GO:0005515	F	protein binding	0.74	1	// AT5G64630.1 // AT1G01040.1 // AT5G64630.2 // AT4G00850.1 // AT4G15410.1 // AT1G61560.1 // AT5G62500.1 // AT5G64630.3 // AT3G60080.1 // AT5G39610.1 // AT1G01160.1 // AT1G52040.1 // AT2G21840.1 // AT3G43740.1 // AT1G30490.1 // AT5G58610.1
GO:0043687	P	post-translational protein modification	0.65	1	// AT5G37450.1 // AT3G62260.2 // AT1G50990.1 // AT3G62260.1 // AT2G35320.1 // AT3G28690.1 // AT5G03640.1
GO:0009507	C	chloroplast	0.63	1	// AT4G15530.5 // AT4G15530.4 // AT1G52590.1 // AT4G15530.2 // AT4G15530.1 // AT1G79750.1 // ATCG01260.1 // AT4G35080.1 // AT5G60370.1 // AT2G13440.1 // AT4G35080.2 // ATCG00880.1 // AT5G35630.1 // AT2G45990.1 // AT2G04842.1 // AT4G15530.3
GO:0016043	P	cellular component organization	0.59	1	// AT5G64630.1 // AT5G64630.3 // AT5G64630.2 // AT2G47020.1 // AT2G47020.2 // AT1G67230.1 // AT3G03810.1
GO:0016462	F	pyrophosphatase activity	0.59	1	// AT1G01040.1 // AT3G23890.1 // AT1G12430.1 // AT5G08620.1 // AT4G28710.1
GO:0016301	F	kinase activity	0.56	1	// AT4G15530.5 // AT4G15530.4 // AT5G37450.1 // AT4G15530.2 // AT4G15530.1 // AT1G50990.1 // AT3G06483.1 // AT3G28690.1 // AT4G15530.3 // AT5G03640.1
GO:0017111	F	nucleoside-triphosphatase activity	0.54	1	// AT1G01040.1 // AT3G23890.1 // AT1G12430.1 // AT5G08620.1 // AT4G28710.1
GO:0016740	F	transferase activity	0.4	1	// AT3G06483.1 // AT1G66700.3 // AT1G66700.1 // AT5G58610.1 // AT4G15530.5 // AT4G15530.4 // AT5G37450.1 // AT4G15530.2 // AT4G15530.1 // AT2G03750.1 // AT3G44870.1 // AT1G15125.1 // AT1G17000.1 // AT3G28690.1 // AT5G15810.1 // AT1G66720.1 // AT4G15530.3 // AT3G15530.2 // AT1G50990.1 // AT1G66690.1 // AT3G02320.1 // AT5G03640.1
GO:0006950	P	response to stress	0.36	1	// AT5G64630.1 // AT5G64630.2 // AT1G01040.1 // AT1G61560.1 // AT4G31150.2 // AT4G31150.1 // AT1G52500.2 // AT1G52500.1 // AT5G46470.1 // AT5G64630.3 // AT3G07740.1 // AT3G07740.2 // AT3G07740.3 // AT5G39610.1 // AT1G52040.1 // AT5G08620.1
GO:0006996	P	organelle organization	0.36	1	// AT5G64630.1 // AT3G03810.1 // AT5G64630.3 // AT5G64630.2 // AT1G67230.1
GO:0051704	P	multi-organism process	0.35	1	// AT1G01040.1 // AT1G61560.1 // AT5G46470.1 // AT1G02800.1 // AT3G03810.1 // AT2G02850.1
GO:0003723	F	RNA binding	0.35	1	// AT1G01040.1 // AT5G15810.1 // AT1G16800.1 // AT5G08620.1 // AT3G02320.1 // ATCG00880.1 // ATCG01260.1 // AT2G28350.1 // AT4G30080.1 // AT5G58610.1
GO:0044446	C	intracellular organelle part	0.32	1	// AT5G64630.1 // AT1G01040.1 // AT5G64630.2 // AT1G52590.1 // AT3G05690.1 // AT2G28510.1 // AT3G20910.1 // AT5G62500.1 // AT5G64630.3 // AT5G12840.2 // AT4G12080.1 // AT5G12840.1 // AT2G45990.1 // AT5G12840.4 // AT5G12840.3 // AT5G06510.1 // AT5G06510.2 // AT5G06510.3
GO:0044422	C	organelle part	0.32	1	// AT5G64630.1 // AT1G01040.1 // AT5G64630.2 // AT1G52590.1 // AT3G05690.1 // AT2G28510.1 // AT3G20910.1 // AT5G62500.1 // AT5G64630.3 // AT5G12840.2 // AT4G12080.1 // AT5G12840.1 // AT2G45990.1 // AT5G12840.4 // AT5G12840.3 // AT5G06510.1 // AT5G06510.2 // AT5G06510.3
GO:0005739	C	mitochondrion	0.27	1	// AT1G63130.1 // AT5G19950.1 // AT5G19950.2 // AT5G19950.3 // AT2G47020.1 // AT3G06483.1 // AT4G12080.1 // AT2G04842.1 // AT5G35630.1 // AT1G63080.1
GO:0016310	P	phosphorylation	0.23	1	// AT4G15530.5 // AT4G15530.4 // AT5G37450.1 // AT4G15530.2 // AT4G15530.1 // AT1G50990.1 // AT3G28690.1 // AT4G15530.3 // AT5G03640.1
GO:0005829	C	cytosol	0.21	1	// AT4G15530.5 // AT4G15530.4 // AT4G15530.3 // AT4G15530.2 // AT4G15530.1 // AT5G18590.2 // AT5G18590.1 // AT1G67230.1
GO:0032991	C	macromolecular complex	0.19	1	// AT5G64630.1 // AT5G64630.2 // AT5G64630.3 // AT3G23890.1 // AT3G05690.1 // AT3G62260.2 // AT3G62260.1 // AT5G62500.1 // AT5G12840.2 // AT4G28660.1 // AT3G20910.1 // AT5G12840.1 // AT5G12840.4 // AT5G12840.3 // AT5G06510.1 // AT5G06510.2 // AT5G06510.3
GO:0007165	P	signal transduction	0.081	0.5	// AT2G32460.1 // AT2G21840.1 // AT3G11440.1 // AT1G56010.2 // AT1G56010.1 // AT1G77850.1 // AT5G06100.3 // AT2G32460.2 // AT3G43740.1 // AT2G28350.1 // AT5G06100.2 // AT5G06100.1
GO:0006793	P	phosphorus metabolic process	0.065	0.4	// AT4G15530.5 // AT4G15530.4 // AT5G37450.1 // AT4G15530.2 // AT4G15530.1 // AT3G62260.2 // AT1G50990.1 // AT3G62260.1 // AT2G35320.1 // AT3G28690.1 // AT4G15530.3 // AT5G03640.1
GO:0006796	P	phosphate metabolic process	0.064	0.4	// AT4G15530.5 // AT4G15530.4 // AT5G37450.1 // AT4G15530.2 // AT4G15530.1 // AT3G62260.2 // AT1G50990.1 // AT3G62260.1 // AT2G35320.1 // AT3G28690.1 // AT4G15530.3 // AT5G03640.1
GO:0048519	P	negative regulation of biological process	0.059	0.37	// AT1G01040.1 // AT3G17185.2 // AT3G17185.1 // AT5G57735.1 // AT3G20910.1 // AT3G15170.1
GO:0009737	P	response to abscisic acid stimulus	0.032	0.2	// AT5G06100.3 // AT2G32460.1 // AT2G32460.2 // AT2G28350.1 // AT5G06100.2 // AT5G06100.1
GO:0043933	P	macromolecular complex subunit organization	0.017	0.11	// AT5G64630.1 // AT5G64630.3 // AT5G64630.2 // AT2G47020.1 // AT2G47020.2
GO:0009892	P	negative regulation of metabolic process	0.017	0.11	// AT1G01040.1 // AT3G20910.1 // AT3G17185.2 // AT5G57735.1 // AT3G17185.1
GO:0034621	P	cellular macromolecular complex subunit organization	0.014	0.089	// AT5G64630.1 // AT5G64630.3 // AT5G64630.2 // AT2G47020.1 // AT2G47020.2
GO:0010605	P	negative regulation of macromolecule metabolic process	0.013	0.083	// AT1G01040.1 // AT3G20910.1 // AT3G17185.2 // AT5G57735.1 // AT3G17185.1
GO:0033554	P	cellular response to stress	0.013	0.085	// AT5G64630.1 // AT5G64630.3 // AT5G64630.2 // AT4G31150.2 // AT4G31150.1 // AT1G52500.2 // AT1G52500.1
GO:0043234	C	protein complex	0.009	0.061	// AT5G64630.1 // AT5G64630.2 // AT5G64630.3 // AT3G23890.1 // AT3G05690.1 // AT3G62260.2 // AT3G62260.1 // AT5G62500.1 // AT5G12840.2 // AT4G28660.1 // AT3G20910.1 // AT5G12840.1 // AT5G12840.4 // AT5G12840.3 // AT5G06510.1 // AT5G06510.2 // AT5G06510.3
GO:0010629	P	negative regulation of gene expression	0.0084	0.055	// AT1G01040.1 // AT3G20910.1 // AT3G17185.2 // AT5G57735.1 // AT3G17185.1
GO:0048583	P	regulation of response to stimulus	0.0069	0.046	// AT5G06100.3 // AT5G06100.2 // AT5G06100.1 // AT2G32460.2 // AT2G32460.1
GO:0050896	P	response to stimulus	0.0063	0.042	// AT1G01040.1 // AT4G31150.2 // AT4G31150.1 // AT1G52500.2 // AT1G52500.1 // AT3G11440.1 // AT1G02800.1 // AT1G52040.1 // AT5G58610.1 // AT4G32880.1 // AT5G62500.1 // AT1G56010.1 // AT1G56010.2 // AT3G07740.1 // AT3G07740.2 // AT3G07740.3 // AT5G64630.1 // AT1G54990.1 // AT4G30080.1 // AT5G37020.1 // AT5G46470.1 // AT2G28350.1 // AT2G32460.2 // AT5G64630.2 // AT5G37020.2 // AT2G47750.1 // AT1G30…
GO:0006259	P	DNA metabolic process	0.0042	0.028	// AT5G64630.1 // AT5G64630.3 // AT3G23890.1 // AT4G31150.2 // AT4G31150.1 // AT1G52500.2 // AT1G52500.1 // AT5G64630.2
GO:0007242	P	intracellular signaling cascade	0.003	0.021	// AT2G32460.1 // AT3G11440.1 // AT1G56010.2 // AT1G56010.1 // AT1G77850.1 // AT5G06100.3 // AT2G32460.2 // AT2G21840.1 // AT2G28350.1 // AT5G06100.2 // AT5G06100.1
GO:0010646	P	regulation of cell communication	0.0016	0.011	// AT5G06100.3 // AT5G06100.2 // AT5G06100.1 // AT2G32460.2 // AT2G32460.1
GO:0009966	P	regulation of signal transduction	0.0014	0.0098	// AT5G06100.3 // AT5G06100.2 // AT5G06100.1 // AT2G32460.2 // AT2G32460.1
GO:0044464	C	cell part	0.0014	0.01	// AT1G01040.1 // AT1G52150.1 // AT1G52150.3 // AT1G52150.2 // AT3G62260.2 // AT5G60690.1 // AT5G25410.1 // AT3G15270.1 // AT5G58610.1 // AT5G06510.2 // AT5G06510.3 // AT5G37450.1 // AT3G05690.1 // AT1G52060.1 // AT4G28660.1 // AT5G35630.1 // AT1G52070.1 // AT5G50570.1 // AT5G50570.2 // AT3G60730.1 // AT1G68560.1 // AT3G62260.1 // AT1G63130.1 // AT4G00850.1 // AT2G47020.1 // AT2G47020.2 // AT1G52…
GO:0005623	C	cell	0.0014	0.01	// AT1G01040.1 // AT1G52150.1 // AT1G52150.3 // AT1G52150.2 // AT3G62260.2 // AT5G60690.1 // AT5G25410.1 // AT3G15270.1 // AT5G58610.1 // AT5G06510.2 // AT5G06510.3 // AT5G37450.1 // AT3G05690.1 // AT1G52060.1 // AT4G28660.1 // AT5G35630.1 // AT1G52070.1 // AT5G50570.1 // AT5G50570.2 // AT3G60730.1 // AT1G68560.1 // AT3G62260.1 // AT1G63130.1 // AT4G00850.1 // AT2G47020.1 // AT2G47020.2 // AT1G52…
GO:0042221	P	response to chemical stimulus	0.0013	0.0092	// AT1G01040.1 // AT1G52500.2 // AT1G52500.1 // AT3G11440.1 // AT5G58610.1 // AT4G32880.1 // AT1G56010.1 // AT1G56010.2 // AT1G54990.1 // AT4G30080.1 // AT5G37020.1 // AT5G37020.2 // AT2G28350.1 // AT2G32460.2 // AT2G47750.1 // AT1G30330.1 // AT1G30330.2 // AT2G32460.1 // AT2G37760.1 // AT1G77850.1 // AT5G39610.1 // AT5G06100.3 // AT5G06100.2 // AT5G06100.1 // AT5G08620.1
GO:0048518	P	positive regulation of biological process	0.0013	0.0094	// AT2G33810.1 // AT4G32880.1 // AT2G32460.1 // AT2G32460.2 // AT5G06100.3 // AT5G06100.2 // AT5G06100.1
GO:0048522	P	positive regulation of cellular process	0.00064	0.0046	// AT4G32880.1 // AT2G32460.1 // AT2G32460.2 // AT5G06100.3 // AT5G06100.2 // AT5G06100.1
GO:0009739	P	response to gibberellin stimulus	0.00057	0.0041	// AT3G11440.1 // AT2G32460.1 // AT2G32460.2 // AT5G06100.3 // AT5G06100.2 // AT5G06100.1
GO:0006974	P	response to DNA damage stimulus	0.00055	0.004	// AT5G64630.1 // AT5G64630.3 // AT5G64630.2 // AT4G31150.2 // AT4G31150.1 // AT1G52500.2 // AT1G52500.1
GO:0048869	P	cellular developmental process	0.00048	0.0035	// AT5G64630.1 // AT5G64630.3 // AT5G64630.2 // AT3G60460.1 // AT4G32880.1 // AT5G60690.1 // AT3G11440.1 // AT5G06100.2 // AT5G06100.3 // AT3G03810.1 // AT5G06100.1
GO:0006281	P	DNA repair	0.00046	0.0034	// AT5G64630.1 // AT5G64630.3 // AT5G64630.2 // AT4G31150.2 // AT4G31150.1 // AT1G52500.2 // AT1G52500.1
GO:0009965	P	leaf morphogenesis	0.00037	0.0027	// AT5G64630.1 // AT5G64630.3 // AT5G64630.2 // AT1G52150.1 // AT1G52150.3 // AT1G52150.2
GO:0010033	P	response to organic substance	0.00031	0.0023	// AT1G30330.1 // AT5G37020.1 // AT1G01040.1 // AT1G30330.2 // AT2G32460.1 // AT4G32880.1 // AT3G11440.1 // AT1G56010.2 // AT1G56010.1 // AT1G77850.1 // AT5G06100.3 // AT2G32460.2 // AT5G37020.2 // AT1G54990.1 // AT2G47750.1 // AT2G28350.1 // AT5G06100.2 // AT5G06100.1 // AT4G30080.1 // AT5G58610.1
GO:0022622	P	root system development	0.00024	0.0018	// AT5G18560.1 // AT1G56010.1 // AT1G56010.2 // AT1G77850.1 // AT3G15170.1 // AT2G28350.1 // AT4G30080.1 // AT2G42430.1
GO:0048364	P	root development	0.00024	0.0018	// AT5G18560.1 // AT1G56010.1 // AT1G56010.2 // AT1G77850.1 // AT3G15170.1 // AT2G28350.1 // AT4G30080.1 // AT2G42430.1
GO:0031974	C	membrane-enclosed lumen	0.00019	0.0016	// AT1G01040.1 // AT3G05690.1 // AT2G28510.1 // AT3G20910.1 // AT5G12840.2 // AT4G12080.1 // AT5G12840.1 // AT5G12840.4 // AT5G12840.3 // AT5G06510.1 // AT5G06510.2 // AT5G06510.3
GO:0043233	C	organelle lumen	0.00017	0.0015	// AT1G01040.1 // AT3G05690.1 // AT2G28510.1 // AT3G20910.1 // AT5G12840.2 // AT4G12080.1 // AT5G12840.1 // AT5G12840.4 // AT5G12840.3 // AT5G06510.1 // AT5G06510.2 // AT5G06510.3
GO:0070013	C	intracellular organelle lumen	0.00017	0.0015	// AT1G01040.1 // AT3G05690.1 // AT2G28510.1 // AT3G20910.1 // AT5G12840.2 // AT4G12080.1 // AT5G12840.1 // AT5G12840.4 // AT5G12840.3 // AT5G06510.1 // AT5G06510.2 // AT5G06510.3
GO:0009887	P	organ morphogenesis	0.00016	0.0013	// AT5G64630.1 // AT5G64630.3 // AT5G53950.1 // AT1G52150.1 // AT1G52150.3 // AT1G52150.2 // AT5G64630.2 // AT3G15170.1
GO:0070887	P	cellular response to chemical stimulus	0.00015	0.0012	// AT1G01040.1 // AT2G32460.1 // AT3G11440.1 // AT1G56010.2 // AT1G56010.1 // AT1G77850.1 // AT5G06100.3 // AT2G32460.2 // AT2G28350.1 // AT5G06100.2 // AT5G06100.1
GO:0009719	P	response to endogenous stimulus	0.00014	0.0011	// AT1G30330.1 // AT5G37020.1 // AT5G37020.2 // AT1G30330.2 // AT2G32460.1 // AT4G32880.1 // AT3G11440.1 // AT1G56010.2 // AT1G56010.1 // AT1G77850.1 // AT5G06100.3 // AT2G32460.2 // AT1G54990.1 // AT2G47750.1 // AT2G28350.1 // AT5G06100.2 // AT5G06100.1 // AT4G30080.1
GO:0048440	P	carpel development	0.00011	0.00086	// AT1G30490.1 // AT1G52150.1 // AT2G34710.1 // AT1G52150.3 // AT1G52150.2

## Sheet: Table S5
Table S5 The list of predicted phasiRNA region in the Col-0 and V592-infected roots.
Control specific					V592 specific					Common
Chromosome	strand	start	end		Chromosome	strand	start	end		Chromosome	strand	start	end
CHR1v01212004	+	17886549	17886653		CHR1v01212004	+	18553109	18553192		CHR1v01212004	-	18553191	18553337
CHR1v01212004	+	17886552	17886656		CHR1v01212004	+	18553214	18553297		CHR1v01212004	+	23305896	23305979
CHR1v01212004	+	17886555	17886659		CHR1v01212004	-	20983255	20983338		CHR1v01212004	-	23390144	23390227
CHR1v01212004	+	17886558	17886662		CHR1v01212004	-	23182103	23182186		CHR1v01212004	-	23393735	23393818
CHR1v01212004	+	17886561	17886665		CHR1v01212004	+	23303375	23303458		CHR2v01212004	-	11728938	11729168
CHR1v01212004	+	17886564	17886668		CHR1v01212004	+	23303956	23304039		CHR2v01212004	-	11728998	11729081
CHR1v01212004	+	17886567	17886671		CHR1v01212004	+	23305855	23305980		CHR2v01212004	+	11729003	11729086
CHR1v01212004	+	23303331	23303477		CHR1v01212004	-	23390145	23390249		CHR2v01212004	-	16544703	16544828
CHR1v01212004	+	23417119	23417265		CHR1v01212004	-	23393736	23393840		CHR2v01212004	-	16544788	16544934
CHR1v01212004	+	23423670	23423774		CHR1v01212004	+	23417119	23417223		CHR2v01212004	-	16544852	16544977
CHR2v01212004	+	11728855	11728938		CHR1v01212004	+	23417744	23417827		CHR2v01212004	-	16546869	16547078
CHR2v01212004	-	11728906	11728989		CHR1v01212004	-	23493132	23493215		CHR2v01212004	-	16546879	16547004
CHR2v01212004	-	11728916	11729083		CHR2v01212004	-	11728958	11729083		CHR2v01212004	+	3725	3808
CHR2v01212004	+	16544838	16544921		CHR2v01212004	+	15172711	15172962		CHR2v01212004	+	3750	4169
CHR2v01212004	+	16546764	16546952		CHR2v01212004	+	15172721	15172804		CHR2v01212004	+	3757	3840
CHR2v01212004	-	16546868	16546993		CHR2v01212004	+	15172732	15172815		CHR2v01212004	+	3828	4310
CHR2v01212004	+	16546891	16546974		CHR2v01212004	+	15172849	15172932		CHR2v01212004	+	3849	3932
CHR2v01212004	+	16546893	16546997		CHR2v01212004	+	15172856	15172939		CHR2v01212004	+	3902	4384
CHR2v01212004	-	16546909	16546992		CHR2v01212004	+	15172857	15172961		CHR2v01212004	+	3946	4176
CHR2v01212004	+	16546913	16547059		CHR2v01212004	+	15172858	15172941		CHR2v01212004	+	3980	4462
CHR2v01212004	+	19705103	19705354		CHR2v01212004	+	15172980	15173105		CHR2v01212004	+	3988	4071
CHR2v01212004	+	19705104	19705355		CHR2v01212004	+	15173053	15173136		CHR2v01212004	+	4046	4528
CHR2v01212004	-	19705105	19705356		CHR2v01212004	+	15173170	15173253		CHR2v01212004	+	4048	4530
CHR2v01212004	+	19705107	19705358		CHR2v01212004	+	16544738	16544821		CHR2v01212004	+	4069	4551
CHR2v01212004	+	19705110	19705340		CHR2v01212004	+	16544854	16544958		CHR2v01212004	+	4091	4174
CHR2v01212004	+	19705111	19705341		CHR2v01212004	+	16546763	16546867		CHR2v01212004	+	4200	4283
CHR2v01212004	-	19705112	19705342		CHR2v01212004	+	16546827	16546931		CHR2v01212004	+	4202	4285
CHR2v01212004	+	19705114	19705344		CHR2v01212004	-	16546835	16546918		CHR2v01212004	+	4217	4594
CHR2v01212004	+	19705117	19705347		CHR2v01212004	-	16546868	16546972		CHR2v01212004	+	4259	4741
CHR2v01212004	+	19705118	19705348		CHR2v01212004	+	16546934	16547059		CHR2v01212004	+	4269	4352
CHR2v01212004	-	19705119	19705349		CHR2v01212004	+	19705109	19705339		CHR2v01212004	+	4280	4762
CHR2v01212004	+	19705121	19705351		CHR2v01212004	+	19705116	19705346		CHR2v01212004	+	4328	4810
CHR2v01212004	+	1993737	1993820		CHR2v01212004	+	19705123	19705353		CHR2v01212004	+	4333	4416
CHR2v01212004	+	3219	3302		CHR2v01212004	+	1993744	1993827		CHR2v01212004	+	4349	4831
CHR2v01212004	+	3716	3841		CHR2v01212004	+	3717	3800		CHR2v01212004	+	4370	4852
CHR2v01212004	+	3718	3801		CHR2v01212004	+	3721	3804		CHR2v01212004	+	4391	4873
CHR2v01212004	+	3730	4170		CHR2v01212004	+	3724	3933		CHR2v01212004	+	4409	4891
CHR2v01212004	+	3731	4150		CHR2v01212004	+	3726	3809		CHR2v01212004	+	4412	4894
CHR2v01212004	+	3740	3844		CHR2v01212004	+	3743	4015		CHR2v01212004	+	4433	4516
CHR2v01212004	+	3745	3933		CHR2v01212004	+	3749	4147		CHR2v01212004	+	4437	4520
CHR2v01212004	+	3747	4040		CHR2v01212004	+	3751	4170		CHR2v01212004	+	4439	4522
CHR2v01212004	+	3748	3831		CHR2v01212004	+	3752	4150		CHR2v01212004	+	4672	5154
CHR2v01212004	+	3749	4105		CHR2v01212004	+	3754	3837		CHR2v01212004	+	4693	5175
CHR2v01212004	+	3751	3834		CHR2v01212004	+	3791	3874		CHR2v01212004	+	4714	5196
CHR2v01212004	+	3753	4151		CHR2v01212004	+	3792	3875		CHR2v01212004	+	4780	4863
CHR2v01212004	+	3756	3839		CHR2v01212004	+	3806	4288		CHR2v01212004	+	4813	4896
CHR2v01212004	+	3770	3853		CHR2v01212004	+	3816	4298		CHR2v01212004	+	4919	5191
CHR2v01212004	+	3808	4290		CHR2v01212004	+	3825	4286		CHR2v01212004	+	4940	5023
CHR2v01212004	+	3818	4300		CHR2v01212004	+	3826	4287		CHR2v01212004	+	5047	5130
CHR2v01212004	+	3827	4015		CHR2v01212004	+	3827	4309		CHR2v01212004	+	5048	5131
CHR2v01212004	+	3830	4144		CHR2v01212004	+	3831	4040		CHR2v01212004	+	5052	5513
CHR2v01212004	+	3836	3919		CHR2v01212004	+	3835	3918		CHR2v01212004	+	5391	5873
CHR2v01212004	+	3839	4321		CHR2v01212004	+	3846	3929		CHR2v01212004	+	5412	5894
CHR2v01212004	+	3848	4330		CHR2v01212004	+	3847	3930		CHR2v01212004	+	5779	5904
CHR2v01212004	+	3851	3934		CHR2v01212004	+	3857	4339		CHR2v01212004	+	5783	6265
CHR2v01212004	+	3859	4341		CHR2v01212004	+	3858	3941		CHR2v01212004	+	5791	5895
CHR2v01212004	+	3860	4342		CHR2v01212004	+	3859	4173		CHR2v01212004	+	5792	5896
CHR2v01212004	+	3869	4351		CHR2v01212004	+	3863	3967		CHR2v01212004	+	5793	5897
CHR2v01212004	+	3874	3978		CHR2v01212004	+	3874	4356		CHR2v01212004	+	5797	5901
CHR2v01212004	+	3875	3958		CHR2v01212004	+	3878	4360		CHR2v01212004	+	5798	5902
CHR2v01212004	+	3880	4362		CHR2v01212004	+	3887	3970		CHR2v01212004	+	5807	6289
CHR2v01212004	+	3881	4363		CHR2v01212004	+	3896	4294		CHR2v01212004	+	5817	5900
CHR2v01212004	+	3890	4372		CHR2v01212004	+	3897	3980		CHR2v01212004	+	5828	6310
CHR2v01212004	+	3901	4383		CHR2v01212004	+	3906	4388		CHR2v01212004	+	6179	6661
CHR2v01212004	+	3911	4393		CHR2v01212004	+	3918	4001		CHR2v01212004	+	6187	6648
CHR2v01212004	+	3918	4400		CHR2v01212004	+	3922	4404		CHR2v01212004	+	6200	6682
CHR2v01212004	+	3921	4004		CHR2v01212004	+	3923	4006		CHR2v01212004	+	6202	6285
CHR2v01212004	+	3922	4005		CHR2v01212004	+	3927	4409		CHR2v01212004	+	6221	6703
CHR2v01212004	+	3923	4405		CHR2v01212004	+	3943	4026		CHR2v01212004	+	6242	6724
CHR2v01212004	+	3939	4421		CHR2v01212004	+	3948	4031		CHR2v01212004	+	6261	6743
CHR2v01212004	+	3941	4360		CHR2v01212004	+	3979	4461		CHR2v01212004	+	6262	6744
CHR2v01212004	+	3944	4426		CHR2v01212004	+	4000	4482		CHR2v01212004	+	6283	6765
CHR2v01212004	+	3945	4364		CHR2v01212004	+	4021	4503		CHR2v01212004	+	6323	6406
CHR2v01212004	+	3987	4070		CHR2v01212004	+	4023	4463		CHR2v01212004	+	6346	6429
CHR2v01212004	+	4003	4086		CHR2v01212004	+	4024	4107		CHR2v01212004	+	6347	6430
CHR2v01212004	+	4090	4173		CHR2v01212004	+	4028	4426		CHR2v01212004	+	6491	6574
CHR2v01212004	+	4113	4196		CHR2v01212004	+	4042	4524		CHR2v01212004	+	6493	6975
CHR2v01212004	+	4199	4282		CHR2v01212004	+	4049	4531		CHR2v01212004	+	6502	6585
CHR2v01212004	+	4203	4412		CHR2v01212004	+	4053	4535		CHR2v01212004	+	6523	7005
CHR2v01212004	+	4204	4287		CHR2v01212004	+	4054	4137		CHR2v01212004	+	6524	7006
CHR2v01212004	+	4206	4646		CHR2v01212004	+	4063	4545		CHR2v01212004	+	6545	7027
CHR2v01212004	+	4247	4519		CHR2v01212004	+	4070	4552		CHR2v01212004	+	6615	6698
CHR2v01212004	+	4256	4717		CHR2v01212004	+	4074	4556		CHR2v01212004	+	6621	7082
CHR2v01212004	+	4258	4593		CHR2v01212004	+	4084	4167		CHR2v01212004	+	6667	6750
CHR2v01212004	+	4260	4595		CHR2v01212004	+	4095	4178		CHR2v01212004	+	6672	6755
CHR2v01212004	+	4301	4783		CHR2v01212004	+	4097	4180		CHR2v01212004	+	6837	7319
CHR2v01212004	+	4307	4705		CHR2v01212004	+	4205	4414		CHR2v01212004	+	6857	7339
CHR2v01212004	+	4312	4731		CHR2v01212004	+	4227	4646		CHR2v01212004	+	6858	7340
CHR2v01212004	+	4314593	4314676		CHR2v01212004	+	4252	4650		CHR2v01212004	+	6908	7012
CHR2v01212004	+	4320	4718		CHR2v01212004	+	4256	4591		CHR2v01212004	+	6991	7074
CHR2v01212004	+	4331	4414		CHR2v01212004	+	4305	4640		CHR2v01212004	+	7231	7314
CHR2v01212004	+	4388	4639		CHR2v01212004	+	4307	4789		CHR2v01212004	+	7275	7505
CHR2v01212004	+	4404	4487		CHR2v01212004	+	4308	4433		CHR2v01212004	+	7296	7379
CHR2v01212004	+	4428	4511		CHR2v01212004	+	4309	4413		CHR2v01212004	+	7561	8043
CHR2v01212004	+	4429	4638		CHR2v01212004	+	4312	4647		CHR2v01212004	+	7580	7663
CHR2v01212004	+	4438	4521		CHR2v01212004	+	4338	4820		CHR2v01212004	+	7583	7666
CHR2v01212004	+	4440	4523		CHR2v01212004	+	4347	4430		CHR2v01212004	+	7584	7667
CHR2v01212004	+	4441	4524		CHR2v01212004	+	4378	4860		CHR2v01212004	+	7839	8321
CHR2v01212004	+	4445	4864		CHR2v01212004	+	4383	4655		CHR2v01212004	+	7897	8085
CHR2v01212004	+	4490	4573		CHR2v01212004	+	4390	4515		CHR2v01212004	+	7924	8322
CHR2v01212004	+	4491	4973		CHR2v01212004	+	4404	4886		CHR2v01212004	+	7943	8299
CHR2v01212004	+	4509	4592		CHR2v01212004	+	4407	4595		CHR2v01212004	+	7966	8049
CHR2v01212004	+	4513	4995		CHR2v01212004	+	4411	4893		CHR2v01212004	+	7996	8142
CHR2v01212004	+	4529	4612		CHR2v01212004	+	4419	4502		CHR2v01212004	+	8006	8089
CHR2v01212004	+	4534	5016		CHR2v01212004	+	4426	4635		CHR2v01212004	+	8054	8137
CHR2v01212004	+	4536	4892		CHR2v01212004	+	4445	4885		CHR2v01212004	+	8057	8140
CHR2v01212004	+	4542	4625		CHR2v01212004	+	4452	4934		CHR2v01212004	+	8217	8615
CHR2v01212004	+	4557	4640		CHR2v01212004	+	4471	4554		CHR2v01212004	+	8218	8616
CHR2v01212004	+	4627	5025		CHR2v01212004	+	4473	4955		CHR2v01212004	+	8470	8763
CHR2v01212004	+	4629	5006		CHR2v01212004	+	4485	4967		CHR2v01212004	+	8518	8601
CHR2v01212004	+	4630	5007		CHR2v01212004	+	4494	4976		CHR2v01212004	+	8544	8627
CHR2v01212004	+	4631	4861		CHR2v01212004	+	4506	4589		CHR2v01212004	+	8545	8943
CHR2v01212004	+	4633	4716		CHR2v01212004	+	4507	4989		CHR2v01212004	+	8546	8629
CHR2v01212004	+	4650	4733		CHR2v01212004	+	4509	4991		CHR2v01212004	+	8608	8691
CHR2v01212004	+	4651	5133		CHR2v01212004	+	4515	4997		CHR2v01212004	+	8686	9105
CHR2v01212004	+	4666	5022		CHR2v01212004	+	4528	4611		CHR2v01212004	+	8711	8794
CHR2v01212004	+	4691	5173		CHR2v01212004	+	4530	5012		CHR2v01212004	+	8713	8796
CHR2v01212004	+	4708	4791		CHR2v01212004	+	4536	5018		CHR2v01212004	+	8749	8832
CHR2v01212004	+	4712	5194		CHR2v01212004	+	4543	5025		CHR2v01212004	+	8859	9341
CHR2v01212004	+	4727	5020		CHR2v01212004	+	4556	4639		CHR2v01212004	+	8900	8983
CHR2v01212004	+	4733	5215		CHR2v01212004	+	4611	5009		CHR2v01212004	+	8978	9103
CHR2v01212004	+	4737	5198		CHR2v01212004	+	4622	4957		CHR2v01212004	+	8980	9063
CHR2v01212004	+	4753	5235		CHR2v01212004	+	4628	4921		CHR2v01212004	+	9004	9087
CHR2v01212004	+	4754	5236		CHR2v01212004	+	4632	4715		CHR2v01212004	+	9415	9519
CHR2v01212004	+	4755	5195		CHR2v01212004	+	4649	4732		CHR3v01212004	+	13847653	13847736
CHR2v01212004	+	4774	5256		CHR2v01212004	+	4671	5153		CHR3v01212004	+	13860602	13860685
CHR2v01212004	+	4775	5257		CHR2v01212004	+	4673	4861		CHR3v01212004	+	13877775	13877858
CHR2v01212004	+	4776	4859		CHR2v01212004	+	4692	5174		CHR3v01212004	+	14203872	14203955
CHR2v01212004	+	4777	4860		CHR2v01212004	+	4713	5195		CHR3v01212004	+	14203963	14204067
CHR2v01212004	+	4779	4862		CHR2v01212004	+	4738	5199		CHR3v01212004	+	14208682	14208765
CHR2v01212004	+	4795	5277		CHR2v01212004	+	4754	5152		CHR3v01212004	+	14208707	14209126
CHR2v01212004	+	4796	5278		CHR2v01212004	+	4781	5200		CHR3v01212004	+	14208714	14208797
CHR2v01212004	+	4810	4893		CHR2v01212004	+	4807	4890		CHR3v01212004	+	14208785	14209267
CHR2v01212004	+	4812	5147		CHR2v01212004	+	4809	4892		CHR3v01212004	+	14208806	14208889
CHR2v01212004	+	4814	4897		CHR2v01212004	+	4812	5021		CHR3v01212004	+	14208859	14209341
CHR2v01212004	+	4816	4899		CHR2v01212004	+	4815	4898		CHR3v01212004	+	14208889	14208972
CHR2v01212004	+	4817	5299		CHR2v01212004	+	4842	5198		CHR3v01212004	+	14208903	14209175
CHR2v01212004	+	4838	4921		CHR2v01212004	+	4860	4943		CHR3v01212004	+	14208914	14208997
CHR2v01212004	+	4881	5300		CHR2v01212004	+	4885	4968		CHR3v01212004	+	14208937	14209419
CHR2v01212004	+	4882	4965		CHR2v01212004	+	4896	5378		CHR3v01212004	+	14208945	14209028
CHR2v01212004	+	4890	5015		CHR2v01212004	+	4900	5277		CHR3v01212004	+	14209003	14209485
CHR2v01212004	+	4912	5331		CHR2v01212004	+	4908	5390		CHR3v01212004	+	14209005	14209487
CHR2v01212004	+	4915	5019		CHR2v01212004	+	4911	5393		CHR3v01212004	+	14209026	14209508
CHR2v01212004	+	4921	5004		CHR2v01212004	+	4912	5016		CHR3v01212004	+	14209047	14209529
CHR2v01212004	+	4938	5021		CHR2v01212004	+	4914	5396		CHR3v01212004	+	14209048	14209530
CHR2v01212004	+	4943	5026		CHR2v01212004	+	4917	5399		CHR3v01212004	+	14209069	14209152
CHR2v01212004	+	5049	5132		CHR2v01212004	+	4918	5400		CHR3v01212004	+	14209094	14209576
CHR2v01212004	+	5050	5511		CHR2v01212004	+	4920	5402		CHR3v01212004	+	14209115	14209597
CHR2v01212004	+	5074	5157		CHR2v01212004	+	4921	5403		CHR3v01212004	+	14209159	14209242
CHR2v01212004	+	5087	5170		CHR2v01212004	+	4927	5010		CHR3v01212004	+	14209174	14209551
CHR2v01212004	+	5117	5200		CHR2v01212004	+	4932	5015		CHR3v01212004	+	14209216	14209698
CHR2v01212004	+	5172	5255		CHR2v01212004	+	4939	5022		CHR3v01212004	+	14209226	14209309
CHR2v01212004	+	5244	5516		CHR2v01212004	+	4941	5024		CHR3v01212004	+	14209237	14209719
CHR2v01212004	+	5246	5350		CHR2v01212004	+	5049	5510		CHR3v01212004	+	14209285	14209767
CHR2v01212004	+	5265	5348		CHR2v01212004	+	5050	5133		CHR3v01212004	+	14209290	14209373
CHR2v01212004	+	5292	5480		CHR2v01212004	+	5053	5136		CHR3v01212004	+	14209306	14209788
CHR2v01212004	+	5323	5406		CHR2v01212004	+	5066	5149		CHR3v01212004	+	14209327	14209809
CHR2v01212004	+	5348	5515		CHR2v01212004	+	5067	5150		CHR3v01212004	+	14209348	14209830
CHR2v01212004	+	5370	5453		CHR2v01212004	+	5109	5192		CHR3v01212004	+	14209366	14209848
CHR2v01212004	+	5394	5876		CHR2v01212004	+	5170	5253		CHR3v01212004	+	14209369	14209851
CHR2v01212004	+	5415	5498		CHR2v01212004	+	5191	5274		CHR3v01212004	+	14209394	14209477
CHR2v01212004	+	5429	5512		CHR2v01212004	+	5223	5516		CHR3v01212004	+	14209396	14209479
CHR2v01212004	+	5431	5514		CHR2v01212004	+	5240	5512		CHR3v01212004	+	14209629	14210111
CHR2v01212004	+	5781	6263		CHR2v01212004	+	5246	5434		CHR3v01212004	+	14209650	14210132
CHR2v01212004	+	5784	5888		CHR2v01212004	+	5247	5435		CHR3v01212004	+	14209671	14210153
CHR2v01212004	+	5785	5952		CHR2v01212004	-	5294	5377		CHR3v01212004	+	14209735	14209818
CHR2v01212004	+	5786	5953		CHR2v01212004	+	5296	5379		CHR3v01212004	+	14209737	14209820
CHR2v01212004	+	5796	6047		CHR2v01212004	-	5302	5385		CHR3v01212004	+	14209770	14209853
CHR2v01212004	+	5802	6284		CHR2v01212004	-	5305	5451		CHR3v01212004	+	14209795	14209878
CHR2v01212004	+	5804	5887		CHR2v01212004	-	5311	5394		CHR3v01212004	+	14209876	14210148
CHR2v01212004	+	5806	6288		CHR2v01212004	+	5312	5437		CHR3v01212004	+	14209988	14210470
CHR2v01212004	+	5823	6305		CHR2v01212004	+	5324	5407		CHR3v01212004	+	14210348	14210830
CHR2v01212004	+	5827	6309		CHR2v01212004	+	5325	5408		CHR3v01212004	+	14210369	14210851
CHR2v01212004	+	5850	6311		CHR2v01212004	+	5348	5494		CHR3v01212004	+	14210736	14210861
CHR2v01212004	+	5858	5962		CHR2v01212004	+	5350	5433		CHR3v01212004	+	14210740	14211222
CHR2v01212004	+	5865	5948		CHR2v01212004	+	5353	5436		CHR3v01212004	+	14210748	14210852
CHR2v01212004	+	5871	5954		CHR2v01212004	+	5356	5439		CHR3v01212004	+	14210749	14210853
CHR2v01212004	+	5922	6005		CHR2v01212004	+	5357	5440		CHR3v01212004	+	14210750	14210854
CHR2v01212004	+	6140	6475		CHR2v01212004	+	5390	5872		CHR3v01212004	+	14210754	14210858
CHR2v01212004	+	6181	6600		CHR2v01212004	+	5455	5538		CHR3v01212004	+	14210755	14210859
CHR2v01212004	+	6203	6286		CHR2v01212004	+	5741	5887		CHR3v01212004	+	14210761	14210844
CHR2v01212004	+	6210	6650		CHR2v01212004	+	5744	5953		CHR3v01212004	+	14210764	14211246
CHR2v01212004	+	6219	6596		CHR2v01212004	+	5765	6247		CHR3v01212004	+	14210774	14210857
CHR2v01212004	+	6229	6312		CHR2v01212004	+	5781	5864		CHR3v01212004	+	14210785	14211267
CHR2v01212004	+	6231	6314		CHR2v01212004	+	5782	6264		CHR3v01212004	+	14211136	14211618
CHR2v01212004	+	6238	6321		CHR2v01212004	+	5784	5867		CHR3v01212004	+	14211144	14211605
CHR2v01212004	+	6239	6721		CHR2v01212004	+	5786	6268		CHR3v01212004	+	14211157	14211639
CHR2v01212004	+	6241	6597		CHR2v01212004	+	5787	6269		CHR3v01212004	+	14211159	14211242
CHR2v01212004	+	6260	6742		CHR2v01212004	+	5789	5956		CHR3v01212004	+	14211178	14211660
CHR2v01212004	+	6263	6745		CHR2v01212004	+	5790	5915		CHR3v01212004	+	14211199	14211681
CHR2v01212004	+	6281	6763		CHR2v01212004	+	5794	5898		CHR3v01212004	+	14211218	14211700
CHR2v01212004	+	6282	6764		CHR2v01212004	+	5795	5962		CHR3v01212004	+	14211219	14211701
CHR2v01212004	+	6284	6766		CHR2v01212004	+	5796	6005		CHR3v01212004	+	14211240	14211722
CHR2v01212004	+	6302	6784		CHR2v01212004	+	5803	5886		CHR3v01212004	+	14211280	14211363
CHR2v01212004	+	6305	6787		CHR2v01212004	+	5808	5891		CHR3v01212004	+	14211303	14211386
CHR2v01212004	+	6326	6808		CHR2v01212004	+	5848	5931		CHR3v01212004	+	14211304	14211387
CHR2v01212004	+	6328	6411		CHR2v01212004	+	5852	6334		CHR3v01212004	+	14211448	14211531
CHR2v01212004	+	6345	6428		CHR2v01212004	+	6163	6645		CHR3v01212004	+	14211450	14211932
CHR2v01212004	+	6349	6432		CHR2v01212004	+	6164	6562		CHR3v01212004	+	14211459	14211542
CHR2v01212004	+	6445	6549		CHR2v01212004	+	6165	6584		CHR3v01212004	+	14211480	14211962
CHR2v01212004	+	6450	6533		CHR2v01212004	+	6180	6410		CHR3v01212004	+	14211481	14211963
CHR2v01212004	+	6472	6555		CHR2v01212004	+	6181	6663		CHR3v01212004	+	14211502	14211984
CHR2v01212004	+	6492	6974		CHR2v01212004	+	6182	6580		CHR3v01212004	+	14211572	14211655
CHR2v01212004	+	6494	6577		CHR2v01212004	+	6184	6666		CHR3v01212004	+	14211577	14212059
CHR2v01212004	+	6496	6579		CHR2v01212004	+	6185	6667		CHR3v01212004	+	14211624	14211707
CHR2v01212004	+	6498	6665		CHR2v01212004	+	6203	6685		CHR3v01212004	+	14211629	14211712
CHR2v01212004	+	6501	6584		CHR2v01212004	+	6205	6687		CHR3v01212004	+	14211794	14212276
CHR2v01212004	+	6503	6712		CHR2v01212004	+	6206	6688		CHR3v01212004	+	14211814	14212296
CHR2v01212004	+	6504	6986		CHR2v01212004	+	6219	6701		CHR3v01212004	+	14211815	14212297
CHR2v01212004	+	6525	7007		CHR2v01212004	+	6220	6702		CHR3v01212004	+	14211865	14212095
CHR2v01212004	+	6546	7028		CHR2v01212004	+	6222	6704		CHR3v01212004	+	14211886	14211969
CHR2v01212004	+	6566	7048		CHR2v01212004	+	6224	6307		CHR3v01212004	+	14211985	14212068
CHR2v01212004	+	6587	7069		CHR2v01212004	+	6225	6308		CHR3v01212004	+	14211991	14212074
CHR2v01212004	+	6599	7081		CHR2v01212004	+	6226	6309		CHR3v01212004	+	14212188	14212271
CHR2v01212004	+	6602	6979		CHR2v01212004	+	6228	6311		CHR3v01212004	+	14212253	14212336
CHR2v01212004	+	6614	6697		CHR2v01212004	+	6233	6316		CHR3v01212004	+	14212416	14212499
CHR2v01212004	+	6616	6720		CHR2v01212004	+	6237	6320		CHR3v01212004	+	14212516	14212998
CHR2v01212004	+	6617	6973		CHR2v01212004	+	6238	6720		CHR3v01212004	+	14212518	14213000
CHR2v01212004	+	6625	6897		CHR2v01212004	+	6240	6722		CHR3v01212004	+	14212536	14213018
CHR2v01212004	+	6642	6725		CHR2v01212004	+	6241	6723		CHR3v01212004	+	14212537	14213019
CHR2v01212004	+	6668	6751		CHR2v01212004	+	6243	6725		CHR3v01212004	+	14212539	14213021
CHR2v01212004	+	6673	6756		CHR2v01212004	+	6259	6741		CHR3v01212004	+	14212560	14213042
CHR2v01212004	+	6704	7186		CHR2v01212004	+	6271	6354		CHR3v01212004	+	14212562	14213044
CHR2v01212004	+	6707	6790		CHR2v01212004	+	6280	6762		CHR3v01212004	+	14212796	14213278
CHR2v01212004	+	6722	6805		CHR2v01212004	+	6282	6365		CHR3v01212004	+	14212881	14213279
CHR2v01212004	+	6816	7004		CHR2v01212004	+	6302	6763		CHR3v01212004	+	14212900	14213256
CHR2v01212004	+	6836	7213		CHR2v01212004	+	6322	6405		CHR3v01212004	+	14212923	14213006
CHR2v01212004	+	6854	7336		CHR2v01212004	+	6328	6747		CHR3v01212004	+	14212962	14213045
CHR2v01212004	+	6878	6961		CHR2v01212004	+	6329	6748		CHR3v01212004	+	14212963	14213046
CHR2v01212004	+	6879	7361		CHR2v01212004	+	6338	6421		CHR3v01212004	+	14213006	14213089
CHR2v01212004	+	6882	7049		CHR2v01212004	+	6341	6424		CHR3v01212004	+	14213011	14213094
CHR2v01212004	+	6885	6968		CHR2v01212004	+	6391	6474		CHR3v01212004	+	14213014	14213097
CHR2v01212004	+	6900	7382		CHR2v01212004	+	6392	6475		CHR3v01212004	+	14213016	14213099
CHR2v01212004	+	6923	7300		CHR2v01212004	+	6394	6477		CHR3v01212004	+	14213104	14213586
CHR2v01212004	+	6925	7071		CHR2v01212004	+	6437	6919		CHR3v01212004	+	14213111	14213572
CHR2v01212004	+	6983	7066		CHR2v01212004	+	6450	6827		CHR3v01212004	+	14213112	14213573
CHR2v01212004	+	6990	7073		CHR2v01212004	+	6458	6940		CHR3v01212004	+	14213427	14213720
CHR2v01212004	+	7000	7083		CHR2v01212004	+	6472	6954		CHR3v01212004	+	14213475	14213558
CHR2v01212004	+	7103	7207		CHR2v01212004	+	6473	6556		CHR3v01212004	+	14213502	14213900
CHR2v01212004	+	7108	7338		CHR2v01212004	+	6496	6978		CHR3v01212004	+	14213565	14213648
CHR2v01212004	+	7109	7486		CHR2v01212004	+	6499	6981		CHR3v01212004	+	14213643	14214062
CHR2v01212004	+	7129	7212		CHR2v01212004	+	6503	6649		CHR3v01212004	+	14213646	14213729
CHR2v01212004	+	7195	7299		CHR2v01212004	+	6504	6587		CHR3v01212004	+	14213668	14213751
CHR2v01212004	+	7196	7279		CHR2v01212004	+	6505	6987		CHR3v01212004	+	14213670	14213753
CHR2v01212004	+	7234	7317		CHR2v01212004	+	6512	6595		CHR3v01212004	+	14213727	14213810
CHR2v01212004	+	7327	7662		CHR2v01212004	+	6513	6596		CHR3v01212004	+	14213816	14214298
CHR2v01212004	+	7330	7665		CHR2v01212004	+	6514	6597		CHR3v01212004	+	14213857	14213940
CHR2v01212004	+	7336	7482		CHR2v01212004	+	6526	7008		CHR3v01212004	+	14213937	14214020
CHR2v01212004	+	7350	7664		CHR2v01212004	+	6530	6613		CHR3v01212004	+	14214178	14214261
CHR2v01212004	+	7356	7523		CHR2v01212004	+	6531	7013		CHR3v01212004	+	14214372	14214476
CHR2v01212004	+	7361	7444		CHR2v01212004	+	6532	6615		CHR3v01212004	-	1963750	1963833
CHR2v01212004	+	7369	7452		CHR2v01212004	+	6540	6875		CHR3v01212004	-	1963752	1963877
CHR2v01212004	+	7371	7454		CHR2v01212004	+	6547	7029		CHR3v01212004	-	1963761	1963844
CHR2v01212004	+	7372	7455		CHR2v01212004	+	6552	7034		CHR3v01212004	-	1963763	1963846
CHR2v01212004	+	7560	8042		CHR2v01212004	+	6568	6651		CHR3v01212004	+	1963791	1963874
CHR2v01212004	+	7576	7659		CHR2v01212004	+	6570	6758		CHR3v01212004	+	1963799	1963882
CHR2v01212004	+	7577	7660		CHR2v01212004	+	6573	7055		CHR3v01212004	-	1963900	1964004
CHR2v01212004	+	7737	7820		CHR2v01212004	+	6584	6961		CHR3v01212004	-	1963919	1964002
CHR2v01212004	+	7822	8136		CHR2v01212004	+	6594	7076		CHR3v01212004	+	1964070	1964174
CHR2v01212004	+	7838	7921		CHR2v01212004	+	6601	7083		CHR3v01212004	+	1964083	1964166
CHR2v01212004	+	7860	8342		CHR2v01212004	+	6602	7084		CHR3v01212004	+	1964086	1964169
CHR2v01212004	+	7885	7968		CHR2v01212004	+	6617	6700		CHR3v01212004	+	1964206	1964289
CHR2v01212004	+	7895	8083		CHR2v01212004	+	6618	7079		CHR3v01212004	+	1964298	1964381
CHR2v01212004	+	7900	8088		CHR2v01212004	+	6624	6707		CHR3v01212004	+	1964299	1964424
CHR2v01212004	+	7911	8057		CHR2v01212004	+	6626	6709		CHR3v01212004	+	1964321	1964404
CHR2v01212004	+	7919	8044		CHR2v01212004	+	6627	6710		CHR3v01212004	+	1964499	1964582
CHR2v01212004	+	7938	8084		CHR2v01212004	+	6673	7071		CHR3v01212004	+	1964762	1964845
CHR2v01212004	+	7944	8027		CHR2v01212004	+	6737	7072		CHR3v01212004	+	1964848	1964931
CHR2v01212004	+	7978	8082		CHR2v01212004	+	6771	6854		CHR3v01212004	-	1964849	1964932
CHR2v01212004	+	7997	8374		CHR2v01212004	+	6778	6861		CHR3v01212004	+	1965402	1965485
CHR2v01212004	+	8004	8087		CHR2v01212004	+	6779	6862		CHR3v01212004	-	1965672	1965755
CHR2v01212004	+	8010	8303		CHR2v01212004	+	6814	7212		CHR3v01212004	-	1965673	1965756
CHR2v01212004	+	8011	8094		CHR2v01212004	+	6815	6898		CHR3v01212004	-	1966310	1966603
CHR2v01212004	+	8012	8326		CHR2v01212004	+	6816	7067		CHR3v01212004	-	1966315	1966398
CHR2v01212004	+	8013	8327		CHR2v01212004	+	6836	7318		CHR3v01212004	-	1966316	1966399
CHR2v01212004	+	8014	8139		CHR2v01212004	+	6850	7248		CHR3v01212004	-	1966318	1966569
CHR2v01212004	+	8039	8521		CHR2v01212004	+	6879	6962		CHR3v01212004	-	1966322	1966405
CHR2v01212004	+	8049	8132		CHR2v01212004	+	6904	7386		CHR3v01212004	-	1966339	1966422
CHR2v01212004	+	8052	8135		CHR2v01212004	+	6905	6988		CHR3v01212004	-	1966352	1966435
CHR2v01212004	+	8055	8138		CHR2v01212004	+	6907	7389		CHR3v01212004	-	1966499	1966582
CHR2v01212004	+	8060	8143		CHR2v01212004	+	6909	6992		CHR3v01212004	+	1967635	1967718
CHR2v01212004	+	8061	8144		CHR2v01212004	+	6923	7321		CHR3v01212004	+	1967642	1967872
CHR2v01212004	+	8222	8662		CHR2v01212004	+	6924	7007		CHR3v01212004	+	1967749	1967874
CHR2v01212004	+	8223	8306		CHR2v01212004	+	6930	7412		CHR3v01212004	+	1968429	1968512
CHR2v01212004	+	8240	8617		CHR2v01212004	+	6947	7429		CHR3v01212004	+	1968518	1968601
CHR2v01212004	+	8261	8344		CHR2v01212004	+	6951	7433		CHR3v01212004	-	1968699	1968782
CHR2v01212004	+	8288	8371		CHR2v01212004	+	6968	7450		CHR3v01212004	-	1969041	1969124
CHR2v01212004	+	8405	8509		CHR2v01212004	+	6972	7454		CHR3v01212004	+	1969082	1969165
CHR2v01212004	+	8439	8522		CHR2v01212004	+	6986	7069		CHR3v01212004	+	1969250	1969333
CHR2v01212004	+	8441	8524		CHR2v01212004	+	7105	7524		CHR3v01212004	-	1969269	1969751
CHR2v01212004	+	8442	8525		CHR2v01212004	+	7108	7191		CHR3v01212004	-	1969294	1969398
CHR2v01212004	+	8478	8771		CHR2v01212004	+	7126	7209		CHR3v01212004	-	1969325	1969408
CHR2v01212004	+	8485	8694		CHR2v01212004	+	7235	7402		CHR3v01212004	+	1969350	1969433
CHR2v01212004	+	8488	8823		CHR2v01212004	+	7236	7382		CHR3v01212004	+	1969437	1969562
CHR2v01212004	+	8490	8573		CHR2v01212004	+	7240	7323		CHR3v01212004	-	1969801	1969884
CHR2v01212004	+	8499	8981		CHR2v01212004	+	7263	7388		CHR3v01212004	-	1970016	1970099
CHR2v01212004	+	8507	8611		CHR2v01212004	+	7272	7523		CHR3v01212004	+	1970180	1970263
CHR2v01212004	+	8508	8591		CHR2v01212004	+	7285	7662		CHR3v01212004	-	1970248	1970331
CHR2v01212004	+	8509	8592		CHR2v01212004	+	7315	7398		CHR3v01212004	-	1970284	1970367
CHR2v01212004	+	8513	8806		CHR2v01212004	+	7350	7832		CHR3v01212004	-	1970300	1970383
CHR2v01212004	+	8514	8954		CHR2v01212004	+	7358	7525		CHR3v01212004	+	1970305	1970388
CHR2v01212004	+	8519	8602		CHR2v01212004	+	7377	7859		CHR3v01212004	-	1970309	1970392
CHR2v01212004	+	8520	8603		CHR2v01212004	+	7398	7880		CHR4v01212004	+	3054734	3054817
CHR2v01212004	+	8577	8660		CHR2v01212004	+	7414	7665		CHR4v01212004	+	3054735	3054818
CHR2v01212004	+	8638	8721		CHR2v01212004	+	7419	7901		CHR4v01212004	+	3055232	3055315
CHR2v01212004	+	8681	8764		CHR2v01212004	+	7420	7503		CHR4v01212004	+	3055233	3055316
CHR2v01212004	+	8685	8768		CHR2v01212004	+	7435	7518		CHR4v01212004	+	3057160	3057243
CHR2v01212004	+	8689	8772		CHR2v01212004	+	7562	8044		CHR4v01212004	+	3057193	3057276
CHR2v01212004	+	8712	8795		CHR2v01212004	+	7565	7648		CHR4v01212004	+	3057194	3057277
CHR2v01212004	+	8719	8802		CHR2v01212004	+	7742	7825		CHR4v01212004	+	3057658	3057741
CHR2v01212004	+	8725	9060		CHR2v01212004	+	7748	8083		CHR4v01212004	+	3057691	3057774
CHR2v01212004	+	8746	8829		CHR2v01212004	+	7749	8210		CHR4v01212004	+	3057692	3057775
CHR2v01212004	+	8852	8935		CHR2v01212004	+	7776	8132		CHR4v01212004	+	3058654	3058737
CHR2v01212004	+	8855	8938		CHR2v01212004	+	7790	7873		CHR4v01212004	+	3058687	3058770
CHR2v01212004	+	8858	9319		CHR2v01212004	+	7791	7874		CHR4v01212004	+	3058688	3058771
CHR2v01212004	+	8862	8945		CHR2v01212004	+	7818	8300		CHR4v01212004	+	3059152	3059235
CHR2v01212004	+	8880	9362		CHR2v01212004	+	7842	8324		CHR4v01212004	+	3059185	3059268
CHR2v01212004	+	8898	9359		CHR2v01212004	+	7843	8325		CHR4v01212004	+	3059186	3059269
CHR2v01212004	+	8943	9026		CHR2v01212004	+	7863	7946		CHR4v01212004	+	3059650	3059733
CHR2v01212004	+	8979	9314		CHR2v01212004	+	7864	7947		CHR4v01212004	+	3059683	3059766
CHR2v01212004	+	8981	9358		CHR2v01212004	+	7886	7969		CHR4v01212004	+	3059684	3059767
CHR2v01212004	+	9000	9083		CHR2v01212004	+	7892	7975		CHR4v01212004	+	3060148	3060231
CHR2v01212004	+	9003	9086		CHR2v01212004	+	7893	7976		CHR4v01212004	+	3060181	3060264
CHR2v01212004	+	9005	9088		CHR2v01212004	+	7895	8377		CHR4v01212004	+	3060182	3060265
CHR2v01212004	+	9023	9106		CHR2v01212004	+	7900	7983		CHR4v01212004	+	3060646	3060729
CHR2v01212004	+	9110	9193		CHR2v01212004	+	7917	8000		CHR4v01212004	+	3060679	3060762
CHR2v01212004	+	9114	9197		CHR2v01212004	+	7919	8086		CHR4v01212004	+	3060680	3060763
CHR2v01212004	-	9121	9204		CHR2v01212004	+	7920	8129		CHR5v01212004	+	11185838	11185921
CHR2v01212004	+	9128	9211		CHR2v01212004	-	7938	8021		CHR5v01212004	+	11185839	11185922
CHR2v01212004	+	9161	9307		CHR2v01212004	+	7968	8366		CHR5v01212004	+	11186340	11186423
CHR2v01212004	+	9162	9245		CHR2v01212004	+	7978	8376		CHR5v01212004	+	11186341	11186424
CHR2v01212004	+	9189	9272		CHR2v01212004	+	7986	8468
CHR2v01212004	+	9206	9289		CHR2v01212004	+	7988	8323
CHR2v01212004	+	9215	9298		CHR2v01212004	+	7993	8139
CHR2v01212004	+	9216	9299		CHR2v01212004	+	7998	8144
CHR2v01212004	+	9219	9365		CHR2v01212004	+	8005	8088
CHR2v01212004	+	9220	9366		CHR2v01212004	+	8007	8489
CHR2v01212004	+	9221	9304		CHR2v01212004	+	8011	8346
CHR2v01212004	+	9233	9316		CHR2v01212004	+	8012	8347
CHR2v01212004	+	9235	9339		CHR2v01212004	+	8013	8138
CHR2v01212004	+	9239	9364		CHR2v01212004	+	8018	8143
CHR2v01212004	+	9255	9338		CHR2v01212004	+	8028	8510
CHR2v01212004	+	9265	9348		CHR2v01212004	+	8031	8114
CHR2v01212004	+	9389	9514		CHR2v01212004	+	8038	8520
CHR2v01212004	+	9414	9518		CHR2v01212004	+	8040	8522
CHR2v01212004	+	9416	9520		CHR2v01212004	+	8051	8134
CHR3v01212004	-	13636699	13636908		CHR2v01212004	+	8053	8136
CHR3v01212004	-	13636702	13636911		CHR2v01212004	+	8062	8145
CHR3v01212004	+	13636704	13636892		CHR2v01212004	+	8220	8660
CHR3v01212004	-	13636705	13636893		CHR2v01212004	+	8221	8640
CHR3v01212004	-	13636706	13636894		CHR2v01212004	+	8243	8662
CHR3v01212004	-	13636709	13636897		CHR2v01212004	+	8383	8781
CHR3v01212004	+	13636711	13636899		CHR2v01212004	+	8405	8761
CHR3v01212004	-	13636712	13636900		CHR2v01212004	+	8437	8772
CHR3v01212004	-	13636713	13636985		CHR2v01212004	+	8443	8526
CHR3v01212004	-	13636716	13636904		CHR2v01212004	+	8445	8801
CHR3v01212004	+	13636718	13636906		CHR2v01212004	+	8458	8541
CHR3v01212004	-	13636719	13636907		CHR2v01212004	+	8471	8764
CHR3v01212004	+	13847652	13847735		CHR2v01212004	+	8486	8611
CHR3v01212004	+	13847661	13847744		CHR2v01212004	+	8494	8766
CHR3v01212004	+	13849666	13849770		CHR2v01212004	+	8499	8771
CHR3v01212004	+	13860601	13860684		CHR2v01212004	+	8519	8833
CHR3v01212004	+	13860610	13860693		CHR2v01212004	+	8529	8612
CHR3v01212004	+	13863092	13863196		CHR2v01212004	+	8534	8617
CHR3v01212004	+	13872166	13872270		CHR2v01212004	+	8541	8624
CHR3v01212004	+	13877774	13877857		CHR2v01212004	+	8547	8945
CHR3v01212004	+	13877783	13877866		CHR2v01212004	+	8561	8644
CHR3v01212004	+	14203866	14203949		CHR2v01212004	+	8568	9050
CHR3v01212004	+	14203871	14203954		CHR2v01212004	+	8610	8693
CHR3v01212004	+	14203874	14204062		CHR2v01212004	+	8638	9057
CHR3v01212004	+	14203962	14204066		CHR2v01212004	+	8639	8722
CHR3v01212004	+	14203964	14204068		CHR2v01212004	+	8662	9102
CHR3v01212004	+	14208176	14208259		CHR2v01212004	+	8684	8767
CHR3v01212004	+	14208673	14208798		CHR2v01212004	+	8706	9083
CHR3v01212004	+	14208675	14208758		CHR2v01212004	+	8708	8791
CHR3v01212004	+	14208687	14209127		CHR2v01212004	+	8712	8963
CHR3v01212004	+	14208688	14209107		CHR2v01212004	+	8714	9028
CHR3v01212004	+	14208694	14209176		CHR2v01212004	+	8715	8798
CHR3v01212004	+	14208697	14209179		CHR2v01212004	+	8729	9211
CHR3v01212004	+	14208702	14208890		CHR2v01212004	+	8748	8831
CHR3v01212004	+	14208704	14209186		CHR2v01212004	+	8754	8837
CHR3v01212004	+	14208705	14208788		CHR2v01212004	+	8756	8839
CHR3v01212004	+	14208706	14209062		CHR2v01212004	+	8857	9339
CHR3v01212004	+	14208708	14208791		CHR2v01212004	+	8875	8958
CHR3v01212004	+	14208710	14209108		CHR2v01212004	+	8878	9360
CHR3v01212004	+	14208713	14208796		CHR2v01212004	+	8940	9233
CHR3v01212004	+	14208718	14208801		CHR2v01212004	+	8977	9060
CHR3v01212004	+	14208723	14209205		CHR2v01212004	+	8979	9062
CHR3v01212004	+	14208727	14208810		CHR2v01212004	+	9024	9107
CHR3v01212004	+	14208744	14209226		CHR2v01212004	+	9032	9304
CHR3v01212004	+	14208765	14209247		CHR2v01212004	+	9047	9130
CHR3v01212004	+	14208775	14209257		CHR2v01212004	+	9116	9199
CHR3v01212004	+	14208784	14209182		CHR2v01212004	+	9119	9475
CHR3v01212004	+	14208787	14209101		CHR2v01212004	+	9128	9316
CHR3v01212004	+	14208793	14208876		CHR2v01212004	+	9129	9212
CHR3v01212004	+	14208796	14209278		CHR2v01212004	+	9156	9365
CHR3v01212004	+	14208805	14209287		CHR2v01212004	+	9162	9476
CHR3v01212004	+	14208808	14208891		CHR2v01212004	+	9183	9266
CHR3v01212004	+	14208816	14209298		CHR2v01212004	+	9214	9297
CHR3v01212004	+	14208817	14209299		CHR2v01212004	+	9215	9319
CHR3v01212004	+	14208826	14209308		CHR2v01212004	+	9216	9362
CHR3v01212004	+	14208831	14209166		CHR2v01212004	+	9217	9510
CHR3v01212004	+	14208832	14208915		CHR2v01212004	+	9218	9490
CHR3v01212004	+	14208837	14209319		CHR2v01212004	+	9224	9307
CHR3v01212004	+	14208838	14209320		CHR2v01212004	-	9225	9308
CHR3v01212004	+	14208847	14209329		CHR2v01212004	+	9262	9366
CHR3v01212004	+	14208852	14208935		CHR2v01212004	+	9280	9363
CHR3v01212004	+	14208858	14209340		CHR2v01212004	+	9281	9364
CHR3v01212004	+	14208868	14209350		CHR2v01212004	+	9386	9469
CHR3v01212004	+	14208875	14209357		CHR2v01212004	+	9391	9474
CHR3v01212004	+	14208878	14208961		CHR2v01212004	+	9395	9520
CHR3v01212004	+	14208879	14208962		CHR2v01212004	+	9411	9494
CHR3v01212004	+	14208880	14209362		CHR2v01212004	+	9418	9501
CHR3v01212004	+	14208896	14209378		CHR3v01212004	-	13636700	13636909
CHR3v01212004	+	14208898	14209317		CHR3v01212004	-	13636707	13636895
CHR3v01212004	+	14208901	14209383		CHR3v01212004	-	13636714	13636902
CHR3v01212004	+	14208902	14209321		CHR3v01212004	-	13700912	13700995
CHR3v01212004	+	14208944	14209027		CHR3v01212004	-	13701439	13701522
CHR3v01212004	+	14208960	14209043		CHR3v01212004	-	13702436	13702540
CHR3v01212004	+	14209050	14209532		CHR3v01212004	-	13706866	13706970
CHR3v01212004	+	14209068	14209151		CHR3v01212004	-	13709691	13709774
CHR3v01212004	+	14209070	14209153		CHR3v01212004	-	13712722	13712805
CHR3v01212004	+	14209071	14209553		CHR3v01212004	-	13713226	13713309
CHR3v01212004	+	14209073	14209240		CHR3v01212004	-	13716732	13716836
CHR3v01212004	+	14209074	14209157		CHR3v01212004	-	13795861	13795944
CHR3v01212004	+	14209075	14209473		CHR3v01212004	-	13796388	13796471
CHR3v01212004	+	14209076	14209369		CHR3v01212004	+	13847642	13847725
CHR3v01212004	+	14209077	14209244		CHR3v01212004	+	13847649	13847732
CHR3v01212004	+	14209078	14209476		CHR3v01212004	+	13860591	13860674
CHR3v01212004	+	14209082	14209480		CHR3v01212004	+	13860598	13860681
CHR3v01212004	+	14209093	14209575		CHR3v01212004	+	13877764	13877847
CHR3v01212004	+	14209114	14209596		CHR3v01212004	+	13877771	13877854
CHR3v01212004	+	14209122	14209478		CHR3v01212004	+	14203867	14203950
CHR3v01212004	+	14209156	14209239		CHR3v01212004	+	14203870	14203953
CHR3v01212004	+	14209163	14209603		CHR3v01212004	+	14203871	14204038
CHR3v01212004	+	14209213	14209674		CHR3v01212004	+	14203873	14203998
CHR3v01212004	+	14209215	14209550		CHR3v01212004	+	14203874	14203999
CHR3v01212004	+	14209217	14209552		CHR3v01212004	+	14203939	14204022
CHR3v01212004	+	14209258	14209740		CHR3v01212004	+	14203940	14204023
CHR3v01212004	+	14209264	14209662		CHR3v01212004	+	14203941	14204024
CHR3v01212004	+	14209269	14209688		CHR3v01212004	+	14203943	14204068
CHR3v01212004	+	14209277	14209675		CHR3v01212004	+	14203959	14204042
CHR3v01212004	+	14209288	14209371		CHR3v01212004	+	14203966	14204049
CHR3v01212004	+	14209345	14209428		CHR3v01212004	+	14203975	14204058
CHR3v01212004	+	14209361	14209444		CHR3v01212004	+	14204845	14204928
CHR3v01212004	+	14209385	14209468		CHR3v01212004	+	14204999	14205082
CHR3v01212004	+	14209386	14209595		CHR3v01212004	+	14208170	14208253
CHR3v01212004	+	14209398	14209481		CHR3v01212004	+	14208359	14208442
CHR3v01212004	+	14209402	14209821		CHR3v01212004	+	14208674	14208757
CHR3v01212004	+	14209448	14209930		CHR3v01212004	+	14208678	14208761
CHR3v01212004	+	14209466	14209549		CHR3v01212004	+	14208681	14208890
CHR3v01212004	+	14209470	14209952		CHR3v01212004	+	14208683	14208766
CHR3v01212004	+	14209486	14209569		CHR3v01212004	+	14208700	14209182
CHR3v01212004	+	14209491	14209973		CHR3v01212004	+	14208706	14209104
CHR3v01212004	+	14209493	14209849		CHR3v01212004	+	14208708	14209127
CHR3v01212004	+	14209499	14209582		CHR3v01212004	+	14208709	14209107
CHR3v01212004	+	14209584	14210066		CHR3v01212004	+	14208711	14208794
CHR3v01212004	+	14209586	14210068		CHR3v01212004	+	14208721	14209203
CHR3v01212004	+	14209587	14210069		CHR3v01212004	+	14208727	14209209
CHR3v01212004	+	14209588	14210070		CHR3v01212004	+	14208742	14209224
CHR3v01212004	+	14209590	14209673		CHR3v01212004	+	14208748	14208831
CHR3v01212004	+	14209607	14209690		CHR3v01212004	+	14208749	14208832
CHR3v01212004	+	14209608	14210090		CHR3v01212004	+	14208763	14209245
CHR3v01212004	+	14209623	14210042		CHR3v01212004	+	14208773	14209255
CHR3v01212004	+	14209648	14210130		CHR3v01212004	+	14208782	14209243
CHR3v01212004	+	14209665	14209748		CHR3v01212004	+	14208783	14209244
CHR3v01212004	+	14209669	14210151		CHR3v01212004	+	14208784	14209266
CHR3v01212004	+	14209684	14209977		CHR3v01212004	+	14208788	14209186
CHR3v01212004	+	14209690	14210172		CHR3v01212004	+	14208792	14208875
CHR3v01212004	+	14209694	14210155		CHR3v01212004	+	14208803	14208886
CHR3v01212004	+	14209710	14210192		CHR3v01212004	+	14208804	14208887
CHR3v01212004	+	14209711	14210193		CHR3v01212004	+	14208814	14209296
CHR3v01212004	+	14209712	14210152		CHR3v01212004	+	14208815	14208898
CHR3v01212004	+	14209731	14210213		CHR3v01212004	+	14208816	14209151
CHR3v01212004	+	14209732	14210214		CHR3v01212004	+	14208820	14209176
CHR3v01212004	+	14209733	14209816		CHR3v01212004	+	14208831	14209313
CHR3v01212004	+	14209734	14209817		CHR3v01212004	+	14208835	14209317
CHR3v01212004	+	14209736	14209819		CHR3v01212004	+	14208841	14208924
CHR3v01212004	+	14209752	14210234		CHR3v01212004	+	14208844	14208927
CHR3v01212004	+	14209753	14210235		CHR3v01212004	+	14208853	14209251
CHR3v01212004	+	14209767	14209850		CHR3v01212004	+	14208854	14208937
CHR3v01212004	+	14209769	14210104		CHR3v01212004	+	14208863	14209345
CHR3v01212004	+	14209771	14209854		CHR3v01212004	+	14208875	14208958
CHR3v01212004	+	14209773	14209856		CHR3v01212004	+	14208879	14209361
CHR3v01212004	+	14209774	14210256		CHR3v01212004	+	14208880	14208963
CHR3v01212004	+	14209838	14210257		CHR3v01212004	+	14208884	14209366
CHR3v01212004	+	14209839	14209922		CHR3v01212004	+	14208900	14208983
CHR3v01212004	+	14209847	14209972		CHR3v01212004	+	14208905	14208988
CHR3v01212004	+	14209869	14210288		CHR3v01212004	+	14208936	14209418
CHR3v01212004	+	14209872	14209976		CHR3v01212004	+	14208957	14209439
CHR3v01212004	+	14209878	14209961		CHR3v01212004	+	14208978	14209460
CHR3v01212004	+	14209880	14209963		CHR3v01212004	+	14208980	14209420
CHR3v01212004	+	14209881	14209964		CHR3v01212004	+	14208981	14209064
CHR3v01212004	+	14209897	14209980		CHR3v01212004	+	14208985	14209383
CHR3v01212004	+	14209900	14209983		CHR3v01212004	+	14208999	14209481
CHR3v01212004	+	14209916	14209999		CHR3v01212004	+	14209006	14209488
CHR3v01212004	+	14209924	14210007		CHR3v01212004	+	14209010	14209492
CHR3v01212004	+	14209940	14210023		CHR3v01212004	+	14209011	14209094
CHR3v01212004	+	14209986	14210468		CHR3v01212004	+	14209020	14209502
CHR3v01212004	+	14210031	14210114		CHR3v01212004	+	14209027	14209509
CHR3v01212004	+	14210044	14210127		CHR3v01212004	+	14209031	14209513
CHR3v01212004	+	14210074	14210157		CHR3v01212004	+	14209041	14209124
CHR3v01212004	+	14210129	14210212		CHR3v01212004	+	14209050	14209511
CHR3v01212004	+	14210201	14210473		CHR3v01212004	+	14209052	14209534
CHR3v01212004	+	14210203	14210307		CHR3v01212004	+	14209054	14209473
CHR3v01212004	+	14210222	14210305		CHR3v01212004	+	14209072	14209554
CHR3v01212004	+	14210249	14210437		CHR3v01212004	+	14209073	14209555
CHR3v01212004	+	14210280	14210363		CHR3v01212004	+	14209076	14209390
CHR3v01212004	+	14210305	14210472		CHR3v01212004	+	14209077	14209370
CHR3v01212004	+	14210327	14210410		CHR3v01212004	+	14209079	14209162
CHR3v01212004	+	14210351	14210833		CHR3v01212004	+	14209082	14209459
CHR3v01212004	+	14210372	14210455		CHR3v01212004	+	14209099	14209371
CHR3v01212004	+	14210386	14210469		CHR3v01212004	+	14209102	14209185
CHR3v01212004	+	14210388	14210471		CHR3v01212004	+	14209130	14209612
CHR3v01212004	+	14210738	14211220		CHR3v01212004	+	14209157	14209240
CHR3v01212004	+	14210741	14210845		CHR3v01212004	+	14209184	14209603
CHR3v01212004	+	14210742	14210909		CHR3v01212004	+	14209209	14209607
CHR3v01212004	+	14210743	14210910		CHR3v01212004	+	14209213	14209548
CHR3v01212004	+	14210753	14211004		CHR3v01212004	+	14209264	14209746
CHR3v01212004	+	14210759	14211241		CHR3v01212004	+	14209265	14209348
CHR3v01212004	+	14210763	14211245		CHR3v01212004	+	14209266	14209349
CHR3v01212004	+	14210780	14211262		CHR3v01212004	+	14209269	14209604
CHR3v01212004	+	14210784	14211266		CHR3v01212004	+	14209295	14209777
CHR3v01212004	+	14210807	14211268		CHR3v01212004	+	14209304	14209387
CHR3v01212004	+	14210815	14210919		CHR3v01212004	+	14209335	14209817
CHR3v01212004	+	14210822	14210905		CHR3v01212004	+	14209340	14209423
CHR3v01212004	+	14210828	14210911		CHR3v01212004	+	14209347	14209472
CHR3v01212004	+	14210879	14210962		CHR3v01212004	+	14209361	14209843
CHR3v01212004	+	14211097	14211432		CHR3v01212004	+	14209364	14209552
CHR3v01212004	+	14211138	14211557		CHR3v01212004	+	14209368	14209850
CHR3v01212004	+	14211160	14211243		CHR3v01212004	+	14209383	14209592
CHR3v01212004	+	14211167	14211607		CHR3v01212004	+	14209402	14209842
CHR3v01212004	+	14211176	14211553		CHR3v01212004	+	14209409	14209891
CHR3v01212004	+	14211186	14211269		CHR3v01212004	+	14209430	14209912
CHR3v01212004	+	14211188	14211271		CHR3v01212004	+	14209442	14209924
CHR3v01212004	+	14211195	14211278		CHR3v01212004	+	14209451	14209933
CHR3v01212004	+	14211196	14211678		CHR3v01212004	+	14209463	14209546
CHR3v01212004	+	14211198	14211554		CHR3v01212004	+	14209464	14209946
CHR3v01212004	+	14211217	14211699		CHR3v01212004	+	14209466	14209948
CHR3v01212004	+	14211220	14211702		CHR3v01212004	+	14209472	14209954
CHR3v01212004	+	14211238	14211720		CHR3v01212004	+	14209485	14209568
CHR3v01212004	+	14211239	14211721		CHR3v01212004	+	14209487	14209969
CHR3v01212004	+	14211241	14211723		CHR3v01212004	+	14209493	14209975
CHR3v01212004	+	14211259	14211741		CHR3v01212004	+	14209500	14209982
CHR3v01212004	+	14211262	14211744		CHR3v01212004	+	14209513	14209596
CHR3v01212004	+	14211283	14211765		CHR3v01212004	+	14209568	14209966
CHR3v01212004	+	14211285	14211368		CHR3v01212004	+	14209579	14209914
CHR3v01212004	+	14211302	14211385		CHR3v01212004	+	14209585	14210067
CHR3v01212004	+	14211306	14211389		CHR3v01212004	+	14209589	14209672
CHR3v01212004	+	14211402	14211506		CHR3v01212004	+	14209606	14209689
CHR3v01212004	+	14211407	14211490		CHR3v01212004	+	14209628	14210110
CHR3v01212004	+	14211429	14211512		CHR3v01212004	+	14209630	14210070
CHR3v01212004	+	14211449	14211931		CHR3v01212004	+	14209649	14210131
CHR3v01212004	+	14211451	14211534		CHR3v01212004	+	14209670	14210152
CHR3v01212004	+	14211453	14211536		CHR3v01212004	+	14209695	14210156
CHR3v01212004	+	14211455	14211622		CHR3v01212004	+	14209711	14210109
CHR3v01212004	+	14211458	14211541		CHR3v01212004	+	14209738	14210157
CHR3v01212004	+	14211460	14211669		CHR3v01212004	+	14209764	14209847
CHR3v01212004	+	14211461	14211943		CHR3v01212004	+	14209766	14209849
CHR3v01212004	+	14211482	14211964		CHR3v01212004	+	14209769	14209978
CHR3v01212004	+	14211503	14211985		CHR3v01212004	+	14209772	14209855
CHR3v01212004	+	14211523	14212005		CHR3v01212004	+	14209799	14210155
CHR3v01212004	+	14211544	14212026		CHR3v01212004	+	14209817	14209900
CHR3v01212004	+	14211556	14212038		CHR3v01212004	+	14209842	14209925
CHR3v01212004	+	14211559	14211936		CHR3v01212004	+	14209853	14210335
CHR3v01212004	+	14211565	14212047		CHR3v01212004	+	14209857	14210234
CHR3v01212004	+	14211571	14211654		CHR3v01212004	+	14209865	14210347
CHR3v01212004	+	14211573	14211677		CHR3v01212004	+	14209868	14210350
CHR3v01212004	+	14211574	14211930		CHR3v01212004	+	14209869	14209973
CHR3v01212004	+	14211578	14212060		CHR3v01212004	+	14209871	14210353
CHR3v01212004	+	14211582	14211854		CHR3v01212004	+	14209874	14210356
CHR3v01212004	+	14211598	14212080		CHR3v01212004	+	14209875	14210357
CHR3v01212004	+	14211599	14211682		CHR3v01212004	+	14209877	14210359
CHR3v01212004	+	14211617	14212099		CHR3v01212004	+	14209878	14210360
CHR3v01212004	+	14211619	14212101		CHR3v01212004	+	14209884	14209967
CHR3v01212004	+	14211625	14211708		CHR3v01212004	+	14209889	14209972
CHR3v01212004	+	14211630	14211713		CHR3v01212004	+	14209918	14210001
CHR3v01212004	+	14211640	14212122		CHR3v01212004	+	14209919	14210002
CHR3v01212004	+	14211661	14212143		CHR3v01212004	+	14209959	14210042
CHR3v01212004	+	14211664	14211747		CHR3v01212004	+	14209985	14210467
CHR3v01212004	+	14211679	14211762		CHR3v01212004	+	14209986	14210069
CHR3v01212004	+	14211773	14211961		CHR3v01212004	+	14209989	14210072
CHR3v01212004	+	14211793	14212170		CHR3v01212004	+	14210023	14210106
CHR3v01212004	+	14211811	14212293		CHR3v01212004	+	14210024	14210107
CHR3v01212004	+	14211835	14211918		CHR3v01212004	+	14210066	14210149
CHR3v01212004	+	14211836	14212318		CHR3v01212004	+	14210127	14210210
CHR3v01212004	+	14211839	14212006		CHR3v01212004	+	14210148	14210231
CHR3v01212004	+	14211842	14211925		CHR3v01212004	+	14210180	14210473
CHR3v01212004	+	14211857	14212339		CHR3v01212004	+	14210197	14210469
CHR3v01212004	+	14211880	14212257		CHR3v01212004	+	14210203	14210391
CHR3v01212004	+	14211882	14212070		CHR3v01212004	+	14210204	14210392
CHR3v01212004	+	14211940	14212023		CHR3v01212004	-	14210251	14210334
CHR3v01212004	+	14211947	14212072		CHR3v01212004	+	14210253	14210336
CHR3v01212004	+	14211948	14212409		CHR3v01212004	-	14210259	14210342
CHR3v01212004	+	14211955	14212164		CHR3v01212004	-	14210262	14210408
CHR3v01212004	+	14211956	14212438		CHR3v01212004	-	14210268	14210351
CHR3v01212004	+	14211957	14212439		CHR3v01212004	+	14210269	14210394
CHR3v01212004	+	14211974	14212120		CHR3v01212004	+	14210281	14210364
CHR3v01212004	+	14211977	14212459		CHR3v01212004	+	14210282	14210365
CHR3v01212004	+	14211984	14212067		CHR3v01212004	+	14210305	14210451
CHR3v01212004	+	14211992	14212411		CHR3v01212004	+	14210307	14210390
CHR3v01212004	+	14211993	14212076		CHR3v01212004	+	14210310	14210393
CHR3v01212004	+	14211998	14212081		CHR3v01212004	+	14210313	14210396
CHR3v01212004	+	14211999	14212082		CHR3v01212004	+	14210314	14210397
CHR3v01212004	+	14212011	14212094		CHR3v01212004	+	14210347	14210829
CHR3v01212004	+	14212018	14212500		CHR3v01212004	+	14210412	14210495
CHR3v01212004	+	14212034	14212117		CHR3v01212004	+	14210738	14210821
CHR3v01212004	+	14212045	14212443		CHR3v01212004	+	14210739	14211221
CHR3v01212004	+	14212065	14212295		CHR3v01212004	+	14210741	14210824
CHR3v01212004	+	14212086	14212169		CHR3v01212004	+	14210743	14211225
CHR3v01212004	+	14212152	14212550		CHR3v01212004	+	14210744	14211226
CHR3v01212004	+	14212153	14212236		CHR3v01212004	+	14210746	14210913
CHR3v01212004	+	14212173	14212256		CHR3v01212004	+	14210747	14210872
CHR3v01212004	+	14212191	14212274		CHR3v01212004	+	14210751	14210855
CHR3v01212004	+	14212232	14212483		CHR3v01212004	+	14210752	14210919
CHR3v01212004	+	14212284	14212640		CHR3v01212004	+	14210753	14210962
CHR3v01212004	+	14212287	14212706		CHR3v01212004	+	14210760	14210843
CHR3v01212004	+	14212293	14212376		CHR3v01212004	+	14210765	14210848
CHR3v01212004	+	14212307	14212684		CHR3v01212004	+	14210805	14210888
CHR3v01212004	+	14212313	14212480		CHR3v01212004	+	14210809	14211291
CHR3v01212004	+	14212318	14212401		CHR3v01212004	+	14210827	14210910
CHR3v01212004	+	14212329	14212412		CHR3v01212004	+	14211120	14211602
CHR3v01212004	+	14212379	14212777		CHR3v01212004	+	14211121	14211519
CHR3v01212004	+	14212425	14212508		CHR3v01212004	+	14211122	14211541
CHR3v01212004	+	14212472	14212576		CHR3v01212004	+	14211137	14211367
CHR3v01212004	+	14212513	14212638		CHR3v01212004	+	14211138	14211620
CHR3v01212004	+	14212515	14212598		CHR3v01212004	+	14211139	14211537
CHR3v01212004	+	14212517	14212999		CHR3v01212004	+	14211141	14211623
CHR3v01212004	+	14212533	14212616		CHR3v01212004	+	14211142	14211624
CHR3v01212004	+	14212538	14213020		CHR3v01212004	+	14211160	14211642
CHR3v01212004	+	14212540	14213001		CHR3v01212004	+	14211162	14211644
CHR3v01212004	+	14212541	14212687		CHR3v01212004	+	14211163	14211645
CHR3v01212004	+	14212558	14212641		CHR3v01212004	+	14211176	14211658
CHR3v01212004	+	14212559	14213041		CHR3v01212004	+	14211177	14211659
CHR3v01212004	+	14212561	14212644		CHR3v01212004	+	14211179	14211661
CHR3v01212004	+	14212779	14213093		CHR3v01212004	+	14211181	14211264
CHR3v01212004	+	14212795	14212878		CHR3v01212004	+	14211182	14211265
CHR3v01212004	+	14212817	14213299		CHR3v01212004	+	14211183	14211266
CHR3v01212004	+	14212842	14212925		CHR3v01212004	+	14211185	14211268
CHR3v01212004	+	14212852	14213229		CHR3v01212004	+	14211190	14211273
CHR3v01212004	+	14212854	14213252		CHR3v01212004	+	14211194	14211277
CHR3v01212004	+	14212857	14213255		CHR3v01212004	+	14211195	14211677
CHR3v01212004	+	14212868	14213203		CHR3v01212004	+	14211197	14211679
CHR3v01212004	+	14212876	14212959		CHR3v01212004	+	14211198	14211680
CHR3v01212004	+	14212895	14213356		CHR3v01212004	+	14211200	14211682
CHR3v01212004	+	14212901	14212984		CHR3v01212004	+	14211216	14211698
CHR3v01212004	+	14212931	14213014		CHR3v01212004	+	14211228	14211311
CHR3v01212004	+	14212935	14213228		CHR3v01212004	+	14211237	14211719
CHR3v01212004	+	14212953	14213204		CHR3v01212004	+	14211239	14211322
CHR3v01212004	+	14212954	14213331		CHR3v01212004	+	14211259	14211720
CHR3v01212004	+	14212956	14213039		CHR3v01212004	+	14211279	14211362
CHR3v01212004	+	14212957	14213040		CHR3v01212004	+	14211285	14211704
CHR3v01212004	+	14212967	14213260		CHR3v01212004	+	14211286	14211705
CHR3v01212004	+	14212968	14213408		CHR3v01212004	+	14211295	14211378
CHR3v01212004	+	14212969	14213283		CHR3v01212004	+	14211298	14211381
CHR3v01212004	+	14212970	14213284		CHR3v01212004	+	14211348	14211431
CHR3v01212004	+	14212971	14213096		CHR3v01212004	+	14211349	14211432
CHR3v01212004	+	14212996	14213478		CHR3v01212004	+	14211351	14211434
CHR3v01212004	+	14213009	14213092		CHR3v01212004	+	14211394	14211876
CHR3v01212004	+	14213012	14213095		CHR3v01212004	+	14211407	14211784
CHR3v01212004	+	14213017	14213100		CHR3v01212004	+	14211415	14211897
CHR3v01212004	+	14213018	14213101		CHR3v01212004	+	14211429	14211911
CHR3v01212004	+	14213061	14213144		CHR3v01212004	+	14211430	14211513
CHR3v01212004	+	14213062	14213481		CHR3v01212004	+	14211453	14211935
CHR3v01212004	+	14213063	14213482		CHR3v01212004	+	14211456	14211938
CHR3v01212004	+	14213064	14213147		CHR3v01212004	+	14211460	14211606
CHR3v01212004	+	14213103	14213585		CHR3v01212004	+	14211461	14211544
CHR3v01212004	+	14213109	14213549		CHR3v01212004	+	14211462	14211944
CHR3v01212004	+	14213122	14213205		CHR3v01212004	+	14211469	14211552
CHR3v01212004	+	14213123	14213584		CHR3v01212004	+	14211470	14211553
CHR3v01212004	+	14213124	14213606		CHR3v01212004	+	14211471	14211554
CHR3v01212004	+	14213143	14213226		CHR3v01212004	+	14211483	14211965
CHR3v01212004	+	14213144	14213227		CHR3v01212004	+	14211487	14211570
CHR3v01212004	+	14213147	14213230		CHR3v01212004	+	14211488	14211970
CHR3v01212004	+	14213171	14213254		CHR3v01212004	+	14211489	14211572
CHR3v01212004	+	14213179	14213619		CHR3v01212004	+	14211497	14211832
CHR3v01212004	+	14213180	14213263		CHR3v01212004	+	14211504	14211986
CHR3v01212004	+	14213197	14213574		CHR3v01212004	+	14211509	14211991
CHR3v01212004	+	14213218	14213301		CHR3v01212004	+	14211525	14211608
CHR3v01212004	+	14213245	14213328		CHR3v01212004	+	14211527	14211715
CHR3v01212004	+	14213283	14213765		CHR3v01212004	+	14211530	14212012
CHR3v01212004	+	14213304	14213786		CHR3v01212004	+	14211541	14211918
CHR3v01212004	+	14213362	14213466		CHR3v01212004	+	14211551	14212033
CHR3v01212004	+	14213396	14213479		CHR3v01212004	+	14211558	14212040
CHR3v01212004	+	14213435	14213728		CHR3v01212004	+	14211559	14212041
CHR3v01212004	+	14213442	14213651		CHR3v01212004	+	14211573	14212055
CHR3v01212004	+	14213445	14213780		CHR3v01212004	+	14211574	14212056
CHR3v01212004	+	14213447	14213530		CHR3v01212004	+	14211575	14212057
CHR3v01212004	+	14213456	14213938		CHR3v01212004	+	14211578	14212039
CHR3v01212004	+	14213464	14213568		CHR3v01212004	+	14211579	14212061
CHR3v01212004	+	14213465	14213548		CHR3v01212004	+	14211580	14212062
CHR3v01212004	+	14213470	14213763		CHR3v01212004	+	14211581	14211664
CHR3v01212004	+	14213471	14213911		CHR3v01212004	+	14211583	14211666
CHR3v01212004	+	14213476	14213559		CHR3v01212004	+	14211584	14211667
CHR3v01212004	+	14213477	14213560		CHR3v01212004	+	14211590	14212072
CHR3v01212004	+	14213534	14213617		CHR3v01212004	+	14211594	14212076
CHR3v01212004	+	14213595	14213678		CHR3v01212004	+	14211595	14212077
CHR3v01212004	+	14213638	14213721		CHR3v01212004	+	14211596	14212078
CHR3v01212004	+	14213642	14213725		CHR3v01212004	+	14211600	14212082
CHR3v01212004	+	14213669	14213752		CHR3v01212004	+	14211601	14212083
CHR3v01212004	+	14213676	14213759		CHR3v01212004	+	14211615	14212097
CHR3v01212004	+	14213682	14214017		CHR3v01212004	+	14211630	14212070
CHR3v01212004	+	14213724	14213807		CHR3v01212004	+	14211694	14212071
CHR3v01212004	+	14213746	14214060		CHR3v01212004	+	14211728	14212084
CHR3v01212004	+	14213749	14214168		CHR3v01212004	+	14211735	14211818
CHR3v01212004	+	14213772	14214044		CHR3v01212004	+	14211736	14211819
CHR3v01212004	+	14213774	14214256		CHR3v01212004	+	14211771	14212169
CHR3v01212004	+	14213775	14213858		CHR3v01212004	+	14211772	14211855
CHR3v01212004	+	14213791	14214273		CHR3v01212004	+	14211773	14212024
CHR3v01212004	+	14213793	14213876		CHR3v01212004	+	14211793	14212275
CHR3v01212004	+	14213795	14214277		CHR3v01212004	+	14211807	14212205
CHR3v01212004	+	14213809	14213892		CHR3v01212004	+	14211836	14211919
CHR3v01212004	+	14213812	14213895		CHR3v01212004	+	14211861	14212343
CHR3v01212004	+	14213815	14214276		CHR3v01212004	+	14211862	14211945
CHR3v01212004	+	14213819	14213902		CHR3v01212004	+	14211864	14212346
CHR3v01212004	+	14213837	14214319		CHR3v01212004	+	14211866	14212117
CHR3v01212004	+	14213855	14214337		CHR3v01212004	+	14211880	14212278
CHR3v01212004	+	14213858	14214340		CHR3v01212004	+	14211881	14211964
CHR3v01212004	+	14213876	14214358		CHR3v01212004	+	14211887	14212369
CHR3v01212004	+	14213900	14213983		CHR3v01212004	+	14211904	14212386
CHR3v01212004	+	14213935	14214018		CHR3v01212004	+	14211908	14212390
CHR3v01212004	+	14213936	14214271		CHR3v01212004	+	14211925	14212407
CHR3v01212004	+	14213938	14214336		CHR3v01212004	+	14211929	14212411
CHR3v01212004	+	14213957	14214040		CHR3v01212004	+	14211953	14212036
CHR3v01212004	+	14213960	14214043		CHR3v01212004	+	14211957	14212355
CHR3v01212004	+	14213962	14214045		CHR3v01212004	+	14211958	14212440
CHR3v01212004	+	14213980	14214063		CHR3v01212004	+	14211972	14212454
CHR3v01212004	+	14214067	14214150		CHR3v01212004	+	14211976	14212080
CHR3v01212004	+	14214071	14214154		CHR3v01212004	+	14211978	14212460
CHR3v01212004	-	14214078	14214161		CHR3v01212004	+	14211979	14212461
CHR3v01212004	+	14214118	14214264		CHR3v01212004	+	14211980	14212462
CHR3v01212004	+	14214119	14214202		CHR3v01212004	+	14211986	14212069
CHR3v01212004	+	14214146	14214229		CHR3v01212004	+	14211990	14212073
CHR3v01212004	+	14214163	14214246		CHR3v01212004	+	14211993	14212475
CHR3v01212004	+	14214172	14214255		CHR3v01212004	+	14211999	14212481
CHR3v01212004	+	14214176	14214364		CHR3v01212004	+	14212000	14212482
CHR3v01212004	+	14214177	14214344		CHR3v01212004	+	14212020	14212502
CHR3v01212004	+	14214192	14214296		CHR3v01212004	+	14212035	14212118
CHR3v01212004	+	14214196	14214363		CHR3v01212004	+	14212042	14212125
CHR3v01212004	+	14214212	14214295		CHR3v01212004	+	14212065	14212547
CHR3v01212004	+	14214222	14214305		CHR3v01212004	+	14212083	14212166
CHR3v01212004	+	14214283	14214471		CHR3v01212004	+	14212192	14212548
CHR3v01212004	+	14214371	14214475		CHR3v01212004	+	14212193	14212591
CHR3v01212004	+	14214373	14214477		CHR3v01212004	+	14212197	14212280
CHR3v01212004	+	16169900	16170004		CHR3v01212004	+	14212220	14212345
CHR3v01212004	+	16170322	16170405		CHR3v01212004	+	14212229	14212543
CHR3v01212004	-	1963742	1964056		CHR3v01212004	+	14212232	14212651
CHR3v01212004	-	1963748	1963873		CHR3v01212004	+	14212242	14212640
CHR3v01212004	-	1963755	1963838		CHR3v01212004	+	14212256	14212339
CHR3v01212004	+	1963787	1963870		CHR3v01212004	+	14212276	14212359
CHR3v01212004	+	1963798	1963881		CHR3v01212004	+	14212303	14212743
CHR3v01212004	-	1963922	1964005		CHR3v01212004	+	14212307	14212789
CHR3v01212004	+	1964080	1964163		CHR3v01212004	+	14212315	14212398
CHR3v01212004	+	1964089	1964172		CHR3v01212004	+	14212334	14212816
CHR3v01212004	-	1964091	1964174		CHR3v01212004	+	14212355	14212837
CHR3v01212004	-	1964138	1964263		CHR3v01212004	+	14212371	14212706
CHR3v01212004	-	1964189	1964272		CHR3v01212004	+	14212376	14212858
CHR3v01212004	+	1964209	1964334		CHR3v01212004	+	14212397	14212879
CHR3v01212004	+	1964285	1964368		CHR3v01212004	+	14212400	14212882
CHR3v01212004	+	1964324	1964407		CHR3v01212004	+	14212403	14212486
CHR3v01212004	-	1964360	1964443		CHR3v01212004	+	14212406	14212489
CHR3v01212004	+	1964475	1964579		CHR3v01212004	+	14212417	14212626
CHR3v01212004	+	1964500	1964583		CHR3v01212004	+	14212418	14212900
CHR3v01212004	+	1964555	1964638		CHR3v01212004	+	14212421	14212903
CHR3v01212004	+	1964600	1964683		CHR3v01212004	+	14212439	14212921
CHR3v01212004	+	1964603	1964728		CHR3v01212004	+	14212463	14212546
CHR3v01212004	-	1964618	1964701		CHR3v01212004	+	14212501	14212983
CHR3v01212004	-	1964620	1964955		CHR3v01212004	+	14212515	14212766
CHR3v01212004	-	1964662	1964745		CHR3v01212004	+	14212519	14213001
CHR3v01212004	+	1964668	1964751		CHR3v01212004	+	14212522	14213004
CHR3v01212004	-	1964671	1964838		CHR3v01212004	+	14212540	14213022
CHR3v01212004	-	1964716	1964799		CHR3v01212004	+	14212541	14213023
CHR3v01212004	-	1964749	1964832		CHR3v01212004	+	14212558	14213040
CHR3v01212004	+	1964757	1964840		CHR3v01212004	+	14212561	14213043
CHR3v01212004	-	1964772	1964897		CHR3v01212004	+	14212572	14212655
CHR3v01212004	-	1964775	1964879		CHR3v01212004	+	14212583	14213065
CHR3v01212004	-	1964815	1964919		CHR3v01212004	+	14212600	14212683
CHR3v01212004	-	1964864	1964947		CHR3v01212004	+	14212604	14213086
CHR3v01212004	-	1964968	1965072		CHR3v01212004	+	14212624	14212707
CHR3v01212004	-	1965017	1965100		CHR3v01212004	+	14212625	14212708
CHR3v01212004	+	1965160	1965243		CHR3v01212004	+	14212662	14213144
CHR3v01212004	-	1965188	1965271		CHR3v01212004	+	14212699	14212782
CHR3v01212004	-	1965195	1965530		CHR3v01212004	+	14212705	14213187
CHR3v01212004	-	1965216	1965299		CHR3v01212004	+	14212706	14213188
CHR3v01212004	-	1965264	1965368		CHR3v01212004	+	14212726	14213208
CHR3v01212004	-	1965265	1965348		CHR3v01212004	+	14212727	14213209
CHR3v01212004	-	1965284	1965367		CHR3v01212004	+	14212733	14213215
CHR3v01212004	-	1965365	1965448		CHR3v01212004	+	14212747	14212830
CHR3v01212004	-	1965404	1965487		CHR3v01212004	+	14212748	14212831
CHR3v01212004	-	1965405	1965488		CHR3v01212004	+	14212754	14213236
CHR3v01212004	+	1965464	1965547		CHR3v01212004	+	14212775	14213257
CHR3v01212004	-	1965583	1965666		CHR3v01212004	+	14212799	14213281
CHR3v01212004	+	1965614	1965718		CHR3v01212004	+	14212800	14213282
CHR3v01212004	-	1965638	1965742		CHR3v01212004	+	14212821	14212904
CHR3v01212004	-	1965647	1965751		CHR3v01212004	+	14212843	14212926
CHR3v01212004	-	1965960	1966043		CHR3v01212004	+	14212849	14212932
CHR3v01212004	-	1966071	1966511		CHR3v01212004	+	14212850	14212933
CHR3v01212004	-	1966134	1966217		CHR3v01212004	+	14212852	14213334
CHR3v01212004	-	1966215	1966298		CHR3v01212004	+	14212854	14213147
CHR3v01212004	-	1966258	1966572		CHR3v01212004	+	14212857	14212940
CHR3v01212004	-	1966303	1966638		CHR3v01212004	+	14212874	14213230
CHR3v01212004	-	1966307	1966453		CHR3v01212004	+	14212876	14213148
CHR3v01212004	-	1966311	1966562		CHR3v01212004	+	14212877	14212960
CHR3v01212004	-	1966312	1966710		CHR3v01212004	-	14212895	14212978
CHR3v01212004	-	1966313	1966564		CHR3v01212004	+	14212922	14213404
CHR3v01212004	-	1966321	1966404		CHR3v01212004	+	14212925	14213323
CHR3v01212004	-	1966326	1966451		CHR3v01212004	+	14212935	14213333
CHR3v01212004	-	1966327	1966578		CHR3v01212004	+	14212943	14213425
CHR3v01212004	-	1966330	1966581		CHR3v01212004	+	14212945	14213406
CHR3v01212004	-	1966334	1966417		CHR3v01212004	+	14212950	14213117
CHR3v01212004	-	1966348	1966431		CHR3v01212004	+	14212953	14213225
CHR3v01212004	-	1966351	1966434		CHR3v01212004	+	14212955	14213206
CHR3v01212004	-	1966353	1966436		CHR3v01212004	+	14212964	14213446
CHR3v01212004	-	1966356	1966439		CHR3v01212004	+	14212968	14213303
CHR3v01212004	+	1966411	1966494		CHR3v01212004	+	14212969	14213409
CHR3v01212004	-	1966426	1966509		CHR3v01212004	+	14212970	14213095
CHR3v01212004	-	1966427	1966594		CHR3v01212004	+	14212975	14213226
CHR3v01212004	-	1966429	1966512		CHR3v01212004	+	14212985	14213467
CHR3v01212004	-	1966439	1966522		CHR3v01212004	+	14212988	14213071
CHR3v01212004	-	1966444	1966527		CHR3v01212004	+	14212995	14213477
CHR3v01212004	-	1966456	1966539		CHR3v01212004	+	14212997	14213479
CHR3v01212004	-	1966461	1966565		CHR3v01212004	+	14213029	14213511
CHR3v01212004	-	1966462	1966566		CHR3v01212004	+	14213050	14213532
CHR3v01212004	-	1966463	1966819		CHR3v01212004	+	14213052	14213534
CHR3v01212004	-	1966466	1966927		CHR3v01212004	+	14213062	14213145
CHR3v01212004	-	1966474	1966557		CHR3v01212004	+	14213067	14213150
CHR3v01212004	-	1966487	1966570		CHR3v01212004	+	14213071	14213154
CHR3v01212004	+	1966488	1966571		CHR3v01212004	+	14213073	14213156
CHR3v01212004	-	1966501	1966584		CHR3v01212004	+	14213102	14213584
CHR3v01212004	-	1966505	1966588		CHR3v01212004	+	14213103	14213186
CHR3v01212004	-	1966533	1966616		CHR3v01212004	+	14213105	14213587
CHR3v01212004	-	1966534	1966617		CHR3v01212004	+	14213119	14213601
CHR3v01212004	+	1966600	1966683		CHR3v01212004	+	14213120	14213581
CHR3v01212004	-	1966851	1966955		CHR3v01212004	+	14213121	14213498
CHR3v01212004	-	1967212	1967337		CHR3v01212004	+	14213126	14213608
CHR3v01212004	-	1967218	1967322		CHR3v01212004	+	14213131	14213613
CHR3v01212004	-	1967227	1967310		CHR3v01212004	+	14213140	14213223
CHR3v01212004	-	1967232	1967336		CHR3v01212004	+	14213141	14213224
CHR3v01212004	+	1967257	1967340		CHR3v01212004	+	14213146	14213229
CHR3v01212004	-	1967268	1967351		CHR3v01212004	+	14213152	14213634
CHR3v01212004	+	1967365	1967448		CHR3v01212004	+	14213172	14213255
CHR3v01212004	-	1967441	1967566		CHR3v01212004	+	14213177	14213617
CHR3v01212004	-	1967456	1967560		CHR3v01212004	+	14213178	14213597
CHR3v01212004	-	1967460	1967585		CHR3v01212004	+	14213197	14213280
CHR3v01212004	-	1967489	1967572		CHR3v01212004	+	14213200	14213619
CHR3v01212004	-	1967497	1967580		CHR3v01212004	+	14213221	14213304
CHR3v01212004	-	1967499	1967582		CHR3v01212004	+	14213329	14213412
CHR3v01212004	-	1967501	1967584		CHR3v01212004	+	14213340	14213738
CHR3v01212004	-	1967511	1967594		CHR3v01212004	+	14213362	14213718
CHR3v01212004	+	1967596	1967868		CHR3v01212004	+	14213394	14213876
CHR3v01212004	-	1967613	1967696		CHR3v01212004	+	14213400	14213483
CHR3v01212004	+	1967633	1967926		CHR3v01212004	+	14213402	14213758
CHR3v01212004	+	1967636	1967866		CHR3v01212004	+	14213428	14213721
CHR3v01212004	+	1967638	1967721		CHR3v01212004	+	14213443	14213568
CHR3v01212004	+	1967639	1967722		CHR3v01212004	+	14213451	14213723
CHR3v01212004	+	1967640	1967723		CHR3v01212004	+	14213456	14213728
CHR3v01212004	+	1967641	1967871		CHR3v01212004	+	14213476	14213811
CHR3v01212004	+	1967645	1967728		CHR3v01212004	+	14213486	14213569
CHR3v01212004	+	1967653	1967862		CHR3v01212004	+	14213491	14213574
CHR3v01212004	+	1967657	1967740		CHR3v01212004	+	14213504	14213902
CHR3v01212004	+	1967662	1967745		CHR3v01212004	+	14213525	14214007
CHR3v01212004	+	1967672	1967881		CHR3v01212004	+	14213567	14213650
CHR3v01212004	+	1967673	1967756		CHR3v01212004	+	14213595	14214014
CHR3v01212004	+	1967674	1967757		CHR3v01212004	+	14213596	14213679
CHR3v01212004	+	1967675	1967758		CHR3v01212004	+	14213619	14214059
CHR3v01212004	-	1967690	1967773		CHR3v01212004	+	14213641	14213724
CHR3v01212004	+	1967731	1967877		CHR3v01212004	+	14213663	14214040
CHR3v01212004	+	1967733	1967858		CHR3v01212004	+	14213665	14213748
CHR3v01212004	+	1967745	1967828		CHR3v01212004	+	14213669	14213920
CHR3v01212004	+	1967748	1967873		CHR3v01212004	+	14213671	14213985
CHR3v01212004	+	1967750	1967854		CHR3v01212004	+	14213672	14213755
CHR3v01212004	+	1967753	1967857		CHR3v01212004	+	14213686	14214168
CHR3v01212004	+	1967762	1967845		CHR3v01212004	+	14213707	14214189
CHR3v01212004	+	1967767	1967850		CHR3v01212004	+	14213711	14213794
CHR3v01212004	+	1967780	1967863		CHR3v01212004	+	14213713	14213796
CHR3v01212004	+	1967786	1967869		CHR3v01212004	+	14213726	14213809
CHR3v01212004	-	1967894	1967977		CHR3v01212004	+	14213746	14213829
CHR3v01212004	-	1968306	1968389		CHR3v01212004	+	14213751	14214044
CHR3v01212004	+	1968428	1968511		CHR3v01212004	+	14213772	14214254
CHR3v01212004	+	1968433	1968537		CHR3v01212004	+	14213775	14214257
CHR3v01212004	+	1968442	1968546		CHR3v01212004	+	14213793	14214275
CHR3v01212004	-	1968466	1968570		CHR3v01212004	+	14213796	14214278
CHR3v01212004	-	1968622	1968705		CHR3v01212004	+	14213814	14214296
CHR3v01212004	-	1968637	1968720		CHR3v01212004	+	14213832	14213915
CHR3v01212004	+	1968654	1968779		CHR3v01212004	+	14213835	14214317
CHR3v01212004	+	1968697	1968780		CHR3v01212004	+	14213856	14214338
CHR3v01212004	-	1968806	1968889		CHR3v01212004	+	14213877	14214359
CHR3v01212004	-	1968884	1968967		CHR3v01212004	+	14213897	14214190
CHR3v01212004	-	1968940	1969023		CHR3v01212004	+	14213934	14214017
CHR3v01212004	+	1969110	1969466		CHR3v01212004	+	14213935	14214060
CHR3v01212004	+	1969131	1969214		CHR3v01212004	+	14213936	14214019
CHR3v01212004	+	1969227	1969310		CHR3v01212004	+	14213981	14214064
CHR3v01212004	+	1969235	1969318		CHR3v01212004	+	14213989	14214408
CHR3v01212004	-	1969251	1969418		CHR3v01212004	+	14214004	14214087
CHR3v01212004	-	1969254	1969379		CHR3v01212004	+	14214073	14214156
CHR3v01212004	-	1969277	1969402		CHR3v01212004	+	14214076	14214432
CHR3v01212004	-	1969289	1969372		CHR3v01212004	+	14214085	14214273
CHR3v01212004	-	1969290	1969373		CHR3v01212004	+	14214086	14214169
CHR3v01212004	-	1969297	1969380		CHR3v01212004	+	14214113	14214364
CHR3v01212004	-	1969300	1969425		CHR3v01212004	+	14214119	14214433
CHR3v01212004	-	1969316	1969420		CHR3v01212004	+	14214140	14214223
CHR3v01212004	-	1969344	1969427		CHR3v01212004	+	14214172	14214276
CHR3v01212004	+	1969344	1969511		CHR3v01212004	+	14214173	14214340
CHR3v01212004	-	1969431	1969514		CHR3v01212004	+	14214174	14214467
CHR3v01212004	-	1969454	1969579		CHR3v01212004	+	14214175	14214447
CHR3v01212004	+	1969481	1969564		CHR3v01212004	+	14214181	14214264
CHR3v01212004	-	1969499	1969582		CHR3v01212004	-	14214182	14214265
CHR3v01212004	-	1969544	1969627		CHR3v01212004	+	14214219	14214407
CHR3v01212004	-	1969599	1969682		CHR3v01212004	+	14214279	14214362
CHR3v01212004	-	1969600	1969683		CHR3v01212004	+	14214283	14214366
CHR3v01212004	-	1969603	1969770		CHR3v01212004	+	14214348	14214431
CHR3v01212004	+	1969739	1969822		CHR3v01212004	+	14214352	14214477
CHR3v01212004	-	1969758	1970093		CHR3v01212004	+	14214368	14214451
CHR3v01212004	-	1969775	1969858		CHR3v01212004	+	14214375	14214458
CHR3v01212004	-	1969778	1969861		CHR3v01212004	+	14215254	14215337
CHR3v01212004	-	1969800	1969883		CHR3v01212004	+	14215408	14215491
CHR3v01212004	-	1969814	1969897		CHR3v01212004	-	15688704	15688787
CHR3v01212004	-	1969848	1970120		CHR3v01212004	-	1963735	1963839
CHR3v01212004	-	1969893	1969976		CHR3v01212004	-	1963736	1964071
CHR3v01212004	-	1969909	1969992		CHR3v01212004	-	1963748	1963831
CHR3v01212004	-	1969911	1969994		CHR3v01212004	-	1963755	1963859
CHR3v01212004	-	1969912	1969995		CHR3v01212004	-	1963757	1963840
CHR3v01212004	+	1970008	1970091		CHR3v01212004	-	1963762	1963845
CHR3v01212004	-	1970008	1970112		CHR3v01212004	-	1963764	1963868
CHR3v01212004	-	1970013	1970117		CHR3v01212004	-	1963766	1963870
CHR3v01212004	-	1970019	1970102		CHR3v01212004	-	1963786	1963869
CHR3v01212004	+	1970126	1970209		CHR3v01212004	+	1963790	1963873
CHR3v01212004	+	1970177	1970260		CHR3v01212004	-	1963795	1963878
CHR3v01212004	+	1970178	1970282		CHR3v01212004	-	1963796	1963879
CHR3v01212004	-	1970245	1970391		CHR3v01212004	-	1963863	1963946
CHR3v01212004	-	1970270	1970395		CHR3v01212004	-	1963886	1963969
CHR3v01212004	-	1970283	1970366		CHR3v01212004	-	1963956	1964039
CHR3v01212004	-	1970296	1970379		CHR3v01212004	-	1963958	1964041
CHR3v01212004	-	1970301	1970384		CHR3v01212004	-	1963959	1964042
CHR3v01212004	+	4561119	4561202		CHR3v01212004	-	1963989	1964072
CHR3v01212004	+	4951604	4951687		CHR3v01212004	-	1964013	1964096
CHR4v01212004	+	13782223	13782306		CHR3v01212004	+	1964078	1964161
CHR4v01212004	-	1483030	1483113		CHR3v01212004	+	1964082	1964165
CHR4v01212004	+	3054680	3054784		CHR3v01212004	-	1964087	1964170
CHR4v01212004	+	3054691	3054774		CHR3v01212004	+	1964088	1964171
CHR4v01212004	+	3054699	3054803		CHR3v01212004	+	1964204	1964287
CHR4v01212004	+	3054700	3054783		CHR3v01212004	+	1964205	1964288
CHR4v01212004	+	3054709	3054813		CHR3v01212004	+	1964282	1964428
CHR4v01212004	+	3054715	3054819		CHR3v01212004	-	1964286	1964369
CHR4v01212004	+	3055178	3055282		CHR3v01212004	+	1964300	1964593
CHR4v01212004	+	3055189	3055272		CHR3v01212004	+	1964473	1964934
CHR4v01212004	+	3055197	3055301		CHR3v01212004	+	1964475	1964831
CHR4v01212004	+	3055198	3055281		CHR3v01212004	+	1964494	1964577
CHR4v01212004	+	3055207	3055311		CHR3v01212004	+	1964496	1964579
CHR4v01212004	+	3055213	3055317		CHR3v01212004	-	1964514	1964597
CHR4v01212004	+	3057158	3057262		CHR3v01212004	+	1964600	1964830
CHR4v01212004	+	3057159	3057242		CHR3v01212004	-	1964603	1964728
CHR4v01212004	+	3057168	3057272		CHR3v01212004	-	1964620	1964745
CHR4v01212004	+	3057174	3057278		CHR3v01212004	+	1964642	1964725
CHR4v01212004	+	3057656	3057760		CHR3v01212004	+	1964659	1964742
CHR4v01212004	+	3057657	3057740		CHR3v01212004	+	1964683	1964766
CHR4v01212004	+	3057666	3057770		CHR3v01212004	+	1964736	1964840
CHR4v01212004	+	3057672	3057776		CHR3v01212004	+	1964746	1964829
CHR4v01212004	+	3058652	3058756		CHR3v01212004	-	1964749	1964916
CHR4v01212004	+	3058653	3058736		CHR3v01212004	+	1964754	1964837
CHR4v01212004	+	3058662	3058766		CHR3v01212004	-	1964794	1964919
CHR4v01212004	+	3058668	3058772		CHR3v01212004	-	1964814	1964918
CHR4v01212004	+	3059150	3059254		CHR3v01212004	-	1964823	1964927
CHR4v01212004	+	3059151	3059234		CHR3v01212004	+	1964856	1964939
CHR4v01212004	+	3059160	3059264		CHR3v01212004	-	1964953	1965036
CHR4v01212004	+	3059166	3059270		CHR3v01212004	-	1964968	1965240
CHR4v01212004	+	3059648	3059752		CHR3v01212004	-	1964973	1965077
CHR4v01212004	+	3059649	3059732		CHR3v01212004	-	1964989	1965072
CHR4v01212004	+	3059658	3059762		CHR3v01212004	-	1965017	1965142
CHR4v01212004	+	3059664	3059768		CHR3v01212004	-	1965060	1965143
CHR4v01212004	+	3060146	3060250		CHR3v01212004	-	1965062	1965145
CHR4v01212004	+	3060147	3060230		CHR3v01212004	+	1965155	1965238
CHR4v01212004	+	3060156	3060260		CHR3v01212004	+	1965156	1965239
CHR4v01212004	+	3060162	3060266		CHR3v01212004	-	1965188	1965292
CHR4v01212004	+	3060644	3060748		CHR3v01212004	-	1965195	1965299
CHR4v01212004	+	3060645	3060728		CHR3v01212004	-	1965233	1965316
CHR4v01212004	+	3060654	3060758		CHR3v01212004	-	1965242	1965409
CHR4v01212004	+	3060660	3060764		CHR3v01212004	-	1965265	1965663
CHR4v01212004	+	3061123	3061206		CHR3v01212004	-	1965268	1965666
CHR4v01212004	+	4909151	4909234		CHR3v01212004	-	1965286	1965369
CHR5v01212004	+	11185353	11185436		CHR3v01212004	-	1965289	1965372
CHR5v01212004	+	11185784	11185888		CHR3v01212004	+	1965459	1965542
CHR5v01212004	+	11185795	11185878		CHR3v01212004	-	1965627	1965752
CHR5v01212004	+	11185803	11185907		CHR3v01212004	-	1965637	1965741
CHR5v01212004	+	11185804	11185887		CHR3v01212004	-	1965668	1965751
CHR5v01212004	+	11185813	11185938		CHR3v01212004	-	1965674	1965757
CHR5v01212004	+	11185819	11185923		CHR3v01212004	-	1965680	1965763
CHR5v01212004	+	11185851	11185934		CHR3v01212004	-	1965685	1965768
CHR5v01212004	+	11186286	11186390		CHR3v01212004	-	1965686	1965769
CHR5v01212004	+	11186297	11186380		CHR3v01212004	-	1965796	1965900
CHR5v01212004	+	11186305	11186409		CHR3v01212004	-	1966160	1966243
CHR5v01212004	+	11186306	11186389		CHR3v01212004	-	1966256	1966570
CHR5v01212004	+	11186315	11186440		CHR3v01212004	-	1966277	1966360
CHR5v01212004	+	11186321	11186425		CHR3v01212004	-	1966300	1966572
CHR5v01212004	+	11186353	11186436		CHR3v01212004	-	1966301	1966510
CHR5v01212004	+	11188368	11188451		CHR3v01212004	-	1966312	1966584
CHR5v01212004	+	11188839	11188922		CHR3v01212004	-	1966313	1966522
CHR5v01212004	-	12841464	12841547		CHR3v01212004	-	1966314	1966565
CHR5v01212004	-	12884183	12884266		CHR3v01212004	-	1966320	1966760
CHR5v01212004	-	16925922	16926047		CHR3v01212004	-	1966324	1966407
CHR5v01212004	-	17455654	17455737		CHR3v01212004	-	1966325	1966408
CHR5v01212004	-	22340058	22340141		CHR3v01212004	-	1966326	1966409
CHR5v01212004	-	24040060	24040185		CHR3v01212004	-	1966327	1966767
CHR5v01212004	-	24040063	24040188		CHR3v01212004	-	1966328	1966411
CHR5v01212004	-	24040066	24040191		CHR3v01212004	-	1966333	1966416
CHR5v01212004	-	24040069	24040194		CHR3v01212004	-	1966335	1966418
CHR5v01212004	-	24040072	24040197		CHR3v01212004	+	1966350	1966496
CHR5v01212004	-	24040075	24040200		CHR3v01212004	+	1966407	1966511
CHR5v01212004	-	24040078	24040182		CHR3v01212004	-	1966428	1966595
CHR5v01212004	+	25296833	25296916		CHR3v01212004	-	1966429	1966596
CHR5v01212004	+	3014979	3015062		CHR3v01212004	-	1966431	1966577
CHR5v01212004	+	3014980	3015063		CHR3v01212004	+	1966433	1966558
					CHR3v01212004	-	1966434	1966517
					CHR3v01212004	-	1966435	1966581
					CHR3v01212004	-	1966438	1966521
					CHR3v01212004	-	1966440	1966523
					CHR3v01212004	-	1966441	1966713
					CHR3v01212004	-	1966464	1966568
					CHR3v01212004	-	1966465	1966548
					CHR3v01212004	-	1966466	1966885
					CHR3v01212004	-	1966479	1966562
					CHR3v01212004	-	1966483	1966566
					CHR3v01212004	-	1966484	1966567
					CHR3v01212004	-	1966495	1966578
					CHR3v01212004	-	1966530	1966613
					CHR3v01212004	-	1966635	1966718
					CHR3v01212004	-	1966731	1966835
					CHR3v01212004	-	1966854	1966937
					CHR3v01212004	-	1967218	1967700
					CHR3v01212004	-	1967232	1967567
					CHR3v01212004	-	1967233	1967316
					CHR3v01212004	-	1967260	1967343
					CHR3v01212004	-	1967265	1967411
					CHR3v01212004	-	1967268	1967582
					CHR3v01212004	-	1967269	1967751
					CHR3v01212004	-	1967274	1967357
					CHR3v01212004	-	1967284	1967430
					CHR3v01212004	-	1967285	1967368
					CHR3v01212004	-	1967288	1967371
					CHR3v01212004	-	1967289	1967771
					CHR3v01212004	-	1967300	1967383
					CHR3v01212004	-	1967310	1967792
					CHR3v01212004	-	1967331	1967414
					CHR3v01212004	-	1967332	1967415
					CHR3v01212004	+	1967370	1967453
					CHR3v01212004	-	1967434	1967580
					CHR3v01212004	-	1967437	1967520
					CHR3v01212004	-	1967442	1967777
					CHR3v01212004	-	1967447	1967530
					CHR3v01212004	-	1967449	1967532
					CHR3v01212004	-	1967456	1967581
					CHR3v01212004	-	1967500	1967583
					CHR3v01212004	-	1967502	1967585
					CHR3v01212004	-	1967503	1967586
					CHR3v01212004	-	1967506	1967589
					CHR3v01212004	-	1967509	1967655
					CHR3v01212004	-	1967549	1967653
					CHR3v01212004	+	1967616	1967720
					CHR3v01212004	+	1967633	1967884
					CHR3v01212004	+	1967634	1967864
					CHR3v01212004	+	1967636	1967719
					CHR3v01212004	+	1967639	1967869
					CHR3v01212004	+	1967640	1967870
					CHR3v01212004	+	1967645	1967749
					CHR3v01212004	-	1967647	1967730
					CHR3v01212004	+	1967648	1967857
					CHR3v01212004	+	1967649	1967858
					CHR3v01212004	+	1967651	1967860
					CHR3v01212004	+	1967652	1967756
					CHR3v01212004	+	1967660	1967743
					CHR3v01212004	+	1967661	1967744
					CHR3v01212004	+	1967662	1967871
					CHR3v01212004	+	1967663	1967746
					CHR3v01212004	+	1967667	1967750
					CHR3v01212004	+	1967670	1967753
					CHR3v01212004	+	1967672	1967755
					CHR3v01212004	-	1967673	1967756
					CHR3v01212004	-	1967674	1967778
					CHR3v01212004	-	1967688	1967834
					CHR3v01212004	+	1967762	1967866
					CHR3v01212004	+	1967766	1967849
					CHR3v01212004	+	1967768	1967851
					CHR3v01212004	+	1967773	1967856
					CHR3v01212004	+	1967776	1967859
					CHR3v01212004	+	1967779	1967883
					CHR3v01212004	+	1967785	1967868
					CHR3v01212004	+	1967824	1967928
					CHR3v01212004	-	1968312	1968395
					CHR3v01212004	+	1968415	1968498
					CHR3v01212004	+	1968416	1968499
					CHR3v01212004	+	1968421	1968504
					CHR3v01212004	+	1968427	1968510
					CHR3v01212004	-	1968428	1968511
					CHR3v01212004	+	1968432	1968557
					CHR3v01212004	+	1968433	1968516
					CHR3v01212004	+	1968443	1968547
					CHR3v01212004	+	1968521	1968604
					CHR3v01212004	-	1968628	1968711
					CHR3v01212004	-	1968642	1968725
					CHR3v01212004	+	1968732	1969214
					CHR3v01212004	+	1968795	1968878
					CHR3v01212004	+	1968943	1969026
					CHR3v01212004	-	1968944	1969027
					CHR3v01212004	-	1968945	1969028
					CHR3v01212004	+	1969105	1969209
					CHR3v01212004	+	1969110	1969193
					CHR3v01212004	-	1969143	1969226
					CHR3v01212004	-	1969163	1969246
					CHR3v01212004	-	1969243	1969683
					CHR3v01212004	-	1969248	1969730
					CHR3v01212004	-	1969251	1969523
					CHR3v01212004	-	1969275	1969379
					CHR3v01212004	-	1969277	1969381
					CHR3v01212004	-	1969285	1969368
					CHR3v01212004	-	1969290	1969772
					CHR3v01212004	-	1969295	1969672
					CHR3v01212004	-	1969300	1969446
					CHR3v01212004	-	1969302	1969406
					CHR3v01212004	-	1969309	1969728
					CHR3v01212004	-	1969312	1969794
					CHR3v01212004	-	1969313	1969417
					CHR3v01212004	-	1969314	1969397
					CHR3v01212004	-	1969322	1969405
					CHR3v01212004	-	1969333	1969416
					CHR3v01212004	-	1969337	1969420
					CHR3v01212004	-	1969345	1969428
					CHR3v01212004	-	1969351	1969434
					CHR3v01212004	-	1969352	1969435
					CHR3v01212004	-	1969416	1969499
					CHR3v01212004	+	1969454	1969579
					CHR3v01212004	-	1969457	1969582
					CHR3v01212004	+	1969585	1969668
					CHR3v01212004	-	1969603	1969686
					CHR3v01212004	-	1969605	1969688
					CHR3v01212004	-	1969662	1969997
					CHR3v01212004	-	1969683	1969766
					CHR3v01212004	-	1969690	1970172
					CHR3v01212004	-	1969696	1969779
					CHR3v01212004	-	1969754	1969900
					CHR3v01212004	-	1969758	1969883
					CHR3v01212004	-	1969778	1969882
					CHR3v01212004	+	1969813	1969896
					CHR3v01212004	-	1969893	1970375
					CHR3v01212004	-	1969894	1970376
					CHR3v01212004	-	1969895	1969978
					CHR3v01212004	-	1969910	1969993
					CHR3v01212004	-	1969913	1969996
					CHR3v01212004	-	1969915	1969998
					CHR3v01212004	-	1970008	1970154
					CHR3v01212004	-	1970011	1970094
					CHR3v01212004	+	1970012	1970095
					CHR3v01212004	-	1970013	1970096
					CHR3v01212004	-	1970017	1970100
					CHR3v01212004	-	1970021	1970125
					CHR3v01212004	+	1970141	1970224
					CHR3v01212004	+	1970178	1970387
					CHR3v01212004	+	1970199	1970282
					CHR3v01212004	-	1970224	1970391
					CHR3v01212004	-	1970243	1970347
					CHR3v01212004	-	1970247	1970330
					CHR3v01212004	-	1970262	1970366
					CHR3v01212004	-	1970292	1970396
					CHR3v01212004	-	1970297	1970401
					CHR3v01212004	-	1970299	1970382
					CHR3v01212004	+	1970303	1970386
					CHR3v01212004	+	1970312	1970395
					CHR3v01212004	+	1970314	1970397
					CHR3v01212004	-	1970340	1970423
					CHR3v01212004	+	4561128	4561211
					CHR3v01212004	+	4951613	4951696
					CHR3v01212004	+	5862149	5862274
					CHR3v01212004	-	5862155	5862238
					CHR3v01212004	+	5862171	5862296
					CHR4v01212004	+	13782232	13782315
					CHR4v01212004	-	1483021	1483104
					CHR4v01212004	+	3054690	3054815
					CHR4v01212004	+	3054697	3054801
					CHR4v01212004	+	3054701	3054784
					CHR4v01212004	+	3054716	3054820
					CHR4v01212004	+	3054731	3054814
					CHR4v01212004	+	3055188	3055313
					CHR4v01212004	+	3055195	3055299
					CHR4v01212004	+	3055199	3055282
					CHR4v01212004	+	3055214	3055318
					CHR4v01212004	+	3055229	3055312
					CHR4v01212004	+	3055707	3055811
					CHR4v01212004	+	3057156	3057260
					CHR4v01212004	+	3057170	3057274
					CHR4v01212004	+	3057175	3057279
					CHR4v01212004	+	3057190	3057273
					CHR4v01212004	+	3057654	3057758
					CHR4v01212004	+	3057668	3057772
					CHR4v01212004	+	3057673	3057777
					CHR4v01212004	+	3057688	3057771
					CHR4v01212004	+	3058171	3058275
					CHR4v01212004	+	3058650	3058754
					CHR4v01212004	+	3058664	3058768
					CHR4v01212004	+	3058669	3058773
					CHR4v01212004	+	3058684	3058767
					CHR4v01212004	+	3059148	3059252
					CHR4v01212004	+	3059162	3059266
					CHR4v01212004	+	3059167	3059271
					CHR4v01212004	+	3059182	3059265
					CHR4v01212004	+	3059646	3059750
					CHR4v01212004	+	3059660	3059764
					CHR4v01212004	+	3059665	3059769
					CHR4v01212004	+	3059680	3059763
					CHR4v01212004	+	3060144	3060248
					CHR4v01212004	+	3060158	3060262
					CHR4v01212004	+	3060163	3060267
					CHR4v01212004	+	3060178	3060261
					CHR4v01212004	+	3060642	3060746
					CHR4v01212004	+	3060656	3060760
					CHR4v01212004	+	3060661	3060765
					CHR4v01212004	+	3060676	3060759
					CHR5v01212004	+	11184797	11184901
					CHR5v01212004	+	11184831	11184914
					CHR5v01212004	+	11184970	11185053
					CHR5v01212004	+	11185472	11185555
					CHR5v01212004	+	11185794	11185919
					CHR5v01212004	+	11185801	11185905
					CHR5v01212004	+	11185805	11185888
					CHR5v01212004	+	11185820	11185924
					CHR5v01212004	+	11185835	11185918
					CHR5v01212004	+	11185850	11185933
					CHR5v01212004	+	11185852	11185935
					CHR5v01212004	+	11185974	11186057
					CHR5v01212004	+	11186296	11186421
					CHR5v01212004	+	11186303	11186407
					CHR5v01212004	+	11186307	11186390
					CHR5v01212004	+	11186322	11186426
					CHR5v01212004	+	11186337	11186420
					CHR5v01212004	+	11186352	11186435
					CHR5v01212004	+	11186354	11186437
					CHR5v01212004	+	11186476	11186559
					CHR5v01212004	+	11186827	11186910
					CHR5v01212004	+	11186840	11186923
					CHR5v01212004	+	11187329	11187412
					CHR5v01212004	+	11187342	11187425
					CHR5v01212004	+	11187831	11187914
					CHR5v01212004	+	11187844	11187927
					CHR5v01212004	-	12841460	12841543
					CHR5v01212004	-	12841462	12841545
					CHR5v01212004	-	12841463	12841546
					CHR5v01212004	-	12884179	12884262
					CHR5v01212004	-	12884181	12884264
					CHR5v01212004	-	12884182	12884265
					CHR5v01212004	+	25296842	25296925

## Sheet: Table S6
Table S6 Primers for RT-qPCR and probes for miRNA northern blot
	Sequence (5'-3')	Purpose
miR169c	CCGGCAAGTCATCCTTGGCTG	probe
miR156h	GTGCTCTCTTTCTTCTGTCA	probe
miR160	TGGCATACAGGGAGCCAGGCA	probe
miR164	TGCACGTGCCCTGCTTCTCCA	probe
miR166	CCTCGAGCCAGACAACAGTCC	probe
miR167	TAGATCATGCTGGCAGCTTCA	probe
miR390	GGCGCTATCCCTCCTGAGCTT	probe
U6	GCTAATCTTCTCTGTATCGTTCC	probe
ARF10_F	ACATTTCGTGTTCTTTAACTATGGG	qRT-PCR
ARF10_R	ACAATTCTTGGTACGAGCCA	qRT-PCR
NAC1_F	GGGGAAATAACGTGTGCTTG	qRT-PCR
NAC1_R	CAATCACCTATCCCATCATG	qRT-PCR
ARF6_F	TAATAACACTCAATCCGTATTGGAG	qRT-PCR
ARF_R	GGCATCAAAAGAGAAGATGAATCTA	qRT-PCR
PHV_F	GCTCTTTGCTCCGAGTTCGC	qRT-PCR
PHV_R	CGAGGGTAAAAGCCAAGCAG	qRT-PCR
TAS3_F	GATTATTGGATCCGCTGTGC	qRT-PCR
TAS3_R	CAAGAAAAGGCCTTACAAGG	qRT-PCR
AT4G33380_F	AGGAGAGGAAGAGCCTGAGGA	qRT-PCR
AT4G33380_R	ATCTCACTGCAGCACCACCA	qRT-PCR
